# Supplementary material for: Pneumo-Typer: integrated genomic surveillance tool for capsule genotype, serotype and sequence type in Streptococcus pneumoniae informs vaccine strategies
Source: bioRxiv preprint, doi:10.1101/2025.02.13.638184, version 2 (2025-04-29)
Supplement: Supplementary tables [file 638184_file02.xlsx]

## Sheet: Table S1
Table 1 A summary of the modified Capsular Typing Variant Database (CTVD) used by Pneumo-Typer
1.###06A_06B_06C_06D_06E###
wciP	06A, 06B	#snps discriminating 06A and 06B
wciP	06C, 06D	#snps discriminating 06C and 06D
2.###07A_07F_40###
wcwD	07F: normal, 07A: pseudo#insertionA587	#frameshift mutation using this wcwD-spc07F to discriminating 07F and 07A
wcwK	07B, 07C, '40'	#snps
3.###09A_09L_09N_09V###
wcjE	09V: normal, 09A: pseudo#deletionG722	#frameshift mutation using this wcjE-SPC09V to discriminating 09V and 09A
wcjA	09L, 09N	#snps not use
#wcjB	09L, 09N	#snps not use
4.###10A_10B###
wcrC	10A, 10B	#wrcC was different in all four serotype (10A,10B,10C and 10F), but this gene was only used for discriminating 10A and 10B
5.###11A_11B_11D_11F###
wcrL	11A, 11D, 11F	#snps using this gene to discriminate 11A from 11D and 11F
6.###12B_12F###
wciI-SPC12F	12B, 12F	#allele using wciI-12F to discriminating 12F
wcxF-SPC46	12A, 46	#snps wcxF-SPC46 was used to discriminating 46 and 12A
7.###15A_15B_15C_15F###
wciZ	15B: normal, 15C: pseudo#repeatTA413	#frameshift mutation used to discriminating 15B and 15C
8.###18A_18B_18C_18F###
wcxM	18F: 1, 18A: 0, 18B: 0, 18C: 0	#presence used to obtain 18F
wciX	18C: normal, 18B: pseudo#stopcodon	#frameshift mutation used to discriminating 18B and 18C
9.###19A_19AF###
wzy	19A, 19F, 19C, 19B	#allele used to discriminate 19A and 19F
10.###22A_22F###
wcwA	22A: 1, 22F: 0	#absence this gene was used to obtain 22F which does not contain wcwA. (Note: reference 22F have this gene)
11.###23A_23B_23F###
wchA	23A, 23B|23F	#allele
wzy	23A, 23B, 23F	#allele
12.###25A_25F_38###
wcyV	25A: 0, 25F: 0, 38: 1	#presence used to obtain 38
13.###28A_28F###
wciU	28A, 28F	#snps
14.###33A_33F_33B_33D###
wciB	33F: 1, 33B: 0	#presence used to obtain 33F
wcjE	33A: 1, 33F: 0	#absence pseudo#inserionT433 in 33F that causing frameshift mutation. /** When predict serotype is 33F, wcjE gene is the key choice for determinate serotype **/
wciN-SPC33B	33B, 33D	#presence wciN-SPC33B used to discriminating 33B and 33D
15.###35A_35C_42###
wcrX	35C: normal, '42': normal, 35A: pseudo#insertionA248	#frameshift mutation
wciG	35D: 0, 35B: 1	#absence used to obtain 35D
16.###41A_41F###
wcrX	41F: normal, 41A: pseudo#deletionG23	#frameshift mutation

## Sheet: Table S2
Table S2 Several CapT gene mutations
Strain	Serotype	Gene mutations	Function	SNP/InDel	Position	Annotation/InDel type	Ref base->sample base/InDel seq	AA mutation	Mutation type	Ref genome
GCA_907167105.1	9V	wzy	repeat unit polymerase	InDel	243	D1	T	NA	Frameshift mutation	GCA_001084545.2
GCA_907167105.1	9V	wcjB	putative alpha-1,3-glucuronic acid transferase	InDel	55	D1	A	NA	Frameshift mutation	GCA_001084545.2
GCA_907167115.1	9V	wzx	CPS repeating unit transporter	SNP	1425	Gene	A->G	*->W	Terminator codon mutation, causing the fusion of wzx and wcjC	GCA_001084545.2
GCA_907168135.1	9V	wcjA	putative alpha-1,3-galactosyltransferase	InDel	605	D1	T	NA	Frameshift mutation	GCA_001084545.2
GCA_907168545.1	9V	wcjD	O-acetyltransferase	InDel	200	D1	G	NA	Frameshift mutation	GCA_001084545.2
GCA_907167245.1	13	whaG	putative glycosyl transferase	InDel	91	D1	C	NA	Frameshift mutation	GCA_907168065.1
GCA_901307935.1	14	wze	tyrosine-protein kinase	InDel	30	D1	A	NA	Frameshift mutation	GCA_907166955.1
GCA_901285315.1	14	wchA	undecaprenylphosphate glucosephosphotransferase	SNP	1174	Gene	G->T	E->*	Nonsense mutation	GCA_907166955.1
GCA_901285415.1	14	wchA	undecaprenylphosphate glucosephosphotransferase	InDel	228	I1	T	NA	Frameshift mutation	GCA_907166955.1
GCA_901305845.1	14	wchA	undecaprenylphosphate glucosephosphotransferase	SNP	547	Gene	A->T	K->*	Nonsense mutation	GCA_907166955.1
GCA_907168275.1	14	wchA	undecaprenylphosphate glucosephosphotransferase	InDel	436	I1	A	NA	Frameshift mutation	GCA_907166955.1
GCA_907168005.1	14	wchN	putative glycosyl transferase	InDel	470	D1	G	NA	Frameshift mutation	GCA_907166955.1
GCA_907168735.1	19A	wchQ	putative rhamnosyl transferase	InDel	269	I1	A	NA	Frameshift mutation	GCA_900038685.2

## Sheet: Table S3
Table S3 The performance of Pneumo-Typer in serotyping at serotype and serogroup levels
No.	Recorded serotype	Number	Serotype level			Serogroup level
			Accuracy (%)	Mispredicted total number	Mispredicted serotype, number	Accuracy rate (%)	Mispredicted total number	Recorded serotype and its number
1	1	966	99.9	1	16F,1	99.8965	1	16F,1
2	2	38	100	0		100	0
3	3	544	100	0		100	0
4	4	299	99.67	1	6A,1	99.6656	1	6A,1
5	5	402	99.5	2	35F,2	99.5025	2	35F,2
6	6A	1034	98.45	16	6B,11;6B|23F,1;6C,4	99.96	1	6B|23F,1
7	6B	1246	98.8	15	6A,10;6D,4;6B|6D,1
8	6C	283	98.94	3	6B,2;6B|6C,1
9	6D	13	84.62	2	6B,2
10	7A	1	100	0		100	0
11	7B	30	86.67	4	7C,4
12	7C	110	100	0
13	7F	287	100	0
14	8	210	100	0		100	0
15	9A	15	20	12	9V,12	100	0
16	9L	43	100	0
17	9N	127	86.61	17	9L,17
18	9V	465	99.35	3	9A,3
19	10A	233	100	0		100	0
20	10B	100	93	7	10A,1;10F,6
21	10C	1	100	0
22	10F	26	100	0
23	11A	402	100	0		100	0
24	11B	12	100	0
25	11C	1	100	0
26	11D	1	100	0
27	11F	1	100	0
28	12A	4	0	4	12B,4	99.76	0
29	12B	15	73.33	4	12F,4
30	12F	393	99.24	3	12B,1;12B|12F,1;33F,1			33F,1
31	13	267	100	0		100	0
32	14	1412	100	0		100	0
33	15A	347	98.85	4	34,1;15B|15C,1;6C,1;19A,1	99.57	4	34,1;6C,1;19A,1
34	15B	118	83.05	20	15B|15C,4;15C,15;28F,1			28F,1
35	15C	72	54.17	33	15B,4;15B|15C,29
36	15F	11	63.64	4	15B|15C,2;15C,1;15B,1
37	15B|15C	611	100	0
38	16A	1	100	0		100	0
39	16F	391	100	0
40	17A	2	100	0		100	0
41	17F	154	100	0
42	18A	55	100	0		100	0
43	18B	15	86.67	2	18C,2
44	18C	292	97.26	8	18B,6;18F,2
45	18F	20	100	0
46	19A	1273	99.69	4	19F,1;33F,2;23F,1	99.75	7	33F,2;23F,1
47	19B	70	100	0
48	19C	1	100	0
49	19F	1407	98.15	26	19A,22;21,1;23F,3			21,1;23F,3
50	20	111	100	0		100	0
51	21	200	99.5	1	28F,1	99.5	1	28F,1
52	22A	40	100	0		99.64	1
53	22F	236	99.58	1	19A,1			19A,1
54	23A	225	100	0		99.88	2
55	23B	249	99.6	1	19A,1			19A,1
56	23F	1138	99.91	1	19F,1			19F,1
57	24A	2	100	0		100	0
58	24B	1	100	0
59	24F	19	68.42	6	24B,6
60	25A	3	0	3	25F,3	92.31	2
61	25F	23	91.3	2	6A,1;6B,1			6A,1;6B,1
62	27	8	100	0		100	0	0
63	28A	14	100	0		98.33	1
64	28F	46	95.65	2	28A,2			16F,1
65	29	33	93.94	2	35B,2	93.9394	2	35B,2
66	31	82	100	0		100	0
67	32A	10	0	10	32F,10	100	0
68	32F	9	100	0
69	33A	2	100	0		99.17	2
70	33B	43	100	0
71	33C	12	100	0
72	33D	37	83.78	6	33B,6
73	33F	147	98.64	2	6C,1;12F,1			6C,1;12F,1
74	34	327	100	0		100	0
75	35A	46	100	0		99.82	1
76	35B	306	98.37	5	35D,4;6C,1			6C,1
77	35C	54	31.48	37	35B,26;35A,10;35F,1
78	35D	16	100	0
79	35F	147	99.32	1	35B,1
80	36	2	100	0		100	0
81	37	19	100	0		100	0
82	38	147	100	0		100	0
83	39	20	100	0		100	0
84	40	26	100	0		100	0
85	41A	3	100	0		100	0
86	41F	2	100	0
87	42	2	100	0		100	0
88	43	1	100	0		100	0
89	44	1	0	1	12B,1	0	1	12B,1
90	45	13	100	0		100	0
91	46	24	100	0		100	0
92	47A	1	100	0		100	0
93	47F	1	100	0
94	48	14	100	0		100	0
Total		17683	98.44	276		99.84	29

## Sheet: Table S4
Table S4 The serotype prediction for each genome by Pneumo-Typer, PneumoKITy, and PfaSTer
Strain	Recorded serotype	Serotype by Pneumo-Typer	Pneumo-Typer R/W	Serotype by PneumoKITy	PneumoKITy R/W	Serotype by PfaSTer	PfaSTer R/W
GCA_000832325.1	35F	35F	Right	35F	Right	35F	Right
GCA_000941155.1	16F	16F	Right	16F	Right	16F	Right
GCA_000942775.1	11A	11A	Right	NA	Wrong	11A	Right
GCA_000946895.1	19B	19B	Right	19B	Right	19F	Wrong
GCA_001082985.2	3	3	Right	3	Right	3	Right
GCA_001083025.1	23F	23F	Right	23F	Right	23F	Right
GCA_001083045.2	10A	10A	Right	10A	Right	10A	Right
GCA_001083125.1	19F	19F	Right	19F	Right	19F	Right
GCA_001083145.1	13	13	Right	13	Right	13	Right
GCA_001083225.1	06B	06B	Right	06|06E	Wrong	06E	Wrong
GCA_001083245.1	23F	23F	Right	23F	Right	23F	Right
GCA_001083365.1	15B	15B	Right	15B|15C	Wrong	15B	Right
GCA_001083405.2	23A	23A	Right	23A	Right	23A	Right
GCA_001083425.1	19A	19A	Right	19A	Right	19A	Right
GCA_001083445.1	06C	06C	Right	06A|06B|06C|06D	Wrong	06C	Right
GCA_001083465.1	8	8	Right	8	Right	8	Right
GCA_001083485.1	06B	06B	Right	06|06E	Wrong	06E	Wrong
GCA_001083505.1	06A	06A	Right	06A|06B	Wrong	06A	Right
GCA_001083525.1	23F	23F	Right	23F	Right	23F	Right
GCA_001083585.1	06A	06A	Right	06A|06B	Wrong	06A	Right
GCA_001083685.1	3	3	Right	3	Right	3	Right
GCA_001083705.3	09A	09V	Wrong	09A|09V	Wrong	09V	Wrong
GCA_001083725.1	10F	10F	Right	10F	Right	10F	Right
GCA_001083905.1	06A	06A	Right	06A|06B	Wrong	06A	Right
GCA_001083945.1	10A	10A	Right	10A	Right	10A	Right
GCA_001083965.1	06A	06A	Right	06A|06B	Wrong	06A	Right
GCA_001083985.1	23F	23F	Right	23F	Right	23F	Right
GCA_001084105.1	15C	15B|15C	Wrong	15B|15C	Wrong	15C	Right
GCA_001084145.1	23F	23F	Right	23F	Right	23F	Right
GCA_001084265.1	06B	06B	Right	06|06E	Wrong	06E	Wrong
GCA_001084285.1	23B	23B	Right	23B	Right	23B1	Wrong
GCA_001084305.1	23A	23A	Right	23A	Right	23A	Right
GCA_001084365.1	14	14	Right	14	Right	14	Right
GCA_001084405.1	06B	06B	Right	06|06E	Wrong	06E	Wrong
GCA_001084425.2	15B|15C	15B|15C	Right	15B|15C	Right	15C	Right
GCA_001084465.1	32A	32F	Wrong	32F|32A	Wrong	27	Wrong
GCA_001084485.1	19A	19A	Right	19A	Right	19A	Right
GCA_001084505.2	19F	19F	Right	19F	Right	19F	Right
GCA_001084545.2	09V	09V	Right	09A|09V	Wrong	09V	Right
GCA_001084625.1	18F	18F	Right	18B|18C|18F	Wrong	18F	Right
GCA_001084665.1	15A	15A	Right	15A	Right	15A	Right
GCA_001084705.2	23F	23F	Right	23F	Right	23F	Right
GCA_001084725.2	11A	11A	Right	11A|11D	Wrong	11A	Right
GCA_001084765.2	19F	19F	Right	19F	Right	19F	Right
GCA_001084785.2	16F	16F	Right	16F	Right	16F	Right
GCA_001084865.2	06A	06A	Right	06A|06B	Wrong	06A	Right
GCA_001084905.2	23B	23B	Right	23B	Right	23B1	Wrong
GCA_001084925.1	19F	19F	Right	19F	Right	19F	Right
GCA_001085005.1	06C	06C	Right	06A|06B|06C|06D	Wrong	06C	Right
GCA_001085045.1	19F	19F	Right	19F	Right	19F	Right
GCA_001085065.1	19F	19F	Right	19F	Right	19F	Right
GCA_001085085.1	10B	10F	Wrong	10F	Wrong	10F	Wrong
GCA_001085105.1	35C	35B	Wrong	35B|35D	Wrong	35B	Wrong
GCA_001085165.1	06B	06B	Right	06|06E	Wrong	06E	Wrong
GCA_001085285.1	06B	06B	Right	06|06E	Wrong	06E	Wrong
GCA_001085305.1	10A	10A	Right	10A	Right	10A	Right
GCA_001085345.1	14	14	Right	14	Right	14	Right
GCA_001085385.1	14	14	Right	14	Right	14	Right
GCA_001085405.1	33F	33F	Right	NA	Wrong	35D	Wrong
GCA_001085425.1	19F	19F	Right	19F	Right	19F	Right
GCA_001085445.2	19F	19F	Right	19F	Right	19F	Right
GCA_001085465.1	23F	23F	Right	23F	Right	23F	Right
GCA_001085545.1	06B	06B	Right	06|06E	Wrong	06E	Wrong
GCA_001085565.1	06A	06A	Right	06A|06B	Wrong	06A	Right
GCA_001085585.1	19F	19F	Right	19F	Right	19F	Right
GCA_001085645.2	06B	06B	Right	06|06E	Wrong	06E	Wrong
GCA_001085665.1	14	14	Right	14	Right	14	Right
GCA_001085705.1	10A	10A	Right	10A	Right	10A	Right
GCA_001085805.1	35F	35F	Right	35F	Right	35F	Right
GCA_001085825.1	19F	19F	Right	19F	Right	19F	Right
GCA_001085885.1	06B	06B	Right	06|06E	Wrong	06E	Wrong
GCA_001085945.1	10B	10B	Right	10B	Right	10B	Right
GCA_001085965.2	15A	15A	Right	15A	Right	15A	Right
GCA_001086005.3	15B|15C	15B|15C	Right	15B|15C	Right	15C	Right
GCA_001086065.1	19F	19F	Right	19F	Right	19F	Right
GCA_001086085.1	06B	06B	Right	06|06E	Wrong	06E	Wrong
GCA_001086125.1	06A	06A	Right	06A|06B	Wrong	06A	Right
GCA_001086165.2	07F	07F	Right	07F|07A	Wrong	07F	Right
GCA_001086205.1	06B	06B	Right	06|06E	Wrong	06E	Wrong
GCA_001086225.1	15B	15C	Wrong	15B|15C	Wrong	15C	Wrong
GCA_001086245.1	23F	23F	Right	23F	Right	23F	Right
GCA_001086385.1	19F	19F	Right	19F	Right	19F	Right
GCA_001086445.1	14	14	Right	14	Right	14	Right
GCA_001086465.1	23F	23F	Right	23F	Right	23F	Right
GCA_001086545.1	19B	19B	Right	19B	Right	31	Wrong
GCA_001086565.1	06C	06C	Right	06A|06B|06C|06D	Wrong	06C	Right
GCA_001086585.2	07F	07F	Right	07F|07A	Wrong	07F	Right
GCA_001086605.1	23F	23F	Right	23F	Right	23F	Right
GCA_001086865.1	10A	10A	Right	10A	Right	10A	Right
GCA_001086905.1	06B	06B	Right	06|06E	Wrong	06E	Wrong
GCA_001086925.1	13	13	Right	13	Right	13	Right
GCA_001086965.1	15B	15B	Right	15B|15C	Wrong	15B	Right
GCA_001087025.1	19F	19F	Right	19F	Right	19F	Right
GCA_001087085.2	18C	18C	Right	18C|18B	Wrong	18C	Right
GCA_001087125.1	19F	19F	Right	19F	Right	19F	Right
GCA_001087145.3	09A	09V	Wrong	09A|09V	Wrong	09V	Wrong
GCA_001087185.1	15B	15B	Right	15B|15C	Wrong	15B	Right
GCA_001087285.1	19F	19F	Right	19F	Right	19F	Right
GCA_001087305.1	15C	15C	Right	15B|15C	Wrong	15C	Right
GCA_001087385.1	06B	06B	Right	06|06E	Wrong	06E	Wrong
GCA_001087405.1	35C	35B	Wrong	35B|35D	Wrong	35B	Wrong
GCA_001087445.1	06B	06B	Right	06|06E	Wrong	06E	Wrong
GCA_001087465.1	06B	06B	Right	06|06E	Wrong	06E	Wrong
GCA_001087485.1	11A	11A	Right	NA	Wrong	11A	Right
GCA_001087505.2	15A	15A	Right	15A	Right	15A	Right
GCA_001087525.2	19A	19A	Right	19A	Right	19A	Right
GCA_001087565.1	14	14	Right	14	Right	14	Right
GCA_001087585.1	15A	15A	Right	15A	Right	15A	Right
GCA_001087705.2	06C	06C	Right	06C|06D	Wrong	06C	Right
GCA_001087745.2	3	3	Right	3	Right	3	Right
GCA_001087785.1	33F	33F	Right	NA	Wrong	35D	Wrong
GCA_001087825.1	23F	23F	Right	23F	Right	23F	Right
GCA_001087865.2	11A	11A	Right	11A|11D	Wrong	11A	Right
GCA_001087945.1	19F	19F	Right	19F	Right	19F	Right
GCA_001087965.1	11A	11A	Right	NA	Wrong	11A	Right
GCA_001088025.1	23F	23F	Right	23F	Right	23F	Right
GCA_001088125.1	19F	19F	Right	19F	Right	19F	Right
GCA_001088165.1	14	14	Right	14	Right	14	Right
GCA_001088185.2	06A	06A	Right	06A|06B	Wrong	06A	Right
GCA_001088205.2	23B	23B	Right	23B	Right	23B	Right
GCA_001088265.1	19F	19F	Right	19F	Right	19F	Right
GCA_001088385.1	06B	06B	Right	06|06E	Wrong	06E	Wrong
GCA_001088445.2	33F	33F	Right	33F|33A	Wrong	33F	Right
GCA_001088525.2	11A	11A	Right	11A|11D	Wrong	11A	Right
GCA_001088565.1	16F	16F	Right	16F	Right	16F	Right
GCA_001088625.1	3	3	Right	3	Right	3	Right
GCA_001088645.2	15F	15B|15C	Wrong	15B|15C	Wrong	15C	Wrong
GCA_001088705.1	19A	19A	Right	19A	Right	19A	Right
GCA_001088725.2	06C	06C	Right	06C|06D	Wrong	06C	Right
GCA_001088745.2	06C	06C	Right	06A|06B|06C|06D	Wrong	06C	Right
GCA_001088865.1	19A	19A	Right	19A	Right	19A	Right
GCA_001088885.1	33B	33B	Right	33B|33D	Wrong	33B	Right
GCA_001088905.1	19F	19F	Right	19F	Right	19F	Right
GCA_001088945.1	19F	19F	Right	19F	Right	19F	Right
GCA_001088985.2	11A	11A	Right	11A|11D	Wrong	11A	Right
GCA_001089025.1	11A	11A	Right	NA	Wrong	11A	Right
GCA_001089125.1	07F	07F	Right	07F|07A	Wrong	07F	Right
GCA_001089165.1	4	4	Right	4	Right	4	Right
GCA_001089185.1	06B	06B	Right	06|06E	Wrong	06E	Wrong
GCA_001089205.1	06A	06A	Right	06A|06B	Wrong	06A	Right
GCA_001089245.2	15B|15C	15B	Right	15B|15C	Right	15B	Right
GCA_001089285.2	11A	11A	Right	11A|11D	Wrong	11A	Right
GCA_001089405.1	33B	33B	Right	33B|33D	Wrong	33B	Right
GCA_001089425.1	14	14	Right	14	Right	14	Right
GCA_001089445.2	19A	19A	Right	19A	Right	19A	Right
GCA_001089485.1	15B	15B	Right	15B|15C	Wrong	15B	Right
GCA_001089505.1	33B	33B	Right	33B|33D	Wrong	33B	Right
GCA_001089585.1	23F	23F	Right	23F	Right	23F	Right
GCA_001089605.1	15C	15B|15C	Wrong	15B|15C	Wrong	15C	Right
GCA_001089685.1	3	3	Right	3	Right	3	Right
GCA_001089705.1	21	21	Right	21	Right	21	Right
GCA_001089725.2	23A	23A	Right	23A	Right	23A	Right
GCA_001089745.1	06B	06B	Right	06|06E	Wrong	06E	Wrong
GCA_001089765.1	19F	19F	Right	19F	Right	19F	Right
GCA_001089785.1	19F	19F	Right	19F	Right	19F	Right
GCA_001089825.2	19F	19F	Right	19F	Right	19F	Right
GCA_001089885.2	15A	15A	Right	15A	Right	15A	Right
GCA_001089945.1	37	37	Right	37	Right	37	Right
GCA_001089965.1	34	34	Right	34	Right	34	Right
GCA_001090005.1	15B	15C	Wrong	15B|15C	Wrong	15C	Wrong
GCA_001090045.1	06C	06C	Right	06A|06B|06C|06D	Wrong	06C	Right
GCA_001090065.1	15C	15B|15C	Wrong	15B|15C	Wrong	15C	Right
GCA_001090125.1	19A	19A	Right	19A	Right	19A	Right
GCA_001090145.1	06B	06B	Right	06|06E	Wrong	06E	Wrong
GCA_001090205.1	23F	23F	Right	23F	Right	23F	Right
GCA_001090345.3	19A	19A	Right	19A	Right	19A	Right
GCA_001090425.2	15B|15C	15B	Right	15B|15C	Right	15B	Right
GCA_001090465.1	07B	07C	Wrong	07C	Wrong	07C	Wrong
GCA_001090525.1	06A	06A	Right	06A|06B	Wrong	06A	Right
GCA_001090545.1	19F	19F	Right	19F	Right	19F	Right
GCA_001090565.2	16F	16F	Right	16F	Right	16F	Right
GCA_001090625.1	15B	15B	Right	15B|15C	Wrong	15B	Right
GCA_001090645.1	14	14	Right	14	Right	14	Right
GCA_001090685.1	8	8	Right	8	Right	8	Right
GCA_001090705.1	06B	06B	Right	06|06E	Wrong	06E	Wrong
GCA_001090765.1	3	3	Right	3	Right	3	Right
GCA_001090785.1	19F	19F	Right	19F	Right	19F	Right
GCA_001090805.1	19F	19F	Right	19F	Right	19F	Right
GCA_001090825.2	11A	11A	Right	11A|11D	Wrong	11A	Right
GCA_001090845.1	19F	19F	Right	19F	Right	19F	Right
GCA_001090865.2	11A	11A	Right	11A|11D	Wrong	11A	Right
GCA_001090945.1	23F	23F	Right	23F	Right	23F	Right
GCA_001090985.1	19F	19F	Right	19F	Right	19F	Right
GCA_001091025.1	06A	06A	Right	06A|06B	Wrong	06A	Right
GCA_001091045.1	34	34	Right	34	Right	34	Right
GCA_001091085.2	18C	18C	Right	18C|18B	Wrong	18C	Right
GCA_001091145.2	06C	06C	Right	06C|06D	Wrong	06C	Right
GCA_001091165.1	23F	23F	Right	23F	Right	23F	Right
GCA_001091185.1	15B	15B	Right	15B|15C	Wrong	15B	Right
GCA_001091265.2	11A	11A	Right	11A|11D	Wrong	11A	Right
GCA_001091285.1	34	34	Right	34	Right	34	Right
GCA_001091305.1	23F	23F	Right	23F	Right	23F	Right
GCA_001091325.1	23F	23F	Right	23F	Right	23F	Right
GCA_001091345.1	33C	33C	Right	33C	Right	33C	Right
GCA_001091365.1	23F	23F	Right	23F	Right	23F	Right
GCA_001091465.1	23F	23F	Right	23F	Right	23F	Right
GCA_001091505.1	19F	19F	Right	19F	Right	19F	Right
GCA_001091545.1	18C	18C	Right	18C|18B	Wrong	18C	Right
GCA_001091585.1	19F	19F	Right	19F	Right	19F	Right
GCA_001091625.1	19F	19F	Right	19F	Right	19F	Right
GCA_001091645.1	19F	19F	Right	19F	Right	19F	Right
GCA_001091705.1	19A	19A	Right	19A	Right	19A	Right
GCA_001091765.1	06B	06B	Right	06|06E	Wrong	06E	Wrong
GCA_001091805.1	18F	18F	Right	18F	Right	18F	Right
GCA_001091825.1	22F	22F	Right	22F	Right	22F	Right
GCA_001091865.1	23F	23F	Right	23F	Right	23F	Right
GCA_001091925.2	19F	19F	Right	19F	Right	19F	Right
GCA_001091945.1	19B	19B	Right	19B	Right	19F	Wrong
GCA_001092025.1	15B	15B	Right	15B|15C	Wrong	15B	Right
GCA_001092045.1	19F	19F	Right	19F	Right	19F	Right
GCA_001092065.1	14	14	Right	14	Right	14	Right
GCA_001092085.1	14	14	Right	14	Right	14	Right
GCA_001092125.1	23F	23F	Right	23F	Right	23F	Right
GCA_001092185.1	09V	09V	Right	09A|09V	Wrong	09V	Right
GCA_001092285.1	3	3	Right	3	Right	3	Right
GCA_001092325.1	23F	23F	Right	23F	Right	23F	Right
GCA_001092345.1	14	14	Right	14	Right	14	Right
GCA_001092445.1	23F	23F	Right	23F	Right	23F	Right
GCA_001092525.2	06C	06C	Right	06C|06D	Wrong	06C	Right
GCA_001092545.1	33C	33C	Right	33C	Right	33C	Right
GCA_001092665.1	10F	10F	Right	10F	Right	10F	Right
GCA_001092705.2	11A	11A	Right	11A|11D	Wrong	11A	Right
GCA_001092725.1	19F	19F	Right	19F	Right	19F	Right
GCA_001092805.1	15A	15A	Right	15A	Right	15A	Right
GCA_001092825.1	33B	33B	Right	33B|33D	Wrong	33B	Right
GCA_001092845.1	23B	23B	Right	23B	Right	23B1	Wrong
GCA_001092885.1	19F	19F	Right	19F	Right	19F	Right
GCA_001092905.1	4	06A	Wrong	06A|06B	Wrong	06B	Wrong
GCA_001092925.1	06B	06B	Right	06|06E	Wrong	06E	Wrong
GCA_001092965.2	34	34	Right	34	Right	34	Right
GCA_001092985.1	06B	06B	Right	06|06E	Wrong	06E	Wrong
GCA_001093005.2	15B|15C	15B|15C	Right	15B|15C	Right	15C	Right
GCA_001093045.2	06C	06C	Right	06C|06D	Wrong	06C	Right
GCA_001093065.2	06A	06A	Right	06A|06B	Wrong	06A	Right
GCA_001093085.1	13	13	Right	13	Right	13	Right
GCA_001093125.2	06C	06C	Right	06C|06D	Wrong	06C	Right
GCA_001093145.2	11A	11A	Right	11A|11D	Wrong	11A	Right
GCA_001093165.2	19A	19A	Right	19A	Right	19A	Right
GCA_001093185.1	34	34	Right	34	Right	34	Right
GCA_001093205.1	06B	06B	Right	06|06E	Wrong	06E	Wrong
GCA_001093285.1	06A	06A	Right	06A|06B	Wrong	06A	Right
GCA_001093305.1	06A	06A	Right	06A|06B	Wrong	06A	Right
GCA_001093325.1	19F	19F	Right	19F	Right	19F	Right
GCA_001093345.2	06C	06C	Right	06C|06D	Wrong	06C	Right
GCA_001093365.2	06C	06C	Right	06C|06D	Wrong	06C	Right
GCA_001093445.1	19A	19A	Right	19A	Right	19A	Right
GCA_001093465.1	19A	19A	Right	19A	Right	19A	Right
GCA_001093485.1	19F	19F	Right	19F	Right	19F	Right
GCA_001093645.1	15C	15B	Wrong	15B|15C	Wrong	15B	Wrong
GCA_001093685.2	06C	06C	Right	06C|06D	Wrong	06C	Right
GCA_001093705.1	23A	23A	Right	23A	Right	23A	Right
GCA_001093725.1	34	34	Right	34	Right	34	Right
GCA_001093765.1	06B	06B	Right	06|06E	Wrong	06E	Wrong
GCA_001093785.1	19F	19F	Right	19F	Right	19F	Right
GCA_001093845.1	06A	06A	Right	06A|06B	Wrong	06A	Right
GCA_001093925.1	23F	23F	Right	23F	Right	23F	Right
GCA_001093945.1	23F	23F	Right	23F	Right	23F	Right
GCA_001093965.1	3	3	Right	3	Right	3	Right
GCA_001094045.2	23B	23B	Right	23B	Right	23B	Right
GCA_001094125.1	19F	19F	Right	19F	Right	19F	Right
GCA_001094165.1	06A	06A	Right	06A|06B	Wrong	06A	Right
GCA_001094185.1	10B	10B	Right	10B	Right	10B	Right
GCA_001094225.2	35F	35F	Right	35F	Right	35F	Right
GCA_001094305.1	19F	19F	Right	19F	Right	19F	Right
GCA_001094325.1	18C	18C	Right	18C|18B	Wrong	18C	Right
GCA_001094345.1	19F	19F	Right	19F	Right	19F	Right
GCA_001094385.2	33F	33F	Right	33F|33A	Wrong	33F	Right
GCA_001094545.1	19A	19A	Right	19A	Right	19A	Right
GCA_001094585.1	19F	19F	Right	19F	Right	19F	Right
GCA_001094685.1	35B	35B	Right	35B|35D	Wrong	35B	Right
GCA_001094705.1	15A	15A	Right	15A	Right	15A	Right
GCA_001094725.1	10A	10A	Right	10A	Right	10A	Right
GCA_001094805.1	06C	06C	Right	06A|06B|06C|06D	Wrong	06C	Right
GCA_001094825.1	13	13	Right	13	Right	13	Right
GCA_001094845.1	06A	06A	Right	06A|06B	Wrong	06A	Right
GCA_001094885.1	06A	06A	Right	06A|06B	Wrong	06A	Right
GCA_001094905.1	06B	06B	Right	06|06E	Wrong	06E	Wrong
GCA_001094945.1	06B	06B	Right	06|06E	Wrong	06E	Wrong
GCA_001094965.2	09V	09V	Right	09A|09V	Wrong	09V	Right
GCA_001094985.1	3	3	Right	3	Right	3	Right
GCA_001095005.1	06A	06A	Right	06A|06B	Wrong	06A	Right
GCA_001095065.2	06A	06A	Right	06A|06B	Wrong	06A	Right
GCA_001095105.2	09N	09N	Right	09N|09L	Wrong	09N	Right
GCA_001095165.1	06A	06A	Right	06A|06B	Wrong	06A	Right
GCA_001095185.1	19F	19F	Right	19F	Right	19F	Right
GCA_001095205.1	06B	06B	Right	06|06E	Wrong	06E	Wrong
GCA_001095245.1	19A	19A	Right	19A	Right	19A	Right
GCA_001095285.1	19F	19F	Right	19F	Right	19F	Right
GCA_001095365.1	21	21	Right	21	Right	21	Right
GCA_001095385.1	19F	19F	Right	19F	Right	19F	Right
GCA_001095405.2	06A	06A	Right	06A|06B	Wrong	06A	Right
GCA_001095445.1	35F	35F	Right	35F	Right	35F	Right
GCA_001095485.2	06B	06B	Right	06|06E	Wrong	06E	Wrong
GCA_001095545.1	35F	35F	Right	35F	Right	35F	Right
GCA_001095565.1	06C	06C	Right	06A|06B|06C|06D	Wrong	06C	Right
GCA_001095625.2	15B|15C	15B	Right	15B|15C	Right	15B	Right
GCA_001095645.2	15B|15C	15B|15C	Right	15B|15C	Right	15C	Right
GCA_001095745.2	11A	11A	Right	11A|11D	Wrong	11A	Right
GCA_001095785.1	13	13	Right	13	Right	13	Right
GCA_001095805.1	4	4	Right	4	Right	4	Right
GCA_001095825.1	06B	06B	Right	06|06E	Wrong	06E	Wrong
GCA_001095845.1	06B	06B	Right	06|06E	Wrong	06E	Wrong
GCA_001095865.2	19A	19A	Right	19A	Right	19A	Right
GCA_001095945.1	19A	19A	Right	19A	Right	19A	Right
GCA_001095985.2	35B	35B	Right	35B|35D	Wrong	35B	Right
GCA_001096005.2	35B	35B	Right	35B|35D	Wrong	35B	Right
GCA_001096045.1	06B	06B	Right	06|06E	Wrong	06E	Wrong
GCA_001096085.2	19A	19A	Right	19A	Right	19A	Right
GCA_001096125.1	06A	06A	Right	06A|06B	Wrong	06A	Right
GCA_001096205.1	13	13	Right	13	Right	13	Right
GCA_001096265.1	06B	06B	Right	06|06E	Wrong	06E	Wrong
GCA_001096305.1	3	3	Right	3	Right	3	Right
GCA_001096425.1	10F	10F	Right	10F	Right	10F	Right
GCA_001096445.1	06B	06B	Right	06|06E	Wrong	06E	Wrong
GCA_001096465.1	14	14	Right	14	Right	14	Right
GCA_001096525.1	19F	19F	Right	19F	Right	19F	Right
GCA_001096545.1	19F	19F	Right	19F	Right	19F	Right
GCA_001096605.1	15A	15A	Right	15A	Right	15A	Right
GCA_001096625.1	3	3	Right	3	Right	3	Right
GCA_001096685.2	23A	23A	Right	23A	Right	23A	Right
GCA_001096705.1	34	34	Right	34	Right	34	Right
GCA_001096765.1	06B	06B	Right	06|06E	Wrong	06E	Wrong
GCA_001096825.1	06A	06A	Right	06A|06B	Wrong	06A	Right
GCA_001096865.2	11A	11A	Right	11A|11D	Wrong	11A	Right
GCA_001096885.1	13	13	Right	13	Right	13	Right
GCA_001097025.2	11A	11A	Right	11A|11D	Wrong	11A	Right
GCA_001097105.1	35F	35F	Right	35F	Right	35F	Right
GCA_001097245.1	11A	11A	Right	NA	Wrong	11A	Right
GCA_001097265.1	35C	35C	Right	35A|35C|42	Wrong	35C	Right
GCA_001097345.1	19A	19A	Right	19A	Right	19A	Right
GCA_001097425.1	06C	06C	Right	06A|06B|06C|06D	Wrong	06C	Right
GCA_001097445.1	8	8	Right	8	Right	8	Right
GCA_001097465.1	06C	06C	Right	06A|06B|06C|06D	Wrong	06C	Right
GCA_001097485.1	15B	15B	Right	15B|15C	Wrong	15B	Right
GCA_001097565.1	15B	15B	Right	15B|15C	Wrong	15B	Right
GCA_001097665.1	35F	35F	Right	35F	Right	35F	Right
GCA_001097685.1	06B	06B	Right	06|06E	Wrong	06E	Wrong
GCA_001097765.1	19F	19F	Right	19F	Right	19F	Right
GCA_001097805.1	06B	06B	Right	06|06E	Wrong	06E	Wrong
GCA_001097865.1	38	38	Right	25F|25A|38	Wrong	38	Right
GCA_001097945.1	06A	06A	Right	06A|06B	Wrong	06A	Right
GCA_001097965.1	37	37	Right	37	Right	37	Right
GCA_001097985.2	19A	19A	Right	19A	Right	19A	Right
GCA_001098025.1	19A	19A	Right	19A	Right	19A	Right
GCA_001098045.1	06B	06B	Right	06|06E	Wrong	06E	Wrong
GCA_001098125.1	19F	19F	Right	19F	Right	19F	Right
GCA_001098145.1	19A	19A	Right	19A	Right	19A	Right
GCA_001098185.1	3	3	Right	3	Right	3	Right
GCA_001098205.1	4	4	Right	4	Right	4	Right
GCA_001098265.1	19F	19F	Right	19F	Right	19F	Right
GCA_001098285.1	15A	15A	Right	15A	Right	15A	Right
GCA_001098305.1	06A	06A	Right	06A|06B	Wrong	06A	Right
GCA_001098385.1	16F	16F	Right	16F	Right	16F	Right
GCA_001098425.1	23F	23F	Right	23F	Right	23F	Right
GCA_001098445.2	35F	35F	Right	35F	Right	35F	Right
GCA_001098465.1	06B	06B	Right	06|06E	Wrong	06E	Wrong
GCA_001098505.1	28F	28F	Right	28F|28A	Wrong	28A	Wrong
GCA_001098545.1	17F	17F	Right	17F	Right	17F	Right
GCA_001098565.2	19F	19F	Right	19F	Right	19F	Right
GCA_001098605.1	15B	15C	Wrong	15B|15C	Wrong	15C	Wrong
GCA_001098705.1	19F	19F	Right	19F	Right	19F	Right
GCA_001098725.1	23F	23F	Right	23F	Right	23F	Right
GCA_001098745.1	23F	23F	Right	23F	Right	23F	Right
GCA_001098765.1	06B	06B	Right	06|06E	Wrong	06E	Wrong
GCA_001098785.2	22F	22F	Right	22F	Right	22F	Right
GCA_001098805.1	13	13	Right	13	Right	13	Right
GCA_001098825.1	23F	23F	Right	23F	Right	23F	Right
GCA_001098845.1	14	14	Right	14	Right	14	Right
GCA_001098885.1	1	1	Right	1	Right	1	Right
GCA_001098925.2	14	14	Right	14	Right	14	Right
GCA_001098965.1	28F	28F	Right	28F|28A	Wrong	28A	Wrong
GCA_001098985.1	15B	15B	Right	15B|15C	Wrong	15B	Right
GCA_001099085.1	11A	11A	Right	NA	Wrong	11A	Right
GCA_001099105.1	14	14	Right	14	Right	14	Right
GCA_001099225.1	06B	06B	Right	06|06E	Wrong	06E	Wrong
GCA_001099245.1	06B	06B	Right	06|06E	Wrong	06E	Wrong
GCA_001099325.2	31	31	Right	31	Right	31	Right
GCA_001099345.1	46	46	Right	12A|12B|44|46	Wrong	46	Right
GCA_001099425.1	06A	06A	Right	06A|06B	Wrong	06A	Right
GCA_001099485.1	06B	06B	Right	06|06E	Wrong	06E	Wrong
GCA_001099525.1	19A	19A	Right	19A	Right	19A	Right
GCA_001099565.1	23F	23F	Right	23F	Right	23F	Right
GCA_001099665.1	19F	19F	Right	19F	Right	19F	Right
GCA_001099725.1	06A	06A	Right	06A|06B	Wrong	06A	Right
GCA_001099845.1	19A	19A	Right	19A	Right	19A	Right
GCA_001099885.1	34	34	Right	34	Right	34	Right
GCA_001099905.1	19F	19F	Right	19F	Right	19F	Right
GCA_001100045.1	19F	19F	Right	19F	Right	19F	Right
GCA_001100125.1	18A	18A	Right	18A	Right	18A	Right
GCA_001100145.1	14	14	Right	14	Right	14	Right
GCA_001100185.1	23F	23F	Right	23F	Right	23F	Right
GCA_001100245.2	35F	35F	Right	35F	Right	35F	Right
GCA_001100305.1	19F	19F	Right	19F	Right	19F	Right
GCA_001100345.2	22F	22F	Right	22F	Right	22F	Right
GCA_001100485.2	23F	23F	Right	23F	Right	23F	Right
GCA_001100585.2	23B	23B	Right	23B	Right	23B	Right
GCA_001100645.1	23F	23F	Right	23F	Right	23F	Right
GCA_001100685.1	34	34	Right	34	Right	34	Right
GCA_001100705.1	15A	15A	Right	15A	Right	15A	Right
GCA_001100745.1	3	3	Right	3	Right	3	Right
GCA_001100805.1	1	1	Right	1	Right	1	Right
GCA_001100825.1	14	14	Right	14	Right	14	Right
GCA_001100845.1	19A	19A	Right	19A	Right	19A	Right
GCA_001100865.2	23A	23A	Right	23A	Right	23A	Right
GCA_001100885.1	06B	06B	Right	06|06E	Wrong	06E	Wrong
GCA_001100905.1	06B	06B	Right	06|06E	Wrong	06E	Wrong
GCA_001100925.1	10B	10B	Right	10B	Right	10B	Right
GCA_001100945.1	23F	23F	Right	23F	Right	23F	Right
GCA_001100965.1	19F	19F	Right	19F	Right	19F	Right
GCA_001100985.2	06B	06B	Right	06|06E	Wrong	06E	Wrong
GCA_001101045.1	06A	06A	Right	06A|06B	Wrong	06A	Right
GCA_001101085.1	23F	23F	Right	23F	Right	23F	Right
GCA_001101105.1	5	5	Right	5	Right	5	Right
GCA_001101125.1	23F	23F	Right	23F	Right	23F	Right
GCA_001101145.2	35F	35F	Right	35F	Right	35F	Right
GCA_001101165.1	06A	06A	Right	06A|06B	Wrong	06A	Right
GCA_001101185.1	18B	18B	Right	18C|18B	Wrong	18B	Right
GCA_001101205.2	19F	19F	Right	19F	Right	19F	Right
GCA_001101225.2	19A	19A	Right	19A	Right	19A	Right
GCA_001101245.1	06B	06B	Right	06|06E	Wrong	06E	Wrong
GCA_001101345.2	22F	22F	Right	22F	Right	22F	Right
GCA_001101385.2	14	14	Right	14	Right	14	Right
GCA_001101425.1	10B	10F	Wrong	10F	Wrong	10F	Wrong
GCA_001101465.1	15B	15B	Right	15B|15C	Wrong	15B	Right
GCA_001101485.1	19F	19F	Right	19F	Right	19F	Right
GCA_001101545.2	15B|15C	15C	Right	15B|15C	Right	15C	Right
GCA_001101565.2	11A	11A	Right	11A|11D	Wrong	11A	Right
GCA_001101645.1	23F	23F	Right	23F	Right	23F	Right
GCA_001101685.2	16F	16F	Right	16F	Right	16F	Right
GCA_001101705.1	11A	11A	Right	NA	Wrong	11A	Right
GCA_001101745.1	13	13	Right	13	Right	13	Right
GCA_001101845.1	06B	06B	Right	06|06E	Wrong	06E	Wrong
GCA_001101865.2	22F	22F	Right	22F	Right	22F	Right
GCA_001101885.1	19A	19A	Right	19A	Right	19A	Right
GCA_001101905.1	19A	19A	Right	19A	Right	19A	Right
GCA_001101925.1	19F	19F	Right	19F	Right	19F	Right
GCA_001101945.2	19A	19A	Right	19A	Right	19A	Right
GCA_001101965.2	35B	35D	Wrong	35B|35D	Wrong	35D	Wrong
GCA_001101985.1	32F	32F	Right	32F|32A	Wrong	27	Wrong
GCA_001102005.1	15C	15C	Right	15B|15C	Wrong	15C	Right
GCA_001102045.1	06B	06B	Right	06|06E	Wrong	06E	Wrong
GCA_001102145.1	10B	10F	Wrong	10F	Wrong	10F	Wrong
GCA_001102225.1	19F	19F	Right	19F	Right	19F	Right
GCA_001102305.1	06C	06C	Right	06A|06B|06C|06D	Wrong	06C	Right
GCA_001102345.1	14	14	Right	14	Right	14	Right
GCA_001102365.2	23B	23B	Right	23B	Right	23B	Right
GCA_001102405.1	14	14	Right	14	Right	14	Right
GCA_001102445.2	38	38	Right	38	Right	38	Right
GCA_001102505.1	15A	15A	Right	15A	Right	15A	Right
GCA_001102525.1	20	20	Right	20	Right	20	Right
GCA_001102585.2	11A	11A	Right	11A|11D	Wrong	11A	Right
GCA_001102625.1	4	4	Right	4	Right	4	Right
GCA_001102645.1	06B	06B	Right	06|06E	Wrong	06E	Wrong
GCA_001102765.1	13	13	Right	13	Right	13	Right
GCA_001102785.1	14	14	Right	14	Right	14	Right
GCA_001102805.2	11A	11A	Right	11A|11D	Wrong	11A	Right
GCA_001102925.1	4	4	Right	4	Right	4	Right
GCA_001103065.1	17F	17F	Right	17F	Right	17F	Right
GCA_001103085.1	06B	06B	Right	06|06E	Wrong	06E	Wrong
GCA_001103105.1	06C	06C	Right	06A|06B|06C|06D	Wrong	06C	Right
GCA_001103225.1	14	14	Right	14	Right	14	Right
GCA_001103245.2	19A	19A	Right	19A	Right	19A	Right
GCA_001103365.1	23F	23F	Right	23F	Right	23F	Right
GCA_001103425.1	15C	15C	Right	15B|15C	Wrong	15C	Right
GCA_001103445.2	06C	06C	Right	06C|06D	Wrong	06C	Right
GCA_001103465.1	8	8	Right	8	Right	8	Right
GCA_001103545.1	23F	23F	Right	23F	Right	23F	Right
GCA_001103605.1	35F	35F	Right	35F	Right	35F	Right
GCA_001103685.1	17F	17F	Right	17F	Right	17F	Right
GCA_001103705.1	06B	06B	Right	06|06E	Wrong	06E	Wrong
GCA_001103725.1	23F	23F	Right	23F	Right	23F	Right
GCA_001103765.2	15A	15A	Right	15A	Right	15A	Right
GCA_001103785.1	07B	07C	Wrong	07C	Wrong	07C	Wrong
GCA_001103865.2	19A	19A	Right	19A	Right	19A	Right
GCA_001103965.1	19F	19F	Right	19F	Right	19F	Right
GCA_001104025.2	35B	35B	Right	35B|35D	Wrong	35B	Right
GCA_001104105.1	23F	23F	Right	23F	Right	23F	Right
GCA_001104225.1	18C	18C	Right	18C|18B	Wrong	18C	Right
GCA_001104245.1	21	21	Right	21	Right	21	Right
GCA_001104285.1	15B	15B	Right	15B|15C	Wrong	15B	Right
GCA_001104305.1	23F	23F	Right	23F	Right	23F	Right
GCA_001104325.1	19A	19A	Right	19A	Right	19A	Right
GCA_001104405.2	11A	11A	Right	11A|11D	Wrong	11A	Right
GCA_001104585.2	3	3	Right	3	Right	3	Right
GCA_001104605.2	31	31	Right	31	Right	31	Right
GCA_001104625.1	19F	19F	Right	19F	Right	19F	Right
GCA_001104725.1	23F	23F	Right	23F	Right	23F	Right
GCA_001104765.1	3	3	Right	3	Right	3	Right
GCA_001104785.1	35C	35B	Wrong	35B|35D	Wrong	35B	Wrong
GCA_001104805.2	11A	11A	Right	11A|11D	Wrong	11A	Right
GCA_001104825.1	19F	19F	Right	19F	Right	19F	Right
GCA_001104945.2	19A	19A	Right	19A	Right	19A	Right
GCA_001104985.1	23F	23F	Right	23F	Right	23F	Right
GCA_001105005.2	15B|15C	15B	Right	15B|15C	Right	15B	Right
GCA_001105085.2	15A	15A	Right	15A	Right	15A	Right
GCA_001105105.1	06B	06B	Right	06|06E	Wrong	06E	Wrong
GCA_001105125.1	3	3	Right	3	Right	3	Right
GCA_001105165.1	09V	09V	Right	09A|09V	Wrong	09V	Right
GCA_001105185.1	34	34	Right	34	Right	34	Right
GCA_001105245.2	19A	19A	Right	19A	Right	19A	Right
GCA_001105285.2	35B	35B	Right	35B|35D	Wrong	35B	Right
GCA_001105325.1	09V	09V	Right	09A|09V	Wrong	09V	Right
GCA_001105385.1	14	14	Right	14	Right	14	Right
GCA_001105405.1	06A	06A	Right	06A|06B	Wrong	06A	Right
GCA_001105425.1	06A	06A	Right	06A|06B	Wrong	06A	Right
GCA_001105445.1	06A	06A	Right	06A|06B	Wrong	06A	Right
GCA_001105465.1	12F	12F	Right	12F	Right	12F	Right
GCA_001105505.2	35F	35F	Right	35F	Right	35F	Right
GCA_001105545.1	14	14	Right	14	Right	14	Right
GCA_001105565.2	35F	35F	Right	35F	Right	35F	Right
GCA_001105585.1	19F	19F	Right	19F	Right	19F	Right
GCA_001105605.2	15A	15A	Right	15A	Right	15A	Right
GCA_001105665.2	10A	10A	Right	10A	Right	10A	Right
GCA_001105705.1	19F	19F	Right	19F	Right	19F	Right
GCA_001105725.1	10B	10B	Right	10B	Right	10B	Right
GCA_001105785.2	23A	23A	Right	23A	Right	23A	Right
GCA_001105865.1	23F	23F	Right	23F	Right	23F	Right
GCA_001105905.2	11A	11A	Right	11A|11D	Wrong	11A	Right
GCA_001105965.1	15C	15C	Right	15B|15C	Wrong	15C	Right
GCA_001106005.1	16F	16F	Right	16F	Right	16F	Right
GCA_001106025.1	14	14	Right	14	Right	14	Right
GCA_001106125.1	14	14	Right	14	Right	14	Right
GCA_001106165.2	33F	33F	Right	33F|33A	Wrong	33F	Right
GCA_001106185.1	14	14	Right	14	Right	14	Right
GCA_001106245.1	16F	16F	Right	16F	Right	16F	Right
GCA_001106285.1	33C	33C	Right	33C	Right	33C	Right
GCA_001106345.1	06B	06B	Right	06|06E	Wrong	06E	Wrong
GCA_001106405.1	23F	23F	Right	23F	Right	23F	Right
GCA_001106425.1	19F	19F	Right	19F	Right	19F	Right
GCA_001106445.1	33B	33B	Right	33B|33D	Wrong	33B	Right
GCA_001106465.1	19F	19F	Right	19F	Right	19F	Right
GCA_001106505.1	06B	06B	Right	06|06E	Wrong	06E	Wrong
GCA_001106565.1	14	14	Right	14	Right	14	Right
GCA_001106585.1	19A	19A	Right	19A	Right	19A	Right
GCA_001106605.1	18C	18C	Right	18C|18B	Wrong	18C	Right
GCA_001106685.1	19F	19F	Right	19F	Right	19F	Right
GCA_001106705.1	19F	19F	Right	19F	Right	19F	Right
GCA_001106725.1	19F	19F	Right	19F	Right	19F	Right
GCA_001106805.1	3	3	Right	3	Right	3	Right
GCA_001106845.1	06B	06B	Right	06|06E	Wrong	06E	Wrong
GCA_001106865.2	22F	22F	Right	22F	Right	22F	Right
GCA_001106885.1	06A	06A	Right	06A|06B	Wrong	06A	Right
GCA_001106905.1	33C	33C	Right	33C	Right	33C	Right
GCA_001106925.1	06C	06C	Right	06A|06B|06C|06D	Wrong	06C	Right
GCA_001106945.1	19F	19F	Right	19F	Right	19F	Right
GCA_001106965.1	15A	15A	Right	15A	Right	15A	Right
GCA_001107005.1	06B	06B	Right	06|06E	Wrong	06E	Wrong
GCA_001107085.1	23F	23F	Right	23F	Right	23F	Right
GCA_001107125.1	06B	06B	Right	06|06E	Wrong	06E	Wrong
GCA_001107165.1	06B	06B	Right	06|06E	Wrong	06E	Wrong
GCA_001107305.2	06A	06A	Right	06A|06B	Wrong	06A	Right
GCA_001107325.1	19F	19F	Right	19F	Right	19F	Right
GCA_001107385.1	15C	15C	Right	15B|15C	Wrong	15C	Right
GCA_001107445.1	14	14	Right	14	Right	14	Right
GCA_001107465.1	19F	19F	Right	19F	Right	19F	Right
GCA_001107485.1	23A	23A	Right	23A	Right	23A	Right
GCA_001107525.1	32F	32F	Right	32F|32A	Wrong	27	Wrong
GCA_001107565.1	3	3	Right	3	Right	3	Right
GCA_001107625.1	5	5	Right	5	Right	5	Right
GCA_001107685.1	15A	15A	Right	15A	Right	15A	Right
GCA_001107725.1	3	3	Right	3	Right	3	Right
GCA_001107765.1	19F	19F	Right	19F	Right	19F	Right
GCA_001107785.2	15A	15A	Right	15A	Right	15A	Right
GCA_001107825.1	18C	18C	Right	18C|18B	Wrong	18C	Right
GCA_001107865.2	35B	35B	Right	35B|35D	Wrong	35B	Right
GCA_001107905.1	16F	16F	Right	16F	Right	16F	Right
GCA_001107965.1	06A	06A	Right	06A|06B	Wrong	06A	Right
GCA_001107985.1	15A	15A	Right	15A	Right	15A	Right
GCA_001108045.1	06B	06B	Right	06|06E	Wrong	06E	Wrong
GCA_001108065.1	18C	18C	Right	18C|18B	Wrong	18C	Right
GCA_001108085.1	14	14	Right	14	Right	14	Right
GCA_001108105.1	34	34	Right	34	Right	34	Right
GCA_001108145.1	14	14	Right	14	Right	14	Right
GCA_001108165.1	15A	15A	Right	15A	Right	15A	Right
GCA_001108205.1	11A	11A	Right	NA	Wrong	11A	Right
GCA_001108225.1	3	3	Right	3	Right	3	Right
GCA_001108245.1	06B	06B	Right	06|06E	Wrong	06E	Wrong
GCA_001108285.2	15A	15A	Right	15A	Right	15A	Right
GCA_001108405.1	10A	10A	Right	10A	Right	10A	Right
GCA_001108425.2	35F	35F	Right	35F	Right	35F	Right
GCA_001108445.1	06B	06B	Right	06|06E	Wrong	06E	Wrong
GCA_001108465.1	06C	06C	Right	06A|06B|06C|06D	Wrong	06C	Right
GCA_001108505.1	20	20	Right	20	Right	20	Right
GCA_001108565.1	14	14	Right	14	Right	14	Right
GCA_001108605.1	15A	15A	Right	15A	Right	15A	Right
GCA_001108645.1	06B	06B	Right	06|06E	Wrong	06E	Wrong
GCA_001108665.1	07F	07F	Right	07F|07A	Wrong	07F	Right
GCA_001108765.2	22F	22F	Right	22F	Right	22F	Right
GCA_001108825.1	34	34	Right	34	Right	34	Right
GCA_001108925.1	19F	19F	Right	19F	Right	19F	Right
GCA_001108965.1	34	34	Right	34	Right	34	Right
GCA_001109005.1	19F	19F	Right	19F	Right	19F	Right
GCA_001109065.1	06C	06C	Right	06A|06B|06C|06D	Wrong	06C	Right
GCA_001109085.2	15A	15A	Right	15A	Right	15A	Right
GCA_001109105.1	35F	35F	Right	35F	Right	35F	Right
GCA_001109125.1	34	34	Right	34	Right	34	Right
GCA_001109145.1	06B	06B	Right	06|06E	Wrong	06E	Wrong
GCA_001109165.1	06B	06B	Right	06|06E	Wrong	06E	Wrong
GCA_001109245.1	13	13	Right	13	Right	13	Right
GCA_001109265.2	06A	06A	Right	06A|06B	Wrong	06A	Right
GCA_001109385.2	06B	06B	Right	06|06E	Wrong	06E	Wrong
GCA_001109405.1	19F	19F	Right	19F	Right	19F	Right
GCA_001109445.1	06B	06B	Right	06|06E	Wrong	06E	Wrong
GCA_001109465.1	19F	19F	Right	19F	Right	19F	Right
GCA_001109565.1	32F	32F	Right	32F|32A	Wrong	27	Wrong
GCA_001109585.1	10B	10B	Right	10B	Right	10B	Right
GCA_001109685.1	34	34	Right	34	Right	34	Right
GCA_001109705.1	10A	10A	Right	10A	Right	10A	Right
GCA_001109725.1	06A	06A	Right	06A|06B	Wrong	06A	Right
GCA_001109845.1	19F	19F	Right	19F	Right	19F	Right
GCA_001109885.1	06A	06A	Right	06A|06B	Wrong	06A	Right
GCA_001109925.1	10B	10F	Wrong	10F	Wrong	10F	Wrong
GCA_001109965.2	15B|15C	15B	Right	15B|15C	Right	15B	Right
GCA_001110025.1	23F	23F	Right	23F	Right	23F	Right
GCA_001110065.1	19F	19F	Right	19F	Right	19F	Right
GCA_001110085.1	19F	19F	Right	19F	Right	19F	Right
GCA_001110165.2	16F	16F	Right	16F	Right	16F	Right
GCA_001110225.1	06B	06B	Right	06|06E	Wrong	06E	Wrong
GCA_001110245.1	14	14	Right	14	Right	14	Right
GCA_001110265.1	40	40	Right	07B|40	Wrong	40	Right
GCA_001110285.1	06B	06B	Right	06|06E	Wrong	06E	Wrong
GCA_001110305.2	06C	06C	Right	06C|06D	Wrong	06C	Right
GCA_001110325.1	07F	07F	Right	07F|07A	Wrong	07F	Right
GCA_001110345.1	06B	06B	Right	06|06E	Wrong	06E	Wrong
GCA_001110365.1	07B	07B	Right	07B|40	Wrong	07B	Right
GCA_001110385.1	34	34	Right	34	Right	34	Right
GCA_001110465.1	19F	19F	Right	19F	Right	19F	Right
GCA_001110485.2	15B|15C	15B	Right	15B|15C	Right	15B	Right
GCA_001110505.1	19A	19A	Right	19A	Right	19A	Right
GCA_001110525.1	19F	19F	Right	19F	Right	19F	Right
GCA_001110545.2	35F	35F	Right	35F	Right	35F	Right
GCA_001110585.1	14	14	Right	14	Right	14	Right
GCA_001110625.1	18C	18C	Right	18C|18B	Wrong	18C	Right
GCA_001110665.1	34	34	Right	34	Right	34	Right
GCA_001110785.1	15A	15A	Right	15A	Right	15A	Right
GCA_001110825.1	06A	06A	Right	06A|06B	Wrong	06A	Right
GCA_001110845.1	8	8	Right	8	Right	8	Right
GCA_001110885.1	3	3	Right	3	Right	3	Right
GCA_001110905.2	19A	19A	Right	19A	Right	19A	Right
GCA_001110965.1	15A	15A	Right	15A	Right	15A	Right
GCA_001110985.1	06B	06B	Right	06|06E	Wrong	06E	Wrong
GCA_001111045.1	34	34	Right	34	Right	34	Right
GCA_001111065.2	35F	35F	Right	35F	Right	35F	Right
GCA_001111105.1	23F	23F	Right	23F	Right	23F	Right
GCA_001111125.1	35F	35F	Right	35F	Right	35F	Right
GCA_001111145.1	19A	19A	Right	19A	Right	19A	Right
GCA_001111165.1	3	3	Right	3	Right	3	Right
GCA_001111205.2	11A	11A	Right	11A|11D	Wrong	11A	Right
GCA_001111245.2	11A	11A	Right	11A|11D	Wrong	11A	Right
GCA_001111265.1	14	14	Right	14	Right	14	Right
GCA_001111285.1	28F	28F	Right	28F|28A	Wrong	28A	Wrong
GCA_001111325.2	15B|15C	15B	Right	15B|15C	Right	15B	Right
GCA_001111365.1	06B	06B	Right	06|06E	Wrong	06E	Wrong
GCA_001111445.1	06B	06B	Right	06|06E	Wrong	06E	Wrong
GCA_001111465.1	15C	15C	Right	15B|15C	Wrong	15C	Right
GCA_001111485.2	06C	06C	Right	06C|06D	Wrong	06C	Right
GCA_001111605.1	19A	19A	Right	19A	Right	19A	Right
GCA_001111625.1	14	14	Right	14	Right	14	Right
GCA_001111665.1	13	13	Right	13	Right	13	Right
GCA_001111705.1	10B	10B	Right	10B	Right	10B	Right
GCA_001111765.2	3	3	Right	3	Right	3	Right
GCA_001111785.1	15A	15A	Right	15A	Right	15A	Right
GCA_001111805.2	15B|15C	15B|15C	Right	15B|15C	Right	15C	Right
GCA_001111845.1	14	14	Right	14	Right	14	Right
GCA_001111945.2	06B	06B	Right	06|06E	Wrong	06E	Wrong
GCA_001111985.1	09V	09V	Right	09A|09V	Wrong	09V	Right
GCA_001112005.1	06A	06A	Right	06A|06B	Wrong	06A	Right
GCA_001112145.2	19A	19A	Right	19A	Right	19A	Right
GCA_001112245.1	06A	06A	Right	06A|06B	Wrong	06A	Right
GCA_001112285.1	14	14	Right	14	Right	14	Right
GCA_001112485.1	35F	35F	Right	35F	Right	35F	Right
GCA_001112505.1	15B	15B	Right	15B|15C	Wrong	15B	Right
GCA_001112525.1	14	14	Right	14	Right	14	Right
GCA_001112545.1	14	14	Right	14	Right	14	Right
GCA_001112565.1	34	34	Right	34	Right	34	Right
GCA_001112605.1	14	14	Right	14	Right	14	Right
GCA_001112625.1	4	4	Right	4	Right	4	Right
GCA_001112645.1	15B	15C	Wrong	15B|15C	Wrong	15C	Wrong
GCA_001112685.1	19F	19F	Right	19F	Right	19F	Right
GCA_001112725.1	19F	19F	Right	19F	Right	19F	Right
GCA_001112785.1	19F	19F	Right	19F	Right	19F	Right
GCA_001112825.2	06A	06A	Right	06A|06B	Wrong	06A	Right
GCA_001112905.1	19F	19F	Right	19F	Right	19F	Right
GCA_001112985.1	19F	19F	Right	19F	Right	19F	Right
GCA_001113085.1	15B	15B	Right	15B|15C	Wrong	15B	Right
GCA_001113125.2	06A	06A	Right	06A|06B	Wrong	06A	Right
GCA_001113205.1	19B	19B	Right	19B	Right	31	Wrong
GCA_001113225.1	3	3	Right	3	Right	3	Right
GCA_001113245.1	06A	06B	Wrong	06|006E	Wrong	06E	Wrong
GCA_001113265.1	07B	07B	Right	07B|40	Wrong	07B	Right
GCA_001113285.1	06B	06B	Right	06|06E	Wrong	06E	Wrong
GCA_001113385.1	14	14	Right	14	Right	14	Right
GCA_001113405.1	06B	06B	Right	06|06E	Wrong	06E	Wrong
GCA_001113465.1	19A	19A	Right	19A	Right	19A	Right
GCA_001113505.1	15C	15C	Right	15B|15C	Wrong	15C	Right
GCA_001113545.1	07F	07F	Right	07F|07A	Wrong	07F	Right
GCA_001113565.1	24A	24A	Right	24A	Right	24B|24F	Wrong
GCA_001113625.1	19F	19F	Right	19F	Right	19F	Right
GCA_001113645.1	18C	18C	Right	18C|18B	Wrong	18C	Right
GCA_001113705.2	18C	18C	Right	18C|18B	Wrong	18C	Right
GCA_001113725.1	13	13	Right	13	Right	13	Right
GCA_001113745.1	19B	19B	Right	19B	Right	31	Wrong
GCA_001113785.2	17F	17F	Right	17F	Right	17F	Right
GCA_001113805.1	23F	23F	Right	23F	Right	23F	Right
GCA_001113825.1	19F	19F	Right	19F	Right	19F	Right
GCA_001113905.1	35F	35F	Right	35F	Right	35F	Right
GCA_001113965.1	14	14	Right	14	Right	14	Right
GCA_001113985.1	06B	06B	Right	06|06E	Wrong	06E	Wrong
GCA_001114025.1	06B	06B	Right	06|06E	Wrong	06E	Wrong
GCA_001114045.1	16F	16F	Right	16F	Right	16F	Right
GCA_001114125.1	16F	16F	Right	16F	Right	16F	Right
GCA_001114145.2	23A	23A	Right	23A	Right	23A	Right
GCA_001114165.2	06B	06B	Right	06A|06B	Wrong	06B	Right
GCA_001114245.2	35B	35B	Right	35B|35D	Wrong	35B	Right
GCA_001114345.2	06A	06A	Right	06|06E	Wrong	06E	Wrong
GCA_001114405.1	06A	06C	Wrong	06A|06B|06C|06D	Wrong	06C	Wrong
GCA_001114425.1	19F	19F	Right	19F	Right	19F	Right
GCA_001114465.2	15A	15A	Right	15A	Right	15A	Right
GCA_001114485.1	19F	19F	Right	19F	Right	19F	Right
GCA_001114525.2	22F	22F	Right	22F	Right	22F	Right
GCA_001114545.1	19F	19F	Right	19F	Right	19F	Right
GCA_001114585.1	19F	19F	Right	19F	Right	19F	Right
GCA_001114625.1	19F	19F	Right	19F	Right	19F	Right
GCA_001114645.1	23B	23B	Right	23B	Right	23B1	Wrong
GCA_001114685.1	06B	06B	Right	06|06E	Wrong	06E	Wrong
GCA_001114705.1	19F	19F	Right	19F	Right	19F	Right
GCA_001114805.1	19F	19F	Right	19F	Right	19F	Right
GCA_001114825.2	06C	06C	Right	06C|06D	Wrong	06C	Right
GCA_001114885.2	35B	35B	Right	35B|35D	Wrong	35B	Right
GCA_001114905.2	22F	22F	Right	22F	Right	22F	Right
GCA_001115065.2	23A	23A	Right	23A	Right	23A	Right
GCA_001115085.2	19A	19A	Right	19A	Right	19A	Right
GCA_001115125.1	21	21	Right	21	Right	21	Right
GCA_001115165.1	23F	23F	Right	23F	Right	23F	Right
GCA_001115205.1	23F	23F	Right	23F	Right	23F	Right
GCA_001115265.1	06B	06B	Right	06|06E	Wrong	06E	Wrong
GCA_001115285.1	15A	15A	Right	15A	Right	15A	Right
GCA_001115325.1	06B	06B	Right	06|06E	Wrong	06E	Wrong
GCA_001115345.1	23F	23F	Right	23F	Right	23F	Right
GCA_001115365.1	10A	10A	Right	10A	Right	10A	Right
GCA_001115425.1	19F	19F	Right	19F	Right	19F	Right
GCA_001115445.2	19F	19F	Right	19F	Right	19F	Right
GCA_001115465.1	13	13	Right	13	Right	13	Right
GCA_001115525.1	37	37	Right	37	Right	37	Right
GCA_001115565.1	32A	32F	Wrong	32F|32A	Wrong	27	Wrong
GCA_001115585.1	06B	06B	Right	06|06E	Wrong	06E	Wrong
GCA_001115605.1	34	34	Right	34	Right	34	Right
GCA_001115625.1	19F	19F	Right	19F	Right	19F	Right
GCA_001115645.1	23F	23F	Right	23F	Right	23F	Right
GCA_001115665.1	23F	23F	Right	23F	Right	23F	Right
GCA_001115745.1	13	13	Right	13	Right	13	Right
GCA_001115765.1	09N	09L	Wrong	09N|09L	Wrong	09L	Wrong
GCA_001115805.2	19A	19A	Right	19A	Right	19A	Right
GCA_001115825.2	06A	06A	Right	06A|06B	Wrong	06A	Right
GCA_001115865.1	14	14	Right	14	Right	14	Right
GCA_001115885.1	14	14	Right	14	Right	14	Right
GCA_001115925.1	14	14	Right	14	Right	14	Right
GCA_001115945.2	09V	09V	Right	09A|09V	Wrong	09V	Right
GCA_001115985.1	19F	19F	Right	19F	Right	19F	Right
GCA_001116005.2	19A	19A	Right	19A	Right	19A	Right
GCA_001116065.1	13	13	Right	13	Right	13	Right
GCA_001116085.1	23A	23A	Right	23A	Right	23A	Right
GCA_001116125.2	06C	06C	Right	06C|06D	Wrong	06C	Right
GCA_001116165.1	19A	19A	Right	19A	Right	19A	Right
GCA_001116185.1	14	14	Right	14	Right	14	Right
GCA_001116245.1	19F	19F	Right	19F	Right	19F	Right
GCA_001116405.1	19F	19F	Right	19F	Right	19F	Right
GCA_001116425.2	23F	23F	Right	23F	Right	23F	Right
GCA_001116465.1	19F	19F	Right	19F	Right	19F	Right
GCA_001116485.1	19F	19F	Right	19F	Right	19F	Right
GCA_001116505.1	06B	06B	Right	06|06E	Wrong	06E	Wrong
GCA_001116545.2	35B	35B	Right	35B|35D	Wrong	35B	Right
GCA_001116585.1	14	14	Right	14	Right	14	Right
GCA_001116605.1	19F	19F	Right	19F	Right	19F	Right
GCA_001116665.2	23F	23F	Right	23F	Right	23F	Right
GCA_001116705.1	19F	19F	Right	19F	Right	19F	Right
GCA_001116725.1	23A	23A	Right	23A	Right	23A	Right
GCA_001116765.2	22F	22F	Right	22F	Right	22F	Right
GCA_001116785.2	23A	23A	Right	23A	Right	23A	Right
GCA_001116845.1	19F	19F	Right	19F	Right	19F	Right
GCA_001116945.1	19F	19F	Right	19F	Right	19F	Right
GCA_001116965.1	4	4	Right	4	Right	4	Right
GCA_001116985.1	19F	19F	Right	19F	Right	19F	Right
GCA_001117045.1	06B	06B	Right	06|06E	Wrong	06E	Wrong
GCA_001117065.1	3	3	Right	3	Right	3	Right
GCA_001117165.2	15B|15C	15B|15C	Right	15B|15C	Right	15C	Right
GCA_001117185.1	06B	06B	Right	06|06E	Wrong	06E	Wrong
GCA_001117385.2	35B	35B	Right	35B|35D	Wrong	35B	Right
GCA_001117405.2	19A	19A	Right	19A	Right	19A	Right
GCA_001117545.1	13	13	Right	13	Right	13	Right
GCA_001117565.1	19F	19F	Right	19F	Right	19F	Right
GCA_001117605.1	06A	06A	Right	06A|06B	Wrong	06B	Wrong
GCA_001117625.1	35B	35B	Right	35B|35D	Wrong	35B	Right
GCA_001117645.1	06B	06B	Right	06|06E	Wrong	06E	Wrong
GCA_001117745.2	06C	06C	Right	06A|06B|06C|06D	Wrong	06C	Right
GCA_001117765.2	23A	23A	Right	23A	Right	23A	Right
GCA_001117825.1	3	3	Right	3	Right	3	Right
GCA_001117845.1	06A	06A	Right	06A|06B	Wrong	06A	Right
GCA_001117865.1	06B	06B	Right	06|06E	Wrong	06E	Wrong
GCA_001117885.1	19F	19F	Right	19F	Right	19F	Right
GCA_001117905.2	11A	11A	Right	11A|11D	Wrong	11A	Right
GCA_001117945.1	19F	19F	Right	19F	Right	19F	Right
GCA_001118025.1	19A	19A	Right	19A	Right	19A	Right
GCA_001118045.2	23A	23A	Right	23A	Right	23A	Right
GCA_001118065.1	19B	19B	Right	19B	Right	19F	Wrong
GCA_001118085.2	19A	19A	Right	19A	Right	19A	Right
GCA_001118105.1	23F	23F	Right	23F	Right	23F	Right
GCA_001118145.1	28F	28F	Right	28F|28A	Wrong	28A	Wrong
GCA_001118205.1	23F	23F	Right	23F	Right	23F	Right
GCA_001118265.1	3	3	Right	3	Right	3	Right
GCA_001118325.1	33B	33B	Right	33B|33D	Wrong	33B	Right
GCA_001118405.1	19F	19F	Right	19F	Right	19F	Right
GCA_001118445.1	21	21	Right	21	Right	21	Right
GCA_001118465.1	33C	33C	Right	33C	Right	33C	Right
GCA_001118485.2	11A	11A	Right	11A|11D	Wrong	11A	Right
GCA_001118505.2	06B	06B	Right	06A|06B	Wrong	06B	Right
GCA_001118525.1	34	34	Right	34	Right	34	Right
GCA_001118565.1	19F	19F	Right	19F	Right	19F	Right
GCA_001118605.1	19F	19F	Right	19F	Right	19F	Right
GCA_001118645.1	40	40	Right	07B|40	Wrong	40	Right
GCA_001118685.1	3	3	Right	3	Right	3	Right
GCA_001118705.1	06C	06C	Right	06A|06B|06C|06D	Wrong	06C	Right
GCA_001118725.2	38	38	Right	38	Right	38	Right
GCA_001118765.2	19A	19A	Right	19A	Right	19A	Right
GCA_001118845.1	10A	10A	Right	10A	Right	10A	Right
GCA_001118885.1	34	34	Right	34	Right	34	Right
GCA_001118925.1	23A	23A	Right	23A	Right	23A	Right
GCA_001118985.1	3	3	Right	3	Right	3	Right
GCA_001119005.1	35F	35F	Right	35F	Right	35F	Right
GCA_001119025.1	06B	06B	Right	06|06E	Wrong	06E	Wrong
GCA_001119045.2	35B	35B	Right	35B|35D	Wrong	35B	Right
GCA_001119065.1	06C	06C	Right	06A|06B|06C|06D	Wrong	06C	Right
GCA_001119105.1	14	14	Right	14	Right	14	Right
GCA_001119145.1	23F	23F	Right	23F	Right	23F	Right
GCA_001119165.1	15C	15C	Right	15B|15C	Wrong	15C	Right
GCA_001119205.1	19F	19F	Right	19F	Right	19F	Right
GCA_001119285.2	10A	10A	Right	10A	Right	10A	Right
GCA_001119325.1	15B	15B	Right	15B|15C	Wrong	15B	Right
GCA_001119345.2	22F	22F	Right	22F	Right	22F	Right
GCA_001119365.3	09V	09V	Right	09A|09V	Wrong	09V	Right
GCA_001119405.1	14	14	Right	14	Right	14	Right
GCA_001119465.2	19F	19F	Right	19F	Right	19F	Right
GCA_001119525.1	11A	11A	Right	NA	Wrong	11A	Right
GCA_001119565.1	19A	19A	Right	19A	Right	19A	Right
GCA_001119585.1	19F	19F	Right	19F	Right	19F	Right
GCA_001119605.1	18C	18C	Right	18C|18B	Wrong	18C	Right
GCA_001119645.1	15A	15A	Right	15A	Right	15A	Right
GCA_001119725.1	06C	06C	Right	06A|06B|06C|06D	Wrong	06C	Right
GCA_001119765.1	23F	23F	Right	23F	Right	23F	Right
GCA_001119845.2	06C	06C	Right	06C|06D	Wrong	06C	Right
GCA_001119885.1	34	34	Right	34	Right	34	Right
GCA_001119965.1	09N	09L	Wrong	09N|09L	Wrong	09L	Wrong
GCA_001120125.1	06B	06B	Right	06|06E	Wrong	06E	Wrong
GCA_001120185.2	19A	19A	Right	19A	Right	19A	Right
GCA_001120205.1	35F	35F	Right	35F	Right	35F	Right
GCA_001120225.1	06B	06B	Right	06|06E	Wrong	06E	Wrong
GCA_001120265.1	17F	17F	Right	17F	Right	17F	Right
GCA_001120325.1	23A	23A	Right	23A	Right	23A	Right
GCA_001120365.1	3	3	Right	3	Right	3	Right
GCA_001120485.1	15A	15B|15C	Wrong	15B|15C	Wrong	15C	Wrong
GCA_001120545.2	37	37	Right	37	Right	37	Right
GCA_001120585.1	23B	23B	Right	23B	Right	23B1	Wrong
GCA_001120745.1	34	34	Right	34	Right	34	Right
GCA_001120765.2	06A	06A	Right	06A|06B	Wrong	06A	Right
GCA_001120785.1	06B	06B	Right	06|06E	Wrong	06E	Wrong
GCA_001120825.1	19F	19F	Right	19F	Right	19F	Right
GCA_001120885.1	23A	23A	Right	23A	Right	23A	Right
GCA_001120925.2	15B|15C	15B	Right	15B|15C	Right	15B	Right
GCA_001120945.1	33B	33B	Right	33B|33D	Wrong	33B	Right
GCA_001121025.1	33B	33B	Right	33B|33D	Wrong	33B	Right
GCA_001121085.1	06B	06B	Right	06|06E	Wrong	06E	Wrong
GCA_001121105.1	19A	19A	Right	19A	Right	19A	Right
GCA_001121145.1	23F	23F	Right	23F	Right	23F	Right
GCA_001121165.1	4	4	Right	4	Right	4	Right
GCA_001121245.2	35B	35B	Right	35B|35D	Wrong	35B	Right
GCA_001121285.1	23A	23A	Right	23A	Right	23A	Right
GCA_001121305.1	32A	32F	Wrong	32F|32A	Wrong	27	Wrong
GCA_001121345.2	31	31	Right	31	Right	31	Right
GCA_001121385.1	06B	06B	Right	06|06E	Wrong	06E	Wrong
GCA_001121465.1	19A	19A	Right	19A	Right	19A	Right
GCA_001121505.1	11A	11A	Right	NA	Wrong	11A	Right
GCA_001121525.2	06C	06C	Right	06C|06D	Wrong	06C	Right
GCA_001121585.1	23A	23A	Right	23A	Right	23A	Right
GCA_001121645.1	06B	06B	Right	06|06E	Wrong	06E	Wrong
GCA_001121685.1	19F	19F	Right	19F	Right	19F	Right
GCA_001121725.1	15C	15C	Right	15B|15C	Wrong	15C	Right
GCA_001121765.2	07F	07F	Right	07F|07A	Wrong	07F	Right
GCA_001121825.1	19F	19F	Right	19F	Right	19F	Right
GCA_001121945.1	06B	06B	Right	06|06E	Wrong	06E	Wrong
GCA_001121965.1	22A	22A	Right	22A	Right	22A	Right
GCA_001122145.1	10B	10B	Right	10B	Right	10B	Right
GCA_001122185.2	16F	16F	Right	16F	Right	16F	Right
GCA_001122205.1	19A	19A	Right	19A	Right	19A	Right
GCA_001122245.1	23F	23F	Right	23F	Right	23F	Right
GCA_001122285.1	19F	19F	Right	19F	Right	19F	Right
GCA_001122385.2	3	3	Right	3	Right	3	Right
GCA_001122405.1	23F	23F	Right	23F	Right	23F	Right
GCA_001122425.1	15B	15B	Right	15B|15C	Wrong	15B	Right
GCA_001122445.1	06B	06B	Right	06|06E	Wrong	06E	Wrong
GCA_001122485.1	28F	28F	Right	28F|28A	Wrong	28A	Wrong
GCA_001122505.2	23A	23A	Right	23A	Right	23A	Right
GCA_001122545.1	17F	17F	Right	17F	Right	17F	Right
GCA_001122565.1	06B	06B	Right	06|06E	Wrong	06E	Wrong
GCA_001122645.1	06B	06B	Right	06|06E	Wrong	06E	Wrong
GCA_001122665.2	23B	23B	Right	23B	Right	23B	Right
GCA_001122685.2	06A	06A	Right	06A|06B	Wrong	06A	Right
GCA_001122705.1	19F	19F	Right	19F	Right	19F	Right
GCA_001122745.1	14	14	Right	14	Right	14	Right
GCA_001122825.1	09V	09V	Right	09A|09V	Wrong	09V	Right
GCA_001122845.1	06B	06B	Right	06|06E	Wrong	06E	Wrong
GCA_001122865.1	23F	23F	Right	23F	Right	23F	Right
GCA_001122885.1	34	34	Right	34	Right	34	Right
GCA_001122905.2	15B|15C	15C	Right	15B|15C	Right	15C	Right
GCA_001122925.1	06B	06B	Right	06|06E	Wrong	06E	Wrong
GCA_001122985.2	06C	06C	Right	06C|06D	Wrong	06C	Right
GCA_001123005.1	19F	19F	Right	19F	Right	19F	Right
GCA_001123125.1	23F	23F	Right	23F	Right	23F	Right
GCA_001123145.1	35F	35F	Right	35F	Right	35F	Right
GCA_001123185.1	06B	06B	Right	06|06E	Wrong	06E	Wrong
GCA_001123225.1	23F	23F	Right	23F	Right	23F	Right
GCA_001123245.1	14	14	Right	14	Right	14	Right
GCA_001123265.1	19F	19F	Right	19F	Right	19F	Right
GCA_001123325.1	22F	22F	Right	22F	Right	22F	Right
GCA_001123505.1	8	8	Right	8	Right	8	Right
GCA_001123545.1	18C	18C	Right	18C|18B	Wrong	18C	Right
GCA_001123665.1	35F	35F	Right	35F	Right	35F	Right
GCA_001123705.1	06B	06B	Right	06|06E	Wrong	06E	Wrong
GCA_001123725.1	19F	19F	Right	19F	Right	19F	Right
GCA_001123745.1	19F	19F	Right	19F	Right	19F	Right
GCA_001123865.2	06A	06A	Right	06A|06B	Wrong	06A	Right
GCA_001123885.1	28F	28F	Right	28F|28A	Wrong	28A	Wrong
GCA_001123945.1	06C	06C	Right	06A|06B|06C|06D	Wrong	06C	Right
GCA_001123985.1	06B	06B	Right	06|06E	Wrong	06E	Wrong
GCA_001124005.2	11A	11A	Right	11A|11D	Wrong	11A	Right
GCA_001124045.1	06B	06B	Right	06|06E	Wrong	06E	Wrong
GCA_001124165.2	22F	22F	Right	22F	Right	22F	Right
GCA_001124205.1	19F	19F	Right	19F	Right	19F	Right
GCA_001124225.1	06B	06B	Right	06|06E	Wrong	06E	Wrong
GCA_001124445.1	06B	06B	Right	06|06E	Wrong	06E	Wrong
GCA_001124465.1	23F	23F	Right	23F	Right	23F	Right
GCA_001124485.1	34	34	Right	34	Right	34	Right
GCA_001124505.1	13	13	Right	13	Right	13	Right
GCA_001124545.1	06C	06C	Right	06A|06B|06C|06D	Wrong	06C	Right
GCA_001124605.1	06A	06A	Right	06A|06B	Wrong	06A	Right
GCA_001124625.1	14	14	Right	14	Right	14	Right
GCA_001124645.1	21	21	Right	21	Right	21	Right
GCA_001124665.1	23A	23A	Right	23A	Right	23A	Right
GCA_001124765.2	19F	19F	Right	19F	Right	19F	Right
GCA_001124785.1	38	38	Right	25F|25A|38	Wrong	38	Right
GCA_001124845.2	15B|15C	15B	Right	15B|15C	Right	15B	Right
GCA_001124865.1	07F	07F	Right	07F|07A	Wrong	07F	Right
GCA_001124905.1	14	14	Right	14	Right	14	Right
GCA_001124965.1	19F	19F	Right	19F	Right	19F	Right
GCA_001125045.1	06B	06B	Right	06|06E	Wrong	06E	Wrong
GCA_001125065.1	19A	19A	Right	19A	Right	19A	Right
GCA_001125105.1	19B	19B	Right	19B	Right	19F	Wrong
GCA_001125125.1	34	34	Right	34	Right	34	Right
GCA_001125145.1	15A	15A	Right	15A	Right	15A	Right
GCA_001125185.1	14	14	Right	14	Right	14	Right
GCA_001125305.1	19F	19F	Right	19F	Right	19F	Right
GCA_001125365.1	11A	11A	Right	NA	Wrong	11A	Right
GCA_001125385.1	3	3	Right	3	Right	3	Right
GCA_001125405.1	06B	06B	Right	06|06E	Wrong	06E	Wrong
GCA_001125425.2	16F	16F	Right	16F	Right	16F	Right
GCA_001125505.1	8	8	Right	8	Right	8	Right
GCA_001125525.2	35B	35B	Right	35B|35D	Wrong	35B	Right
GCA_001125545.2	35B	35B	Right	35B|35D	Wrong	35B	Right
GCA_001125565.1	23F	23F	Right	23F	Right	23F	Right
GCA_001125585.1	23F	23F	Right	23F	Right	23F	Right
GCA_001125605.1	06C	06C	Right	06A|06B|06C|06D	Wrong	06C	Right
GCA_001125625.1	06B	06D	Wrong	06A|06B|06C|06D	Wrong	06C	Wrong
GCA_001125645.1	35C	35B	Wrong	35B|35D	Wrong	35B	Wrong
GCA_001125665.1	23F	23F	Right	23F	Right	23F	Right
GCA_001125685.1	20	20	Right	20	Right	20	Right
GCA_001125705.1	19F	19F	Right	19F	Right	19F	Right
GCA_001125765.2	19A	19A	Right	19A	Right	19A	Right
GCA_001125805.1	23F	23F	Right	23F	Right	23F	Right
GCA_001125905.1	3	3	Right	3	Right	3	Right
GCA_001125925.2	23F	23F	Right	23F	Right	23F	Right
GCA_001125985.1	19F	19F	Right	19F	Right	19F	Right
GCA_001126005.1	23F	23F	Right	23F	Right	23F	Right
GCA_001126025.1	23A	23A	Right	23A	Right	23A	Right
GCA_001126105.1	3	3	Right	3	Right	3	Right
GCA_001126145.1	34	34	Right	34	Right	34	Right
GCA_001126205.1	06B	06B	Right	06|06E	Wrong	06E	Wrong
GCA_001126225.1	06B	06B	Right	06|06E	Wrong	06E	Wrong
GCA_001126305.1	19F	19F	Right	19F	Right	19F	Right
GCA_001126365.1	14	14	Right	14	Right	14	Right
GCA_001126425.2	23B	23B	Right	23B	Right	23B1	Wrong
GCA_001126445.2	34	34	Right	34	Right	34	Right
GCA_001126485.1	19F	19F	Right	19F	Right	19F	Right
GCA_001126525.2	23A	23A	Right	23A	Right	23A	Right
GCA_001126545.1	23A	23A	Right	23A	Right	23A	Right
GCA_001126565.1	15B	15C	Wrong	15B|15C	Wrong	15C	Wrong
GCA_001126605.2	07F	07F	Right	07F|07A	Wrong	07F	Right
GCA_001126685.1	23F	23F	Right	23F	Right	23F	Right
GCA_001126765.1	23F	23F	Right	23F	Right	23F	Right
GCA_001126945.2	11A	11A	Right	11A|11D	Wrong	11A	Right
GCA_001126985.1	19F	19F	Right	19F	Right	19F	Right
GCA_001127005.1	8	8	Right	8	Right	8	Right
GCA_001127025.1	19F	19F	Right	19F	Right	19F	Right
GCA_001127045.1	3	3	Right	3	Right	3	Right
GCA_001127085.1	19F	19F	Right	19F	Right	19F	Right
GCA_001127145.2	23F	23F	Right	23F	Right	23F	Right
GCA_001127165.1	14	14	Right	14	Right	14	Right
GCA_001127205.2	31	31	Right	31	Right	31	Right
GCA_001127225.1	14	14	Right	14	Right	14	Right
GCA_001127245.2	10A	10A	Right	10A	Right	10A	Right
GCA_001127265.1	19F	19F	Right	19F	Right	19F	Right
GCA_001127285.2	23A	23A	Right	23A	Right	23A	Right
GCA_001127305.1	06B	06B	Right	06|06E	Wrong	06E	Wrong
GCA_001127325.2	19A	19A	Right	19A	Right	19A	Right
GCA_001127345.1	15B	15B	Right	15B|15C	Wrong	15B	Right
GCA_001127365.1	19F	19F	Right	19F	Right	19F	Right
GCA_001127405.2	3	3	Right	3	Right	3	Right
GCA_001127425.1	19F	19F	Right	19F	Right	19F	Right
GCA_001127445.1	19F	19F	Right	19F	Right	19F	Right
GCA_001127465.1	23F	23F	Right	23F	Right	23F	Right
GCA_001127525.1	35F	35F	Right	35F	Right	35F	Right
GCA_001127545.2	19A	19A	Right	19A	Right	19A	Right
GCA_001127585.1	19A	23F	Wrong	23F	Wrong	23F	Wrong
GCA_001127625.2	23B	23B	Right	23B	Right	23B1	Wrong
GCA_001127725.1	23F	23F	Right	23F	Right	23F	Right
GCA_001127765.1	15A	15A	Right	15A	Right	15A	Right
GCA_001127805.2	19A	19A	Right	19A	Right	19A	Right
GCA_001127845.2	10A	10A	Right	10A	Right	10A	Right
GCA_001127905.1	35F	35F	Right	35F	Right	35F	Right
GCA_001127925.1	19F	19F	Right	19F	Right	19F	Right
GCA_001127985.1	3	3	Right	3	Right	3	Right
GCA_001128005.1	14	14	Right	14	Right	14	Right
GCA_001128045.1	17F	17F	Right	17F	Right	17F	Right
GCA_001128085.1	21	21	Right	21	Right	21	Right
GCA_001128145.1	15B	15B	Right	15B|15C	Wrong	15B	Right
GCA_001128165.1	19A	19A	Right	19A	Right	19A	Right
GCA_001128185.2	38	38	Right	38	Right	38	Right
GCA_001128225.1	28F	28F	Right	28F|28A	Wrong	28A	Wrong
GCA_001128245.1	23F	23F	Right	23F	Right	23F	Right
GCA_001128285.1	20	20	Right	20	Right	20	Right
GCA_001128345.1	06B	06B	Right	06|06E	Wrong	06E	Wrong
GCA_001128465.1	07B	07B	Right	07B|40	Wrong	07B	Right
GCA_001128485.1	23F	23F	Right	23F	Right	23F	Right
GCA_001128505.1	19F	19F	Right	19F	Right	19F	Right
GCA_001128565.2	23A	23A	Right	23A	Right	23A	Right
GCA_001128585.2	19F	19F	Right	19F	Right	19F	Right
GCA_001128605.2	07F	07F	Right	07F|07A	Wrong	07F	Right
GCA_001128645.1	13	13	Right	13	Right	13	Right
GCA_001128665.1	19F	19F	Right	19F	Right	19F	Right
GCA_001128825.1	19F	19F	Right	19F	Right	19F	Right
GCA_001128845.1	15A	15A	Right	15A	Right	15A	Right
GCA_001128905.1	3	3	Right	3	Right	3	Right
GCA_001128925.1	19F	19F	Right	19F	Right	19F	Right
GCA_001128945.1	35C	35A	Wrong	35A|35C|42	Wrong	35A	Wrong
GCA_001128985.1	23F	23F	Right	23F	Right	23F	Right
GCA_001129005.1	19F	19F	Right	19F	Right	19F	Right
GCA_001129025.2	11A	11A	Right	11A|11D	Wrong	11A	Right
GCA_001129125.1	3	3	Right	3	Right	3	Right
GCA_001129185.1	06B	06B	Right	06|06E	Wrong	06E	Wrong
GCA_001129265.1	14	14	Right	14	Right	14	Right
GCA_001129285.1	19B	19B	Right	19B	Right	19F	Wrong
GCA_001129365.1	36	36	Right	36	Right	14	Wrong
GCA_001129405.1	06B	06B	Right	06|06E	Wrong	06E	Wrong
GCA_001129445.1	14	14	Right	14	Right	14	Right
GCA_001129465.2	15B|15C	15B|15C	Right	15B|15C	Right	15C	Right
GCA_001129525.1	35F	35F	Right	35F	Right	35F	Right
GCA_001129545.1	22F	22F	Right	22F	Right	22F	Right
GCA_001129565.1	16F	16F	Right	16F	Right	16F	Right
GCA_001129645.1	38	38	Right	25F|25A|38	Wrong	38	Right
GCA_001129685.1	19A	19A	Right	19A	Right	23B1	Wrong
GCA_001129745.2	15B|15C	15B	Right	15B|15C	Right	15B	Right
GCA_001129765.2	15A	15A	Right	15A	Right	15A	Right
GCA_001129785.1	19F	19F	Right	19F	Right	19F	Right
GCA_001129825.1	15A	15A	Right	15A	Right	15A	Right
GCA_001129845.2	23F	23F	Right	23F	Right	23F	Right
GCA_001129865.1	06B	06B	Right	06|06E	Wrong	06E	Wrong
GCA_001129905.2	21	21	Right	21	Right	21	Right
GCA_001129945.1	19F	19F	Right	19F	Right	19F	Right
GCA_001129965.1	34	34	Right	34	Right	34	Right
GCA_001130005.1	15B	15B	Right	15B|15C	Wrong	15B	Right
GCA_001130045.1	23F	23F	Right	23F	Right	23F	Right
GCA_001130065.1	23F	23F	Right	23F	Right	23F	Right
GCA_001130085.1	35F	35F	Right	35F	Right	35F	Right
GCA_001130105.2	23A	23A	Right	23A	Right	23A	Right
GCA_001130125.1	35F	35F	Right	35F	Right	35F	Right
GCA_001130145.1	06B	06B	Right	06|06E	Wrong	06E	Wrong
GCA_001130165.2	15A	15A	Right	15A	Right	15A	Right
GCA_001130225.1	19F	19F	Right	19F	Right	19F	Right
GCA_001130245.2	37	37	Right	37	Right	37	Right
GCA_001130325.1	19B	19B	Right	19B	Right	31	Wrong
GCA_001130385.2	3	3	Right	3	Right	3	Right
GCA_001130405.1	06B	06B	Right	06|06E	Wrong	06E	Wrong
GCA_001130445.1	14	14	Right	14	Right	14	Right
GCA_001130465.2	15F	15B|15C	Wrong	15B|15C	Wrong	15C	Wrong
GCA_001130485.2	15B|15C	15B|15C	Right	15B|15C	Right	15C	Right
GCA_001130565.1	19F	19F	Right	19F	Right	19F	Right
GCA_001130605.1	10A	10A	Right	10A	Right	10A	Right
GCA_001130665.2	11A	11A	Right	11A|11D	Wrong	11A	Right
GCA_001130765.1	14	14	Right	14	Right	14	Right
GCA_001130785.1	06B	06B	Right	06|06E	Wrong	06E	Wrong
GCA_001130805.2	35B	35B	Right	35B|35D	Wrong	35B	Right
GCA_001130825.1	06A	06A	Right	06|06E	Wrong	06E	Wrong
GCA_001130845.1	23A	23A	Right	23A	Right	23A	Right
GCA_001130885.1	19F	19F	Right	19F	Right	19F	Right
GCA_001130945.1	15A	15A	Right	15A	Right	15A	Right
GCA_001130965.1	23F	23F	Right	23F	Right	23F	Right
GCA_001130985.1	19F	19F	Right	19F	Right	19F	Right
GCA_001131005.1	23F	23F	Right	23F	Right	23F	Right
GCA_001131025.1	29	35B	Wrong	35B|35D	Wrong	35B	Wrong
GCA_001131045.1	15B	15B	Right	15B|15C	Wrong	15B	Right
GCA_001131065.1	15C	15C	Right	15B|15C	Wrong	15C	Right
GCA_001131085.2	22F	22F	Right	22F	Right	22F	Right
GCA_001131105.1	23F	23F	Right	23F	Right	23F	Right
GCA_001131125.1	06B	06B	Right	06|06E	Wrong	06E	Wrong
GCA_001131165.1	06A	06A	Right	06A|06B	Wrong	06A	Right
GCA_001131205.2	11A	11A	Right	11A|11D	Wrong	11A	Right
GCA_001131225.1	06B	06B	Right	06|06E	Wrong	06E	Wrong
GCA_001131265.1	14	14	Right	14	Right	14	Right
GCA_001131345.1	15B	15B	Right	15B|15C	Wrong	15B	Right
GCA_001131445.1	19A	19A	Right	19A	Right	19A	Right
GCA_001131485.1	40	40	Right	07B|40	Wrong	40	Right
GCA_001131545.1	20	20	Right	20	Right	20	Right
GCA_001131725.2	35B	35B	Right	35B|35D	Wrong	35B	Right
GCA_001131745.1	13	13	Right	13	Right	13	Right
GCA_001131805.1	14	14	Right	14	Right	14	Right
GCA_001131825.1	10B	10B	Right	10B	Right	10B	Right
GCA_001131865.1	06B	06B	Right	06|06E	Wrong	06E	Wrong
GCA_001131885.1	06B	06B	Right	06|06E	Wrong	06E	Wrong
GCA_001131905.1	31	31	Right	31	Right	31	Right
GCA_001131925.1	17F	17F	Right	17F	Right	17F	Right
GCA_001131945.1	2	2	Right	2	Right	2	Right
GCA_001131985.1	06B	06B	Right	06|06E	Wrong	06E	Wrong
GCA_001132025.1	33B	33B	Right	33B|33D	Wrong	33B	Right
GCA_001132045.1	19F	19F	Right	19F	Right	19F	Right
GCA_001132105.1	14	14	Right	14	Right	14	Right
GCA_001132145.3	15B|15C	15B|15C	Right	15B|15C	Right	15C	Right
GCA_001132225.1	06B	06B	Right	06|06E	Wrong	06E	Wrong
GCA_001132325.1	19F	19F	Right	19F	Right	19F	Right
GCA_001132345.1	11A	11A	Right	NA	Wrong	11A	Right
GCA_001132385.1	06B	06B	Right	06|06E	Wrong	06E	Wrong
GCA_001132405.1	19A	19A	Right	19A	Right	19A	Right
GCA_001132465.2	19F	19F	Right	19F	Right	19F	Right
GCA_001132485.1	39	39	Right	39	Right	39	Right
GCA_001132505.1	15B	15B	Right	15B|15C	Wrong	15B	Right
GCA_001132525.1	23F	23F	Right	23F	Right	23F	Right
GCA_001132545.1	19F	19F	Right	19F	Right	19F	Right
GCA_001132565.1	06A	06A	Right	06A|06B	Wrong	06A	Right
GCA_001132585.1	19B	19B	Right	19B	Right	19F	Wrong
GCA_001132685.2	06A	06A	Right	06A|06B	Wrong	06A	Right
GCA_001132805.1	33F	33F	Right	NA	Wrong	35D	Wrong
GCA_001132825.2	23B	23B	Right	23B	Right	23B1	Wrong
GCA_001132845.1	22A	22A	Right	22A	Right	22A	Right
GCA_001132865.1	19F	19F	Right	19F	Right	19F	Right
GCA_001132945.1	19F	19F	Right	19F	Right	19F	Right
GCA_001132965.1	23A	23A	Right	23A	Right	23A	Right
GCA_001132985.2	06C	06C	Right	06C|06D	Wrong	06C	Right
GCA_001133045.1	28F	28F	Right	28F|28A	Wrong	28A	Wrong
GCA_001133085.1	4	4	Right	4	Right	4	Right
GCA_001133125.1	22F	22F	Right	22F	Right	22F	Right
GCA_001133145.1	34	34	Right	34	Right	34	Right
GCA_001133165.1	3	3	Right	3	Right	3	Right
GCA_001133185.1	17F	17F	Right	17F	Right	17F	Right
GCA_001133205.2	23A	23A	Right	23A	Right	23A	Right
GCA_001133245.1	19F	19F	Right	19F	Right	19F	Right
GCA_001133265.1	06B	06B	Right	06|06E	Wrong	06E	Wrong
GCA_001133365.2	23B	23B	Right	23B	Right	23B1	Wrong
GCA_001133385.1	34	34	Right	34	Right	34	Right
GCA_001133465.1	19F	19F	Right	19F	Right	19F	Right
GCA_001133485.2	35B	35B	Right	35B|35D	Wrong	35B	Right
GCA_001133505.1	06A	06A	Right	06A|06B	Wrong	06A	Right
GCA_001133545.1	09V	09V	Right	09A|09V	Wrong	09V	Right
GCA_001133665.1	15A	15A	Right	15A	Right	15A	Right
GCA_001133705.1	06B	06B	Right	06|06E	Wrong	06E	Wrong
GCA_001133725.2	06A	06A	Right	06A|06B	Wrong	06A	Right
GCA_001133805.1	45	45	Right	45	Right	5	Wrong
GCA_001133825.1	17F	17F	Right	17F	Right	17F	Right
GCA_001133845.1	06A	06A	Right	06A|06B	Wrong	06A	Right
GCA_001133865.2	35B	35B	Right	35B|35D	Wrong	35B	Right
GCA_001133885.2	19F	19F	Right	19F	Right	19F	Right
GCA_001133945.1	19F	19F	Right	19F	Right	19F	Right
GCA_001134085.2	19A	19A	Right	19A	Right	19A	Right
GCA_001134105.1	07B	07B	Right	07B|40	Wrong	07B	Right
GCA_001134145.1	28F	28F	Right	28F|28A	Wrong	28A	Wrong
GCA_001134185.1	06B	06B	Right	06|06E	Wrong	06E	Wrong
GCA_001134285.1	19F	19F	Right	19F	Right	19F	Right
GCA_001134385.1	5	5	Right	5	Right	5	Right
GCA_001134445.1	14	14	Right	14	Right	14	Right
GCA_001134465.2	11A	11A	Right	11A|11D	Wrong	11A	Right
GCA_001134545.1	23A	23A	Right	23A	Right	23A	Right
GCA_001134665.1	06B	06B	Right	06|06E	Wrong	06E	Wrong
GCA_001134685.1	19B	19B	Right	19B	Right	31	Wrong
GCA_001134765.1	3	3	Right	3	Right	3	Right
GCA_001134825.2	3	3	Right	3	Right	3	Right
GCA_001134845.1	06A	06A	Right	06A|06B	Wrong	06A	Right
GCA_001134865.1	19F	19F	Right	19F	Right	19F	Right
GCA_001134925.1	40	40	Right	07B|40	Wrong	40	Right
GCA_001135045.1	33D	33B	Wrong	33B|33D	Wrong	33B	Wrong
GCA_001135085.2	19F	19F	Right	19F	Right	19F	Right
GCA_001135145.1	23F	23F	Right	23F	Right	23F	Right
GCA_001135165.1	35F	35F	Right	35F	Right	35F	Right
GCA_001135205.1	11A	11A	Right	NA	Wrong	11A	Right
GCA_001135325.2	23F	23F	Right	23F	Right	23F	Right
GCA_001135345.1	23A	23A	Right	23A	Right	23A	Right
GCA_001135365.2	10A	10A	Right	10A	Right	10A	Right
GCA_001135445.2	23A	23A	Right	23A	Right	23A	Right
GCA_001135545.1	06B	06B	Right	06|06E	Wrong	06E	Wrong
GCA_001135565.1	21	21	Right	21	Right	21	Right
GCA_001135625.1	35F	35F	Right	35F	Right	35F	Right
GCA_001135645.2	15A	15A	Right	15A	Right	15A	Right
GCA_001135665.1	23F	23F	Right	23F	Right	23F	Right
GCA_001135685.1	34	34	Right	34	Right	34	Right
GCA_001135705.1	22A	22A	Right	22A	Right	22A	Right
GCA_001135725.1	19F	19F	Right	19F	Right	19F	Right
GCA_001135765.2	19A	19A	Right	19A	Right	19A	Right
GCA_001135845.1	23F	23F	Right	23F	Right	23F	Right
GCA_001135885.1	06B	06B	Right	06|06E	Wrong	06E	Wrong
GCA_001135945.1	19A	19A	Right	19A	Right	19A	Right
GCA_001135985.1	19F	19F	Right	19F	Right	19F	Right
GCA_001136025.1	15A	15A	Right	15A	Right	15A	Right
GCA_001136045.1	14	14	Right	14	Right	14	Right
GCA_001136065.2	19A	19A	Right	19A	Right	19A	Right
GCA_001136105.1	3	3	Right	3	Right	3	Right
GCA_001136145.2	19A	19A	Right	19A	Right	19A	Right
GCA_001136165.2	06A	06A	Right	06A|06B	Wrong	06A	Right
GCA_001136185.1	06A	06A	Right	06A|06B	Wrong	06A	Right
GCA_001136205.1	16F	16F	Right	16F	Right	16F	Right
GCA_001136225.1	06B	06B	Right	06|06E	Wrong	06E	Wrong
GCA_001136245.1	06B	06B	Right	06|06E	Wrong	06E	Wrong
GCA_001136285.1	11A	11A	Right	NA	Wrong	11A	Right
GCA_001136425.1	06B	06B	Right	06|06E	Wrong	06E	Wrong
GCA_001136485.1	3	3	Right	3	Right	3	Right
GCA_001136545.1	15A	15A	Right	15A	Right	15A	Right
GCA_001136565.1	16F	16F	Right	16F	Right	16F	Right
GCA_001136585.1	06B	06B	Right	06|06E	Wrong	06E	Wrong
GCA_001136625.1	23F	23F	Right	23F	Right	23F	Right
GCA_001136665.1	14	14	Right	14	Right	14	Right
GCA_001136685.1	19F	19F	Right	19F	Right	19F	Right
GCA_001136705.2	35B	35B	Right	35B|35D	Wrong	35B	Right
GCA_001136785.1	34	34	Right	34	Right	34	Right
GCA_001136825.2	09V	09V	Right	09A|09V	Wrong	09V	Right
GCA_001136845.1	21	21	Right	21	Right	21	Right
GCA_001136865.1	19F	19F	Right	19F	Right	19F	Right
GCA_001136905.1	19F	19F	Right	19F	Right	19F	Right
GCA_001136925.1	14	14	Right	14	Right	14	Right
GCA_001136945.1	19F	19F	Right	19F	Right	19F	Right
GCA_001137005.1	33D	33B	Wrong	33B|33D	Wrong	33B	Wrong
GCA_001137045.1	13	13	Right	13	Right	13	Right
GCA_001137085.1	19F	19F	Right	19F	Right	19F	Right
GCA_001137105.1	10F	10F	Right	10F	Right	10F	Right
GCA_001137125.1	19F	19F	Right	19F	Right	19F	Right
GCA_001137145.1	14	14	Right	14	Right	14	Right
GCA_001137165.1	15B	15B	Right	15B|15C	Wrong	15B	Right
GCA_001137185.2	15A	15A	Right	15A	Right	15A	Right
GCA_001137225.1	14	14	Right	14	Right	14	Right
GCA_001137265.2	06C	06C	Right	06C|06D	Wrong	06C	Right
GCA_001137285.1	10A	10A	Right	10A	Right	10A	Right
GCA_001137325.1	10A	10A	Right	10A	Right	10A	Right
GCA_001137345.2	07C	07C	Right	07C	Right	07C	Right
GCA_001137425.2	35B	35B	Right	35B|35D	Wrong	35B	Right
GCA_001137445.1	19F	19F	Right	19F	Right	19F	Right
GCA_001137465.1	15A	15A	Right	15A	Right	15A	Right
GCA_001137485.1	19F	19F	Right	19F	Right	19F	Right
GCA_001137565.1	23F	23F	Right	23F	Right	23F	Right
GCA_001137585.1	09N	09L	Wrong	09N|09L	Wrong	09L	Wrong
GCA_001137665.1	06B	06B	Right	06|06E	Wrong	06E	Wrong
GCA_001137685.1	14	14	Right	14	Right	14	Right
GCA_001137765.1	07B	07B	Right	07B|40	Wrong	07B	Right
GCA_001137785.1	35C	35B	Wrong	35B|35D	Wrong	35B	Wrong
GCA_001137805.2	19A	19A	Right	19A	Right	19A	Right
GCA_001137845.1	10B	10B	Right	10B	Right	10B	Right
GCA_001137865.1	06B	06B	Right	06|06E	Wrong	06E	Wrong
GCA_001137905.1	23F	23F	Right	23F	Right	23F	Right
GCA_001137945.1	14	14	Right	14	Right	14	Right
GCA_001137965.1	06B	06B	Right	06|06E	Wrong	06E	Wrong
GCA_001138005.2	06B	06B	Right	06A|06B	Wrong	06B	Right
GCA_001138025.1	06B	06B	Right	06|06E	Wrong	06E	Wrong
GCA_001138065.1	3	3	Right	3	Right	3	Right
GCA_001138185.1	19F	19F	Right	19F	Right	19F	Right
GCA_001138205.1	3	3	Right	3	Right	3	Right
GCA_001138385.1	10F	10F	Right	10F	Right	10F	Right
GCA_001138425.1	23F	23F	Right	23F	Right	23F	Right
GCA_001138505.1	35C	35C	Right	35A|35C|42	Wrong	35C	Right
GCA_001138525.1	23B	23B	Right	23B	Right	23B1	Wrong
GCA_001138565.1	19F	19F	Right	19F	Right	19F	Right
GCA_001138585.1	15A	15A	Right	15A	Right	15A	Right
GCA_001138625.1	06B	06B	Right	06|06E	Wrong	06E	Wrong
GCA_001138685.1	23B	23B	Right	23B	Right	23B1	Wrong
GCA_001138745.1	11A	11A	Right	NA	Wrong	11A	Right
GCA_001138805.1	06A	06A	Right	06A|06B	Wrong	06A	Right
GCA_001138845.1	15C	15C	Right	15B|15C	Wrong	15C	Right
GCA_001138865.1	23F	23F	Right	23F	Right	23F	Right
GCA_001138925.1	06C	06C	Right	06A|06B|06C|06D	Wrong	06C	Right
GCA_001138945.1	19F	19F	Right	19F	Right	19F	Right
GCA_001138965.1	24F	24F	Right	24F|24B	Wrong	24F	Right
GCA_001138985.1	06C	06C	Right	06A|06B|06C|06D	Wrong	06C	Right
GCA_001139005.2	15B|15C	15B	Right	15B|15C	Right	15B	Right
GCA_001139025.1	19F	19F	Right	19F	Right	19F	Right
GCA_001139065.2	19A	19A	Right	19A	Right	19A	Right
GCA_001139165.1	10F	10F	Right	10F	Right	10F	Right
GCA_001139225.1	06C	06C	Right	06A|06B|06C|06D	Wrong	06C	Right
GCA_001139265.1	06B	06B	Right	06|06E	Wrong	06E	Wrong
GCA_001139285.1	06B	06B	Right	06|06E	Wrong	06E	Wrong
GCA_001139305.1	06B	06B	Right	06|06E	Wrong	06E	Wrong
GCA_001139365.2	06A	06A	Right	06A|06B	Wrong	06A	Right
GCA_001139405.1	11A	11A	Right	NA	Wrong	11A	Right
GCA_001139425.1	23F	23F	Right	23F	Right	23F	Right
GCA_001139465.1	06B	06B	Right	06|06E	Wrong	06E	Wrong
GCA_001139485.1	19F	19F	Right	19F	Right	19F	Right
GCA_001139525.1	3	3	Right	3	Right	3	Right
GCA_001139545.2	11A	11A	Right	11A|11D	Wrong	11A	Right
GCA_001139605.1	10B	10B	Right	10B	Right	10B	Right
GCA_001139625.2	15B|15C	15B	Right	15B|15C	Right	15B	Right
GCA_001139645.2	23B	23B	Right	23B	Right	23B	Right
GCA_001139665.1	06C	06C	Right	06A|06B|06C|06D	Wrong	06C	Right
GCA_001139685.1	06B	06B	Right	06|06E	Wrong	06E	Wrong
GCA_001139725.1	15C	15C	Right	15B|15C	Wrong	15C	Right
GCA_001139765.1	32A	32F	Wrong	32F|32A	Wrong	27	Wrong
GCA_001139825.1	34	34	Right	34	Right	34	Right
GCA_001139845.1	11A	11A	Right	NA	Wrong	11A	Right
GCA_001139865.1	07F	07F	Right	07F|07A	Wrong	07F	Right
GCA_001139905.1	17F	17F	Right	17F	Right	17F	Right
GCA_001139925.1	06B	06B	Right	06|06E	Wrong	06E	Wrong
GCA_001140005.1	19F	19F	Right	19F	Right	19F	Right
GCA_001140045.1	11A	11A	Right	NA	Wrong	11A	Right
GCA_001140085.1	19F	19F	Right	19F	Right	19F	Right
GCA_001140105.2	06A	06A	Right	06A|06B	Wrong	06A	Right
GCA_001140145.1	23F	23F	Right	23F	Right	23F	Right
GCA_001140185.1	14	14	Right	14	Right	14	Right
GCA_001140225.1	19F	19F	Right	19F	Right	19F	Right
GCA_001140285.1	09N	09N	Right	09N|09L	Wrong	09N	Right
GCA_001140365.2	35B	35B	Right	35B|35D	Wrong	35B	Right
GCA_001140425.1	09N	09L	Wrong	09N|09L	Wrong	09L	Wrong
GCA_001140525.2	06A	06A	Right	06A|06B	Wrong	06A	Right
GCA_001140545.1	19F	19F	Right	19F	Right	19F	Right
GCA_001140645.1	3	3	Right	3	Right	3	Right
GCA_001140685.2	19F	19F	Right	19F	Right	19F	Right
GCA_001140705.1	34	34	Right	34	Right	34	Right
GCA_001140745.1	10A	10A	Right	10A	Right	10A	Right
GCA_001140805.2	15F	15C	Wrong	15B|15C	Wrong	15B	Wrong
GCA_001140825.1	14	14	Right	14	Right	14	Right
GCA_001140865.1	19A	19A	Right	19A	Right	19A	Right
GCA_001140885.1	15C	15B|15C	Wrong	15B|15C	Wrong	15C	Right
GCA_001140925.1	06B	06B	Right	06|06E	Wrong	06E	Wrong
GCA_001140965.1	23F	23F	Right	23F	Right	23F	Right
GCA_001141145.1	33C	33C	Right	33C	Right	33C	Right
GCA_001141245.1	35C	35B	Wrong	35B|35D	Wrong	35B	Wrong
GCA_001141265.1	23F	23F	Right	23F	Right	23F	Right
GCA_001141285.1	19F	19F	Right	19F	Right	19F	Right
GCA_001141305.1	19F	19F	Right	19F	Right	19F	Right
GCA_001141325.1	23A	23A	Right	23A	Right	23A	Right
GCA_001141345.1	06A	06A	Right	06A|06B	Wrong	06A	Right
GCA_001141365.1	19F	19F	Right	19F	Right	19F	Right
GCA_001141485.2	15A	15A	Right	15A	Right	15A	Right
GCA_001141525.2	19A	19A	Right	19A	Right	19A	Right
GCA_001141545.1	15C	15C	Right	15B|15C	Wrong	15C	Right
GCA_001141565.1	07B	07B	Right	07B|40	Wrong	07B	Right
GCA_001141585.1	33B	33B	Right	33B|33D	Wrong	33B	Right
GCA_001141725.1	23F	23F	Right	23F	Right	23F	Right
GCA_001141745.1	19F	19F	Right	19F	Right	19F	Right
GCA_001141765.1	19F	19F	Right	19F	Right	19F	Right
GCA_001141785.1	07F	07F	Right	07F|07A	Wrong	07F	Right
GCA_001141865.1	34	34	Right	34	Right	34	Right
GCA_001141925.2	35F	35F	Right	35F	Right	35F	Right
GCA_001141965.1	15C	15C	Right	15B|15C	Wrong	15C	Right
GCA_001141985.1	17F	17F	Right	17F	Right	17F	Right
GCA_001142005.2	35B	35B	Right	35B|35D	Wrong	35B	Right
GCA_001142025.1	13	13	Right	13	Right	13	Right
GCA_001142045.2	15B|15C	15B	Right	15B|15C	Right	15B	Right
GCA_001142145.1	15A	15A	Right	15A	Right	15A	Right
GCA_001142185.1	23B	23B	Right	23B	Right	23B1	Wrong
GCA_001142205.1	06B	06B	Right	06|06E	Wrong	06E	Wrong
GCA_001142225.2	23A	23A	Right	23A	Right	23A	Right
GCA_001142245.1	06A	06A	Right	06A|06B	Wrong	06A	Right
GCA_001142265.1	19F	19F	Right	19F	Right	19F	Right
GCA_001142365.1	06B	06B	Right	06|06E	Wrong	06E	Wrong
GCA_001142385.1	19A	19A	Right	19A	Right	19A	Right
GCA_001142425.2	23F	23F	Right	23F	Right	23F	Right
GCA_001142445.1	06A	06A	Right	06A|06B	Wrong	06A	Right
GCA_001142485.1	3	3	Right	3	Right	3	Right
GCA_001142505.1	15A	15A	Right	15A	Right	15A	Right
GCA_001142545.2	19F	19F	Right	19F	Right	19F	Right
GCA_001142585.1	23F	23F	Right	23F	Right	23F	Right
GCA_001142685.1	19A	19A	Right	19A	Right	19A	Right
GCA_001142725.1	19F	19F	Right	19F	Right	19F	Right
GCA_001142765.1	06B	06B	Right	06|06E	Wrong	06E	Wrong
GCA_001142825.1	19F	19F	Right	19F	Right	19F	Right
GCA_001142845.3	19A	19A	Right	19A	Right	19A	Right
GCA_001142865.1	15A	15A	Right	15A	Right	15A	Right
GCA_001142945.1	06C	06C	Right	06A|06B|06C|06D	Wrong	06C	Right
GCA_001142985.1	19B	19B	Right	19B	Right	31	Wrong
GCA_001143085.2	35F	35F	Right	35F	Right	35F	Right
GCA_001143125.1	06A	06A	Right	06A|06B	Wrong	06A	Right
GCA_001143145.1	34	34	Right	34	Right	34	Right
GCA_001143185.1	19F	19F	Right	19F	Right	19F	Right
GCA_001143205.1	19F	19F	Right	19F	Right	19F	Right
GCA_001143225.1	28F	28F	Right	28F|28A	Wrong	28A	Wrong
GCA_001143245.2	19A	19A	Right	19A	Right	19A	Right
GCA_001143265.1	14	14	Right	14	Right	14	Right
GCA_001143285.1	23F	23F	Right	23F	Right	23F	Right
GCA_001143305.1	19F	19F	Right	19F	Right	19F	Right
GCA_001143325.1	35C	35B	Wrong	35B|35D	Wrong	35B	Wrong
GCA_001143385.1	19F	19F	Right	19F	Right	19F	Right
GCA_001143425.1	4	4	Right	4	Right	4	Right
GCA_001143465.1	06B	06B	Right	06|06E	Wrong	06E	Wrong
GCA_001143505.1	35F	35F	Right	35F	Right	35F	Right
GCA_001143525.1	06C	06C	Right	06A|06B|06C|06D	Wrong	06C	Right
GCA_001143565.1	06A	06C	Wrong	06A|06B|06C|06D	Wrong	06C	Wrong
GCA_001143665.1	06A	06A	Right	06A|06B	Wrong	06A	Right
GCA_001143685.1	3	3	Right	3	Right	3	Right
GCA_001143705.2	06A	06A	Right	06A|06B	Wrong	06A	Right
GCA_001143745.1	06A	06A	Right	06A|06B	Wrong	06A	Right
GCA_001143765.1	14	14	Right	14	Right	14	Right
GCA_001143885.2	14	14	Right	14	Right	14	Right
GCA_001143905.1	06A	06A	Right	06A|06B	Wrong	06A	Right
GCA_001143945.1	06B	06B	Right	06|06E	Wrong	06E	Wrong
GCA_001144085.1	14	14	Right	14	Right	14	Right
GCA_001144125.1	23F	23F	Right	23F	Right	23F	Right
GCA_001144165.1	23F	23F	Right	23F	Right	23F	Right
GCA_001144205.2	23F	23F	Right	23F	Right	23F	Right
GCA_001144265.2	22F	22F	Right	22F	Right	22F	Right
GCA_001144285.1	23F	23F	Right	23F	Right	23F	Right
GCA_001144365.1	06B	06B	Right	06|06E	Wrong	06E	Wrong
GCA_001144385.1	15C	15C	Right	15B|15C	Wrong	15C	Right
GCA_001144405.1	19F	19F	Right	19F	Right	19F	Right
GCA_001144425.2	15B|15C	15B|15C	Right	15B|15C	Right	15C	Right
GCA_001144445.1	34	34	Right	34	Right	34	Right
GCA_001144485.1	19F	19F	Right	19F	Right	19F	Right
GCA_001144505.1	19F	19F	Right	19F	Right	19F	Right
GCA_001144545.1	07B	07B	Right	07B|40	Wrong	07B	Right
GCA_001144565.1	19F	19F	Right	19F	Right	19F	Right
GCA_001144585.1	20	20	Right	20	Right	20	Right
GCA_001144625.1	14	14	Right	14	Right	14	Right
GCA_001144685.1	33D	33B	Wrong	33B|33D	Wrong	33B	Wrong
GCA_001144705.1	06B	06B	Right	06|06E	Wrong	06E	Wrong
GCA_001144725.1	16F	16F	Right	16F	Right	16F	Right
GCA_001144765.1	35C	35A	Wrong	35A|35C|42	Wrong	35A	Wrong
GCA_001144785.1	06A	06A	Right	06A|06B	Wrong	06A	Right
GCA_001144825.1	19F	19F	Right	19F	Right	19F	Right
GCA_001144845.1	35C	35B	Wrong	35B|35D	Wrong	35B	Wrong
GCA_001144885.1	5	5	Right	5	Right	5	Right
GCA_001144925.1	15B	15B	Right	15B|15C	Wrong	15B	Right
GCA_001144965.3	19A	19A	Right	19A	Right	19A	Right
GCA_001145025.2	07F	07F	Right	07F|07A	Wrong	07F	Right
GCA_001145085.1	19A	19A	Right	19A	Right	19A	Right
GCA_001145145.1	23F	23F	Right	23F	Right	23F	Right
GCA_001145185.1	14	14	Right	14	Right	14	Right
GCA_001145305.2	19A	19A	Right	19A	Right	19A	Right
GCA_001145325.1	06B	06B	Right	06|06E	Wrong	06E	Wrong
GCA_001145345.1	15C	15C	Right	15B|15C	Wrong	15C	Right
GCA_001145365.1	13	13	Right	13	Right	13	Right
GCA_001145405.1	06B	06B	Right	06|06E	Wrong	06E	Wrong
GCA_001145445.1	19F	19F	Right	19F	Right	19F	Right
GCA_001145465.2	34	34	Right	34	Right	34	Right
GCA_001145505.2	06A	06A	Right	06A|06B	Wrong	06A	Right
GCA_001145525.1	32F	32F	Right	32F|32A	Wrong	27	Wrong
GCA_001145605.1	19F	19F	Right	19F	Right	19F	Right
GCA_001145645.1	34	34	Right	34	Right	34	Right
GCA_001145665.1	06A	06A	Right	06A|06B	Wrong	06A	Right
GCA_001145705.1	15A	15A	Right	15A	Right	15A	Right
GCA_001145725.2	06C	06C	Right	06C|06D	Wrong	06C	Right
GCA_001145785.1	06B	06B	Right	06|06E	Wrong	06E	Wrong
GCA_001145825.1	19F	19F	Right	19F	Right	19F	Right
GCA_001145845.1	23F	23F	Right	23F	Right	23F	Right
GCA_001145865.1	18F	18F	Right	18B|18C|18F	Wrong	18F	Right
GCA_001145885.1	19F	19F	Right	19F	Right	19F	Right
GCA_001145925.1	19F	19F	Right	19F	Right	19F	Right
GCA_001146065.1	06A	06A	Right	06A|06B	Wrong	06A	Right
GCA_001146165.1	34	34	Right	34	Right	34	Right
GCA_001146245.1	19F	19F	Right	19F	Right	19F	Right
GCA_001146265.1	28F	28F	Right	28F|28A	Wrong	28A	Wrong
GCA_001146345.2	14	14	Right	14	Right	14	Right
GCA_001146385.1	10A	10A	Right	10A	Right	10A	Right
GCA_001146405.1	19F	19F	Right	19F	Right	19F	Right
GCA_001146425.1	06A	06A	Right	06A|06B	Wrong	06A	Right
GCA_001146445.1	34	34	Right	34	Right	34	Right
GCA_001146485.1	15B	15B	Right	15B|15C	Wrong	15B	Right
GCA_001146505.1	34	34	Right	34	Right	34	Right
GCA_001146525.2	15B|15C	15B|15C	Right	15B|15C	Right	15C	Right
GCA_001146565.1	19F	19F	Right	19F	Right	19F	Right
GCA_001146605.1	19F	19F	Right	19F	Right	19F	Right
GCA_001146665.2	35B	35B	Right	35B|35D	Wrong	35B	Right
GCA_001146705.1	13	13	Right	13	Right	13	Right
GCA_001146785.2	34	34	Right	34	Right	34	Right
GCA_001146805.1	33B	33B	Right	33B|33D	Wrong	33B	Right
GCA_001146865.2	15B|15C	15B	Right	15B|15C	Right	15B	Right
GCA_001146905.1	45	45	Right	45	Right	5	Wrong
GCA_001146945.1	14	14	Right	14	Right	14	Right
GCA_001146965.1	18C	18C	Right	18C|18B	Wrong	18C	Right
GCA_001147005.1	06B	06B	Right	06|06E	Wrong	06E	Wrong
GCA_001147105.1	23F	23F	Right	23F	Right	23F	Right
GCA_001147125.1	19F	19F	Right	19F	Right	19F	Right
GCA_001147225.1	15A	15A	Right	15A	Right	15A	Right
GCA_001147265.1	23F	23F	Right	23F	Right	23F	Right
GCA_001147285.1	06B	06B	Right	06|06E	Wrong	06E	Wrong
GCA_001147305.2	14	14	Right	14	Right	14	Right
GCA_001147325.1	22A	22A	Right	22A	Right	22A	Right
GCA_001147345.1	15B	15B	Right	15B|15C	Wrong	15B	Right
GCA_001147365.2	22F	22F	Right	22F	Right	22F	Right
GCA_001147385.1	06A	06A	Right	06A|06B	Wrong	06A	Right
GCA_001147405.1	19F	19F	Right	19F	Right	19F	Right
GCA_001147505.1	22F	22F	Right	22F	Right	22F	Right
GCA_001147525.1	14	14	Right	14	Right	14	Right
GCA_001147565.1	22F	22F	Right	22F	Right	22F	Right
GCA_001147585.2	23B	23B	Right	23B	Right	23B	Right
GCA_001147625.1	23A	23A	Right	23A	Right	23A	Right
GCA_001147645.1	23B	23B	Right	23B	Right	23B1	Wrong
GCA_001147665.1	06C	06C	Right	06A|06B|06C|06D	Wrong	06C	Right
GCA_001147685.1	09N	09L	Wrong	09N|09L	Wrong	09L	Wrong
GCA_001147705.1	19F	19F	Right	19F	Right	19F	Right
GCA_001147725.1	16F	16F	Right	16F	Right	16F	Right
GCA_001147805.1	19F	19F	Right	19F	Right	19F	Right
GCA_001147825.2	19A	19A	Right	19A	Right	19A	Right
GCA_001147845.1	14	14	Right	14	Right	14	Right
GCA_001147905.1	19F	19F	Right	19F	Right	19F	Right
GCA_001147925.1	24F	24F	Right	24F|24B	Wrong	24F	Right
GCA_001147945.1	14	14	Right	14	Right	14	Right
GCA_001147985.2	10A	10A	Right	10A	Right	10A	Right
GCA_001148145.1	34	34	Right	34	Right	34	Right
GCA_001148165.2	35B	35B	Right	35B|35D	Wrong	35B	Right
GCA_001148205.1	19F	19F	Right	19F	Right	19F	Right
GCA_001148245.1	19F	19F	Right	19F	Right	19F	Right
GCA_001148285.1	19F	19F	Right	19F	Right	19F	Right
GCA_001148365.1	23F	23F	Right	23F	Right	23F	Right
GCA_001148385.1	06B	06B	Right	06|06E	Wrong	06E	Wrong
GCA_001148445.2	22F	22F	Right	22F	Right	22F	Right
GCA_001148465.1	14	14	Right	14	Right	14	Right
GCA_001148485.1	19F	19F	Right	19F	Right	19F	Right
GCA_001148505.1	06B	06B	Right	06|06E	Wrong	06E	Wrong
GCA_001148545.1	07B	07C	Wrong	07C	Wrong	07C	Wrong
GCA_001148565.2	11A	11A	Right	11A|11D	Wrong	11A	Right
GCA_001148585.2	23F	23F	Right	23F	Right	23F	Right
GCA_001148605.1	19F	19F	Right	19F	Right	19F	Right
GCA_001148705.2	23F	23F	Right	23F	Right	23F	Right
GCA_001148725.1	40	40	Right	07B|40	Wrong	40	Right
GCA_001148745.1	19B	19B	Right	19B	Right	31	Wrong
GCA_001148765.1	15B	15B	Right	15B|15C	Wrong	15B	Right
GCA_001148785.1	06A	06A	Right	06A|06B	Wrong	06A	Right
GCA_001148865.2	19A	19A	Right	19A	Right	19A	Right
GCA_001148905.1	19F	19F	Right	19F	Right	19F	Right
GCA_001148925.2	35B	35B	Right	35B|35D	Wrong	35B	Right
GCA_001148965.1	23F	23F	Right	23F	Right	23F	Right
GCA_001148985.1	15B	15B	Right	15B|15C	Wrong	15B	Right
GCA_001149005.1	23F	23F	Right	23F	Right	23F	Right
GCA_001149065.1	22F	22F	Right	22F	Right	22F	Right
GCA_001149105.1	10B	10B	Right	10B	Right	10B	Right
GCA_001149205.1	06A	06A	Right	06A|06B	Wrong	06A	Right
GCA_001149245.1	19F	19F	Right	19F	Right	19F	Right
GCA_001149265.1	15A	15A	Right	15A	Right	15A	Right
GCA_001149305.1	11A	11A	Right	NA	Wrong	11A	Right
GCA_001149325.1	19F	19F	Right	19F	Right	19F	Right
GCA_001149345.1	14	14	Right	14	Right	14	Right
GCA_001149365.1	17F	17F	Right	17F	Right	17F	Right
GCA_001149405.1	10B	10B	Right	10B	Right	10B	Right
GCA_001149425.1	23F	23F	Right	23F	Right	23F	Right
GCA_001149465.1	34	34	Right	34	Right	34	Right
GCA_001149485.1	19F	19F	Right	19F	Right	19F	Right
GCA_001149505.1	09N	09N	Right	09N|09L	Wrong	09N	Right
GCA_001149525.1	23F	23F	Right	23F	Right	23F	Right
GCA_001149545.1	19F	19F	Right	19F	Right	19F	Right
GCA_001149565.1	3	3	Right	3	Right	3	Right
GCA_001149605.2	15B|15C	15C	Right	15B|15C	Right	15B	Right
GCA_001149625.1	14	14	Right	14	Right	14	Right
GCA_001149665.1	06A	06B	Wrong	06|006E	Wrong	06E	Wrong
GCA_001149705.2	11A	11A	Right	11A|11D	Wrong	11A	Right
GCA_001149725.1	06B	06B	Right	06|06E	Wrong	06E	Wrong
GCA_001149805.1	06B	06B	Right	06|06E	Wrong	06E	Wrong
GCA_001149965.1	19A	19A	Right	19A	Right	19A	Right
GCA_001149985.1	06B	06B	Right	06|06E	Wrong	06E	Wrong
GCA_001150005.1	06C	06C	Right	06A|06B|06C|06D	Wrong	06C	Right
GCA_001150025.1	06C	06C	Right	06A|06B|06C|06D	Wrong	06C	Right
GCA_001150045.1	23F	23F	Right	23F	Right	23F	Right
GCA_001150085.1	23F	23F	Right	23F	Right	23F	Right
GCA_001150105.1	10A	10A	Right	10A	Right	10A	Right
GCA_001150185.1	16F	16F	Right	16F	Right	16F	Right
GCA_001150205.1	06B	06B	Right	06|06E	Wrong	06E	Wrong
GCA_001150225.2	23A	23A	Right	23A	Right	23A	Right
GCA_001150245.1	09N	09L	Wrong	09N|09L	Wrong	09L	Wrong
GCA_001150265.1	34	34	Right	34	Right	34	Right
GCA_001150285.1	10B	10B	Right	10B	Right	10B	Right
GCA_001150405.2	06B	06B	Right	06A|06B	Wrong	06B	Right
GCA_001150425.2	3	3	Right	3	Right	3	Right
GCA_001150505.1	14	14	Right	14	Right	14	Right
GCA_001150545.1	06B	06B	Right	06|06E	Wrong	06E	Wrong
GCA_001150585.1	06A	06A	Right	06A|06B	Wrong	06A	Right
GCA_001150625.1	15B	15B	Right	15B|15C	Wrong	15B	Right
GCA_001150645.1	1	1	Right	1	Right	1	Right
GCA_001150705.1	06B	06B	Right	06|06E	Wrong	06E	Wrong
GCA_001150785.1	15A	15A	Right	15A	Right	15A	Right
GCA_001150825.1	11A	11A	Right	NA	Wrong	11A	Right
GCA_001150865.1	09N	09N	Right	09N|09L	Wrong	09N	Right
GCA_001150885.2	11A	11A	Right	11A|11D	Wrong	11A	Right
GCA_001150925.1	22F	22F	Right	22F	Right	22F	Right
GCA_001151065.2	10A	10A	Right	10A	Right	10A	Right
GCA_001151085.1	19F	19F	Right	19F	Right	19F	Right
GCA_001151165.2	35B	35B	Right	35B|35D	Wrong	35B	Right
GCA_001151245.1	15B	15B	Right	15B|15C	Wrong	15B	Right
GCA_001151305.1	14	14	Right	14	Right	14	Right
GCA_001151345.1	31	31	Right	31	Right	31	Right
GCA_001151405.1	11A	11A	Right	NA	Wrong	11A	Right
GCA_001151445.1	19F	19F	Right	19F	Right	19F	Right
GCA_001151485.1	11A	11A	Right	NA	Wrong	11A	Right
GCA_001151525.1	23F	23F	Right	23F	Right	23F	Right
GCA_001151545.1	06A	06A	Right	06A|06B	Wrong	06A	Right
GCA_001151585.1	23F	23F	Right	23F	Right	23F	Right
GCA_001151625.1	13	13	Right	13	Right	13	Right
GCA_001151645.1	06A	06A	Right	06A|06B	Wrong	06A	Right
GCA_001151745.1	19A	19A	Right	19A	Right	19A	Right
GCA_001151765.1	19F	19F	Right	19F	Right	19F	Right
GCA_001151805.1	19F	19F	Right	19F	Right	19F	Right
GCA_001151905.1	35C	35A	Wrong	35A|35C|42	Wrong	35A	Wrong
GCA_001152045.1	19F	19F	Right	19F	Right	19F	Right
GCA_001152065.1	06A	06B	Wrong	06|006E	Wrong	06E	Wrong
GCA_001152165.1	14	14	Right	14	Right	14	Right
GCA_001152225.2	34	34	Right	34	Right	34	Right
GCA_001152265.2	23F	23F	Right	23F	Right	23F	Right
GCA_001152305.1	11A	11A	Right	NA	Wrong	11A	Right
GCA_001152325.1	16F	16F	Right	16F	Right	16F	Right
GCA_001152365.1	06B	06B	Right	06|06E	Wrong	06E	Wrong
GCA_001152385.1	17F	17F	Right	17F	Right	17F	Right
GCA_001152425.1	32F	32F	Right	32F|32A	Wrong	27	Wrong
GCA_001152485.1	3	3	Right	3	Right	3	Right
GCA_001152525.2	15B|15C	15B	Right	15B|15C	Right	15B	Right
GCA_001152545.1	14	14	Right	14	Right	14	Right
GCA_001152585.1	23F	23F	Right	23F	Right	23F	Right
GCA_001152605.1	10B	10B	Right	10B	Right	10B	Right
GCA_001152645.1	28F	28A	Wrong	28F|28A	Wrong	28A	Wrong
GCA_001152745.1	10B	10B	Right	10B	Right	10B	Right
GCA_001152765.1	07F	07F	Right	07F|07A	Wrong	07F	Right
GCA_001152785.1	06B	06B	Right	06|06E	Wrong	06E	Wrong
GCA_001152805.1	06B	06B	Right	06|06E	Wrong	06E	Wrong
GCA_001152825.1	19F	19F	Right	19F	Right	19F	Right
GCA_001152865.1	19B	19B	Right	19B	Right	19F	Wrong
GCA_001152905.1	48	48	Right	48	Right	48	Right
GCA_001152925.2	06C	06C	Right	06C|06D	Wrong	06C	Right
GCA_001152965.1	19B	19B	Right	19B	Right	19F	Wrong
GCA_001152985.1	19F	19F	Right	19F	Right	19F	Right
GCA_001153045.1	3	3	Right	3	Right	3	Right
GCA_001153065.1	21	21	Right	21	Right	21	Right
GCA_001153165.1	10F	10F	Right	10F	Right	10F	Right
GCA_001153185.1	19B	19B	Right	19B	Right	19F	Wrong
GCA_001153205.2	11A	11A	Right	11A|11D	Wrong	11A	Right
GCA_001153225.1	23F	23F	Right	23F	Right	23F	Right
GCA_001153285.1	3	3	Right	3	Right	3	Right
GCA_001153305.1	23F	23F	Right	23F	Right	23F	Right
GCA_001153325.1	23F	23F	Right	23F	Right	23F	Right
GCA_001153345.1	10B	10A	Wrong	10A	Wrong	10A	Wrong
GCA_001153425.1	35F	35F	Right	35F	Right	35F	Right
GCA_001153445.1	23F	23F	Right	23F	Right	23F	Right
GCA_001153485.1	10F	10F	Right	10F	Right	10F	Right
GCA_001153525.1	19F	19F	Right	19F	Right	19F	Right
GCA_001153565.1	23F	23F	Right	23F	Right	23F	Right
GCA_001153685.1	11A	11A	Right	NA	Wrong	11A	Right
GCA_001153725.2	06A	06A	Right	06A|06B	Wrong	06A	Right
GCA_001153745.1	3	3	Right	3	Right	3	Right
GCA_001153765.2	10A	10A	Right	10A	Right	10A	Right
GCA_001153785.1	33C	33C	Right	33C	Right	33C	Right
GCA_001153805.1	06A	06A	Right	06A|06B	Wrong	06A	Right
GCA_001153885.1	19F	19F	Right	19F	Right	19F	Right
GCA_001153905.1	06A	06A	Right	06A|06B	Wrong	06A	Right
GCA_001153925.1	3	3	Right	3	Right	3	Right
GCA_001153965.1	19F	19F	Right	19F	Right	19F	Right
GCA_001154005.1	23F	23F	Right	23F	Right	23F	Right
GCA_001154065.2	35B	35B	Right	35B|35D	Wrong	35B	Right
GCA_001154085.1	3	3	Right	3	Right	3	Right
GCA_001154105.1	3	3	Right	3	Right	3	Right
GCA_001154145.1	06C	06C	Right	06A|06B|06C|06D	Wrong	06C	Right
GCA_001154245.1	20	20	Right	20	Right	20	Right
GCA_001154305.1	14	14	Right	14	Right	14	Right
GCA_001154345.1	3	3	Right	3	Right	3	Right
GCA_001154365.1	19B	19B	Right	19B	Right	31	Wrong
GCA_001154385.1	06C	06C	Right	06A|06B|06C|06D	Wrong	06C	Right
GCA_001154405.1	35F	35B	Wrong	35B|35D	Wrong	35B	Wrong
GCA_001154445.1	19A	19A	Right	19A	Right	19A	Right
GCA_001154465.1	37	37	Right	37	Right	37	Right
GCA_001154485.2	15A	15A	Right	15A	Right	15A	Right
GCA_001154505.1	31	31	Right	31	Right	31	Right
GCA_001154525.1	18C	18C	Right	18C|18B	Wrong	18C	Right
GCA_001154605.2	23F	23F	Right	23F	Right	23F	Right
GCA_001154645.1	06B	06B	Right	06|06E	Wrong	06E	Wrong
GCA_001154665.1	13	13	Right	13	Right	13	Right
GCA_001154705.1	11A	11A	Right	NA	Wrong	11A	Right
GCA_001154785.1	06B	06B	Right	06|06E	Wrong	06E	Wrong
GCA_001154805.1	15A	15A	Right	15A	Right	15A	Right
GCA_001154825.1	19F	19F	Right	19F	Right	19F	Right
GCA_001154905.2	15B|15C	15B|15C	Right	15B|15C	Right	15C	Right
GCA_001154925.1	19F	19F	Right	19F	Right	19F	Right
GCA_001154945.1	37	37	Right	37	Right	37	Right
GCA_001154965.1	06C	06C	Right	06A|06B|06C|06D	Wrong	06C	Right
GCA_001154985.1	18C	18C	Right	18C|18B	Wrong	18C	Right
GCA_001155065.2	07F	07F	Right	07F|07A	Wrong	07F	Right
GCA_001155145.1	10B	10B	Right	10B	Right	10B	Right
GCA_001155185.1	3	3	Right	3	Right	3	Right
GCA_001155205.1	3	3	Right	3	Right	3	Right
GCA_001155225.1	06B	06B	Right	06|06E	Wrong	06E	Wrong
GCA_001155285.1	23F	23F	Right	23F	Right	23F	Right
GCA_001155305.1	19F	19F	Right	19F	Right	19F	Right
GCA_001155325.1	19F	19F	Right	19F	Right	19F	Right
GCA_001155385.1	19A	19A	Right	19A	Right	19A	Right
GCA_001155425.2	15B|15C	15B	Right	15B|15C	Right	15B	Right
GCA_001155465.1	11A	11A	Right	NA	Wrong	11A	Right
GCA_001155505.1	06B	06B	Right	06|06E	Wrong	06E	Wrong
GCA_001155605.1	34	34	Right	34	Right	34	Right
GCA_001155625.1	19B	19B	Right	19B	Right	19F	Wrong
GCA_001155765.1	35F	35F	Right	35F	Right	35F	Right
GCA_001155825.1	35C	35B	Wrong	35B|35D	Wrong	35B	Wrong
GCA_001155885.1	48	48	Right	48	Right	48	Right
GCA_001155925.1	19F	19F	Right	19F	Right	19F	Right
GCA_001155945.1	06B	06B	Right	06|06E	Wrong	06E	Wrong
GCA_001156025.1	06A	06A	Right	06A|06B	Wrong	06A	Right
GCA_001156045.1	19F	19F	Right	19F	Right	19F	Right
GCA_001156085.1	34	34	Right	34	Right	34	Right
GCA_001156125.1	19A	19A	Right	19A	Right	19A	Right
GCA_001156145.1	06A	06A	Right	06A|06B	Wrong	06A	Right
GCA_001156165.1	34	34	Right	34	Right	34	Right
GCA_001156185.2	15B|15C	15B|15C	Right	15B|15C	Right	15C	Right
GCA_001156205.1	23F	23F	Right	23F	Right	23F	Right
GCA_001156225.1	13	13	Right	13	Right	13	Right
GCA_001156245.1	18A	18A	Right	18A	Right	18A	Right
GCA_001156485.1	31	31	Right	31	Right	31	Right
GCA_001156505.1	19F	19F	Right	19F	Right	19F	Right
GCA_001156525.1	23F	23F	Right	23F	Right	23F	Right
GCA_001156565.1	06C	06C	Right	06A|06B|06C|06D	Wrong	06C	Right
GCA_001156605.1	21	21	Right	21	Right	21	Right
GCA_001156645.2	06C	06C	Right	06C|06D	Wrong	06C	Right
GCA_001156665.1	48	48	Right	48	Right	48	Right
GCA_001156685.2	35B	35B	Right	35B|35D	Wrong	35B	Right
GCA_001156725.1	06A	06A	Right	06A|06B	Wrong	06A	Right
GCA_001156745.1	10B	10B	Right	10B	Right	10B	Right
GCA_001156765.1	35C	35B	Wrong	35B|35D	Wrong	35B	Wrong
GCA_001156785.1	23F	23F	Right	23F	Right	23F	Right
GCA_001156805.1	19F	19F	Right	19F	Right	19F	Right
GCA_001156825.1	19F	19F	Right	19F	Right	19F	Right
GCA_001156905.1	19F	19F	Right	19F	Right	19F	Right
GCA_001156925.1	10A	10A	Right	10A	Right	10A	Right
GCA_001156945.1	10B	10B	Right	10B	Right	10B	Right
GCA_001156985.2	15B|15C	15B|15C	Right	15B|15C	Right	15C	Right
GCA_001157005.1	19F	19F	Right	19F	Right	19F	Right
GCA_001157025.2	10A	10A	Right	10A	Right	10A	Right
GCA_001157125.1	06A	06B	Wrong	06|006E	Wrong	06E	Wrong
GCA_001157145.1	34	34	Right	34	Right	34	Right
GCA_001157225.2	19A	19A	Right	19A	Right	19A	Right
GCA_001157265.1	19F	19F	Right	19F	Right	19F	Right
GCA_001157285.1	21	21	Right	21	Right	21	Right
GCA_001157325.1	16F	16F	Right	16F	Right	16F	Right
GCA_001157365.1	23F	23F	Right	23F	Right	23F	Right
GCA_001157405.1	23F	23F	Right	23F	Right	23F	Right
GCA_001157425.2	15B|15C	15B|15C	Right	15B|15C	Right	15C	Right
GCA_001157465.2	15B|15C	15B|15C	Right	15B|15C	Right	15C	Right
GCA_001157545.1	06B	06B	Right	06|06E	Wrong	06E	Wrong
GCA_001157585.1	1	1	Right	1	Right	1	Right
GCA_001157625.1	06B	06B	Right	06|06E	Wrong	06E	Wrong
GCA_001157645.1	06B	06B	Right	06|06E	Wrong	06E	Wrong
GCA_001157705.1	40	40	Right	07B|40	Wrong	40	Right
GCA_001157785.1	06A	06A	Right	06A|06B	Wrong	06A	Right
GCA_001157825.1	06B	06B	Right	06|06E	Wrong	06E	Wrong
GCA_001157845.1	19F	19F	Right	19F	Right	19F	Right
GCA_001157905.2	34	34	Right	34	Right	34	Right
GCA_001157945.1	19F	19F	Right	19F	Right	19F	Right
GCA_001158045.1	14	14	Right	14	Right	14	Right
GCA_001158145.1	19A	19A	Right	19A	Right	19A	Right
GCA_001158185.1	06B	06B	Right	06|06E	Wrong	06E	Wrong
GCA_001158225.1	24F	24F	Right	24F|24B	Wrong	24F	Right
GCA_001158245.2	19F	19F	Right	19F	Right	19F	Right
GCA_001158265.1	10A	10A	Right	10A	Right	10A	Right
GCA_001158325.1	19F	19F	Right	19F	Right	19F	Right
GCA_001158345.2	15A	15A	Right	15A	Right	15A	Right
GCA_001158425.1	19F	19F	Right	19F	Right	19F	Right
GCA_001158465.1	31	31	Right	31	Right	31	Right
GCA_001158485.1	14	14	Right	14	Right	14	Right
GCA_001158525.2	06B	06B	Right	06|06E	Wrong	06E	Wrong
GCA_001158605.1	33B	33B	Right	33B|33D	Wrong	33B	Right
GCA_001158625.2	06A	06A	Right	06A|06B	Wrong	06A	Right
GCA_001158645.1	23A	23A	Right	23A	Right	23A	Right
GCA_001158665.1	07B	07B	Right	07B|40	Wrong	07B	Right
GCA_001158685.1	19F	19F	Right	19F	Right	19F	Right
GCA_001158705.2	23B	23B	Right	23B	Right	23B	Right
GCA_001158765.1	19F	19F	Right	19F	Right	19F	Right
GCA_001158785.2	15B|15C	15B	Right	15B|15C	Right	15B	Right
GCA_001158845.1	3	3	Right	3	Right	3	Right
GCA_001158865.1	16F	16F	Right	16F	Right	16F	Right
GCA_001158925.1	3	3	Right	3	Right	3	Right
GCA_001158965.1	34	34	Right	34	Right	34	Right
GCA_001159005.2	19A	19A	Right	19A	Right	19A	Right
GCA_001159045.1	23F	23F	Right	23F	Right	23F	Right
GCA_001159085.1	35C	35B	Wrong	35B|35D	Wrong	35B	Wrong
GCA_001159105.1	06B	06B	Right	06|06E	Wrong	06E	Wrong
GCA_001159125.1	19F	19F	Right	19F	Right	19F	Right
GCA_001159145.1	34	34	Right	34	Right	34	Right
GCA_001159205.1	34	34	Right	34	Right	34	Right
GCA_001159285.1	15A	15A	Right	15A	Right	15A	Right
GCA_001159305.2	10A	10A	Right	10A	Right	10A	Right
GCA_001159325.1	5	5	Right	5	Right	5	Right
GCA_001159345.1	15C	15C	Right	15B|15C	Wrong	15C	Right
GCA_001159485.1	34	34	Right	34	Right	34	Right
GCA_001159505.1	15B	15C	Wrong	15B|15C	Wrong	15C	Wrong
GCA_001159565.1	15B	15B	Right	15B|15C	Wrong	15B	Right
GCA_001159585.1	23F	23F	Right	23F	Right	23F	Right
GCA_001159625.1	06B	06B	Right	06|06E	Wrong	06E	Wrong
GCA_001159645.1	33B	33B	Right	33B|33D	Wrong	33B	Right
GCA_001159685.1	15B	15B	Right	15B|15C	Wrong	15B	Right
GCA_001159705.1	19F	19F	Right	19F	Right	19F	Right
GCA_001159725.1	33D	33B	Wrong	33B|33D	Wrong	33B	Wrong
GCA_001159765.1	09V	09V	Right	09A|09V	Wrong	09V	Right
GCA_001159845.1	19A	19A	Right	19A	Right	19A	Right
GCA_001159865.2	06A	06A	Right	06A|06B	Wrong	06A	Right
GCA_001159925.1	06B	06B	Right	06|06E	Wrong	06E	Wrong
GCA_001159965.1	14	14	Right	14	Right	14	Right
GCA_001160005.2	19A	19A	Right	19A	Right	19A	Right
GCA_001160025.1	06B	06B	Right	06|06E	Wrong	06E	Wrong
GCA_001160185.1	23F	23F	Right	23F	Right	23F	Right
GCA_001160205.2	22F	22F	Right	22F	Right	22F	Right
GCA_001160245.1	06B	06B	Right	06|06E	Wrong	06E	Wrong
GCA_001160305.1	3	3	Right	3	Right	3	Right
GCA_001160325.1	19F	19F	Right	19F	Right	19F	Right
GCA_001160405.1	11A	11A	Right	NA	Wrong	11A	Right
GCA_001160425.1	06B	06B	Right	06|06E	Wrong	06E	Wrong
GCA_001160465.1	19F	19F	Right	19F	Right	19F	Right
GCA_001160485.1	18A	18A	Right	18A	Right	18A	Right
GCA_001160505.1	34	34	Right	34	Right	34	Right
GCA_001160545.1	06C	06C	Right	06A|06B|06C|06D	Wrong	06C	Right
GCA_001160565.1	09N	09L	Wrong	09N|09L	Wrong	09L	Wrong
GCA_001160605.1	06C	06C	Right	06A|06B|06C|06D	Wrong	06C	Right
GCA_001160625.2	19F	19F	Right	19F	Right	19F	Right
GCA_001160745.2	35B	35B	Right	35B|35D	Wrong	35B	Right
GCA_001160765.1	19F	19F	Right	19F	Right	19F	Right
GCA_001160785.1	35C	35B	Wrong	35B|35D	Wrong	35B	Wrong
GCA_001160805.1	46	46	Right	12A|12B|44|46	Wrong	46	Right
GCA_001160925.1	3	3	Right	3	Right	3	Right
GCA_001160965.1	09N	09L	Wrong	09N|09L	Wrong	09L	Wrong
GCA_001161065.1	19F	19F	Right	19F	Right	19F	Right
GCA_001161085.1	23F	23F	Right	23F	Right	23F	Right
GCA_001161105.1	15C	15C	Right	15B|15C	Wrong	15C	Right
GCA_001161145.1	11A	11A	Right	NA	Wrong	11A	Right
GCA_001161165.1	46	46	Right	12A|12B|44|46	Wrong	46	Right
GCA_001161185.1	23F	23F	Right	23F	Right	23F	Right
GCA_001161205.1	06B	06B	Right	06|06E	Wrong	06E	Wrong
GCA_001161225.2	11A	11A	Right	11A|11D	Wrong	11A	Right
GCA_001161265.2	06A	06A	Right	06A|06B	Wrong	06A	Right
GCA_001161285.1	21	21	Right	21	Right	21	Right
GCA_001161305.3	09V	09V	Right	09A|09V	Wrong	09V	Right
GCA_001161405.1	06B	06B	Right	06|06E	Wrong	06E	Wrong
GCA_001161465.1	20	20	Right	20	Right	20	Right
GCA_001161485.1	13	13	Right	13	Right	13	Right
GCA_001161565.1	15A	15A	Right	15A	Right	15A	Right
GCA_001161585.1	19F	19F	Right	19F	Right	19F	Right
GCA_001161605.1	22F	22F	Right	22F	Right	22F	Right
GCA_001161665.1	4	4	Right	4	Right	4	Right
GCA_001161685.1	23F	23F	Right	23F	Right	23F	Right
GCA_001161705.1	18C	18C	Right	18C|18B	Wrong	18C	Right
GCA_001161725.1	14	14	Right	14	Right	14	Right
GCA_001161745.1	06C	06C	Right	06A|06B|06C|06D	Wrong	06C	Right
GCA_001161825.2	35B	35B	Right	35B|35D	Wrong	35B	Right
GCA_001161845.1	07B	07B	Right	07B|40	Wrong	07B	Right
GCA_001161865.2	17F	17F	Right	17F	Right	17F	Right
GCA_001161885.1	15B	15B	Right	15B|15C	Wrong	15B	Right
GCA_001161905.1	09N	09L	Wrong	09N|09L	Wrong	09L	Wrong
GCA_001162025.1	25F	25F	Right	25F|25A	Wrong	25F	Right
GCA_001162105.1	19F	19F	Right	19F	Right	19F	Right
GCA_001162125.1	06A	06A	Right	06A|06B	Wrong	06A	Right
GCA_001162165.1	23F	23F	Right	23F	Right	23F	Right
GCA_001162205.2	06A	06A	Right	06A|06B	Wrong	06A	Right
GCA_001162225.1	14	14	Right	14	Right	14	Right
GCA_001162245.1	34	34	Right	34	Right	34	Right
GCA_001162305.1	19F	19F	Right	19F	Right	19F	Right
GCA_001162365.1	15B	15B	Right	15B|15C	Wrong	15B	Right
GCA_001162385.2	23A	23A	Right	23A	Right	23A	Right
GCA_001162425.1	23A	23A	Right	23A	Right	23A	Right
GCA_001162465.1	06B	06B	Right	06|06E	Wrong	06E	Wrong
GCA_001162505.1	19F	19F	Right	19F	Right	19F	Right
GCA_001162525.1	09N	09N	Right	09N|09L	Wrong	09N	Right
GCA_001162545.1	18C	18C	Right	18C|18B	Wrong	18C	Right
GCA_001162565.1	14	14	Right	14	Right	14	Right
GCA_001162585.1	3	3	Right	3	Right	3	Right
GCA_001162625.1	06B	06B	Right	06|06E	Wrong	06E	Wrong
GCA_001162665.2	11A	11A	Right	11A|11D	Wrong	11A	Right
GCA_001162725.1	19F	19F	Right	19F	Right	19F	Right
GCA_001162765.1	34	34	Right	34	Right	34	Right
GCA_001162865.1	06A	06A	Right	06A|06B	Wrong	06A	Right
GCA_001162885.2	09N	09N	Right	09N|09L	Wrong	09N	Right
GCA_001163045.1	06A	06A	Right	06A|06B	Wrong	06A	Right
GCA_001163185.1	3	3	Right	3	Right	3	Right
GCA_001163205.1	14	14	Right	14	Right	14	Right
GCA_001163345.1	19F	19F	Right	19F	Right	19F	Right
GCA_001163425.1	19F	19F	Right	19F	Right	19F	Right
GCA_001163465.1	06B	06B	Right	06|06E	Wrong	06E	Wrong
GCA_001163505.1	34	34	Right	34	Right	34	Right
GCA_001163565.1	3	3	Right	3	Right	3	Right
GCA_001163585.1	23F	23F	Right	23F	Right	23F	Right
GCA_001163685.1	06B	06B	Right	06|06E	Wrong	06E	Wrong
GCA_001163705.1	35F	35F	Right	35F	Right	35F	Right
GCA_001163725.2	11A	11A	Right	11A|11D	Wrong	11A	Right
GCA_001163745.1	3	3	Right	3	Right	3	Right
GCA_001163765.1	18C	18C	Right	18C|18B	Wrong	18C	Right
GCA_001163805.1	10B	10B	Right	10B	Right	10B	Right
GCA_001163825.1	21	21	Right	21	Right	21	Right
GCA_001163845.2	07F	07F	Right	07F|07A	Wrong	07F	Right
GCA_001163865.1	13	13	Right	13	Right	13	Right
GCA_001163885.1	19A	19A	Right	19A	Right	19A	Right
GCA_001163905.1	15B	15B	Right	15B|15C	Wrong	15B	Right
GCA_001163965.1	3	3	Right	3	Right	3	Right
GCA_001164025.1	09V	09V	Right	09A|09V	Wrong	09V	Right
GCA_001164045.1	33B	33B	Right	33B|33D	Wrong	33B	Right
GCA_001164065.1	14	14	Right	14	Right	14	Right
GCA_001164085.1	15B	15C	Wrong	15B|15C	Wrong	15B	Right
GCA_001164105.1	06B	06B	Right	06|06E	Wrong	06E	Wrong
GCA_001164245.1	19F	19F	Right	19F	Right	19F	Right
GCA_001164265.1	06B	06B	Right	06|06E	Wrong	06E	Wrong
GCA_001164365.1	23F	23F	Right	23F	Right	23F	Right
GCA_001164385.1	19F	19F	Right	19F	Right	19F	Right
GCA_001164405.1	38	38	Right	25F|25A|38	Wrong	38	Right
GCA_001164425.1	19F	19F	Right	19F	Right	19F	Right
GCA_001164485.1	19F	19F	Right	19F	Right	19F	Right
GCA_001164565.1	15B	15B	Right	15B|15C	Wrong	15B	Right
GCA_001164585.1	14	14	Right	14	Right	14	Right
GCA_001164625.1	09N	09L	Wrong	09N|09L	Wrong	09L	Wrong
GCA_001164645.1	06B	06B	Right	06|06E	Wrong	06E	Wrong
GCA_001164705.1	06B	06B	Right	06|06E	Wrong	06E	Wrong
GCA_001164785.1	06A	06A	Right	06A|06B	Wrong	06A	Right
GCA_001164805.1	10A	10A	Right	10A	Right	10A	Right
GCA_001164825.2	22F	22F	Right	22F	Right	22F	Right
GCA_001164865.1	19B	19B	Right	19B	Right	31	Wrong
GCA_001164885.2	23A	23A	Right	23A	Right	23A	Right
GCA_001164925.2	33F	33F	Right	33F|33A	Wrong	33F	Right
GCA_001164985.1	06A	06A	Right	06A|06B	Wrong	06A	Right
GCA_001165065.2	19A	19A	Right	19A	Right	19A	Right
GCA_001165125.1	06B	06B	Right	06|06E	Wrong	06E	Wrong
GCA_001165165.1	23F	23F	Right	23F	Right	23F	Right
GCA_001165225.1	06B	06B	Right	06|06E	Wrong	06E	Wrong
GCA_001165285.1	35F	35F	Right	35F	Right	35F	Right
GCA_001165345.2	06A	06A	Right	06A|06B	Wrong	06A	Right
GCA_001165365.1	16F	16F	Right	16F	Right	16F	Right
GCA_001165385.1	35C	35B	Wrong	35B|35D	Wrong	35B	Wrong
GCA_001165405.2	06A	06A	Right	06A|06B	Wrong	06A	Right
GCA_001165425.1	06C	06C	Right	06A|06B|06C|06D	Wrong	06C	Right
GCA_001165445.1	19F	19F	Right	19F	Right	19F	Right
GCA_001165525.1	15B	15B	Right	15B|15C	Wrong	15B	Right
GCA_001165545.1	19F	19F	Right	19F	Right	19F	Right
GCA_001165565.1	10B	10F	Wrong	10F	Wrong	10F	Wrong
GCA_001165685.1	33F	33F	Right	NA	Wrong	35D	Wrong
GCA_001165725.3	19A	19A	Right	19A	Right	19A	Right
GCA_001165765.2	11A	11A	Right	11A|11D	Wrong	11A	Right
GCA_001165825.2	06A	06A	Right	06A|06B	Wrong	06A	Right
GCA_001165925.1	19A	19A	Right	19A	Right	19A	Right
GCA_001165965.2	38	38	Right	38	Right	38	Right
GCA_001166065.1	33D	33B	Wrong	33B|33D	Wrong	33B	Wrong
GCA_001166085.2	19A	19A	Right	19A	Right	19A	Right
GCA_001166105.1	4	4	Right	4	Right	4	Right
GCA_001166145.1	19F	19F	Right	19F	Right	19F	Right
GCA_001166165.1	19F	19F	Right	19F	Right	19F	Right
GCA_001166185.1	19F	19F	Right	19F	Right	19F	Right
GCA_001166225.1	21	21	Right	21	Right	21	Right
GCA_001166265.1	19F	19F	Right	19F	Right	19F	Right
GCA_001166365.1	24F	24F	Right	24F|24B	Wrong	24F	Right
GCA_001166385.1	15A	15A	Right	15A	Right	15A	Right
GCA_001166425.1	34	34	Right	34	Right	34	Right
GCA_001166465.1	23F	23F	Right	23F	Right	23F	Right
GCA_001166525.2	11A	11A	Right	11A|11D	Wrong	11A	Right
GCA_001166645.1	15A	15A	Right	15A	Right	15A	Right
GCA_001166685.1	06B	06B	Right	06|06E	Wrong	06E	Wrong
GCA_001166705.1	06B	06B	Right	06|06E	Wrong	06E	Wrong
GCA_001166765.1	19F	19F	Right	19F	Right	19F	Right
GCA_001166825.1	13	13	Right	13	Right	13	Right
GCA_001166865.1	06B	06B	Right	06|06E	Wrong	06E	Wrong
GCA_001166885.1	14	14	Right	14	Right	14	Right
GCA_001166925.1	06C	06C	Right	06A|06B|06C|06D	Wrong	06C	Right
GCA_001166945.1	06B	06B	Right	06|06E	Wrong	06E	Wrong
GCA_001167065.2	06C	06C	Right	06C|06D	Wrong	06C	Right
GCA_001167125.1	23F	23F	Right	23F	Right	23F	Right
GCA_001167205.1	06B	06B	Right	06|06E	Wrong	06E	Wrong
GCA_001167245.1	32A	32F	Wrong	32F|32A	Wrong	27	Wrong
GCA_001167325.1	37	37	Right	37	Right	37	Right
GCA_001167385.1	16F	16F	Right	16F	Right	16F	Right
GCA_001167445.1	06A	06A	Right	06A|06B	Wrong	06A	Right
GCA_001167465.1	19F	19F	Right	19F	Right	19F	Right
GCA_001167565.1	06A	06A	Right	06A|06B	Wrong	06A	Right
GCA_001167625.1	28F	28F	Right	28F|28A	Wrong	28A	Wrong
GCA_001167645.2	35B	35B	Right	35B|35D	Wrong	35B	Right
GCA_001167665.2	06C	06C	Right	06C|06D	Wrong	06C	Right
GCA_001167705.1	15B	15B	Right	15B|15C	Wrong	15B	Right
GCA_001167725.1	06C	06C	Right	06A|06B|06C|06D	Wrong	06C	Right
GCA_001167825.1	23F	23F	Right	23F	Right	23F	Right
GCA_001167885.2	19A	19A	Right	19A	Right	19A	Right
GCA_001167925.1	3	3	Right	3	Right	3	Right
GCA_001167945.1	06B	06B	Right	06|06E	Wrong	06E	Wrong
GCA_001167965.1	34	34	Right	34	Right	34	Right
GCA_001168025.1	22A	22A	Right	22A	Right	22A	Right
GCA_001168045.1	06B	06B	Right	06|06E	Wrong	06E	Wrong
GCA_001168065.1	06A	06A	Right	06A|06B	Wrong	06A	Right
GCA_001168085.1	15A	15A	Right	15A	Right	15A	Right
GCA_001168145.2	15B|15C	15B	Right	15B|15C	Right	15B	Right
GCA_001168165.1	06A	06A	Right	06A|06B	Wrong	06A	Right
GCA_001168205.2	11A	11A	Right	11A|11D	Wrong	11A	Right
GCA_001168225.1	19F	19F	Right	19F	Right	19F	Right
GCA_001168385.1	06A	06A	Right	06A|06B	Wrong	06A	Right
GCA_001168445.1	19F	19F	Right	19F	Right	19F	Right
GCA_001168465.2	14	14	Right	14	Right	14	Right
GCA_001168485.1	19F	19F	Right	19F	Right	19F	Right
GCA_001168605.1	31	31	Right	31	Right	31	Right
GCA_001168705.1	15A	15A	Right	15A	Right	15A	Right
GCA_001168765.1	06B	06B	Right	06|06E	Wrong	06E	Wrong
[truncated: 15,685 more rows]

## Sheet: Table S5
Table S5 The ST, cgST analysis for each genome by Pneumo-Typer
Strain	Profile	ST	cgST	Clone complex
GCA_000019985.1	aroE_1-gdh_5-gki_4-recP_5-spi_5-xpt_3-ddl_8	15	6451	CC 11
GCA_000173175.1	aroE_1-gdh_5-gki_4-recP_5-spi_5-xpt_27-ddl_8	13	42302	CC 11
GCA_000173195.1	aroE_1-gdh_5-gki_4-recP_5-spi_5-xpt_27-ddl_8	13	42301	CC 11
GCA_000173215.1	aroE_1-gdh_5-gki_4-recP_5-spi_5-xpt_27-ddl_8	13	Unknown/Novel	CC 11
GCA_000173275.1	aroE_1-gdh_5-gki_4-recP_5-spi_5-xpt_27-ddl_8	13	42303	CC 11
GCA_000173295.1	aroE_1-gdh_5-gki_4-recP_5-spi_5-xpt_27-ddl_8	13	Unknown/Novel	CC 11
GCA_000177775.1	aroE_1-gdh_5-gki_4-recP_5-spi_5-xpt_3-ddl_101	2011	Unknown/Novel	CC 11
GCA_000210935.1	aroE_1-gdh_5-gki_4-recP_5-spi_5-xpt_1-ddl_8	9	6455	CC 11
GCA_000232525.2	aroE_1-gdh_5-gki_4-recP_5-spi_5-xpt_27-ddl_8	13	Unknown/Novel	CC 11
GCA_000232885.2	aroE_1-gdh_5-gki_4-recP_5-spi_5-xpt_27-ddl_8	13	Unknown/Novel	CC 11
GCA_000252225.2	aroE_1-gdh_5-gki_4-recP_5-spi_5-xpt_1-ddl_8	9	Unknown/Novel	CC 11
GCA_001092165.2	aroE_1-gdh_5-gki_4-recP_5-spi_5-xpt_3-ddl_101	2011	2635	CC 11
GCA_001110245.1	aroE_1-gdh_5-gki_4-recP_5-spi_5-xpt_3-ddl_8	15	41751	CC 11
GCA_001168465.2	aroE_1-gdh_5-gki_4-recP_74-spi_5-xpt_1-ddl_8	1592	Unknown/Novel	CC 11
GCA_900016885.1	aroE_1-gdh_5-gki_4-recP_5-spi_5-xpt_3-ddl_8	15	Unknown/Novel	CC 11
GCA_900016955.1	aroE_1-gdh_5-gki_4-recP_5-spi_5-xpt_1-ddl_8	9	Unknown/Novel	CC 11
GCA_900017805.1	aroE_1-gdh_5-gki_1-recP_12-spi_17-xpt_3-ddl_8	1201	29299	CC 11
GCA_900018955.1	aroE_1-gdh_5-gki_4-recP_5-spi_5-xpt_1-ddl_8	9	29585	CC 11
GCA_900019645.1	aroE_1-gdh_5-gki_4-recP_5-spi_5-xpt_3-ddl_8	15	Unknown/Novel	CC 11
GCA_900019735.1	aroE_1-gdh_5-gki_4-recP_5-spi_5-xpt_1-ddl_8	9	Unknown/Novel	CC 11
GCA_900021385.1	aroE_1-gdh_5-gki_4-recP_5-spi_5-xpt_1-ddl_8	9	Unknown/Novel	CC 11
GCA_900021845.1	aroE_1-gdh_5-gki_4-recP_5-spi_5-xpt_1-ddl_8	9	Unknown/Novel	CC 11
GCA_900022215.1	aroE_1-gdh_5-gki_4-recP_5-spi_5-xpt_1-ddl_8	9	17062	CC 11
GCA_900022755.1	aroE_1-gdh_5-gki_4-recP_5-spi_5-xpt_1-ddl_8	9	Unknown/Novel	CC 11
GCA_900023005.1	aroE_1-gdh_5-gki_4-recP_5-spi_5-xpt_1-ddl_8	9	Unknown/Novel	CC 11
GCA_900023365.1	aroE_1-gdh_5-gki_4-recP_5-spi_5-xpt_1-ddl_8	9	Unknown/Novel	CC 11
GCA_900024025.1	aroE_1-gdh_5-gki_4-recP_5-spi_5-xpt_1-ddl_8	9	Unknown/Novel	CC 11
GCA_900024155.1	aroE_1-gdh_5-gki_4-recP_5-spi_5-xpt_1-ddl_8	9	Unknown/Novel	CC 11
GCA_900024715.1	aroE_1-gdh_5-gki_4-recP_5-spi_5-xpt_1-ddl_8	9	17960	CC 11
GCA_900026155.1	aroE_1-gdh_5-gki_4-recP_5-spi_5-xpt_3-ddl_8	15	17189	CC 11
GCA_900026395.1	aroE_1-gdh_5-gki_4-recP_5-spi_5-xpt_1-ddl_8	9	Unknown/Novel	CC 11
GCA_900026615.1	aroE_1-gdh_5-gki_4-recP_5-spi_5-xpt_1-ddl_8	9	Unknown/Novel	CC 11
GCA_900027095.1	aroE_1-gdh_5-gki_4-recP_5-spi_5-xpt_1-ddl_8	9	29254	CC 11
GCA_900027325.1	aroE_1-gdh_5-gki_4-recP_5-spi_5-xpt_1-ddl_8	9	Unknown/Novel	CC 11
GCA_900027395.1	aroE_1-gdh_5-gki_4-recP_5-spi_5-xpt_3-ddl_8	15	Unknown/Novel	CC 11
GCA_900028325.1	aroE_1-gdh_5-gki_1-recP_12-spi_17-xpt_3-ddl_8	1201	29299	CC 11
GCA_900028605.1	aroE_1-gdh_5-gki_4-recP_5-spi_5-xpt_1-ddl_8	9	Unknown/Novel	CC 11
GCA_900029005.1	aroE_1-gdh_5-gki_4-recP_5-spi_5-xpt_1-ddl_8	9	Unknown/Novel	CC 11
GCA_900029395.1	aroE_1-gdh_5-gki_1-recP_12-spi_17-xpt_3-ddl_8	1201	17090	CC 11
GCA_900029675.1	aroE_1-gdh_5-gki_1-recP_12-spi_17-xpt_3-ddl_8	1201	Unknown/Novel	CC 11
GCA_900030625.1	aroE_1-gdh_5-gki_4-recP_5-spi_5-xpt_1-ddl_8	9	29310	CC 11
GCA_900031085.1	aroE_1-gdh_5-gki_4-recP_5-spi_5-xpt_1-ddl_8	9	17462	CC 11
GCA_900033515.1	aroE_1-gdh_5-gki_4-recP_5-spi_5-xpt_1-ddl_8	9	Unknown/Novel	CC 11
GCA_900034015.1	aroE_1-gdh_5-gki_1-recP_12-spi_17-xpt_3-ddl_8	1201	Unknown/Novel	CC 11
GCA_900034145.1	aroE_1-gdh_5-gki_4-recP_5-spi_5-xpt_1-ddl_8	9	17087	CC 11
GCA_900036185.1	aroE_1-gdh_5-gki_4-recP_5-spi_5-xpt_1-ddl_8	9	Unknown/Novel	CC 11
GCA_900037195.1	aroE_1-gdh_5-gki_4-recP_5-spi_5-xpt_1-ddl_8	9	17462	CC 11
GCA_900037415.1	aroE_1-gdh_5-gki_4-recP_5-spi_5-xpt_1-ddl_8	9	Unknown/Novel	CC 11
GCA_900038615.1	aroE_1-gdh_5-gki_4-recP_5-spi_5-xpt_1-ddl_8	9	Unknown/Novel	CC 11
GCA_900042995.1	aroE_1-gdh_5-gki_4-recP_5-spi_5-xpt_1-ddl_8	9	29254	CC 11
GCA_900043185.1	aroE_1-gdh_5-gki_4-recP_5-spi_5-xpt_1-ddl_8	9	Unknown/Novel	CC 11
GCA_900045385.1	aroE_1-gdh_5-gki_4-recP_5-spi_5-xpt_1-ddl_8	9	Unknown/Novel	CC 11
GCA_900046655.1	aroE_1-gdh_5-gki_4-recP_5-spi_5-xpt_1-ddl_8	9	Unknown/Novel	CC 11
GCA_900047755.1	aroE_1-gdh_5-gki_4-recP_5-spi_5-xpt_1-ddl_8	9	17145	CC 11
GCA_900188795.1	aroE_1-gdh_5-gki_4-recP_5-spi_5-xpt_3-ddl_8	15	Unknown/Novel	CC 11
GCA_900189065.1	aroE_1-gdh_5-gki_4-recP_5-spi_5-xpt_1-ddl_8	9	Unknown/Novel	CC 11
GCA_900189825.1	aroE_1-gdh_5-gki_1-recP_12-spi_17-xpt_3-ddl_8	1201	Unknown/Novel	CC 11
GCA_900191845.1	aroE_1-gdh_5-gki_1-recP_12-spi_17-xpt_3-ddl_8	1201	Unknown/Novel	CC 11
GCA_900618555.1	aroE_1-gdh_5-gki_4-recP_5-spi_5-xpt_3-ddl_8	15	Unknown/Novel	CC 11
GCA_900622505.2	aroE_1-gdh_5-gki_4-recP_5-spi_5-xpt_3-ddl_8	15	Unknown/Novel	CC 11
GCA_900693055.1	aroE_1-gdh_5-gki_4-recP_5-spi_5-xpt_27-ddl_8	13	28924	CC 11
GCA_901215905.1	aroE_1-gdh_5-gki_4-recP_5-spi_5-xpt_3-ddl_8	15	28969	CC 11
GCA_901217495.1	aroE_1-gdh_5-gki_4-recP_5-spi_5-xpt_448-ddl_8	7448	Unknown/Novel	CC 11
GCA_901218055.1	aroE_1-gdh_5-gki_4-recP_5-spi_5-xpt_27-ddl_8	13	15507	CC 11
GCA_901218135.1	aroE_1-gdh_5-gki_4-recP_5-spi_5-xpt_3-ddl_5	1492	29028	CC 11
GCA_901218165.1	aroE_1-gdh_5-gki_4-recP_5-spi_5-xpt_27-ddl_8	13	15507	CC 11
GCA_901218535.1	aroE_1-gdh_5-gki_4-recP_5-spi_5-xpt_3-ddl_8	15	Unknown/Novel	CC 11
GCA_901219545.1	aroE_1-gdh_5-gki_4-recP_5-spi_5-xpt_3-ddl_426	6144	Unknown/Novel	CC 11
GCA_901219905.1	aroE_4-gdh_5-gki_4-recP_5-spi_5-xpt_3-ddl_8	2652	17720	CC 11
GCA_901219985.1	aroE_1-gdh_5-gki_4-recP_4-spi_5-xpt_3-ddl_1	9054	21639	CC 11
GCA_901220715.1	aroE_1-gdh_5-gki_4-recP_5-spi_5-xpt_27-ddl_8	13	Unknown/Novel	CC 11
GCA_901221445.1	aroE_1-gdh_5-gki_4-recP_5-spi_5-xpt_1-ddl_8	9	28989	CC 11
GCA_901221565.1	aroE_1-gdh_5-gki_4-recP_5-spi_5-xpt_1-ddl_8	9	Unknown/Novel	CC 11
GCA_901221865.1	aroE_1-gdh_5-gki_4-recP_5-spi_5-xpt_27-ddl_8	13	15536	CC 11
GCA_901221995.1	aroE_1-gdh_5-gki_4-recP_5-spi_5-xpt_3-ddl_5	1492	15716	CC 11
GCA_901222005.1	aroE_1-gdh_5-gki_4-recP_5-spi_5-xpt_3-ddl_8	15	28995	CC 11
GCA_901223365.1	aroE_1-gdh_5-gki_4-recP_5-spi_5-xpt_3-ddl_5	1492	15721	CC 11
GCA_901224455.1	aroE_1-gdh_5-gki_4-recP_5-spi_5-xpt_27-ddl_8	13	Unknown/Novel	CC 11
GCA_901224585.1	aroE_1-gdh_5-gki_4-recP_5-spi_5-xpt_3-ddl_5	1492	Unknown/Novel	CC 11
GCA_901224725.1	aroE_1-gdh_5-gki_4-recP_5-spi_5-xpt_27-ddl_8	13	Unknown/Novel	CC 11
GCA_901225205.1	aroE_1-gdh_5-gki_4-recP_5-spi_5-xpt_27-ddl_8	13	Unknown/Novel	CC 11
GCA_901225475.1	aroE_1-gdh_5-gki_4-recP_5-spi_5-xpt_3-ddl_5	1492	17978	CC 11
GCA_901225535.1	aroE_1-gdh_5-gki_4-recP_5-spi_5-xpt_3-ddl_8	15	29022	CC 11
GCA_901225915.1	aroE_1-gdh_5-gki_4-recP_5-spi_5-xpt_27-ddl_8	13	28950	CC 11
GCA_901226155.1	aroE_1-gdh_5-gki_4-recP_5-spi_5-xpt_575-ddl_8	9898	29054	CC 11
GCA_901226325.1	aroE_1-gdh_5-gki_4-recP_5-spi_5-xpt_27-ddl_8	13	28949	CC 11
GCA_901226525.1	aroE_1-gdh_5-gki_4-recP_5-spi_5-xpt_3-ddl_8	15	29014	CC 11
GCA_901226755.1	aroE_1-gdh_5-gki_4-recP_5-spi_5-xpt_27-ddl_8	13	28948	CC 11
GCA_901227005.1	aroE_1-gdh_5-gki_4-recP_5-spi_5-xpt_27-ddl_8	13	28935	CC 11
GCA_901227185.1	aroE_1-gdh_5-gki_4-recP_5-spi_5-xpt_27-ddl_8	13	Unknown/Novel	CC 11
GCA_901227775.1	aroE_4-gdh_5-gki_4-recP_5-spi_5-xpt_3-ddl_8	2652	15734	CC 11
GCA_901227945.1	aroE_1-gdh_5-gki_4-recP_5-spi_5-xpt_1-ddl_8	9	28918	CC 11
GCA_901228345.1	aroE_1-gdh_5-gki_4-recP_5-spi_5-xpt_1-ddl_8	9	Unknown/Novel	CC 11
GCA_901228915.1	aroE_1-gdh_5-gki_4-recP_5-spi_5-xpt_27-ddl_8	13	28947	CC 11
GCA_901229045.1	aroE_1-gdh_5-gki_4-recP_5-spi_5-xpt_1-ddl_8	9	29008	CC 11
GCA_901229065.1	aroE_1-gdh_5-gki_4-recP_5-spi_5-xpt_3-ddl_5	1492	15741	CC 11
GCA_901229735.1	aroE_1-gdh_5-gki_4-recP_5-spi_5-xpt_3-ddl_686	11675	17909	CC 11
GCA_901229885.1	aroE_1-gdh_5-gki_4-recP_5-spi_5-xpt_27-ddl_8	13	28946	CC 11
GCA_901230255.1	aroE_1-gdh_5-gki_4-recP_5-spi_5-xpt_27-ddl_8	13	28945	CC 11
GCA_901230285.1	aroE_1-gdh_5-gki_4-recP_5-spi_5-xpt_1-ddl_8	9	Unknown/Novel	CC 11
GCA_901230575.1	aroE_1-gdh_5-gki_4-recP_5-spi_5-xpt_27-ddl_8	13	Unknown/Novel	CC 11
GCA_901230925.1	aroE_1-gdh_5-gki_4-recP_5-spi_5-xpt_27-ddl_8	13	Unknown/Novel	CC 11
GCA_901231125.1	aroE_1-gdh_5-gki_4-recP_5-spi_5-xpt_1-ddl_8	9	29001	CC 11
GCA_901231135.1	aroE_4-gdh_5-gki_4-recP_5-spi_5-xpt_3-ddl_8	2652	17912	CC 11
GCA_901232295.1	aroE_1-gdh_5-gki_4-recP_5-spi_5-xpt_27-ddl_8	13	28943	CC 11
GCA_901233395.1	aroE_4-gdh_5-gki_4-recP_5-spi_5-xpt_3-ddl_8	2652	Unknown/Novel	CC 11
GCA_901233715.1	aroE_1-gdh_5-gki_4-recP_5-spi_5-xpt_1-ddl_8	9	Unknown/Novel	CC 11
GCA_901233945.1	aroE_1-gdh_5-gki_4-recP_5-spi_5-xpt_3-ddl_8	15	15297	CC 11
GCA_901234185.1	aroE_1-gdh_5-gki_4-recP_5-spi_5-xpt_1-ddl_8	9	Unknown/Novel	CC 11
GCA_901234555.1	aroE_1-gdh_5-gki_4-recP_5-spi_5-xpt_3-ddl_8	15	29013	CC 11
GCA_901234795.1	aroE_1-gdh_5-gki_4-recP_5-spi_5-xpt_1-ddl_8	9	28987	CC 11
GCA_901235155.1	aroE_1-gdh_5-gki_4-recP_5-spi_5-xpt_27-ddl_8	13	Unknown/Novel	CC 11
GCA_901235555.1	aroE_1-gdh_5-gki_4-recP_12-spi_5-xpt_27-ddl_8	16	28970	CC 11
GCA_901235895.1	aroE_1-gdh_5-gki_4-recP_5-spi_5-xpt_1-ddl_8	9	29005	CC 11
GCA_901236135.1	aroE_1-gdh_5-gki_4-recP_5-spi_5-xpt_3-ddl_14	721	29015	CC 11
GCA_901236525.1	aroE_1-gdh_5-gki_4-recP_5-spi_5-xpt_27-ddl_8	13	28958	CC 11
GCA_901236575.1	aroE_4-gdh_5-gki_4-recP_5-spi_5-xpt_3-ddl_8	2652	17839	CC 11
GCA_901236685.1	aroE_1-gdh_5-gki_4-recP_5-spi_5-xpt_1-ddl_8	9	29004	CC 11
GCA_901237065.1	aroE_1-gdh_5-gki_4-recP_5-spi_5-xpt_1-ddl_8	9	Unknown/Novel	CC 11
GCA_901237255.1	aroE_1-gdh_5-gki_4-recP_5-spi_5-xpt_1-ddl_8	9	29003	CC 11
GCA_901237585.1	aroE_1-gdh_5-gki_4-recP_5-spi_5-xpt_1-ddl_8	9	29002	CC 11
GCA_901237695.1	aroE_1-gdh_5-gki_4-recP_5-spi_5-xpt_704-ddl_5	12552	16043	CC 11
GCA_901237735.1	aroE_1-gdh_5-gki_4-recP_5-spi_5-xpt_27-ddl_8	13	28957	CC 11
GCA_901237825.1	aroE_1-gdh_5-gki_4-recP_5-spi_5-xpt_3-ddl_8	15	29012	CC 11
GCA_901237905.1	aroE_1-gdh_5-gki_4-recP_5-spi_5-xpt_27-ddl_8	13	28956	CC 11
GCA_901238575.1	aroE_4-gdh_5-gki_4-recP_5-spi_5-xpt_3-ddl_8	2652	Unknown/Novel	CC 11
GCA_901239885.1	aroE_1-gdh_5-gki_4-recP_12-spi_5-xpt_3-ddl_8	423	29023	CC 11
GCA_901241595.1	aroE_1-gdh_5-gki_4-recP_5-spi_5-xpt_1-ddl_8	9	Unknown/Novel	CC 11
GCA_901243495.1	aroE_1-gdh_5-gki_4-recP_5-spi_5-xpt_27-ddl_8	13	Unknown/Novel	CC 11
GCA_901243615.1	aroE_1-gdh_5-gki_4-recP_5-spi_5-xpt_27-ddl_8	13	Unknown/Novel	CC 11
GCA_901244825.1	aroE_4-gdh_5-gki_4-recP_5-spi_5-xpt_3-ddl_8	2652	15612	CC 11
GCA_901245105.1	aroE_1-gdh_5-gki_4-recP_5-spi_5-xpt_3-ddl_5	1492	Unknown/Novel	CC 11
GCA_901245175.1	aroE_1-gdh_567-gki_4-recP_5-spi_5-xpt_27-ddl_8	12699	29056	CC 11
GCA_901249105.1	aroE_4-gdh_5-gki_4-recP_5-spi_5-xpt_3-ddl_8	2652	19480	CC 11
GCA_901249625.1	aroE_4-gdh_5-gki_4-recP_5-spi_5-xpt_3-ddl_8	2652	15304	CC 11
GCA_901250465.1	aroE_1-gdh_5-gki_4-recP_5-spi_5-xpt_1-ddl_8	9	Unknown/Novel	CC 11
GCA_901251435.1	aroE_4-gdh_5-gki_4-recP_5-spi_5-xpt_3-ddl_8	2652	Unknown/Novel	CC 11
GCA_901252805.1	aroE_4-gdh_5-gki_4-recP_5-spi_5-xpt_3-ddl_8	2652	29042	CC 11
GCA_901255145.1	aroE_1-gdh_5-gki_4-recP_5-spi_5-xpt_3-ddl_5	1492	15821	CC 11
GCA_901255565.1	aroE_1-gdh_5-gki_4-recP_5-spi_5-xpt_3-ddl_5	1492	15402	CC 11
GCA_901256725.1	aroE_1-gdh_5-gki_4-recP_5-spi_5-xpt_3-ddl_5	1492	17776	CC 11
GCA_901256745.1	aroE_1-gdh_5-gki_4-recP_5-spi_5-xpt_27-ddl_8	13	Unknown/Novel	CC 11
GCA_901257185.1	aroE_1-gdh_5-gki_4-recP_5-spi_5-xpt_574-ddl_8	9899	29055	CC 11
GCA_901257855.1	aroE_1-gdh_5-gki_4-recP_5-spi_5-xpt_1-ddl_8	9	28965	CC 11
GCA_901257975.1	aroE_4-gdh_5-gki_4-recP_5-spi_5-xpt_3-ddl_8	2652	15325	CC 11
GCA_901258405.1	aroE_1-gdh_5-gki_4-recP_12-spi_5-xpt_3-ddl_8	423	Unknown/Novel	CC 11
GCA_901258705.1	aroE_1-gdh_5-gki_4-recP_5-spi_5-xpt_1-ddl_8	9	29018	CC 11
GCA_901259995.1	aroE_1-gdh_5-gki_4-recP_5-spi_5-xpt_1-ddl_8	9	Unknown/Novel	CC 11
GCA_901260255.1	aroE_1-gdh_5-gki_4-recP_12-spi_5-xpt_3-ddl_8	423	25425	CC 11
GCA_901260675.1	aroE_1-gdh_5-gki_4-recP_5-spi_5-xpt_3-ddl_5	1492	Unknown/Novel	CC 11
GCA_901261045.1	aroE_4-gdh_5-gki_4-recP_5-spi_5-xpt_3-ddl_8	2652	17537	CC 11
GCA_901262675.1	aroE_4-gdh_5-gki_4-recP_5-spi_5-xpt_3-ddl_8	2652	Unknown/Novel	CC 11
GCA_901262905.1	aroE_1-gdh_5-gki_4-recP_5-spi_5-xpt_3-ddl_8	15	29039	CC 11
GCA_901263085.1	aroE_4-gdh_5-gki_4-recP_5-spi_5-xpt_3-ddl_8	2652	15906	CC 11
GCA_901263215.1	aroE_1-gdh_5-gki_4-recP_5-spi_5-xpt_27-ddl_8	13	28933	CC 11
GCA_901264495.1	aroE_1-gdh_5-gki_4-recP_5-spi_5-xpt_220-ddl_5	10747	15912	CC 11
GCA_901264675.1	aroE_1-gdh_5-gki_4-recP_5-spi_5-xpt_27-ddl_8	13	28953	CC 11
GCA_901265255.1	aroE_1-gdh_5-gki_4-recP_5-spi_5-xpt_3-ddl_5	1492	Unknown/Novel	CC 11
GCA_901265455.1	aroE_1-gdh_5-gki_4-recP_5-spi_5-xpt_3-ddl_8	15	29038	CC 11
GCA_901266555.1	aroE_1-gdh_5-gki_4-recP_12-spi_5-xpt_3-ddl_8	423	Unknown/Novel	CC 11
GCA_901267045.1	aroE_4-gdh_5-gki_4-recP_5-spi_5-xpt_3-ddl_8	2652	15923	CC 11
GCA_901267085.1	aroE_1-gdh_5-gki_4-recP_5-spi_5-xpt_27-ddl_8	13	Unknown/Novel	CC 11
GCA_901267095.1	aroE_1-gdh_5-gki_4-recP_5-spi_5-xpt_3-ddl_8	15	28967	CC 11
GCA_901269285.1	aroE_4-gdh_5-gki_4-recP_5-spi_5-xpt_3-ddl_8	2652	Unknown/Novel	CC 11
GCA_901270055.1	aroE_1-gdh_5-gki_4-recP_5-spi_5-xpt_3-ddl_8	15	29036	CC 11
GCA_901270625.1	aroE_1-gdh_5-gki_4-recP_5-spi_5-xpt_27-ddl_8	13	28941	CC 11
GCA_901270995.1	aroE_4-gdh_5-gki_4-recP_5-spi_5-xpt_3-ddl_8	2652	Unknown/Novel	CC 11
GCA_901274585.1	aroE_1-gdh_5-gki_4-recP_5-spi_5-xpt_1-ddl_8	9	29017	CC 11
GCA_901277125.1	aroE_1-gdh_5-gki_4-recP_5-spi_5-xpt_3-ddl_345	4191	18025	CC 11
GCA_901278185.1	aroE_4-gdh_5-gki_4-recP_5-spi_5-xpt_3-ddl_8	2652	15844	CC 11
GCA_901278355.1	aroE_4-gdh_5-gki_4-recP_5-spi_5-xpt_3-ddl_8	2652	Unknown/Novel	CC 11
GCA_901278665.1	aroE_4-gdh_5-gki_4-recP_5-spi_5-xpt_3-ddl_8	2652	15854	CC 11
GCA_901279015.1	aroE_4-gdh_5-gki_4-recP_5-spi_5-xpt_3-ddl_8	2652	Unknown/Novel	CC 11
GCA_901279115.1	aroE_1-gdh_5-gki_4-recP_5-spi_5-xpt_3-ddl_5	1492	15859	CC 11
GCA_901279395.1	aroE_4-gdh_5-gki_4-recP_5-spi_5-xpt_3-ddl_8	2652	Unknown/Novel	CC 11
GCA_901280195.1	aroE_1-gdh_5-gki_4-recP_5-spi_5-xpt_3-ddl_5	1492	15644	CC 11
GCA_901280255.1	aroE_1-gdh_5-gki_4-recP_5-spi_5-xpt_3-ddl_5	1492	15645	CC 11
GCA_901280295.1	aroE_1-gdh_5-gki_4-recP_5-spi_5-xpt_3-ddl_5	1492	29026	CC 11
GCA_901280625.1	aroE_1-gdh_5-gki_4-recP_5-spi_5-xpt_3-ddl_5	1492	16012	CC 11
GCA_901281095.1	aroE_4-gdh_5-gki_4-recP_5-spi_5-xpt_3-ddl_8	2652	16088	CC 11
GCA_901281225.1	aroE_4-gdh_5-gki_4-recP_5-spi_5-xpt_3-ddl_8	2652	Unknown/Novel	CC 11
GCA_901281555.1	aroE_1-gdh_5-gki_4-recP_5-spi_5-xpt_3-ddl_5	1492	29027	CC 11
GCA_901281595.1	aroE_4-gdh_5-gki_4-recP_5-spi_5-xpt_3-ddl_8	2652	Unknown/Novel	CC 11
GCA_901281755.1	aroE_1-gdh_5-gki_4-recP_5-spi_5-xpt_3-ddl_5	1492	16027	CC 11
GCA_901282445.1	aroE_1-gdh_5-gki_4-recP_5-spi_5-xpt_3-ddl_5	1492	Unknown/Novel	CC 11
GCA_901282685.1	aroE_4-gdh_5-gki_4-recP_5-spi_5-xpt_3-ddl_8	2652	Unknown/Novel	CC 11
GCA_901284545.1	aroE_1-gdh_5-gki_4-recP_5-spi_5-xpt_1-ddl_8	9	28913	CC 11
GCA_901284925.1	aroE_1-gdh_5-gki_4-recP_5-spi_5-xpt_3-ddl_8	15	Unknown/Novel	CC 11
GCA_901285055.1	aroE_1-gdh_5-gki_4-recP_5-spi_5-xpt_1-ddl_8	9	28912	CC 11
GCA_901286695.1	aroE_1-gdh_5-gki_4-recP_5-spi_5-xpt_1-ddl_8	9	Unknown/Novel	CC 11
GCA_901286815.1	aroE_1-gdh_5-gki_4-recP_5-spi_5-xpt_1-ddl_8	9	Unknown/Novel	CC 11
GCA_901286865.1	aroE_1-gdh_5-gki_4-recP_5-spi_5-xpt_3-ddl_8	15	Unknown/Novel	CC 11
GCA_901286875.1	aroE_1-gdh_5-gki_4-recP_5-spi_5-xpt_1-ddl_8	9	28983	CC 11
GCA_901287185.1	aroE_1-gdh_5-gki_4-recP_5-spi_5-xpt_1-ddl_8	9	28982	CC 11
GCA_901287195.1	aroE_1-gdh_5-gki_4-recP_5-spi_5-xpt_1-ddl_8	9	29000	CC 11
GCA_901287205.1	aroE_1-gdh_5-gki_4-recP_5-spi_5-xpt_3-ddl_8	15	29048	CC 11
GCA_901287215.1	aroE_1-gdh_5-gki_4-recP_5-spi_5-xpt_1-ddl_8	9	28981	CC 11
GCA_901287395.1	aroE_1-gdh_5-gki_4-recP_5-spi_5-xpt_3-ddl_8	15	29047	CC 11
GCA_901288865.1	aroE_1-gdh_5-gki_4-recP_5-spi_5-xpt_3-ddl_8	15	29032	CC 11
GCA_901290095.1	aroE_1-gdh_5-gki_1-recP_12-spi_17-xpt_3-ddl_8	1201	20979	CC 11
GCA_901290445.1	aroE_1-gdh_5-gki_4-recP_1-spi_5-xpt_3-ddl_8	25	28972	CC 11
GCA_901291125.1	aroE_1-gdh_5-gki_4-recP_1-spi_5-xpt_3-ddl_8	25	28971	CC 11
GCA_901291325.1	aroE_1-gdh_5-gki_4-recP_5-spi_5-xpt_3-ddl_8	15	28962	CC 11
GCA_901291345.1	aroE_1-gdh_5-gki_4-recP_5-spi_5-xpt_3-ddl_8	15	28964	CC 11
GCA_901292295.1	aroE_1-gdh_5-gki_4-recP_5-spi_5-xpt_3-ddl_8	15	28963	CC 11
GCA_901292535.1	aroE_1-gdh_5-gki_4-recP_5-spi_5-xpt_3-ddl_8	15	28961	CC 11
GCA_901292615.1	aroE_1-gdh_5-gki_4-recP_5-spi_5-xpt_1-ddl_8	9	28917	CC 11
GCA_901294125.1	aroE_1-gdh_5-gki_4-recP_5-spi_5-xpt_27-ddl_8	13	28925	CC 11
GCA_901294355.1	aroE_1-gdh_5-gki_4-recP_5-spi_5-xpt_27-ddl_8	13	28924	CC 11
GCA_901299495.1	aroE_1-gdh_5-gki_4-recP_5-spi_5-xpt_3-ddl_8	15	28960	CC 11
GCA_901301375.1	aroE_1-gdh_5-gki_4-recP_5-spi_5-xpt_1-ddl_8	9	28974	CC 11
GCA_901301705.1	aroE_1-gdh_5-gki_4-recP_5-spi_5-xpt_1-ddl_8	9	28998	CC 11
GCA_901302215.1	aroE_1-gdh_5-gki_4-recP_5-spi_5-xpt_1-ddl_8	9	Unknown/Novel	CC 11
GCA_901302365.1	aroE_1-gdh_5-gki_4-recP_5-spi_5-xpt_1-ddl_8	9	Unknown/Novel	CC 11
GCA_901302875.1	aroE_1-gdh_5-gki_4-recP_5-spi_5-xpt_1-ddl_8	9	28979	CC 11
GCA_901304535.1	aroE_1-gdh_5-gki_4-recP_5-spi_5-xpt_1-ddl_8	9	28978	CC 11
GCA_901304765.1	aroE_1-gdh_5-gki_4-recP_5-spi_5-xpt_27-ddl_8	13	28931	CC 11
GCA_901305005.1	aroE_1-gdh_5-gki_4-recP_5-spi_5-xpt_27-ddl_8	13	28930	CC 11
GCA_901305475.1	aroE_1-gdh_5-gki_4-recP_5-spi_5-xpt_27-ddl_8	13	28929	CC 11
GCA_901305545.1	aroE_1-gdh_5-gki_4-recP_5-spi_5-xpt_1-ddl_8	9	28919	CC 11
GCA_901305645.1	aroE_1-gdh_5-gki_4-recP_5-spi_5-xpt_27-ddl_8	13	28928	CC 11
GCA_901305745.1	aroE_1-gdh_5-gki_4-recP_5-spi_5-xpt_3-ddl_8	15	Unknown/Novel	CC 11
GCA_901306385.1	aroE_4-gdh_5-gki_4-recP_5-spi_5-xpt_3-ddl_8	2652	Unknown/Novel	CC 11
GCA_901307015.1	aroE_1-gdh_5-gki_4-recP_5-spi_5-xpt_27-ddl_8	13	28927	CC 11
GCA_901307475.1	aroE_4-gdh_5-gki_4-recP_5-spi_5-xpt_3-ddl_542	10814	Unknown/Novel	CC 11
GCA_901308835.1	aroE_1-gdh_5-gki_4-recP_5-spi_5-xpt_3-ddl_5	1492	16391	CC 11
GCA_901308985.1	aroE_4-gdh_5-gki_4-recP_5-spi_5-xpt_3-ddl_8	2652	16392	CC 11
GCA_901309175.1	aroE_1-gdh_5-gki_4-recP_5-spi_5-xpt_27-ddl_8	13	Unknown/Novel	CC 11
GCA_901309525.1	aroE_1-gdh_5-gki_4-recP_5-spi_5-xpt_3-ddl_676	12232	16395	CC 11
GCA_901312785.1	aroE_1-gdh_5-gki_4-recP_5-spi_5-xpt_1-ddl_8	9	28994	CC 11
GCA_901312865.1	aroE_1-gdh_5-gki_4-recP_5-spi_5-xpt_1-ddl_8	9	29011	CC 11
GCA_901312875.1	aroE_1-gdh_5-gki_4-recP_5-spi_5-xpt_1-ddl_8	9	Unknown/Novel	CC 11
GCA_901313165.1	aroE_1-gdh_5-gki_4-recP_5-spi_5-xpt_1-ddl_8	9	Unknown/Novel	CC 11
GCA_901313205.1	aroE_1-gdh_5-gki_4-recP_5-spi_5-xpt_3-ddl_8	15	29025	CC 11
GCA_901313325.1	aroE_1-gdh_5-gki_4-recP_5-spi_5-xpt_3-ddl_8	15	Unknown/Novel	CC 11
GCA_901313405.1	aroE_1-gdh_5-gki_4-recP_5-spi_5-xpt_1-ddl_8	9	Unknown/Novel	CC 11
GCA_901313705.1	aroE_1-gdh_5-gki_4-recP_5-spi_5-xpt_1-ddl_8	9	28990	CC 11
GCA_901313755.1	aroE_1-gdh_5-gki_4-recP_5-spi_5-xpt_3-ddl_8	15	28996	CC 11
GCA_901313835.1	aroE_1-gdh_5-gki_4-recP_5-spi_5-xpt_1-ddl_8	9	Unknown/Novel	CC 11
GCA_901314245.1	aroE_4-gdh_5-gki_4-recP_5-spi_5-xpt_3-ddl_8	2652	16420	CC 11
GCA_901314415.1	aroE_1-gdh_5-gki_4-recP_5-spi_5-xpt_3-ddl_8	15	29050	CC 11
GCA_901314535.1	aroE_4-gdh_5-gki_4-recP_5-spi_5-xpt_3-ddl_8	2652	Unknown/Novel	CC 11
GCA_901315185.1	aroE_1-gdh_5-gki_4-recP_5-spi_5-xpt_3-ddl_8	15	29049	CC 11
GCA_901316775.1	aroE_4-gdh_5-gki_4-recP_5-spi_5-xpt_3-ddl_8	2652	16443	CC 11
GCA_901318435.1	aroE_1-gdh_5-gki_4-recP_5-spi_5-xpt_1-ddl_8	9	28915	CC 11
GCA_901319365.1	aroE_1-gdh_5-gki_4-recP_5-spi_5-xpt_1-ddl_8	9	28914	CC 11
GCA_901320445.1	aroE_4-gdh_5-gki_4-recP_5-spi_5-xpt_3-ddl_8	2652	16482	CC 11
GCA_901323905.1	aroE_1-gdh_5-gki_4-recP_5-spi_5-xpt_3-ddl_5	1492	19064	CC 11
GCA_901324275.1	aroE_1-gdh_5-gki_4-recP_5-spi_5-xpt_3-ddl_5	1492	Unknown/Novel	CC 11
GCA_901325915.1	aroE_1-gdh_5-gki_4-recP_5-spi_5-xpt_1-ddl_8	9	29021	CC 11
GCA_901325965.1	aroE_1-gdh_5-gki_4-recP_5-spi_5-xpt_3-ddl_8	15	29046	CC 11
GCA_901326025.1	aroE_1-gdh_381-gki_4-recP_5-spi_5-xpt_3-ddl_8	8753	Unknown/Novel	CC 11
GCA_901326115.1	aroE_1-gdh_5-gki_4-recP_5-spi_5-xpt_1-ddl_8	9	Unknown/Novel	CC 11
GCA_901326245.1	aroE_56-gdh_5-gki_4-recP_5-spi_5-xpt_1-ddl_8	984	29016	CC 11
GCA_901326315.1	aroE_1-gdh_5-gki_4-recP_5-spi_5-xpt_1-ddl_8	9	28999	CC 11
GCA_901326345.1	aroE_1-gdh_5-gki_4-recP_5-spi_5-xpt_3-ddl_8	15	Unknown/Novel	CC 11
GCA_901326425.1	aroE_1-gdh_5-gki_4-recP_5-spi_5-xpt_1-ddl_8	9	Unknown/Novel	CC 11
GCA_901328275.1	aroE_1-gdh_613-gki_4-recP_5-spi_5-xpt_3-ddl_8	13931	29057	CC 11
GCA_901329685.1	aroE_1-gdh_5-gki_4-recP_5-spi_5-xpt_1-ddl_8	9	28916	CC 11
GCA_901333685.1	aroE_1-gdh_5-gki_4-recP_5-spi_5-xpt_1-ddl_8	9	28977	CC 11
GCA_901333765.1	aroE_1-gdh_5-gki_4-recP_5-spi_5-xpt_3-ddl_8	15	29031	CC 11
GCA_901334185.1	aroE_1-gdh_5-gki_4-recP_5-spi_5-xpt_3-ddl_8	15	29045	CC 11
GCA_901334385.1	aroE_1-gdh_5-gki_4-recP_5-spi_5-xpt_3-ddl_8	15	29029	CC 11
GCA_901334515.1	aroE_1-gdh_5-gki_4-recP_5-spi_5-xpt_1-ddl_8	9	28976	CC 11
GCA_901335055.1	aroE_1-gdh_5-gki_4-recP_5-spi_5-xpt_1-ddl_8	9	Unknown/Novel	CC 11
GCA_901340115.1	aroE_1-gdh_5-gki_4-recP_5-spi_5-xpt_27-ddl_8	13	28932	CC 11
GCA_907169245.1	aroE_1-gdh_5-gki_4-recP_5-spi_5-xpt_27-ddl_8	13	34016	CC 11
GCA_907169255.1	aroE_1-gdh_5-gki_4-recP_5-spi_5-xpt_27-ddl_8	13	31455	CC 11
GCA_907169275.1	aroE_1-gdh_5-gki_4-recP_5-spi_5-xpt_27-ddl_8	13	31381	CC 11
GCA_907169285.1	aroE_1-gdh_5-gki_4-recP_5-spi_5-xpt_27-ddl_8	13	Unknown/Novel	CC 11
GCA_907169295.1	aroE_1-gdh_5-gki_4-recP_5-spi_5-xpt_27-ddl_8	13	Unknown/Novel	CC 11
GCA_907169305.1	aroE_1-gdh_5-gki_4-recP_5-spi_5-xpt_27-ddl_8	13	Unknown/Novel	CC 11
GCA_907169315.1	aroE_1-gdh_5-gki_4-recP_5-spi_5-xpt_27-ddl_8	13	Unknown/Novel	CC 11
GCA_907169325.1	aroE_1-gdh_5-gki_4-recP_5-spi_5-xpt_27-ddl_8	13	Unknown/Novel	CC 11
GCA_907169335.1	aroE_1-gdh_5-gki_4-recP_5-spi_5-xpt_27-ddl_8	13	31397	CC 11
GCA_907169345.1	aroE_1-gdh_5-gki_4-recP_5-spi_5-xpt_27-ddl_8	13	31401	CC 11
GCA_907169355.1	aroE_1-gdh_5-gki_4-recP_5-spi_5-xpt_27-ddl_8	13	35430	CC 11
GCA_907169365.1	aroE_1-gdh_5-gki_4-recP_5-spi_5-xpt_27-ddl_8	13	31456	CC 11
GCA_907169385.1	aroE_1-gdh_5-gki_4-recP_5-spi_5-xpt_27-ddl_8	13	31452	CC 11
GCA_907169395.1	aroE_1-gdh_5-gki_4-recP_5-spi_5-xpt_27-ddl_8	13	Unknown/Novel	CC 11
GCA_907169405.1	aroE_1-gdh_5-gki_4-recP_5-spi_5-xpt_27-ddl_8	13	35488	CC 11
GCA_907169425.1	aroE_1-gdh_5-gki_4-recP_5-spi_5-xpt_27-ddl_8	13	35453	CC 11
GCA_907169435.1	aroE_1-gdh_5-gki_4-recP_5-spi_5-xpt_27-ddl_8	13	Unknown/Novel	CC 11
GCA_907169445.1	aroE_1-gdh_5-gki_4-recP_5-spi_5-xpt_27-ddl_8	13	32329	CC 11
GCA_907169455.1	aroE_1-gdh_5-gki_4-recP_5-spi_5-xpt_27-ddl_8	13	Unknown/Novel	CC 11
GCA_907169465.1	aroE_1-gdh_5-gki_4-recP_5-spi_5-xpt_27-ddl_8	13	35447	CC 11
GCA_907169475.1	aroE_1-gdh_5-gki_4-recP_5-spi_5-xpt_27-ddl_8	13	32334	CC 11
GCA_907169485.1	aroE_1-gdh_5-gki_4-recP_5-spi_5-xpt_27-ddl_8	13	32312	CC 11
GCA_907169495.1	aroE_1-gdh_5-gki_4-recP_5-spi_5-xpt_27-ddl_8	13	32310	CC 11
GCA_907169505.1	aroE_1-gdh_5-gki_4-recP_5-spi_5-xpt_27-ddl_8	13	32315	CC 11
GCA_907169515.1	aroE_1-gdh_5-gki_4-recP_5-spi_5-xpt_27-ddl_8	13	32332	CC 11
GCA_907169525.1	aroE_1-gdh_5-gki_4-recP_5-spi_5-xpt_3-ddl_5	1492	32125	CC 11
GCA_907169535.1	aroE_1-gdh_5-gki_4-recP_5-spi_5-xpt_3-ddl_8	15	33607	CC 11
GCA_907169545.1	aroE_1-gdh_5-gki_4-recP_5-spi_5-xpt_3-ddl_8	15	33557	CC 11
GCA_907169555.1	aroE_1-gdh_5-gki_4-recP_5-spi_5-xpt_3-ddl_8	15	33727	CC 11
GCA_907169565.1	aroE_1-gdh_5-gki_4-recP_5-spi_5-xpt_27-ddl_8	13	32321	CC 11
GCA_907169575.1	aroE_1-gdh_5-gki_4-recP_5-spi_5-xpt_3-ddl_8	15	31988	CC 11
GCA_907169585.1	aroE_1-gdh_5-gki_4-recP_5-spi_5-xpt_3-ddl_8	15	Unknown/Novel	CC 11
GCA_907169595.1	aroE_1-gdh_5-gki_4-recP_5-spi_5-xpt_3-ddl_8	15	Unknown/Novel	CC 11
GCA_907169605.1	aroE_1-gdh_5-gki_4-recP_5-spi_5-xpt_3-ddl_8	15	33125	CC 11
GCA_907169615.1	aroE_1-gdh_5-gki_4-recP_5-spi_5-xpt_3-ddl_8	15	33006	CC 11
GCA_907169625.1	aroE_1-gdh_5-gki_4-recP_5-spi_5-xpt_3-ddl_8	15	33118	CC 11
GCA_907169635.1	aroE_1-gdh_5-gki_4-recP_5-spi_5-xpt_3-ddl_8	15	31997	CC 11
GCA_907169645.1	aroE_1-gdh_5-gki_4-recP_5-spi_5-xpt_3-ddl_8	15	33149	CC 11
GCA_907169665.1	aroE_4-gdh_5-gki_4-recP_5-spi_5-xpt_3-ddl_8	2652	Unknown/Novel	CC 11
GCA_907169675.1	aroE_1-gdh_5-gki_4-recP_5-spi_5-xpt_3-ddl_8	15	33697	CC 11
GCA_907169685.1	aroE_1-gdh_5-gki_4-recP_5-spi_5-xpt_3-ddl_8	15	33237	CC 11
GCA_907169695.1	aroE_1-gdh_5-gki_4-recP_5-spi_5-xpt_3-ddl_8	15	33686	CC 11
GCA_907169715.1	aroE_4-gdh_5-gki_4-recP_5-spi_5-xpt_3-ddl_8	2652	31557	CC 11
GCA_907169725.1	aroE_1-gdh_5-gki_4-recP_5-spi_5-xpt_3-ddl_8	15	33183	CC 11
GCA_907169735.1	aroE_4-gdh_5-gki_4-recP_5-spi_5-xpt_3-ddl_8	2652	Unknown/Novel	CC 11
GCA_907169745.1	aroE_1-gdh_5-gki_4-recP_12-spi_5-xpt_3-ddl_8	423	33990	CC 11
GCA_907169755.1	aroE_4-gdh_5-gki_4-recP_5-spi_5-xpt_3-ddl_8	2652	32071	CC 11
GCA_907169775.1	aroE_1-gdh_5-gki_4-recP_12-spi_5-xpt_3-ddl_8	423	Unknown/Novel	CC 11
GCA_907169795.1	aroE_1-gdh_5-gki_4-recP_5-spi_5-xpt_1-ddl_8	9	34024	CC 11
GCA_907169805.1	aroE_1-gdh_5-gki_4-recP_5-spi_5-xpt_1-ddl_8	9	34020	CC 11
GCA_907169815.1	aroE_1-gdh_5-gki_4-recP_5-spi_5-xpt_1-ddl_8	9	Unknown/Novel	CC 11
GCA_907169825.1	aroE_1-gdh_5-gki_4-recP_5-spi_5-xpt_3-ddl_14	721	Unknown/Novel	CC 11
GCA_907169835.1	aroE_1-gdh_5-gki_4-recP_5-spi_5-xpt_1-ddl_8	9	34031	CC 11
GCA_907169845.1	aroE_1-gdh_5-gki_4-recP_5-spi_5-xpt_1-ddl_8	9	33260	CC 11
GCA_907169865.1	aroE_1-gdh_5-gki_4-recP_5-spi_5-xpt_1-ddl_8	9	34019	CC 11
GCA_907169875.1	aroE_1-gdh_5-gki_4-recP_5-spi_5-xpt_1-ddl_8	9	Unknown/Novel	CC 11
GCA_907169885.1	aroE_1-gdh_5-gki_4-recP_5-spi_5-xpt_1-ddl_8	9	32499	CC 11
GCA_907169895.1	aroE_1-gdh_5-gki_4-recP_5-spi_5-xpt_1-ddl_8	9	33679	CC 11
GCA_907169905.1	aroE_1-gdh_5-gki_4-recP_5-spi_5-xpt_1-ddl_8	9	28920	CC 11
GCA_907169915.1	aroE_1-gdh_5-gki_4-recP_5-spi_5-xpt_27-ddl_8	13	Unknown/Novel	CC 11
GCA_907169925.1	aroE_1-gdh_5-gki_4-recP_5-spi_5-xpt_3-ddl_8	15	Unknown/Novel	CC 11
GCA_907169935.1	aroE_1-gdh_5-gki_4-recP_5-spi_5-xpt_27-ddl_8	13	Unknown/Novel	CC 11
GCA_907169945.1	aroE_1-gdh_5-gki_4-recP_5-spi_5-xpt_3-ddl_8	15	Unknown/Novel	CC 11
GCA_907169955.1	aroE_1-gdh_5-gki_4-recP_5-spi_5-xpt_1-ddl_8	9	Unknown/Novel	CC 11
GCA_907169965.1	aroE_1-gdh_5-gki_4-recP_5-spi_5-xpt_574-ddl_8	9899	35442	CC 11
GCA_907169975.1	aroE_1-gdh_5-gki_4-recP_5-spi_5-xpt_3-ddl_8	15	Unknown/Novel	CC 11
GCA_907169985.1	aroE_1-gdh_5-gki_4-recP_5-spi_5-xpt_27-ddl_8	13	Unknown/Novel	CC 11
GCA_907170025.1	aroE_1-gdh_5-gki_4-recP_5-spi_5-xpt_27-ddl_8	13	Unknown/Novel	CC 11
GCA_907170035.1	aroE_1-gdh_5-gki_4-recP_5-spi_5-xpt_27-ddl_8	13	Unknown/Novel	CC 11
GCA_907170045.1	aroE_1-gdh_5-gki_4-recP_5-spi_5-xpt_27-ddl_8	13	Unknown/Novel	CC 11
GCA_907170055.1	aroE_1-gdh_5-gki_4-recP_5-spi_5-xpt_27-ddl_8	13	Unknown/Novel	CC 11
GCA_907170095.1	aroE_1-gdh_5-gki_4-recP_5-spi_5-xpt_27-ddl_8	13	Unknown/Novel	CC 11
GCA_907170105.1	aroE_1-gdh_5-gki_4-recP_5-spi_5-xpt_27-ddl_8	13	Unknown/Novel	CC 11
GCA_907170135.1	aroE_1-gdh_5-gki_4-recP_5-spi_5-xpt_3-ddl_8	15	Unknown/Novel	CC 11
GCA_907170185.1	aroE_4-gdh_5-gki_4-recP_5-spi_5-xpt_3-ddl_8	2652	Unknown/Novel	CC 11
GCA_907170195.1	aroE_1-gdh_5-gki_4-recP_5-spi_5-xpt_3-ddl_8	15	Unknown/Novel	CC 11
GCA_907170215.1	aroE_1-gdh_5-gki_4-recP_5-spi_5-xpt_3-ddl_8	15	Unknown/Novel	CC 11
GCA_907170225.1	aroE_1-gdh_5-gki_4-recP_5-spi_5-xpt_27-ddl_8	13	Unknown/Novel	CC 11
GCA_907170235.1	aroE_1-gdh_5-gki_4-recP_5-spi_5-xpt_3-ddl_8	15	Unknown/Novel	CC 11
GCA_907170245.1	aroE_1-gdh_5-gki_4-recP_4-spi_5-xpt_3-ddl_8	550	Unknown/Novel	CC 11
GCA_907170265.1	aroE_1-gdh_5-gki_4-recP_5-spi_5-xpt_27-ddl_8	13	Unknown/Novel	CC 11
GCA_907170305.1	aroE_1-gdh_5-gki_4-recP_5-spi_5-xpt_3-ddl_8	15	Unknown/Novel	CC 11
GCA_907170325.1	aroE_1-gdh_5-gki_4-recP_5-spi_5-xpt_3-ddl_8	15	Unknown/Novel	CC 11
GCA_907170345.1	aroE_1-gdh_5-gki_4-recP_4-spi_5-xpt_3-ddl_8	550	Unknown/Novel	CC 11
GCA_907170355.1	aroE_1-gdh_5-gki_4-recP_5-spi_5-xpt_3-ddl_8	15	Unknown/Novel	CC 11
GCA_907170375.1	aroE_1-gdh_5-gki_4-recP_5-spi_5-xpt_3-ddl_8	15	Unknown/Novel	CC 11
GCA_907170395.1	aroE_1-gdh_5-gki_4-recP_4-spi_5-xpt_3-ddl_8	550	Unknown/Novel	CC 11
GCA_907170415.1	aroE_1-gdh_5-gki_4-recP_5-spi_5-xpt_3-ddl_8	15	Unknown/Novel	CC 11
GCA_907170425.1	aroE_1-gdh_5-gki_4-recP_5-spi_5-xpt_3-ddl_8	15	Unknown/Novel	CC 11
GCA_907170435.1	aroE_1-gdh_5-gki_4-recP_5-spi_5-xpt_3-ddl_8	15	Unknown/Novel	CC 11
GCA_907170445.1	aroE_1-gdh_5-gki_4-recP_5-spi_5-xpt_1-ddl_8	9	Unknown/Novel	CC 11
GCA_907170455.1	aroE_1-gdh_5-gki_4-recP_5-spi_5-xpt_1-ddl_8	9	Unknown/Novel	CC 11
GCA_907170465.1	aroE_1-gdh_5-gki_4-recP_5-spi_5-xpt_1-ddl_8	9	Unknown/Novel	CC 11
GCA_907170475.1	aroE_1-gdh_5-gki_4-recP_5-spi_5-xpt_1-ddl_8	9	Unknown/Novel	CC 11
GCA_907170495.1	aroE_1-gdh_5-gki_4-recP_5-spi_5-xpt_1-ddl_8	9	Unknown/Novel	CC 11
GCA_907170505.1	aroE_1-gdh_5-gki_4-recP_5-spi_5-xpt_1-ddl_8	9	Unknown/Novel	CC 11
GCA_907170515.1	aroE_1-gdh_5-gki_4-recP_5-spi_5-xpt_1-ddl_8	9	Unknown/Novel	CC 11
GCA_907170525.1	aroE_1-gdh_5-gki_4-recP_5-spi_5-xpt_1-ddl_8	9	Unknown/Novel	CC 11
GCA_907170535.1	aroE_1-gdh_5-gki_4-recP_5-spi_5-xpt_1-ddl_8	9	Unknown/Novel	CC 11
GCA_907170545.1	aroE_1-gdh_5-gki_4-recP_5-spi_5-xpt_1-ddl_8	9	Unknown/Novel	CC 11
GCA_907170555.1	aroE_1-gdh_5-gki_4-recP_5-spi_5-xpt_1-ddl_8	9	Unknown/Novel	CC 11
GCA_907170565.1	aroE_1-gdh_5-gki_4-recP_5-spi_5-xpt_1-ddl_8	9	Unknown/Novel	CC 11
GCA_907170575.1	aroE_1-gdh_5-gki_4-recP_5-spi_5-xpt_1-ddl_8	9	Unknown/Novel	CC 11
GCA_907170585.1	aroE_1-gdh_5-gki_4-recP_5-spi_5-xpt_1-ddl_8	9	Unknown/Novel	CC 11
GCA_907170595.1	aroE_1-gdh_5-gki_4-recP_5-spi_5-xpt_3-ddl_8	15	Unknown/Novel	CC 11
GCA_907170615.1	aroE_1-gdh_5-gki_4-recP_5-spi_5-xpt_1-ddl_8	9	Unknown/Novel	CC 11
GCA_907170625.1	aroE_1-gdh_5-gki_4-recP_5-spi_5-xpt_1-ddl_8	9	Unknown/Novel	CC 11
GCA_907170635.1	aroE_1-gdh_5-gki_4-recP_5-spi_5-xpt_1-ddl_8	9	Unknown/Novel	CC 11
GCA_907170645.1	aroE_1-gdh_5-gki_4-recP_5-spi_5-xpt_3-ddl_8	15	Unknown/Novel	CC 11
GCA_907170675.1	aroE_1-gdh_5-gki_4-recP_5-spi_5-xpt_1-ddl_8	9	Unknown/Novel	CC 11
GCA_907170685.1	aroE_1-gdh_5-gki_4-recP_5-spi_5-xpt_1-ddl_8	9	Unknown/Novel	CC 11
GCA_907170695.1	aroE_1-gdh_5-gki_4-recP_5-spi_5-xpt_1-ddl_8	9	Unknown/Novel	CC 11
GCA_907170705.1	aroE_1-gdh_5-gki_4-recP_5-spi_5-xpt_3-ddl_8	15	Unknown/Novel	CC 11
GCA_907170715.1	aroE_1-gdh_5-gki_4-recP_12-spi_5-xpt_3-ddl_8	423	Unknown/Novel	CC 11
GCA_907170725.1	aroE_1-gdh_5-gki_4-recP_12-spi_5-xpt_3-ddl_8	423	Unknown/Novel	CC 11
GCA_907170735.1	aroE_1-gdh_5-gki_4-recP_5-spi_5-xpt_1-ddl_8	9	Unknown/Novel	CC 11
GCA_907170745.1	aroE_1-gdh_5-gki_4-recP_5-spi_5-xpt_1-ddl_8	9	Unknown/Novel	CC 11
GCA_907170755.1	aroE_1-gdh_5-gki_4-recP_5-spi_5-xpt_1-ddl_8	9	Unknown/Novel	CC 11
GCA_907170765.1	aroE_1-gdh_5-gki_4-recP_5-spi_5-xpt_3-ddl_8	15	Unknown/Novel	CC 11
GCA_907170775.1	aroE_1-gdh_5-gki_4-recP_5-spi_5-xpt_1-ddl_8	9	Unknown/Novel	CC 11
GCA_907170785.1	aroE_1-gdh_5-gki_4-recP_5-spi_5-xpt_3-ddl_8	15	Unknown/Novel	CC 11
GCA_907170795.1	aroE_1-gdh_5-gki_4-recP_5-spi_5-xpt_1-ddl_8	9	Unknown/Novel	CC 11
GCA_907170805.1	aroE_1-gdh_5-gki_4-recP_5-spi_5-xpt_1-ddl_8	9	Unknown/Novel	CC 11
GCA_907170815.1	aroE_1-gdh_5-gki_4-recP_5-spi_5-xpt_1-ddl_8	9	Unknown/Novel	CC 11
GCA_907170825.1	aroE_1-gdh_5-gki_4-recP_5-spi_5-xpt_1-ddl_8	9	Unknown/Novel	CC 11
GCA_907170835.1	aroE_1-gdh_5-gki_4-recP_5-spi_5-xpt_3-ddl_8	15	Unknown/Novel	CC 11
GCA_907170845.1	aroE_1-gdh_5-gki_4-recP_5-spi_5-xpt_1-ddl_8	9	Unknown/Novel	CC 11
GCA_907170865.1	aroE_1-gdh_5-gki_4-recP_5-spi_5-xpt_3-ddl_8	15	Unknown/Novel	CC 11
GCA_907170875.1	aroE_1-gdh_5-gki_4-recP_5-spi_5-xpt_1-ddl_8	9	Unknown/Novel	CC 11
GCA_907170885.1	aroE_1-gdh_5-gki_4-recP_5-spi_5-xpt_1-ddl_8	9	Unknown/Novel	CC 11
GCA_907170895.1	aroE_1-gdh_5-gki_4-recP_5-spi_5-xpt_1-ddl_8	9	Unknown/Novel	CC 11
GCA_907170905.1	aroE_1-gdh_5-gki_4-recP_5-spi_5-xpt_1-ddl_8	9	Unknown/Novel	CC 11
GCA_907170915.1	aroE_1-gdh_5-gki_4-recP_5-spi_5-xpt_3-ddl_8	15	Unknown/Novel	CC 11
GCA_907170925.1	aroE_1-gdh_5-gki_4-recP_5-spi_5-xpt_1-ddl_8	9	Unknown/Novel	CC 11
GCA_907170935.1	aroE_1-gdh_5-gki_4-recP_5-spi_5-xpt_1-ddl_8	9	Unknown/Novel	CC 11
GCA_907170945.1	aroE_1-gdh_5-gki_4-recP_5-spi_5-xpt_1-ddl_8	9	Unknown/Novel	CC 11
GCA_907170955.1	aroE_1-gdh_5-gki_4-recP_5-spi_5-xpt_1-ddl_8	9	Unknown/Novel	CC 11
GCA_907170965.1	aroE_1-gdh_5-gki_4-recP_5-spi_5-xpt_1-ddl_8	9	Unknown/Novel	CC 11
GCA_907170975.1	aroE_1-gdh_5-gki_4-recP_5-spi_5-xpt_1-ddl_8	9	Unknown/Novel	CC 11
GCA_907170985.1	aroE_1-gdh_5-gki_4-recP_5-spi_5-xpt_1-ddl_8	9	Unknown/Novel	CC 11
GCA_907170995.1	aroE_1-gdh_5-gki_4-recP_5-spi_5-xpt_1-ddl_8	9	Unknown/Novel	CC 11
GCA_907171005.1	aroE_1-gdh_5-gki_4-recP_5-spi_5-xpt_3-ddl_8	15	Unknown/Novel	CC 11
GCA_907171015.1	aroE_1-gdh_5-gki_4-recP_5-spi_5-xpt_3-ddl_8	15	Unknown/Novel	CC 11
GCA_907171025.1	aroE_1-gdh_5-gki_4-recP_5-spi_5-xpt_1-ddl_8	9	Unknown/Novel	CC 11
GCA_907171035.1	aroE_1-gdh_5-gki_4-recP_5-spi_5-xpt_1-ddl_8	9	Unknown/Novel	CC 11
GCA_907171045.1	aroE_1-gdh_5-gki_4-recP_5-spi_5-xpt_1-ddl_8	9	Unknown/Novel	CC 11
GCA_907171055.1	aroE_1-gdh_5-gki_4-recP_5-spi_5-xpt_1-ddl_8	9	Unknown/Novel	CC 11
GCA_907171065.1	aroE_1-gdh_5-gki_4-recP_5-spi_5-xpt_1-ddl_8	9	Unknown/Novel	CC 11
GCA_907171075.1	aroE_1-gdh_5-gki_4-recP_5-spi_5-xpt_1-ddl_8	9	Unknown/Novel	CC 11
GCA_907171085.1	aroE_1-gdh_5-gki_4-recP_5-spi_5-xpt_1-ddl_8	9	Unknown/Novel	CC 11
GCA_907171095.1	aroE_1-gdh_5-gki_4-recP_5-spi_5-xpt_1-ddl_8	9	Unknown/Novel	CC 11
GCA_907171105.1	aroE_1-gdh_5-gki_4-recP_5-spi_5-xpt_1-ddl_8	9	Unknown/Novel	CC 11
GCA_907171115.1	aroE_1-gdh_5-gki_4-recP_5-spi_5-xpt_1-ddl_8	9	Unknown/Novel	CC 11
GCA_907171125.1	aroE_1-gdh_5-gki_4-recP_5-spi_5-xpt_1-ddl_8	9	Unknown/Novel	CC 11
GCA_907171135.1	aroE_1-gdh_5-gki_4-recP_5-spi_5-xpt_1-ddl_8	9	Unknown/Novel	CC 11
GCA_907171155.1	aroE_1-gdh_5-gki_4-recP_5-spi_5-xpt_1-ddl_8	9	Unknown/Novel	CC 11
GCA_907171165.1	aroE_1-gdh_5-gki_4-recP_5-spi_5-xpt_3-ddl_8	15	Unknown/Novel	CC 11
GCA_907171175.1	aroE_1-gdh_5-gki_4-recP_5-spi_5-xpt_3-ddl_8	15	Unknown/Novel	CC 11
GCA_907171185.1	aroE_1-gdh_5-gki_4-recP_5-spi_5-xpt_1-ddl_8	9	Unknown/Novel	CC 11
GCA_907171195.1	aroE_1-gdh_5-gki_4-recP_5-spi_5-xpt_3-ddl_8	15	Unknown/Novel	CC 11
GCA_907171205.1	aroE_1-gdh_5-gki_4-recP_5-spi_5-xpt_3-ddl_8	15	Unknown/Novel	CC 11
GCA_907171215.1	aroE_1-gdh_5-gki_4-recP_5-spi_5-xpt_1-ddl_8	9	Unknown/Novel	CC 11
GCA_907171225.1	aroE_1-gdh_5-gki_4-recP_5-spi_5-xpt_1-ddl_8	9	Unknown/Novel	CC 11
GCA_907171235.1	aroE_1-gdh_5-gki_4-recP_5-spi_5-xpt_3-ddl_8	15	Unknown/Novel	CC 11
GCA_907171245.1	aroE_1-gdh_5-gki_4-recP_5-spi_5-xpt_1-ddl_8	9	Unknown/Novel	CC 11
GCA_907171265.1	aroE_1-gdh_5-gki_4-recP_5-spi_5-xpt_1-ddl_8	9	Unknown/Novel	CC 11
GCA_907171275.1	aroE_1-gdh_5-gki_4-recP_5-spi_5-xpt_3-ddl_8	15	Unknown/Novel	CC 11
GCA_907171285.1	aroE_1-gdh_5-gki_4-recP_5-spi_5-xpt_3-ddl_8	15	Unknown/Novel	CC 11
GCA_907171295.1	aroE_1-gdh_5-gki_4-recP_5-spi_5-xpt_1-ddl_8	9	Unknown/Novel	CC 11
GCA_907171305.1	aroE_1-gdh_5-gki_4-recP_5-spi_5-xpt_1-ddl_8	9	Unknown/Novel	CC 11
GCA_907171315.1	aroE_1-gdh_5-gki_4-recP_5-spi_5-xpt_3-ddl_8	15	Unknown/Novel	CC 11
GCA_907171325.1	aroE_1-gdh_5-gki_4-recP_5-spi_5-xpt_1-ddl_8	9	Unknown/Novel	CC 11
GCA_907171335.1	aroE_1-gdh_5-gki_4-recP_5-spi_5-xpt_1-ddl_8	9	Unknown/Novel	CC 11
GCA_907171355.1	aroE_1-gdh_5-gki_4-recP_5-spi_5-xpt_1-ddl_8	9	Unknown/Novel	CC 11
GCA_907171365.1	aroE_1-gdh_5-gki_4-recP_5-spi_5-xpt_1-ddl_8	9	Unknown/Novel	CC 11
GCA_907171375.1	aroE_1-gdh_5-gki_4-recP_5-spi_5-xpt_1-ddl_8	9	Unknown/Novel	CC 11
GCA_907171385.1	aroE_1-gdh_5-gki_4-recP_5-spi_5-xpt_3-ddl_8	15	Unknown/Novel	CC 11
GCA_907171395.1	aroE_1-gdh_5-gki_4-recP_5-spi_5-xpt_3-ddl_8	15	Unknown/Novel	CC 11
GCA_907171415.1	aroE_1-gdh_5-gki_4-recP_5-spi_5-xpt_1-ddl_8	9	Unknown/Novel	CC 11
GCA_907171425.1	aroE_1-gdh_5-gki_4-recP_5-spi_5-xpt_3-ddl_8	15	Unknown/Novel	CC 11
GCA_907171435.1	aroE_1-gdh_5-gki_4-recP_5-spi_5-xpt_1-ddl_8	9	Unknown/Novel	CC 11
GCA_907171445.1	aroE_1-gdh_5-gki_4-recP_5-spi_5-xpt_3-ddl_8	15	Unknown/Novel	CC 11
GCA_907171455.1	aroE_1-gdh_5-gki_4-recP_5-spi_5-xpt_1-ddl_8	9	Unknown/Novel	CC 11
GCA_907171465.1	aroE_1-gdh_5-gki_4-recP_5-spi_5-xpt_1-ddl_8	9	Unknown/Novel	CC 11
GCA_907171475.1	aroE_1-gdh_5-gki_4-recP_5-spi_5-xpt_1-ddl_8	9	Unknown/Novel	CC 11
GCA_907171485.1	aroE_1-gdh_5-gki_4-recP_5-spi_5-xpt_1-ddl_8	9	Unknown/Novel	CC 11
GCA_907171495.1	aroE_1-gdh_5-gki_4-recP_5-spi_5-xpt_1-ddl_8	9	Unknown/Novel	CC 11
GCA_907171505.1	aroE_1-gdh_5-gki_4-recP_5-spi_5-xpt_1-ddl_8	9	Unknown/Novel	CC 11
GCA_907171515.1	aroE_1-gdh_5-gki_4-recP_5-spi_5-xpt_1-ddl_8	9	Unknown/Novel	CC 11
GCA_907171545.1	aroE_1-gdh_5-gki_4-recP_5-spi_5-xpt_3-ddl_8	15	Unknown/Novel	CC 11
GCA_907171555.1	aroE_1-gdh_5-gki_4-recP_5-spi_5-xpt_1-ddl_8	9	Unknown/Novel	CC 11
GCA_907171565.1	aroE_1-gdh_5-gki_4-recP_5-spi_5-xpt_1-ddl_8	9	Unknown/Novel	CC 11
GCA_907171575.1	aroE_1-gdh_5-gki_4-recP_5-spi_5-xpt_3-ddl_8	15	Unknown/Novel	CC 11
GCA_907171585.1	aroE_1-gdh_5-gki_4-recP_5-spi_5-xpt_1-ddl_8	9	Unknown/Novel	CC 11
GCA_907171595.1	aroE_1-gdh_5-gki_4-recP_5-spi_5-xpt_1-ddl_24	24	Unknown/Novel	CC 11
GCA_907171605.1	aroE_1-gdh_5-gki_4-recP_5-spi_5-xpt_1-ddl_8	9	Unknown/Novel	CC 11
GCA_907171615.1	aroE_1-gdh_5-gki_4-recP_5-spi_5-xpt_1-ddl_8	9	Unknown/Novel	CC 11
GCA_907171625.1	aroE_1-gdh_5-gki_4-recP_5-spi_5-xpt_1-ddl_8	9	Unknown/Novel	CC 11
GCA_907171635.1	aroE_1-gdh_5-gki_4-recP_5-spi_5-xpt_1-ddl_8	9	Unknown/Novel	CC 11
GCA_907171645.1	aroE_1-gdh_5-gki_4-recP_5-spi_5-xpt_1-ddl_8	9	Unknown/Novel	CC 11
GCA_907171655.1	aroE_1-gdh_5-gki_4-recP_5-spi_5-xpt_1-ddl_8	9	Unknown/Novel	CC 11
GCA_907171675.1	aroE_1-gdh_5-gki_4-recP_5-spi_5-xpt_3-ddl_8	15	Unknown/Novel	CC 11
GCA_907171685.1	aroE_1-gdh_5-gki_4-recP_5-spi_5-xpt_1-ddl_8	9	Unknown/Novel	CC 11
GCA_907171725.1	aroE_1-gdh_5-gki_4-recP_12-spi_5-xpt_3-ddl_159	1815	Unknown/Novel	CC 11
GCA_907171735.1	aroE_1-gdh_5-gki_4-recP_5-spi_5-xpt_1-ddl_8	9	Unknown/Novel	CC 11
GCA_907171765.1	aroE_1-gdh_5-gki_4-recP_5-spi_5-xpt_1-ddl_8	9	Unknown/Novel	CC 11
GCA_907171775.1	aroE_1-gdh_5-gki_4-recP_5-spi_5-xpt_1-ddl_8	9	Unknown/Novel	CC 11
GCA_907171785.1	aroE_1-gdh_5-gki_4-recP_5-spi_5-xpt_1-ddl_8	9	Unknown/Novel	CC 11
GCA_907171795.1	aroE_1-gdh_5-gki_4-recP_5-spi_5-xpt_1-ddl_8	9	Unknown/Novel	CC 11
GCA_907171805.1	aroE_1-gdh_5-gki_4-recP_5-spi_5-xpt_1-ddl_8	9	Unknown/Novel	CC 11
GCA_907171815.1	aroE_1-gdh_5-gki_4-recP_5-spi_5-xpt_1-ddl_8	9	Unknown/Novel	CC 11
GCA_907171825.1	aroE_1-gdh_5-gki_4-recP_5-spi_5-xpt_1-ddl_8	9	Unknown/Novel	CC 11
GCA_907171835.1	aroE_1-gdh_5-gki_4-recP_5-spi_5-xpt_1-ddl_8	9	Unknown/Novel	CC 11
GCA_907171845.1	aroE_1-gdh_5-gki_4-recP_5-spi_5-xpt_1-ddl_8	9	Unknown/Novel	CC 11
GCA_907171855.1	aroE_1-gdh_5-gki_4-recP_5-spi_5-xpt_1-ddl_8	9	Unknown/Novel	CC 11
GCA_907171865.1	aroE_1-gdh_5-gki_4-recP_5-spi_5-xpt_1-ddl_8	9	Unknown/Novel	CC 11
GCA_907171895.1	aroE_1-gdh_5-gki_4-recP_5-spi_5-xpt_1-ddl_8	9	Unknown/Novel	CC 11
GCA_907171905.1	aroE_1-gdh_5-gki_4-recP_5-spi_5-xpt_1-ddl_8	9	Unknown/Novel	CC 11
GCA_907171915.1	aroE_1-gdh_5-gki_4-recP_5-spi_5-xpt_1-ddl_8	9	Unknown/Novel	CC 11
GCA_907171935.1	aroE_1-gdh_5-gki_4-recP_5-spi_5-xpt_3-ddl_8	15	Unknown/Novel	CC 11
GCA_907171945.1	aroE_1-gdh_5-gki_4-recP_5-spi_5-xpt_1-ddl_8	9	Unknown/Novel	CC 11
GCA_907171955.1	aroE_1-gdh_5-gki_4-recP_5-spi_5-xpt_1-ddl_8	9	Unknown/Novel	CC 11
GCA_907171965.1	aroE_1-gdh_5-gki_4-recP_5-spi_5-xpt_1-ddl_8	9	Unknown/Novel	CC 11
GCA_907171975.1	aroE_1-gdh_5-gki_4-recP_5-spi_5-xpt_1-ddl_8	9	Unknown/Novel	CC 11
GCA_907171985.1	aroE_1-gdh_5-gki_4-recP_5-spi_5-xpt_1-ddl_8	9	Unknown/Novel	CC 11
GCA_907171995.1	aroE_1-gdh_5-gki_4-recP_5-spi_5-xpt_1-ddl_8	9	Unknown/Novel	CC 11
GCA_907172005.1	aroE_1-gdh_5-gki_4-recP_5-spi_5-xpt_1-ddl_8	9	Unknown/Novel	CC 11
GCA_907172015.1	aroE_1-gdh_5-gki_4-recP_5-spi_5-xpt_1-ddl_8	9	Unknown/Novel	CC 11
GCA_907172025.1	aroE_1-gdh_5-gki_4-recP_5-spi_5-xpt_1-ddl_8	9	Unknown/Novel	CC 11
GCA_907172035.1	aroE_1-gdh_5-gki_4-recP_5-spi_5-xpt_1-ddl_8	9	Unknown/Novel	CC 11
GCA_907172045.1	aroE_1-gdh_5-gki_4-recP_5-spi_5-xpt_1-ddl_8	9	Unknown/Novel	CC 11
GCA_907172055.1	aroE_1-gdh_5-gki_4-recP_5-spi_5-xpt_1-ddl_8	9	Unknown/Novel	CC 11
GCA_907172065.1	aroE_1-gdh_5-gki_4-recP_5-spi_5-xpt_1-ddl_8	9	Unknown/Novel	CC 11
GCA_907172075.1	aroE_1-gdh_5-gki_4-recP_5-spi_5-xpt_1-ddl_8	9	Unknown/Novel	CC 11
GCA_907172085.1	aroE_1-gdh_5-gki_4-recP_5-spi_5-xpt_1-ddl_8	9	Unknown/Novel	CC 11
GCA_907172095.1	aroE_1-gdh_5-gki_4-recP_5-spi_5-xpt_1-ddl_8	9	Unknown/Novel	CC 11
GCA_907172105.1	aroE_1-gdh_5-gki_4-recP_5-spi_5-xpt_1-ddl_8	9	Unknown/Novel	CC 11
GCA_907172145.1	aroE_1-gdh_5-gki_4-recP_5-spi_5-xpt_1-ddl_8	9	Unknown/Novel	CC 11
GCA_907172165.1	aroE_1-gdh_5-gki_4-recP_5-spi_5-xpt_1-ddl_8	9	Unknown/Novel	CC 11
GCA_907172175.1	aroE_1-gdh_5-gki_4-recP_5-spi_5-xpt_1-ddl_8	9	Unknown/Novel	CC 11
GCA_907172185.1	aroE_1-gdh_38-gki_4-recP_5-spi_5-xpt_3-ddl_5	10705	Unknown/Novel	CC 11
GCA_907172195.1	aroE_1-gdh_5-gki_4-recP_1-spi_6-xpt_3-ddl_8	13332	35342	CC 11
GCA_907172205.1	aroE_1-gdh_5-gki_4-recP_5-spi_5-xpt_744-ddl_8	12851	35439	CC 11
GCA_907172225.1	aroE_4-gdh_5-gki_4-recP_5-spi_5-xpt_3-ddl_6	12242	32092	CC 11
GCA_907172235.1	aroE_1-gdh_5-gki_4-recP_5-spi_5-xpt_3-ddl_8	15	Unknown/Novel	CC 11
GCA_907172255.1	aroE_1-gdh_5-gki_1-recP_12-spi_5-xpt_3-ddl_8	1006	Unknown/Novel	CC 11
GCA_907172285.1	aroE_1-gdh_5-gki_4-recP_5-spi_5-xpt_78-ddl_8	622	35428	CC 11
GCA_907172335.1	aroE_1-gdh_5-gki_1-recP_12-spi_17-xpt_3-ddl_8	1201	33738	CC 11
GCA_907172345.1	aroE_1-gdh_5-gki_1-recP_12-spi_17-xpt_3-ddl_8	1201	33955	CC 11
GCA_907172355.1	aroE_1-gdh_5-gki_1-recP_12-spi_17-xpt_3-ddl_8	1201	34059	CC 11
GCA_907172365.1	aroE_1-gdh_5-gki_1-recP_12-spi_17-xpt_3-ddl_8	1201	34040	CC 11
GCA_909594485.1	aroE_1-gdh_5-gki_4-recP_12-spi_5-xpt_3-ddl_8	423	Unknown/Novel	CC 11
GCA_909594495.1	aroE_1-gdh_5-gki_4-recP_5-spi_5-xpt_1-ddl_8	9	Unknown/Novel	CC 11
GCA_909594505.1	aroE_1-gdh_5-gki_4-recP_5-spi_5-xpt_1-ddl_8	9	Unknown/Novel	CC 11
GCA_909594515.1	aroE_1-gdh_5-gki_4-recP_5-spi_5-xpt_1-ddl_8	9	Unknown/Novel	CC 11
GCA_909594525.1	aroE_1-gdh_5-gki_4-recP_5-spi_5-xpt_1-ddl_8	9	Unknown/Novel	CC 11
GCA_909594535.1	aroE_1-gdh_5-gki_4-recP_5-spi_5-xpt_1-ddl_8	9	Unknown/Novel	CC 11
GCA_909594545.1	aroE_1-gdh_5-gki_4-recP_5-spi_5-xpt_1-ddl_8	9	Unknown/Novel	CC 11
GCA_909594555.1	aroE_1-gdh_5-gki_4-recP_5-spi_5-xpt_1-ddl_8	9	Unknown/Novel	CC 11
GCA_909594565.1	aroE_1-gdh_5-gki_4-recP_5-spi_5-xpt_1-ddl_8	9	Unknown/Novel	CC 11
GCA_909594575.1	aroE_1-gdh_5-gki_4-recP_5-spi_5-xpt_1-ddl_8	9	Unknown/Novel	CC 11
GCA_909594585.1	aroE_1-gdh_5-gki_4-recP_5-spi_5-xpt_1-ddl_8	9	Unknown/Novel	CC 11
GCA_909594595.1	aroE_1-gdh_5-gki_4-recP_5-spi_5-xpt_1-ddl_8	9	Unknown/Novel	CC 11
GCA_909594605.1	aroE_1-gdh_5-gki_4-recP_5-spi_5-xpt_1-ddl_8	9	Unknown/Novel	CC 11
GCA_909594615.1	aroE_1-gdh_5-gki_4-recP_5-spi_5-xpt_1-ddl_8	9	Unknown/Novel	CC 11
GCA_909594625.1	aroE_1-gdh_5-gki_4-recP_5-spi_5-xpt_1-ddl_8	9	Unknown/Novel	CC 11
GCA_909594635.1	aroE_1-gdh_5-gki_4-recP_5-spi_5-xpt_1-ddl_8	9	Unknown/Novel	CC 11
GCA_909594645.1	aroE_1-gdh_5-gki_4-recP_5-spi_5-xpt_1-ddl_8	9	Unknown/Novel	CC 11
GCA_909594655.1	aroE_1-gdh_5-gki_4-recP_5-spi_5-xpt_1-ddl_8	9	Unknown/Novel	CC 11
GCA_909594665.1	aroE_1-gdh_5-gki_4-recP_5-spi_5-xpt_1-ddl_8	9	Unknown/Novel	CC 11
GCA_909594675.1	aroE_1-gdh_5-gki_4-recP_5-spi_5-xpt_1-ddl_8	9	Unknown/Novel	CC 11
GCA_909594685.1	aroE_1-gdh_5-gki_4-recP_5-spi_5-xpt_1-ddl_8	9	Unknown/Novel	CC 11
GCA_909594695.1	aroE_1-gdh_5-gki_4-recP_5-spi_5-xpt_1-ddl_8	9	Unknown/Novel	CC 11
GCA_909594705.1	aroE_1-gdh_5-gki_4-recP_5-spi_5-xpt_1-ddl_8	9	Unknown/Novel	CC 11
GCA_909594715.1	aroE_1-gdh_5-gki_4-recP_5-spi_5-xpt_1-ddl_8	9	Unknown/Novel	CC 11
GCA_909594725.1	aroE_1-gdh_5-gki_4-recP_5-spi_5-xpt_1-ddl_8	9	Unknown/Novel	CC 11
GCA_909594735.1	aroE_1-gdh_5-gki_4-recP_5-spi_5-xpt_1-ddl_8	9	Unknown/Novel	CC 11
GCA_909594745.1	aroE_1-gdh_5-gki_4-recP_5-spi_5-xpt_1-ddl_8	9	Unknown/Novel	CC 11
GCA_909594755.1	aroE_1-gdh_5-gki_4-recP_5-spi_5-xpt_1-ddl_8	9	Unknown/Novel	CC 11
GCA_909594775.1	aroE_1-gdh_5-gki_4-recP_5-spi_5-xpt_1-ddl_8	9	Unknown/Novel	CC 11
GCA_909594805.1	aroE_1-gdh_5-gki_4-recP_12-spi_5-xpt_3-ddl_8	423	Unknown/Novel	CC 11
GCA_909594815.1	aroE_1-gdh_5-gki_4-recP_5-spi_5-xpt_1-ddl_8	9	Unknown/Novel	CC 11
GCA_909594835.1	aroE_1-gdh_5-gki_4-recP_5-spi_5-xpt_1-ddl_8	9	Unknown/Novel	CC 11
GCA_909594855.1	aroE_1-gdh_5-gki_4-recP_5-spi_5-xpt_1-ddl_8	9	Unknown/Novel	CC 11
GCA_909594865.1	aroE_1-gdh_5-gki_4-recP_5-spi_5-xpt_1-ddl_8	9	Unknown/Novel	CC 11
GCA_909594875.1	aroE_1-gdh_5-gki_4-recP_5-spi_5-xpt_1-ddl_8	9	Unknown/Novel	CC 11
GCA_000279775.1	aroE_1-gdh_5-gki_4-recP_15-spi_5-xpt_27-ddl_8	novel-1	Unknown/Novel	CC 11
GCA_907170405.1	aroE_1-gdh_5-gki_4-recP_5-spi_5-xpt_322-ddl_8	novel-18	Unknown/Novel	CC 11
GCA_001110165.2	aroE_1-gdh_5-gki_27-recP_5-spi_1-xpt_1-ddl_76	570	Unknown/Novel	CC 48
GCA_900017295.1	aroE_1-gdh_5-gki_27-recP_20-spi_1-xpt_1-ddl_1	30	Unknown/Novel	CC 48
GCA_900019455.1	aroE_1-gdh_5-gki_27-recP_20-spi_1-xpt_1-ddl_1	30	17443	CC 48
GCA_900021305.1	aroE_1-gdh_5-gki_27-recP_20-spi_1-xpt_1-ddl_1	30	17214	CC 48
GCA_900022965.1	aroE_1-gdh_5-gki_27-recP_20-spi_1-xpt_1-ddl_1	30	Unknown/Novel	CC 48
GCA_900023605.1	aroE_1-gdh_5-gki_27-recP_20-spi_1-xpt_4-ddl_1	5136	17479	CC 48
GCA_900023695.1	aroE_1-gdh_5-gki_27-recP_20-spi_1-xpt_1-ddl_1	30	17133	CC 48
GCA_900024065.1	aroE_1-gdh_5-gki_27-recP_20-spi_1-xpt_4-ddl_1	5136	Unknown/Novel	CC 48
GCA_900024115.1	aroE_1-gdh_5-gki_27-recP_20-spi_1-xpt_1-ddl_1	30	Unknown/Novel	CC 48
GCA_900026695.1	aroE_1-gdh_5-gki_27-recP_20-spi_1-xpt_1-ddl_1	30	Unknown/Novel	CC 48
GCA_900027715.1	aroE_1-gdh_5-gki_27-recP_20-spi_1-xpt_1-ddl_1	30	Unknown/Novel	CC 48
GCA_900027785.1	aroE_1-gdh_5-gki_27-recP_20-spi_1-xpt_1-ddl_1	30	29650	CC 48
GCA_900029995.1	aroE_1-gdh_5-gki_27-recP_20-spi_1-xpt_1-ddl_1	30	Unknown/Novel	CC 48
GCA_900030515.1	aroE_1-gdh_5-gki_27-recP_20-spi_1-xpt_1-ddl_1	30	29620	CC 48
GCA_900030765.1	aroE_1-gdh_5-gki_27-recP_5-spi_1-xpt_1-ddl_1	414	Unknown/Novel	CC 48
GCA_900030795.1	aroE_1-gdh_5-gki_27-recP_20-spi_1-xpt_4-ddl_1	5136	29180	CC 48
GCA_900031325.1	aroE_1-gdh_5-gki_27-recP_20-spi_1-xpt_4-ddl_1	5136	Unknown/Novel	CC 48
GCA_900032275.1	aroE_1-gdh_5-gki_27-recP_20-spi_1-xpt_1-ddl_1	30	Unknown/Novel	CC 48
GCA_900033485.1	aroE_1-gdh_5-gki_27-recP_20-spi_1-xpt_1-ddl_1	30	17133	CC 48
GCA_900036175.1	aroE_1-gdh_5-gki_27-recP_20-spi_1-xpt_1-ddl_1	30	Unknown/Novel	CC 48
GCA_900042845.1	aroE_1-gdh_5-gki_27-recP_5-spi_1-xpt_1-ddl_1	414	Unknown/Novel	CC 48
GCA_900189695.1	aroE_1-gdh_5-gki_27-recP_20-spi_1-xpt_1-ddl_1	30	Unknown/Novel	CC 48
GCA_900189745.1	aroE_1-gdh_5-gki_27-recP_20-spi_1-xpt_1-ddl_1	30	Unknown/Novel	CC 48
GCA_900190565.1	aroE_1-gdh_5-gki_27-recP_20-spi_1-xpt_1-ddl_1	30	Unknown/Novel	CC 48
GCA_900191975.1	aroE_1-gdh_5-gki_27-recP_5-spi_1-xpt_1-ddl_1	414	Unknown/Novel	CC 48
GCA_900192205.1	aroE_1-gdh_5-gki_27-recP_20-spi_1-xpt_1-ddl_1	30	Unknown/Novel	CC 48
GCA_900193035.1	aroE_1-gdh_5-gki_27-recP_20-spi_1-xpt_1-ddl_1	30	Unknown/Novel	CC 48
GCA_900193045.1	aroE_1-gdh_5-gki_27-recP_5-spi_1-xpt_1-ddl_1	414	Unknown/Novel	CC 48
GCA_900193495.1	aroE_1-gdh_5-gki_27-recP_5-spi_1-xpt_1-ddl_1	414	Unknown/Novel	CC 48
GCA_900193805.1	aroE_1-gdh_5-gki_27-recP_20-spi_1-xpt_1-ddl_1	30	8920	CC 48
GCA_900194575.1	aroE_1-gdh_5-gki_27-recP_20-spi_1-xpt_1-ddl_1	30	Unknown/Novel	CC 48
GCA_900194625.1	aroE_1-gdh_5-gki_27-recP_20-spi_1-xpt_1-ddl_1	30	8999	CC 48
GCA_900194775.1	aroE_1-gdh_5-gki_27-recP_5-spi_1-xpt_1-ddl_1	414	Unknown/Novel	CC 48
GCA_901220025.1	aroE_1-gdh_5-gki_27-recP_16-spi_1-xpt_3-ddl_14	11120	18874	CC 48
GCA_901233315.1	aroE_1-gdh_5-gki_27-recP_20-spi_1-xpt_1-ddl_1	30	18579	CC 48
GCA_901237705.1	aroE_1-gdh_5-gki_27-recP_16-spi_1-xpt_3-ddl_1	11054	18210	CC 48
GCA_901241605.1	aroE_1-gdh_5-gki_27-recP_20-spi_1-xpt_3-ddl_1	10584	16051	CC 48
GCA_901243955.1	aroE_1-gdh_5-gki_27-recP_20-spi_1-xpt_3-ddl_1	10584	17669	CC 48
GCA_901250945.1	aroE_1-gdh_5-gki_27-recP_20-spi_1-xpt_3-ddl_1	10584	Unknown/Novel	CC 48
GCA_901252275.1	aroE_1-gdh_5-gki_27-recP_20-spi_1-xpt_1-ddl_1	30	16860	CC 48
GCA_901257535.1	aroE_1-gdh_5-gki_27-recP_5-spi_1-xpt_1-ddl_76	570	Unknown/Novel	CC 48
GCA_901258625.1	aroE_1-gdh_5-gki_27-recP_20-spi_1-xpt_3-ddl_1	10584	Unknown/Novel	CC 48
GCA_901283095.1	aroE_1-gdh_5-gki_15-recP_20-spi_1-xpt_1-ddl_1	10733	Unknown/Novel	CC 48
GCA_901283515.1	aroE_1-gdh_5-gki_27-recP_5-spi_1-xpt_1-ddl_76	570	21101	CC 48
GCA_901286755.1	aroE_1-gdh_5-gki_27-recP_20-spi_1-xpt_1-ddl_1	30	28907	CC 48
GCA_901288755.1	aroE_1-gdh_5-gki_27-recP_20-spi_1-xpt_1-ddl_1	30	28906	CC 48
GCA_901297265.1	aroE_1-gdh_5-gki_27-recP_20-spi_6-xpt_1-ddl_1	1500	28910	CC 48
GCA_901300605.1	aroE_1-gdh_5-gki_27-recP_20-spi_6-xpt_596-ddl_1	12464	28911	CC 48
GCA_901302815.1	aroE_1-gdh_5-gki_27-recP_20-spi_6-xpt_1-ddl_1	1500	28908	CC 48
GCA_901310935.1	aroE_1-gdh_5-gki_27-recP_5-spi_1-xpt_1-ddl_76	570	Unknown/Novel	CC 48
GCA_901330905.1	aroE_1-gdh_62-gki_27-recP_16-spi_1-xpt_3-ddl_1	11079	18469	CC 48
GCA_901340925.1	aroE_1-gdh_5-gki_27-recP_20-spi_6-xpt_1-ddl_1	1500	28909	CC 48
GCA_019457155.1	aroE_2-gdh_5-gki_1-recP_11-spi_16-xpt_3-ddl_14	53	Unknown/Novel	CC 43
GCA_900016995.1	aroE_2-gdh_5-gki_1-recP_11-spi_16-xpt_3-ddl_14	53	17049	CC 43
GCA_900017185.1	aroE_2-gdh_5-gki_1-recP_11-spi_16-xpt_3-ddl_14	53	29589	CC 43
GCA_900017375.1	aroE_2-gdh_5-gki_1-recP_11-spi_16-xpt_3-ddl_14	53	16985	CC 43
GCA_900017385.1	aroE_2-gdh_5-gki_1-recP_11-spi_16-xpt_3-ddl_14	53	17057	CC 43
GCA_900017855.1	aroE_2-gdh_5-gki_1-recP_11-spi_16-xpt_3-ddl_14	53	Unknown/Novel	CC 43
GCA_900017865.1	aroE_2-gdh_5-gki_1-recP_11-spi_16-xpt_3-ddl_14	53	Unknown/Novel	CC 43
GCA_900018995.1	aroE_2-gdh_5-gki_1-recP_11-spi_16-xpt_3-ddl_14	53	Unknown/Novel	CC 43
GCA_900019695.1	aroE_2-gdh_5-gki_1-recP_11-spi_16-xpt_3-ddl_14	53	Unknown/Novel	CC 43
GCA_900019765.1	aroE_2-gdh_5-gki_1-recP_11-spi_16-xpt_3-ddl_14	53	17519	CC 43
GCA_900019825.1	aroE_2-gdh_5-gki_1-recP_11-spi_16-xpt_3-ddl_14	53	17333	CC 43
GCA_900019835.1	aroE_2-gdh_5-gki_1-recP_11-spi_16-xpt_3-ddl_14	53	17336	CC 43
GCA_900019865.1	aroE_2-gdh_5-gki_1-recP_11-spi_16-xpt_3-ddl_14	53	Unknown/Novel	CC 43
GCA_900020565.1	aroE_2-gdh_5-gki_1-recP_11-spi_16-xpt_3-ddl_14	53	Unknown/Novel	CC 43
GCA_900020685.1	aroE_2-gdh_5-gki_1-recP_11-spi_16-xpt_3-ddl_14	53	17414	CC 43
GCA_900020795.1	aroE_2-gdh_5-gki_1-recP_11-spi_16-xpt_3-ddl_14	53	Unknown/Novel	CC 43
GCA_900021245.1	aroE_2-gdh_5-gki_1-recP_11-spi_16-xpt_3-ddl_14	53	17165	CC 43
GCA_900021405.1	aroE_2-gdh_5-gki_1-recP_11-spi_16-xpt_3-ddl_14	53	16989	CC 43
GCA_900022825.1	aroE_2-gdh_5-gki_1-recP_11-spi_16-xpt_3-ddl_14	53	17333	CC 43
GCA_900022855.1	aroE_2-gdh_5-gki_1-recP_11-spi_16-xpt_3-ddl_14	53	29691	CC 43
GCA_900022915.1	aroE_2-gdh_5-gki_1-recP_11-spi_16-xpt_3-ddl_14	53	29199	CC 43
GCA_900023355.1	aroE_2-gdh_574-gki_1-recP_11-spi_16-xpt_3-ddl_14	16570	29471	CC 43
GCA_900023445.1	aroE_2-gdh_5-gki_1-recP_11-spi_16-xpt_3-ddl_14	53	17260	CC 43
GCA_900023795.1	aroE_2-gdh_5-gki_1-recP_11-spi_16-xpt_3-ddl_14	53	Unknown/Novel	CC 43
GCA_900024095.1	aroE_2-gdh_5-gki_760-recP_11-spi_16-xpt_3-ddl_14	16574	Unknown/Novel	CC 43
GCA_900024795.1	aroE_2-gdh_5-gki_1-recP_11-spi_16-xpt_3-ddl_14	53	Unknown/Novel	CC 43
GCA_900025395.1	aroE_2-gdh_5-gki_1-recP_11-spi_16-xpt_3-ddl_14	53	17341	CC 43
GCA_900025835.1	aroE_2-gdh_5-gki_1-recP_11-spi_16-xpt_3-ddl_14	53	29577	CC 43
GCA_900025975.1	aroE_2-gdh_5-gki_1-recP_11-spi_16-xpt_3-ddl_14	53	29194	CC 43
GCA_900026205.1	aroE_2-gdh_5-gki_1-recP_11-spi_16-xpt_3-ddl_14	53	17235	CC 43
GCA_900026225.1	aroE_2-gdh_5-gki_1-recP_11-spi_16-xpt_3-ddl_14	53	17427	CC 43
GCA_900026285.1	aroE_2-gdh_5-gki_1-recP_11-spi_16-xpt_3-ddl_14	53	29379	CC 43
GCA_900026315.1	aroE_2-gdh_5-gki_1-recP_11-spi_16-xpt_3-ddl_14	53	Unknown/Novel	CC 43
GCA_900026345.1	aroE_2-gdh_5-gki_1-recP_11-spi_16-xpt_3-ddl_14	53	Unknown/Novel	CC 43
GCA_900026355.1	aroE_2-gdh_5-gki_1-recP_11-spi_16-xpt_3-ddl_14	53	Unknown/Novel	CC 43
GCA_900026535.1	aroE_2-gdh_5-gki_1-recP_11-spi_16-xpt_3-ddl_14	53	17596	CC 43
GCA_900027375.1	aroE_2-gdh_5-gki_1-recP_11-spi_16-xpt_3-ddl_14	53	17356	CC 43
GCA_900027625.1	aroE_2-gdh_5-gki_1-recP_11-spi_16-xpt_3-ddl_14	53	17609	CC 43
GCA_900028185.1	aroE_2-gdh_5-gki_1-recP_11-spi_16-xpt_3-ddl_14	53	17327	CC 43
GCA_900028375.1	aroE_2-gdh_5-gki_1-recP_11-spi_16-xpt_3-ddl_14	53	29403	CC 43
GCA_900028405.1	aroE_2-gdh_5-gki_1-recP_11-spi_16-xpt_3-ddl_14	53	Unknown/Novel	CC 43
GCA_900028445.1	aroE_2-gdh_5-gki_1-recP_11-spi_16-xpt_3-ddl_14	53	17103	CC 43
GCA_900028525.1	aroE_2-gdh_5-gki_1-recP_11-spi_16-xpt_3-ddl_14	53	Unknown/Novel	CC 43
GCA_900029425.1	aroE_2-gdh_5-gki_1-recP_11-spi_16-xpt_3-ddl_14	53	Unknown/Novel	CC 43
GCA_900029745.1	aroE_2-gdh_5-gki_1-recP_11-spi_16-xpt_3-ddl_14	53	Unknown/Novel	CC 43
GCA_900029955.1	aroE_2-gdh_5-gki_1-recP_11-spi_16-xpt_3-ddl_14	53	17252	CC 43
GCA_900030015.1	aroE_2-gdh_5-gki_1-recP_11-spi_16-xpt_3-ddl_14	53	17341	CC 43
GCA_900030215.1	aroE_2-gdh_5-gki_1-recP_11-spi_16-xpt_3-ddl_14	53	16975	CC 43
GCA_900030555.1	aroE_2-gdh_5-gki_1-recP_11-spi_16-xpt_3-ddl_14	53	17365	CC 43
GCA_900031375.1	aroE_2-gdh_5-gki_1-recP_11-spi_16-xpt_3-ddl_14	53	29693	CC 43
GCA_900031875.1	aroE_2-gdh_5-gki_1-recP_11-spi_16-xpt_3-ddl_14	53	17178	CC 43
GCA_900031975.1	aroE_2-gdh_5-gki_1-recP_11-spi_16-xpt_3-ddl_14	53	Unknown/Novel	CC 43
GCA_900032225.1	aroE_2-gdh_5-gki_1-recP_11-spi_16-xpt_3-ddl_14	53	Unknown/Novel	CC 43
GCA_900032315.1	aroE_2-gdh_574-gki_1-recP_11-spi_16-xpt_3-ddl_14	16570	29471	CC 43
GCA_900032385.1	aroE_2-gdh_5-gki_1-recP_11-spi_16-xpt_3-ddl_14	53	17609	CC 43
GCA_900033035.1	aroE_2-gdh_5-gki_1-recP_11-spi_16-xpt_3-ddl_14	53	29709	CC 43
GCA_900033435.1	aroE_2-gdh_5-gki_1-recP_11-spi_16-xpt_3-ddl_14	53	17235	CC 43
GCA_900034995.1	aroE_2-gdh_5-gki_1-recP_11-spi_16-xpt_3-ddl_14	53	17356	CC 43
GCA_900035025.1	aroE_2-gdh_5-gki_1-recP_11-spi_16-xpt_3-ddl_14	53	16985	CC 43
GCA_900036135.1	aroE_2-gdh_5-gki_1-recP_11-spi_16-xpt_3-ddl_14	53	17365	CC 43
GCA_900037485.1	aroE_2-gdh_5-gki_1-recP_11-spi_16-xpt_3-ddl_14	53	Unknown/Novel	CC 43
GCA_900039375.1	aroE_2-gdh_5-gki_1-recP_11-spi_16-xpt_3-ddl_14	53	29577	CC 43
GCA_900042835.1	aroE_2-gdh_5-gki_1-recP_11-spi_16-xpt_3-ddl_14	53	29553	CC 43
GCA_900046495.1	aroE_2-gdh_5-gki_1-recP_11-spi_16-xpt_3-ddl_14	53	Unknown/Novel	CC 43
GCA_900046545.1	aroE_2-gdh_5-gki_1-recP_11-spi_16-xpt_3-ddl_14	53	17427	CC 43
GCA_900046615.1	aroE_2-gdh_5-gki_1-recP_11-spi_16-xpt_3-ddl_14	53	17014	CC 43
GCA_900046975.1	aroE_2-gdh_5-gki_1-recP_11-spi_16-xpt_3-ddl_14	53	17078	CC 43
GCA_900047575.1	aroE_2-gdh_5-gki_760-recP_11-spi_16-xpt_3-ddl_14	16574	Unknown/Novel	CC 43
GCA_900047625.1	aroE_2-gdh_5-gki_1-recP_11-spi_16-xpt_3-ddl_14	53	Unknown/Novel	CC 43
GCA_900047665.1	aroE_2-gdh_5-gki_1-recP_11-spi_16-xpt_3-ddl_14	53	17103	CC 43
GCA_900047835.1	aroE_2-gdh_5-gki_1-recP_11-spi_16-xpt_3-ddl_14	53	29402	CC 43
GCA_900056995.1	aroE_2-gdh_5-gki_1-recP_11-spi_428-xpt_3-ddl_14	10155	Unknown/Novel	CC 43
GCA_900192065.1	aroE_2-gdh_5-gki_1-recP_11-spi_16-xpt_3-ddl_14	53	Unknown/Novel	CC 43
GCA_900459735.1	aroE_2-gdh_5-gki_1-recP_11-spi_16-xpt_3-ddl_14	53	Unknown/Novel	CC 43
GCA_900618125.1	aroE_2-gdh_5-gki_1-recP_11-spi_16-xpt_3-ddl_14	53	Unknown/Novel	CC 43
GCA_901214355.1	aroE_2-gdh_5-gki_1-recP_11-spi_16-xpt_3-ddl_14	53	15444	CC 43
GCA_901215005.1	aroE_65-gdh_5-gki_1-recP_11-spi_16-xpt_3-ddl_14	3847	15454	CC 43
GCA_901215275.1	aroE_2-gdh_5-gki_1-recP_11-spi_16-xpt_3-ddl_14	53	15459	CC 43
GCA_901216915.1	aroE_2-gdh_5-gki_1-recP_11-spi_16-xpt_3-ddl_14	53	28891	CC 43
GCA_901216945.1	aroE_2-gdh_5-gki_1-recP_11-spi_16-xpt_3-ddl_14	53	17637	CC 43
GCA_901218015.1	aroE_2-gdh_5-gki_1-recP_11-spi_16-xpt_3-ddl_14	53	17642	CC 43
GCA_901220775.1	aroE_2-gdh_5-gki_1-recP_11-spi_16-xpt_3-ddl_14	53	16155	CC 43
GCA_901221355.1	aroE_65-gdh_5-gki_1-recP_11-spi_16-xpt_3-ddl_14	3847	16900	CC 43
GCA_901222305.1	aroE_2-gdh_5-gki_1-recP_11-spi_16-xpt_3-ddl_14	53	28868	CC 43
GCA_901222885.1	aroE_2-gdh_5-gki_1-recP_11-spi_16-xpt_3-ddl_14	53	28867	CC 43
GCA_901222895.1	aroE_2-gdh_5-gki_1-recP_11-spi_16-xpt_3-ddl_14	53	28890	CC 43
GCA_901223205.1	aroE_2-gdh_5-gki_1-recP_11-spi_16-xpt_3-ddl_14	53	28889	CC 43
GCA_901223595.1	aroE_2-gdh_5-gki_1-recP_11-spi_16-xpt_3-ddl_14	53	Unknown/Novel	CC 43
GCA_901224225.1	aroE_2-gdh_5-gki_1-recP_11-spi_16-xpt_3-ddl_14	53	28888	CC 43
GCA_901224505.1	aroE_2-gdh_5-gki_1-recP_11-spi_16-xpt_3-ddl_14	53	Unknown/Novel	CC 43
GCA_901224775.1	aroE_2-gdh_5-gki_1-recP_11-spi_16-xpt_3-ddl_14	53	28866	CC 43
GCA_901225115.1	aroE_2-gdh_5-gki_1-recP_11-spi_16-xpt_3-ddl_14	53	16907	CC 43
GCA_901225185.1	aroE_65-gdh_5-gki_1-recP_11-spi_16-xpt_3-ddl_14	3847	16908	CC 43
GCA_901225305.1	aroE_2-gdh_5-gki_1-recP_11-spi_16-xpt_3-ddl_14	53	28883	CC 43
GCA_901226145.1	aroE_2-gdh_5-gki_1-recP_11-spi_16-xpt_3-ddl_14	53	16790	CC 43
GCA_901226665.1	aroE_2-gdh_5-gki_1-recP_11-spi_16-xpt_3-ddl_14	53	28875	CC 43
GCA_901226915.1	aroE_2-gdh_5-gki_1-recP_11-spi_16-xpt_3-ddl_14	53	28874	CC 43
GCA_901227155.1	aroE_2-gdh_5-gki_1-recP_11-spi_16-xpt_3-ddl_14	53	Unknown/Novel	CC 43
GCA_901227555.1	aroE_2-gdh_5-gki_1-recP_11-spi_16-xpt_3-ddl_14	53	Unknown/Novel	CC 43
GCA_901229255.1	aroE_2-gdh_5-gki_1-recP_11-spi_16-xpt_3-ddl_14	53	Unknown/Novel	CC 43
GCA_901229915.1	aroE_2-gdh_5-gki_1-recP_11-spi_16-xpt_3-ddl_14	53	16281	CC 43
GCA_901230605.1	aroE_2-gdh_5-gki_1-recP_367-spi_16-xpt_3-ddl_14	12542	15748	CC 43
GCA_901230705.1	aroE_2-gdh_5-gki_1-recP_11-spi_16-xpt_3-ddl_14	53	16801	CC 43
GCA_901230725.1	aroE_2-gdh_5-gki_1-recP_11-spi_16-xpt_3-ddl_14	53	Unknown/Novel	CC 43
GCA_901231335.1	aroE_65-gdh_5-gki_1-recP_11-spi_16-xpt_3-ddl_14	3847	15569	CC 43
GCA_901231955.1	aroE_2-gdh_5-gki_1-recP_11-spi_16-xpt_3-ddl_14	53	18170	CC 43
GCA_901233345.1	aroE_2-gdh_5-gki_1-recP_11-spi_16-xpt_3-ddl_14	53	28862	CC 43
GCA_901234895.1	aroE_2-gdh_5-gki_1-recP_11-spi_16-xpt_3-ddl_14	53	16924	CC 43
GCA_901234905.1	aroE_2-gdh_5-gki_1-recP_11-spi_16-xpt_3-ddl_14	53	18175	CC 43
GCA_901235135.1	aroE_2-gdh_5-gki_1-recP_11-spi_16-xpt_3-ddl_14	53	28886	CC 43
GCA_901235275.1	aroE_2-gdh_5-gki_1-recP_11-spi_16-xpt_3-ddl_14	53	28865	CC 43
GCA_901236455.1	aroE_2-gdh_5-gki_1-recP_11-spi_16-xpt_3-ddl_14	53	28864	CC 43
GCA_901237445.1	aroE_2-gdh_5-gki_1-recP_11-spi_16-xpt_3-ddl_14	53	28863	CC 43
GCA_901237665.1	aroE_2-gdh_5-gki_1-recP_11-spi_16-xpt_3-ddl_14	53	16932	CC 43
GCA_901238785.1	aroE_2-gdh_5-gki_1-recP_11-spi_16-xpt_3-ddl_14	53	Unknown/Novel	CC 43
GCA_901239375.1	aroE_2-gdh_5-gki_1-recP_11-spi_16-xpt_3-ddl_14	53	16934	CC 43
GCA_901239635.1	aroE_2-gdh_5-gki_1-recP_11-spi_16-xpt_3-ddl_14	53	17844	CC 43
GCA_901240275.1	aroE_2-gdh_5-gki_1-recP_11-spi_16-xpt_3-ddl_14	53	Unknown/Novel	CC 43
GCA_901240395.1	aroE_2-gdh_5-gki_1-recP_11-spi_16-xpt_3-ddl_14	53	28860	CC 43
GCA_901240605.1	aroE_65-gdh_5-gki_1-recP_11-spi_16-xpt_3-ddl_14	3847	28895	CC 43
GCA_901240825.1	aroE_2-gdh_5-gki_1-recP_11-spi_16-xpt_3-ddl_14	53	Unknown/Novel	CC 43
GCA_901241245.1	aroE_2-gdh_5-gki_1-recP_11-spi_16-xpt_3-ddl_14	53	17924	CC 43
GCA_901241265.1	aroE_2-gdh_5-gki_1-recP_11-spi_16-xpt_3-ddl_14	53	16878	CC 43
GCA_901241515.1	aroE_2-gdh_5-gki_1-recP_11-spi_16-xpt_3-ddl_14	53	28887	CC 43
GCA_901241965.1	aroE_65-gdh_5-gki_1-recP_11-spi_16-xpt_3-ddl_14	3847	38644	CC 43
GCA_901241995.1	aroE_65-gdh_5-gki_1-recP_11-spi_16-xpt_3-ddl_14	3847	17742	CC 43
GCA_901244035.1	aroE_2-gdh_5-gki_1-recP_11-spi_16-xpt_3-ddl_14	53	16530	CC 43
GCA_901244475.1	aroE_2-gdh_5-gki_1-recP_11-spi_16-xpt_3-ddl_14	53	18186	CC 43
GCA_901244645.1	aroE_65-gdh_5-gki_1-recP_11-spi_16-xpt_3-ddl_14	3847	Unknown/Novel	CC 43
GCA_901245285.1	aroE_2-gdh_5-gki_1-recP_11-spi_16-xpt_3-ddl_14	53	Unknown/Novel	CC 43
GCA_901245555.1	aroE_2-gdh_5-gki_1-recP_11-spi_528-xpt_3-ddl_14	12148	Unknown/Novel	CC 43
GCA_901245705.1	aroE_2-gdh_5-gki_1-recP_11-spi_16-xpt_3-ddl_14	53	19463	CC 43
GCA_901246195.1	aroE_65-gdh_5-gki_1-recP_11-spi_16-xpt_3-ddl_14	3847	16882	CC 43
GCA_901246455.1	aroE_2-gdh_5-gki_1-recP_11-spi_16-xpt_3-ddl_14	53	16235	CC 43
GCA_901246485.1	aroE_2-gdh_5-gki_1-recP_11-spi_16-xpt_3-ddl_14	53	16840	CC 43
GCA_901246995.1	aroE_2-gdh_5-gki_1-recP_11-spi_16-xpt_3-ddl_14	53	16842	CC 43
GCA_901247805.1	aroE_2-gdh_5-gki_1-recP_11-spi_16-xpt_3-ddl_14	53	Unknown/Novel	CC 43
GCA_901247855.1	aroE_2-gdh_5-gki_1-recP_11-spi_16-xpt_3-ddl_14	53	Unknown/Novel	CC 43
GCA_901248695.1	aroE_2-gdh_5-gki_1-recP_11-spi_16-xpt_3-ddl_14	53	Unknown/Novel	CC 43
GCA_901251125.1	aroE_65-gdh_5-gki_1-recP_11-spi_16-xpt_3-ddl_14	3847	18195	CC 43
GCA_901252775.1	aroE_2-gdh_5-gki_1-recP_11-spi_16-xpt_3-ddl_14	53	28880	CC 43
GCA_901253115.1	aroE_2-gdh_5-gki_1-recP_11-spi_16-xpt_3-ddl_14	53	16557	CC 43
GCA_901254135.1	aroE_2-gdh_5-gki_1-recP_11-spi_16-xpt_3-ddl_14	53	18200	CC 43
GCA_901254365.1	aroE_2-gdh_5-gki_1-recP_11-spi_16-xpt_3-ddl_14	53	16560	CC 43
GCA_901254675.1	aroE_2-gdh_5-gki_1-recP_11-spi_16-xpt_3-ddl_14	53	28870	CC 43
GCA_901256995.1	aroE_2-gdh_5-gki_1-recP_11-spi_16-xpt_3-ddl_14	53	15887	CC 43
GCA_901257835.1	aroE_2-gdh_5-gki_1-recP_11-spi_16-xpt_3-ddl_14	53	16573	CC 43
GCA_901261005.1	aroE_2-gdh_5-gki_1-recP_11-spi_16-xpt_703-ddl_14	12574	18094	CC 43
GCA_901261625.1	aroE_2-gdh_537-gki_1-recP_11-spi_16-xpt_3-ddl_14	12547	15902	CC 43
GCA_901261815.1	aroE_2-gdh_5-gki_1-recP_11-spi_16-xpt_3-ddl_14	53	Unknown/Novel	CC 43
GCA_901262975.1	aroE_2-gdh_5-gki_1-recP_11-spi_16-xpt_3-ddl_14	53	16560	CC 43
GCA_901263905.1	aroE_2-gdh_5-gki_1-recP_11-spi_16-xpt_3-ddl_14	53	15909	CC 43
GCA_901266025.1	aroE_2-gdh_5-gki_1-recP_11-spi_16-xpt_3-ddl_14	53	16599	CC 43
GCA_901266165.1	aroE_65-gdh_5-gki_1-recP_11-spi_16-xpt_3-ddl_14	3847	Unknown/Novel	CC 43
GCA_901267295.1	aroE_65-gdh_5-gki_1-recP_11-spi_16-xpt_3-ddl_14	3847	16605	CC 43
GCA_901267785.1	aroE_2-gdh_5-gki_1-recP_11-spi_16-xpt_3-ddl_14	53	28858	CC 43
GCA_901268025.1	aroE_2-gdh_5-gki_1-recP_11-spi_16-xpt_3-ddl_14	53	19284	CC 43
GCA_901272595.1	aroE_2-gdh_5-gki_1-recP_11-spi_16-xpt_3-ddl_14	53	Unknown/Novel	CC 43
GCA_901272805.1	aroE_2-gdh_5-gki_1-recP_11-spi_16-xpt_581-ddl_14	11074	Unknown/Novel	CC 43
GCA_901273235.1	aroE_2-gdh_5-gki_1-recP_11-spi_16-xpt_3-ddl_14	53	18101	CC 43
GCA_901273845.1	aroE_2-gdh_5-gki_1-recP_11-spi_16-xpt_3-ddl_14	53	Unknown/Novel	CC 43
GCA_901274255.1	aroE_2-gdh_5-gki_1-recP_11-spi_16-xpt_3-ddl_14	53	19314	CC 43
GCA_901276055.1	aroE_65-gdh_5-gki_1-recP_11-spi_16-xpt_3-ddl_14	3847	Unknown/Novel	CC 43
GCA_901276365.1	aroE_2-gdh_5-gki_1-recP_11-spi_16-xpt_3-ddl_14	53	Unknown/Novel	CC 43
GCA_901276775.1	aroE_2-gdh_5-gki_1-recP_11-spi_16-xpt_3-ddl_14	53	28872	CC 43
GCA_901277585.1	aroE_2-gdh_5-gki_1-recP_11-spi_16-xpt_3-ddl_14	53	Unknown/Novel	CC 43
GCA_901277675.1	aroE_2-gdh_5-gki_1-recP_11-spi_16-xpt_3-ddl_14	53	Unknown/Novel	CC 43
GCA_901279205.1	aroE_2-gdh_5-gki_1-recP_11-spi_16-xpt_3-ddl_14	53	28885	CC 43
GCA_901279525.1	aroE_2-gdh_5-gki_1-recP_11-spi_16-xpt_3-ddl_14	53	15868	CC 43
GCA_901279565.1	aroE_2-gdh_5-gki_1-recP_11-spi_16-xpt_3-ddl_14	53	Unknown/Novel	CC 43
GCA_901281635.1	aroE_2-gdh_5-gki_1-recP_11-spi_16-xpt_3-ddl_14	53	Unknown/Novel	CC 43
GCA_901282515.1	aroE_2-gdh_5-gki_1-recP_11-spi_16-xpt_3-ddl_14	53	16110	CC 43
GCA_901284365.1	aroE_65-gdh_5-gki_1-recP_11-spi_16-xpt_3-ddl_14	3847	15703	CC 43
GCA_901290555.1	aroE_2-gdh_5-gki_1-recP_11-spi_16-xpt_3-ddl_14	53	28856	CC 43
GCA_901293705.1	aroE_2-gdh_5-gki_1-recP_11-spi_16-xpt_3-ddl_14	53	28857	CC 43
GCA_901294735.1	aroE_2-gdh_5-gki_1-recP_11-spi_16-xpt_3-ddl_14	53	28847	CC 43
GCA_901294775.1	aroE_2-gdh_5-gki_1-recP_11-spi_16-xpt_3-ddl_14	53	28854	CC 43
GCA_901297215.1	aroE_2-gdh_5-gki_1-recP_11-spi_16-xpt_3-ddl_14	53	28853	CC 43
GCA_901297225.1	aroE_2-gdh_5-gki_1-recP_11-spi_190-xpt_3-ddl_14	3778	28894	CC 43
GCA_901297485.1	aroE_2-gdh_5-gki_1-recP_11-spi_16-xpt_3-ddl_14	53	28852	CC 43
GCA_901298555.1	aroE_2-gdh_5-gki_1-recP_11-spi_545-xpt_3-ddl_14	12823	28900	CC 43
GCA_901298745.1	aroE_2-gdh_5-gki_1-recP_11-spi_16-xpt_703-ddl_14	12574	28899	CC 43
GCA_901300405.1	aroE_2-gdh_5-gki_1-recP_11-spi_16-xpt_3-ddl_14	53	Unknown/Novel	CC 43
GCA_901300845.1	aroE_2-gdh_5-gki_1-recP_11-spi_16-xpt_3-ddl_14	53	18441	CC 43
GCA_901301785.1	aroE_2-gdh_5-gki_1-recP_11-spi_16-xpt_3-ddl_14	53	15707	CC 43
GCA_901303105.1	aroE_2-gdh_5-gki_1-recP_11-spi_16-xpt_3-ddl_14	53	28845	CC 43
GCA_901309195.1	aroE_2-gdh_5-gki_1-recP_11-spi_16-xpt_3-ddl_14	53	18811	CC 43
GCA_901310695.1	aroE_2-gdh_5-gki_1-recP_11-spi_16-xpt_3-ddl_14	53	28851	CC 43
GCA_901311115.1	aroE_2-gdh_5-gki_1-recP_11-spi_16-xpt_3-ddl_14	53	28846	CC 43
GCA_901314675.1	aroE_2-gdh_5-gki_1-recP_11-spi_16-xpt_3-ddl_14	53	Unknown/Novel	CC 43
GCA_901316805.1	aroE_2-gdh_5-gki_1-recP_11-spi_16-xpt_3-ddl_14	53	Unknown/Novel	CC 43
GCA_901319945.1	aroE_2-gdh_5-gki_1-recP_11-spi_16-xpt_3-ddl_14	53	18050	CC 43
GCA_901320535.1	aroE_2-gdh_5-gki_1-recP_11-spi_16-xpt_3-ddl_14	53	28881	CC 43
GCA_901324045.1	aroE_2-gdh_5-gki_1-recP_11-spi_16-xpt_3-ddl_14	53	19070	CC 43
GCA_901327105.1	aroE_2-gdh_5-gki_1-recP_11-spi_16-xpt_3-ddl_14	53	28844	CC 43
GCA_901328695.1	aroE_2-gdh_5-gki_1-recP_11-spi_16-xpt_3-ddl_14	53	Unknown/Novel	CC 43
GCA_901329245.1	aroE_2-gdh_5-gki_1-recP_11-spi_16-xpt_3-ddl_14	53	28878	CC 43
GCA_901330105.1	aroE_2-gdh_5-gki_1-recP_11-spi_16-xpt_3-ddl_14	53	28849	CC 43
GCA_901330985.1	aroE_2-gdh_5-gki_1-recP_11-spi_16-xpt_3-ddl_14	53	18108	CC 43
GCA_901331035.1	aroE_2-gdh_5-gki_1-recP_11-spi_16-xpt_3-ddl_14	53	28855	CC 43
GCA_901331215.1	aroE_2-gdh_5-gki_1-recP_11-spi_16-xpt_3-ddl_14	53	28848	CC 43
GCA_901333275.1	aroE_65-gdh_5-gki_1-recP_11-spi_16-xpt_3-ddl_14	3847	18110	CC 43
GCA_901334485.1	aroE_2-gdh_5-gki_1-recP_11-spi_16-xpt_3-ddl_14	53	16650	CC 43
GCA_901334595.1	aroE_2-gdh_5-gki_1-recP_11-spi_16-xpt_3-ddl_14	53	Unknown/Novel	CC 43
GCA_901335435.1	aroE_2-gdh_5-gki_1-recP_11-spi_16-xpt_3-ddl_14	53	16653	CC 43
GCA_901335875.1	aroE_2-gdh_5-gki_1-recP_11-spi_16-xpt_3-ddl_14	53	18116	CC 43
GCA_901336285.1	aroE_2-gdh_5-gki_1-recP_11-spi_16-xpt_3-ddl_14	53	18117	CC 43
GCA_901337185.1	aroE_2-gdh_5-gki_1-recP_11-spi_16-xpt_3-ddl_14	53	Unknown/Novel	CC 43
GCA_901337575.1	aroE_2-gdh_5-gki_1-recP_11-spi_16-xpt_3-ddl_14	53	16671	CC 43
GCA_901337895.1	aroE_2-gdh_5-gki_1-recP_11-spi_16-xpt_3-ddl_14	53	16678	CC 43
GCA_901338075.1	aroE_2-gdh_5-gki_1-recP_11-spi_16-xpt_3-ddl_14	53	Unknown/Novel	CC 43
GCA_901338135.1	aroE_2-gdh_5-gki_1-recP_11-spi_16-xpt_3-ddl_14	53	Unknown/Novel	CC 43
GCA_901338425.1	aroE_2-gdh_5-gki_1-recP_11-spi_16-xpt_3-ddl_14	53	28879	CC 43
GCA_901338805.1	aroE_2-gdh_5-gki_1-recP_11-spi_16-xpt_3-ddl_14	53	28876	CC 43
GCA_901338855.1	aroE_2-gdh_5-gki_1-recP_11-spi_16-xpt_3-ddl_14	53	Unknown/Novel	CC 43
GCA_901338965.1	aroE_2-gdh_5-gki_1-recP_11-spi_16-xpt_3-ddl_14	53	16711	CC 43
GCA_901339025.1	aroE_2-gdh_5-gki_1-recP_11-spi_16-xpt_3-ddl_14	53	16721	CC 43
GCA_901339095.1	aroE_2-gdh_5-gki_1-recP_11-spi_16-xpt_3-ddl_14	53	Unknown/Novel	CC 43
GCA_901339275.1	aroE_65-gdh_5-gki_1-recP_11-spi_16-xpt_3-ddl_14	3847	Unknown/Novel	CC 43
GCA_901339435.1	aroE_2-gdh_5-gki_1-recP_11-spi_16-xpt_3-ddl_14	53	16746	CC 43
GCA_901339545.1	aroE_2-gdh_5-gki_1-recP_11-spi_16-xpt_703-ddl_14	12574	Unknown/Novel	CC 43
GCA_901339595.1	aroE_2-gdh_5-gki_1-recP_11-spi_16-xpt_3-ddl_14	53	18149	CC 43
GCA_901339685.1	aroE_2-gdh_5-gki_1-recP_11-spi_16-xpt_3-ddl_14	53	18151	CC 43
GCA_901341405.1	aroE_2-gdh_5-gki_1-recP_11-spi_16-xpt_3-ddl_14	53	28843	CC 43
GCA_000171715.1	aroE_2-gdh_5-gki_29-recP_12-spi_16-xpt_3-ddl_14	62	6453	CC 33
GCA_001084725.2	aroE_2-gdh_5-gki_29-recP_12-spi_16-xpt_3-ddl_14	62	Unknown/Novel	CC 33
GCA_001087865.2	aroE_2-gdh_5-gki_6-recP_12-spi_16-xpt_3-ddl_14	408	Unknown/Novel	CC 33
GCA_001088985.2	aroE_2-gdh_5-gki_29-recP_12-spi_16-xpt_3-ddl_14	62	Unknown/Novel	CC 33
GCA_001089285.2	aroE_2-gdh_5-gki_29-recP_12-spi_16-xpt_3-ddl_14	62	2446	CC 33
GCA_001090825.2	aroE_2-gdh_5-gki_29-recP_12-spi_16-xpt_3-ddl_14	62	Unknown/Novel	CC 33
GCA_001090865.2	aroE_2-gdh_5-gki_29-recP_12-spi_16-xpt_3-ddl_14	62	2770	CC 33
GCA_001091265.2	aroE_2-gdh_5-gki_29-recP_12-spi_16-xpt_3-ddl_14	62	Unknown/Novel	CC 33
GCA_001092705.2	aroE_2-gdh_5-gki_29-recP_12-spi_16-xpt_3-ddl_14	62	Unknown/Novel	CC 33
GCA_001093145.2	aroE_2-gdh_5-gki_29-recP_12-spi_16-xpt_3-ddl_14	62	Unknown/Novel	CC 33
GCA_001095745.2	aroE_2-gdh_5-gki_29-recP_12-spi_16-xpt_3-ddl_14	62	Unknown/Novel	CC 33
GCA_001096865.2	aroE_2-gdh_5-gki_29-recP_12-spi_16-xpt_3-ddl_14	62	Unknown/Novel	CC 33
GCA_001097025.2	aroE_2-gdh_5-gki_29-recP_12-spi_16-xpt_3-ddl_14	62	Unknown/Novel	CC 33
GCA_001101565.2	aroE_2-gdh_5-gki_29-recP_12-spi_16-xpt_3-ddl_14	62	Unknown/Novel	CC 33
GCA_001102585.2	aroE_2-gdh_5-gki_29-recP_12-spi_16-xpt_3-ddl_14	62	Unknown/Novel	CC 33
GCA_001102805.2	aroE_2-gdh_5-gki_29-recP_12-spi_16-xpt_3-ddl_14	62	Unknown/Novel	CC 33
GCA_001104405.2	aroE_2-gdh_5-gki_29-recP_12-spi_16-xpt_3-ddl_14	62	Unknown/Novel	CC 33
GCA_001104805.2	aroE_2-gdh_5-gki_29-recP_12-spi_16-xpt_3-ddl_14	62	Unknown/Novel	CC 33
GCA_001105905.2	aroE_2-gdh_5-gki_29-recP_12-spi_16-xpt_3-ddl_14	62	Unknown/Novel	CC 33
GCA_001111205.2	aroE_2-gdh_5-gki_29-recP_12-spi_16-xpt_3-ddl_14	62	Unknown/Novel	CC 33
GCA_001111245.2	aroE_2-gdh_5-gki_29-recP_12-spi_16-xpt_3-ddl_14	62	Unknown/Novel	CC 33
GCA_001117905.2	aroE_2-gdh_5-gki_29-recP_12-spi_16-xpt_3-ddl_14	62	Unknown/Novel	CC 33
GCA_001118485.2	aroE_2-gdh_5-gki_29-recP_12-spi_16-xpt_3-ddl_14	62	Unknown/Novel	CC 33
GCA_001124005.2	aroE_2-gdh_5-gki_29-recP_12-spi_16-xpt_3-ddl_14	62	Unknown/Novel	CC 33
GCA_001126945.2	aroE_2-gdh_5-gki_29-recP_12-spi_16-xpt_3-ddl_14	62	Unknown/Novel	CC 33
GCA_001129025.2	aroE_2-gdh_5-gki_29-recP_12-spi_120-xpt_3-ddl_14	1913	Unknown/Novel	CC 33
GCA_001130665.2	aroE_2-gdh_5-gki_29-recP_12-spi_16-xpt_3-ddl_14	62	2787	CC 33
GCA_001131205.2	aroE_2-gdh_5-gki_29-recP_12-spi_16-xpt_3-ddl_14	62	Unknown/Novel	CC 33
GCA_001134465.2	aroE_2-gdh_5-gki_29-recP_12-spi_16-xpt_3-ddl_14	62	Unknown/Novel	CC 33
GCA_001139545.2	aroE_2-gdh_5-gki_29-recP_12-spi_16-xpt_3-ddl_14	62	Unknown/Novel	CC 33
GCA_001148565.2	aroE_2-gdh_5-gki_29-recP_12-spi_16-xpt_3-ddl_14	62	2443	CC 33
GCA_001149705.2	aroE_2-gdh_5-gki_29-recP_12-spi_16-xpt_3-ddl_14	62	Unknown/Novel	CC 33
GCA_001150885.2	aroE_2-gdh_5-gki_29-recP_12-spi_120-xpt_3-ddl_14	1913	2677	CC 33
GCA_001153205.2	aroE_2-gdh_5-gki_29-recP_12-spi_16-xpt_3-ddl_14	62	Unknown/Novel	CC 33
GCA_001161225.2	aroE_2-gdh_5-gki_29-recP_12-spi_16-xpt_3-ddl_14	62	Unknown/Novel	CC 33
GCA_001162665.2	aroE_2-gdh_5-gki_29-recP_12-spi_16-xpt_3-ddl_14	62	Unknown/Novel	CC 33
GCA_001163725.2	aroE_2-gdh_5-gki_29-recP_12-spi_16-xpt_3-ddl_14	62	2685	CC 33
GCA_001165765.2	aroE_2-gdh_5-gki_29-recP_12-spi_16-xpt_3-ddl_14	62	Unknown/Novel	CC 33
GCA_001166525.2	aroE_2-gdh_5-gki_29-recP_12-spi_16-xpt_3-ddl_14	62	Unknown/Novel	CC 33
GCA_001168205.2	aroE_2-gdh_5-gki_29-recP_12-spi_171-xpt_3-ddl_14	3276	Unknown/Novel	CC 33
GCA_001171025.2	aroE_2-gdh_5-gki_29-recP_12-spi_16-xpt_3-ddl_14	62	Unknown/Novel	CC 33
GCA_001299655.2	aroE_2-gdh_5-gki_29-recP_12-spi_16-xpt_3-ddl_14	62	Unknown/Novel	CC 33
GCA_001300315.2	aroE_2-gdh_5-gki_29-recP_12-spi_16-xpt_3-ddl_14	62	Unknown/Novel	CC 33
GCA_001300575.2	aroE_2-gdh_5-gki_29-recP_12-spi_120-xpt_3-ddl_14	1913	Unknown/Novel	CC 33
GCA_001301175.2	aroE_2-gdh_5-gki_29-recP_12-spi_16-xpt_3-ddl_14	62	2450	CC 33
GCA_001301195.2	aroE_2-gdh_5-gki_29-recP_12-spi_16-xpt_3-ddl_14	62	Unknown/Novel	CC 33
GCA_001301355.2	aroE_2-gdh_5-gki_29-recP_12-spi_16-xpt_3-ddl_14	62	Unknown/Novel	CC 33
GCA_001301815.2	aroE_2-gdh_5-gki_29-recP_12-spi_16-xpt_3-ddl_14	62	Unknown/Novel	CC 33
GCA_001301875.2	aroE_2-gdh_5-gki_29-recP_12-spi_16-xpt_3-ddl_14	62	Unknown/Novel	CC 33
GCA_009720985.1	aroE_2-gdh_5-gki_29-recP_12-spi_16-xpt_3-ddl_14	62	Unknown/Novel	CC 33
GCA_009721065.1	aroE_2-gdh_5-gki_29-recP_12-spi_16-xpt_3-ddl_14	62	Unknown/Novel	CC 33
GCA_019446595.1	aroE_2-gdh_5-gki_29-recP_12-spi_16-xpt_3-ddl_14	62	Unknown/Novel	CC 33
GCA_019457135.1	aroE_2-gdh_5-gki_29-recP_12-spi_16-xpt_3-ddl_14	62	Unknown/Novel	CC 33
GCA_900020145.1	aroE_2-gdh_5-gki_29-recP_12-spi_16-xpt_3-ddl_14	62	Unknown/Novel	CC 33
GCA_900023535.1	aroE_2-gdh_5-gki_29-recP_12-spi_16-xpt_3-ddl_14	62	Unknown/Novel	CC 33
GCA_900023545.1	aroE_2-gdh_5-gki_29-recP_12-spi_16-xpt_3-ddl_14	62	17311	CC 33
GCA_900024265.1	aroE_2-gdh_5-gki_29-recP_12-spi_16-xpt_3-ddl_14	62	29723	CC 33
GCA_900024535.1	aroE_2-gdh_5-gki_29-recP_12-spi_16-xpt_3-ddl_14	62	Unknown/Novel	CC 33
GCA_900025145.1	aroE_2-gdh_5-gki_29-recP_12-spi_16-xpt_3-ddl_14	62	17285	CC 33
GCA_900026265.1	aroE_2-gdh_5-gki_29-recP_12-spi_16-xpt_3-ddl_14	62	20476	CC 33
GCA_900027225.1	aroE_2-gdh_5-gki_29-recP_12-spi_16-xpt_987-ddl_14	16589	17947	CC 33
GCA_900027285.1	aroE_2-gdh_5-gki_29-recP_12-spi_16-xpt_3-ddl_14	62	Unknown/Novel	CC 33
GCA_900027645.1	aroE_2-gdh_5-gki_29-recP_12-spi_16-xpt_3-ddl_14	62	Unknown/Novel	CC 33
GCA_900028705.1	aroE_2-gdh_5-gki_29-recP_12-spi_16-xpt_3-ddl_14	62	Unknown/Novel	CC 33
GCA_900029475.1	aroE_2-gdh_5-gki_29-recP_12-spi_16-xpt_3-ddl_14	62	Unknown/Novel	CC 33
GCA_900030145.1	aroE_2-gdh_5-gki_29-recP_12-spi_16-xpt_3-ddl_14	62	17195	CC 33
GCA_900030745.1	aroE_2-gdh_5-gki_29-recP_12-spi_16-xpt_3-ddl_14	62	Unknown/Novel	CC 33
GCA_900030775.1	aroE_2-gdh_5-gki_29-recP_12-spi_16-xpt_3-ddl_14	62	Unknown/Novel	CC 33
GCA_900031145.1	aroE_2-gdh_5-gki_29-recP_12-spi_16-xpt_3-ddl_14	62	Unknown/Novel	CC 33
GCA_900031305.1	aroE_2-gdh_5-gki_29-recP_12-spi_16-xpt_3-ddl_14	62	29568	CC 33
GCA_900032345.1	aroE_2-gdh_5-gki_29-recP_12-spi_16-xpt_3-ddl_14	62	Unknown/Novel	CC 33
GCA_900032405.1	aroE_2-gdh_5-gki_29-recP_12-spi_16-xpt_987-ddl_14	16589	29741	CC 33
GCA_900041745.1	aroE_2-gdh_5-gki_29-recP_12-spi_16-xpt_3-ddl_14	62	Unknown/Novel	CC 33
GCA_900042345.1	aroE_2-gdh_5-gki_29-recP_12-spi_16-xpt_3-ddl_14	62	Unknown/Novel	CC 33
GCA_900043845.1	aroE_2-gdh_5-gki_29-recP_12-spi_16-xpt_3-ddl_14	62	Unknown/Novel	CC 33
GCA_900047555.1	aroE_2-gdh_5-gki_29-recP_12-spi_16-xpt_3-ddl_14	62	17195	CC 33
GCA_900048985.1	aroE_2-gdh_5-gki_29-recP_12-spi_16-xpt_3-ddl_14	62	Unknown/Novel	CC 33
GCA_900049505.2	aroE_2-gdh_5-gki_29-recP_12-spi_16-xpt_3-ddl_14	62	28819	CC 33
GCA_900053095.2	aroE_2-gdh_5-gki_29-recP_12-spi_16-xpt_3-ddl_14	62	28811	CC 33
GCA_900057025.2	aroE_2-gdh_5-gki_29-recP_12-spi_543-xpt_3-ddl_14	12735	28841	CC 33
GCA_900060555.2	aroE_2-gdh_5-gki_29-recP_12-spi_16-xpt_3-ddl_14	62	28812	CC 33
GCA_900064155.2	aroE_2-gdh_5-gki_29-recP_12-spi_16-xpt_3-ddl_14	62	28799	CC 33
GCA_900189045.1	aroE_2-gdh_5-gki_29-recP_12-spi_16-xpt_3-ddl_14	62	Unknown/Novel	CC 33
GCA_900189345.1	aroE_2-gdh_5-gki_29-recP_12-spi_16-xpt_3-ddl_14	62	Unknown/Novel	CC 33
GCA_900189735.1	aroE_2-gdh_5-gki_29-recP_12-spi_16-xpt_3-ddl_14	62	Unknown/Novel	CC 33
GCA_900189855.1	aroE_2-gdh_5-gki_29-recP_12-spi_16-xpt_3-ddl_14	62	Unknown/Novel	CC 33
GCA_900189895.1	aroE_2-gdh_5-gki_29-recP_12-spi_16-xpt_3-ddl_14	62	Unknown/Novel	CC 33
GCA_900189915.1	aroE_2-gdh_5-gki_29-recP_12-spi_16-xpt_3-ddl_14	62	Unknown/Novel	CC 33
GCA_900190015.1	aroE_2-gdh_5-gki_29-recP_12-spi_16-xpt_3-ddl_14	62	Unknown/Novel	CC 33
GCA_900190115.1	aroE_2-gdh_5-gki_29-recP_12-spi_16-xpt_3-ddl_14	62	Unknown/Novel	CC 33
GCA_900190615.1	aroE_2-gdh_5-gki_29-recP_12-spi_16-xpt_3-ddl_14	62	Unknown/Novel	CC 33
GCA_900190625.1	aroE_2-gdh_5-gki_29-recP_12-spi_16-xpt_3-ddl_14	62	Unknown/Novel	CC 33
GCA_900190725.1	aroE_2-gdh_5-gki_29-recP_12-spi_16-xpt_3-ddl_14	62	4721	CC 33
GCA_900190775.1	aroE_2-gdh_5-gki_29-recP_12-spi_16-xpt_3-ddl_14	62	Unknown/Novel	CC 33
GCA_900190965.1	aroE_2-gdh_5-gki_29-recP_12-spi_16-xpt_3-ddl_14	62	Unknown/Novel	CC 33
GCA_900191195.1	aroE_2-gdh_5-gki_29-recP_12-spi_16-xpt_3-ddl_14	62	Unknown/Novel	CC 33
GCA_900191455.1	aroE_2-gdh_5-gki_29-recP_12-spi_16-xpt_3-ddl_14	62	Unknown/Novel	CC 33
GCA_900191555.1	aroE_2-gdh_5-gki_29-recP_12-spi_16-xpt_3-ddl_14	62	Unknown/Novel	CC 33
GCA_900191565.1	aroE_2-gdh_5-gki_29-recP_12-spi_16-xpt_3-ddl_14	62	Unknown/Novel	CC 33
GCA_900191575.1	aroE_2-gdh_5-gki_29-recP_12-spi_16-xpt_3-ddl_14	62	Unknown/Novel	CC 33
GCA_900191735.1	aroE_2-gdh_5-gki_29-recP_12-spi_16-xpt_3-ddl_14	62	Unknown/Novel	CC 33
GCA_900191765.1	aroE_2-gdh_5-gki_29-recP_12-spi_16-xpt_3-ddl_14	62	Unknown/Novel	CC 33
GCA_900191775.1	aroE_2-gdh_5-gki_29-recP_12-spi_16-xpt_3-ddl_14	62	Unknown/Novel	CC 33
GCA_900191915.1	aroE_2-gdh_5-gki_29-recP_12-spi_16-xpt_3-ddl_14	62	Unknown/Novel	CC 33
GCA_900192005.1	aroE_2-gdh_5-gki_29-recP_12-spi_16-xpt_3-ddl_14	62	Unknown/Novel	CC 33
GCA_900192185.1	aroE_2-gdh_5-gki_29-recP_12-spi_16-xpt_3-ddl_14	62	Unknown/Novel	CC 33
GCA_900192385.1	aroE_2-gdh_5-gki_29-recP_12-spi_16-xpt_3-ddl_14	62	Unknown/Novel	CC 33
GCA_900192475.1	aroE_2-gdh_5-gki_29-recP_12-spi_16-xpt_3-ddl_14	62	Unknown/Novel	CC 33
GCA_900192555.1	aroE_2-gdh_5-gki_29-recP_12-spi_16-xpt_3-ddl_14	62	Unknown/Novel	CC 33
GCA_900192695.1	aroE_2-gdh_5-gki_29-recP_12-spi_16-xpt_3-ddl_14	62	Unknown/Novel	CC 33
GCA_900192765.1	aroE_2-gdh_5-gki_29-recP_12-spi_16-xpt_3-ddl_14	62	Unknown/Novel	CC 33
GCA_900192805.1	aroE_2-gdh_5-gki_29-recP_12-spi_16-xpt_3-ddl_14	62	Unknown/Novel	CC 33
GCA_900192845.1	aroE_2-gdh_5-gki_29-recP_12-spi_16-xpt_3-ddl_14	62	Unknown/Novel	CC 33
GCA_900193155.1	aroE_2-gdh_5-gki_29-recP_12-spi_16-xpt_3-ddl_14	62	Unknown/Novel	CC 33
GCA_900193175.1	aroE_2-gdh_5-gki_29-recP_12-spi_16-xpt_3-ddl_14	62	Unknown/Novel	CC 33
GCA_900193275.1	aroE_2-gdh_5-gki_29-recP_12-spi_16-xpt_3-ddl_606	9137	Unknown/Novel	CC 33
GCA_900193665.1	aroE_2-gdh_5-gki_29-recP_12-spi_16-xpt_3-ddl_14	62	Unknown/Novel	CC 33
GCA_900193825.1	aroE_2-gdh_5-gki_29-recP_12-spi_16-xpt_3-ddl_14	62	8923	CC 33
GCA_900193955.1	aroE_2-gdh_5-gki_29-recP_12-spi_16-xpt_3-ddl_14	62	Unknown/Novel	CC 33
GCA_900193975.1	aroE_2-gdh_5-gki_29-recP_12-spi_16-xpt_3-ddl_14	62	8936	CC 33
GCA_900194015.1	aroE_2-gdh_5-gki_29-recP_12-spi_16-xpt_3-ddl_14	62	Unknown/Novel	CC 33
GCA_900194045.1	aroE_2-gdh_5-gki_29-recP_12-spi_16-xpt_3-ddl_14	62	Unknown/Novel	CC 33
GCA_900194125.1	aroE_2-gdh_5-gki_29-recP_12-spi_16-xpt_3-ddl_14	62	Unknown/Novel	CC 33
GCA_900194395.1	aroE_2-gdh_5-gki_29-recP_12-spi_16-xpt_3-ddl_14	62	8978	CC 33
GCA_900194425.1	aroE_2-gdh_5-gki_29-recP_12-spi_16-xpt_3-ddl_14	62	8981	CC 33
GCA_900194445.1	aroE_2-gdh_5-gki_29-recP_12-spi_16-xpt_3-ddl_14	62	Unknown/Novel	CC 33
GCA_900194565.1	aroE_2-gdh_5-gki_29-recP_12-spi_16-xpt_3-ddl_14	62	Unknown/Novel	CC 33
GCA_900194765.1	aroE_2-gdh_5-gki_29-recP_12-spi_16-xpt_3-ddl_14	62	9015	CC 33
GCA_900194865.1	aroE_2-gdh_5-gki_29-recP_12-spi_16-xpt_672-ddl_14	11801	9024	CC 33
GCA_900194875.1	aroE_2-gdh_5-gki_29-recP_12-spi_16-xpt_3-ddl_14	62	Unknown/Novel	CC 33
GCA_900194995.1	aroE_2-gdh_5-gki_29-recP_12-spi_16-xpt_3-ddl_14	62	9037	CC 33
GCA_900195085.1	aroE_2-gdh_5-gki_29-recP_12-spi_16-xpt_3-ddl_14	62	Unknown/Novel	CC 33
GCA_901216845.1	aroE_2-gdh_5-gki_29-recP_12-spi_16-xpt_3-ddl_14	62	Unknown/Novel	CC 33
GCA_901217135.1	aroE_2-gdh_5-gki_29-recP_12-spi_16-xpt_3-ddl_14	62	Unknown/Novel	CC 33
GCA_901218475.1	aroE_2-gdh_5-gki_29-recP_12-spi_16-xpt_3-ddl_6	3000	28838	CC 33
GCA_901220045.1	aroE_2-gdh_5-gki_29-recP_12-spi_16-xpt_3-ddl_14	62	28805	CC 33
GCA_901220875.1	aroE_2-gdh_5-gki_29-recP_12-spi_16-xpt_3-ddl_14	62	Unknown/Novel	CC 33
GCA_901225955.1	aroE_2-gdh_5-gki_29-recP_12-spi_16-xpt_3-ddl_14	62	28804	CC 33
GCA_901227795.1	aroE_2-gdh_5-gki_29-recP_12-spi_16-xpt_3-ddl_14	62	Unknown/Novel	CC 33
GCA_901231065.1	aroE_2-gdh_5-gki_29-recP_12-spi_16-xpt_3-ddl_14	62	28816	CC 33
GCA_901231915.1	aroE_2-gdh_5-gki_29-recP_12-spi_16-xpt_3-ddl_14	62	28815	CC 33
GCA_901233255.1	aroE_2-gdh_5-gki_29-recP_12-spi_16-xpt_3-ddl_14	62	28814	CC 33
GCA_901235605.1	aroE_2-gdh_5-gki_29-recP_12-spi_16-xpt_3-ddl_14	62	Unknown/Novel	CC 33
GCA_901235815.1	aroE_2-gdh_5-gki_29-recP_12-spi_16-xpt_3-ddl_14	62	Unknown/Novel	CC 33
GCA_901238585.1	aroE_2-gdh_5-gki_29-recP_12-spi_16-xpt_3-ddl_14	62	28803	CC 33
GCA_901240075.1	aroE_2-gdh_5-gki_29-recP_12-spi_16-xpt_3-ddl_14	62	28821	CC 33
GCA_901242955.1	aroE_2-gdh_5-gki_29-recP_12-spi_16-xpt_3-ddl_14	62	9170	CC 33
GCA_901245135.1	aroE_2-gdh_5-gki_29-recP_12-spi_16-xpt_1-ddl_14	9750	9181	CC 33
GCA_901254635.1	aroE_2-gdh_5-gki_29-recP_12-spi_16-xpt_3-ddl_14	62	28802	CC 33
GCA_901255645.1	aroE_2-gdh_5-gki_29-recP_12-spi_16-xpt_3-ddl_14	62	Unknown/Novel	CC 33
GCA_901256075.1	aroE_2-gdh_5-gki_29-recP_12-spi_16-xpt_3-ddl_14	62	28801	CC 33
GCA_901257045.1	aroE_2-gdh_5-gki_29-recP_12-spi_16-xpt_3-ddl_14	62	28800	CC 33
GCA_901260195.1	aroE_2-gdh_5-gki_29-recP_12-spi_16-xpt_3-ddl_14	62	Unknown/Novel	CC 33
GCA_901274095.1	aroE_2-gdh_5-gki_29-recP_12-spi_16-xpt_3-ddl_14	62	28798	CC 33
GCA_901276525.1	aroE_2-gdh_5-gki_29-recP_12-spi_16-xpt_3-ddl_14	62	25423	CC 33
GCA_901282785.1	aroE_2-gdh_5-gki_29-recP_12-spi_16-xpt_3-ddl_14	62	Unknown/Novel	CC 33
GCA_901283055.1	aroE_2-gdh_5-gki_29-recP_12-spi_16-xpt_3-ddl_14	62	Unknown/Novel	CC 33
GCA_901284845.1	aroE_2-gdh_5-gki_29-recP_12-spi_16-xpt_3-ddl_14	62	28793	CC 33
GCA_901285115.1	aroE_2-gdh_5-gki_29-recP_12-spi_16-xpt_3-ddl_14	62	28827	CC 33
GCA_901290705.1	aroE_2-gdh_5-gki_29-recP_12-spi_16-xpt_3-ddl_14	62	28824	CC 33
GCA_901292635.1	aroE_2-gdh_5-gki_29-recP_12-spi_16-xpt_3-ddl_14	62	28785	CC 33
GCA_901293245.1	aroE_2-gdh_5-gki_29-recP_12-spi_14-xpt_3-ddl_6	1118	Unknown/Novel	CC 33
GCA_901294895.1	aroE_2-gdh_5-gki_29-recP_12-spi_16-xpt_3-ddl_14	62	28784	CC 33
GCA_901295485.1	aroE_2-gdh_5-gki_9-recP_12-spi_14-xpt_3-ddl_6	2880	Unknown/Novel	CC 33
GCA_901295815.1	aroE_7-gdh_5-gki_29-recP_266-spi_14-xpt_3-ddl_6	9838	Unknown/Novel	CC 33
GCA_901297565.1	aroE_2-gdh_5-gki_29-recP_12-spi_14-xpt_3-ddl_6	1118	Unknown/Novel	CC 33
GCA_901298485.1	aroE_2-gdh_5-gki_29-recP_12-spi_16-xpt_3-ddl_14	62	28783	CC 33
GCA_901303265.1	aroE_2-gdh_5-gki_29-recP_12-spi_171-xpt_3-ddl_14	3276	28839	CC 33
GCA_901303685.1	aroE_2-gdh_5-gki_29-recP_12-spi_16-xpt_3-ddl_14	62	28808	CC 33
GCA_901305965.1	aroE_2-gdh_5-gki_29-recP_12-spi_16-xpt_3-ddl_14	62	28806	CC 33
GCA_901306365.1	aroE_2-gdh_5-gki_29-recP_12-spi_14-xpt_3-ddl_6	1118	Unknown/Novel	CC 33
GCA_901307225.1	aroE_2-gdh_5-gki_9-recP_12-spi_14-xpt_3-ddl_6	2880	Unknown/Novel	CC 33
GCA_901307995.1	aroE_7-gdh_5-gki_29-recP_12-spi_14-xpt_3-ddl_6	2878	Unknown/Novel	CC 33
GCA_901308935.1	aroE_2-gdh_5-gki_29-recP_12-spi_16-xpt_3-ddl_14	62	28825	CC 33
GCA_901309555.1	aroE_7-gdh_5-gki_29-recP_12-spi_14-xpt_3-ddl_6	2878	28833	CC 33
GCA_901309945.1	aroE_2-gdh_5-gki_29-recP_12-spi_16-xpt_3-ddl_14	62	28797	CC 33
GCA_901310235.1	aroE_2-gdh_5-gki_29-recP_12-spi_16-xpt_3-ddl_14	62	28794	CC 33
GCA_901310685.1	aroE_2-gdh_5-gki_29-recP_12-spi_16-xpt_3-ddl_830	12755	Unknown/Novel	CC 33
GCA_901312445.1	aroE_2-gdh_5-gki_29-recP_12-spi_16-xpt_3-ddl_14	62	28786	CC 33
GCA_901313525.1	aroE_2-gdh_5-gki_29-recP_12-spi_14-xpt_3-ddl_6	1118	Unknown/Novel	CC 33
GCA_901314285.1	aroE_2-gdh_5-gki_29-recP_12-spi_16-xpt_3-ddl_14	62	Unknown/Novel	CC 33
GCA_901322365.1	aroE_2-gdh_5-gki_29-recP_12-spi_16-xpt_3-ddl_14	62	28796	CC 33
GCA_901328405.1	aroE_7-gdh_5-gki_29-recP_12-spi_14-xpt_3-ddl_6	2878	Unknown/Novel	CC 33
GCA_901328595.1	aroE_2-gdh_5-gki_29-recP_12-spi_16-xpt_3-ddl_6	3000	28837	CC 33
GCA_901331245.1	aroE_2-gdh_5-gki_29-recP_12-spi_16-xpt_3-ddl_14	62	28789	CC 33
GCA_901331795.1	aroE_2-gdh_5-gki_29-recP_12-spi_16-xpt_3-ddl_14	62	28788	CC 33
GCA_901333705.1	aroE_2-gdh_5-gki_29-recP_12-spi_16-xpt_3-ddl_14	62	28787	CC 33
GCA_901334065.1	aroE_2-gdh_5-gki_29-recP_12-spi_16-xpt_3-ddl_14	62	28782	CC 33
GCA_901334835.1	aroE_2-gdh_5-gki_29-recP_12-spi_16-xpt_3-ddl_14	62	28781	CC 33
GCA_901335975.1	aroE_2-gdh_5-gki_29-recP_12-spi_16-xpt_3-ddl_14	62	28792	CC 33
GCA_901337145.1	aroE_2-gdh_5-gki_29-recP_12-spi_16-xpt_3-ddl_14	62	28791	CC 33
GCA_901337665.1	aroE_2-gdh_5-gki_29-recP_12-spi_16-xpt_3-ddl_14	62	28790	CC 33
GCA_000468275.1	aroE_2-gdh_5-gki_36-recP_12-spi_17-xpt_21-ddl_14	63	31326	CC 4
GCA_001085345.1	aroE_11-gdh_5-gki_36-recP_12-spi_17-xpt_21-ddl_14	2108	1222	CC 4
GCA_001085665.1	aroE_2-gdh_5-gki_36-recP_12-spi_17-xpt_21-ddl_14	63	1125	CC 4
GCA_001085965.2	aroE_2-gdh_5-gki_36-recP_12-spi_17-xpt_21-ddl_14	63	Unknown/Novel	CC 4
GCA_001087505.2	aroE_2-gdh_5-gki_36-recP_12-spi_17-xpt_21-ddl_14	63	Unknown/Novel	CC 4
GCA_001088165.1	aroE_2-gdh_5-gki_36-recP_12-spi_17-xpt_21-ddl_14	63	1178	CC 4
GCA_001089425.1	aroE_2-gdh_5-gki_36-recP_12-spi_17-xpt_21-ddl_14	63	Unknown/Novel	CC 4
GCA_001089885.2	aroE_2-gdh_5-gki_36-recP_12-spi_17-xpt_21-ddl_14	63	2691	CC 4
GCA_001090645.1	aroE_11-gdh_5-gki_36-recP_12-spi_17-xpt_21-ddl_14	2108	1245	CC 4
GCA_001092085.1	aroE_11-gdh_5-gki_36-recP_12-spi_17-xpt_21-ddl_14	2108	1224	CC 4
GCA_001095925.1	aroE_2-gdh_5-gki_36-recP_12-spi_17-xpt_21-ddl_14	63	Unknown/Novel	CC 4
GCA_001096465.1	aroE_11-gdh_5-gki_36-recP_12-spi_17-xpt_21-ddl_14	2108	5615	CC 4
GCA_001098845.1	aroE_11-gdh_5-gki_36-recP_12-spi_17-xpt_21-ddl_14	2108	1223	CC 4
GCA_001099105.1	aroE_2-gdh_5-gki_36-recP_12-spi_17-xpt_21-ddl_14	63	1124	CC 4
GCA_001100145.1	aroE_2-gdh_5-gki_36-recP_12-spi_17-xpt_21-ddl_14	63	1158	CC 4
GCA_001100825.1	aroE_2-gdh_5-gki_36-recP_12-spi_17-xpt_21-ddl_14	63	Unknown/Novel	CC 4
GCA_001102345.1	aroE_2-gdh_5-gki_36-recP_12-spi_17-xpt_21-ddl_14	63	1190	CC 4
GCA_001102785.1	aroE_11-gdh_5-gki_36-recP_12-spi_17-xpt_21-ddl_14	2108	1241	CC 4
GCA_001103225.1	aroE_2-gdh_5-gki_36-recP_12-spi_17-xpt_21-ddl_14	63	1234	CC 4
GCA_001103765.2	aroE_2-gdh_5-gki_36-recP_12-spi_17-xpt_21-ddl_14	63	Unknown/Novel	CC 4
GCA_001105085.2	aroE_2-gdh_5-gki_36-recP_2-spi_17-xpt_21-ddl_14	1914	Unknown/Novel	CC 4
GCA_001105385.1	aroE_11-gdh_5-gki_36-recP_12-spi_17-xpt_21-ddl_14	2108	1146	CC 4
GCA_001105545.1	aroE_2-gdh_5-gki_36-recP_12-spi_17-xpt_21-ddl_14	63	Unknown/Novel	CC 4
GCA_001105605.2	aroE_2-gdh_5-gki_36-recP_2-spi_17-xpt_21-ddl_14	1914	Unknown/Novel	CC 4
GCA_001106125.1	aroE_11-gdh_5-gki_36-recP_12-spi_17-xpt_21-ddl_14	2108	1142	CC 4
GCA_001107445.1	aroE_2-gdh_5-gki_36-recP_12-spi_17-xpt_21-ddl_14	63	1153	CC 4
GCA_001107785.2	aroE_2-gdh_5-gki_36-recP_4-spi_17-xpt_21-ddl_14	1915	Unknown/Novel	CC 4
GCA_001108085.1	aroE_2-gdh_5-gki_36-recP_12-spi_17-xpt_21-ddl_14	63	Unknown/Novel	CC 4
GCA_001108145.1	aroE_2-gdh_5-gki_36-recP_12-spi_17-xpt_21-ddl_14	63	1238	CC 4
GCA_001108285.2	aroE_2-gdh_5-gki_36-recP_12-spi_17-xpt_21-ddl_14	63	Unknown/Novel	CC 4
GCA_001108565.1	aroE_11-gdh_5-gki_36-recP_12-spi_17-xpt_21-ddl_14	2108	1245	CC 4
GCA_001108805.1	aroE_2-gdh_5-gki_36-recP_12-spi_17-xpt_21-ddl_14	63	Unknown/Novel	CC 4
GCA_001109085.2	aroE_2-gdh_5-gki_36-recP_12-spi_17-xpt_21-ddl_14	63	43536	CC 4
GCA_001110585.1	aroE_2-gdh_5-gki_36-recP_12-spi_17-xpt_21-ddl_14	63	1164	CC 4
GCA_001111265.1	aroE_11-gdh_5-gki_36-recP_12-spi_17-xpt_21-ddl_14	2108	1245	CC 4
GCA_001111625.1	aroE_11-gdh_5-gki_36-recP_12-spi_17-xpt_21-ddl_14	2108	1242	CC 4
GCA_001111845.1	aroE_2-gdh_5-gki_36-recP_12-spi_17-xpt_21-ddl_14	63	1126	CC 4
GCA_001112285.1	aroE_2-gdh_5-gki_36-recP_12-spi_17-xpt_21-ddl_14	63	1186	CC 4
GCA_001112525.1	aroE_2-gdh_5-gki_36-recP_12-spi_17-xpt_21-ddl_14	63	1226	CC 4
GCA_001112605.1	aroE_2-gdh_5-gki_36-recP_12-spi_17-xpt_21-ddl_14	63	1176	CC 4
GCA_001114465.2	aroE_2-gdh_5-gki_36-recP_12-spi_17-xpt_21-ddl_14	63	Unknown/Novel	CC 4
GCA_001115925.1	aroE_11-gdh_5-gki_36-recP_12-spi_431-xpt_21-ddl_14	10413	1244	CC 4
GCA_001116585.1	aroE_2-gdh_5-gki_36-recP_12-spi_17-xpt_21-ddl_14	63	5634	CC 4
GCA_001119105.1	aroE_2-gdh_5-gki_36-recP_12-spi_17-xpt_21-ddl_14	63	1182	CC 4
GCA_001122745.1	aroE_11-gdh_5-gki_36-recP_12-spi_17-xpt_21-ddl_14	2108	1231	CC 4
GCA_001123245.1	aroE_2-gdh_5-gki_36-recP_12-spi_17-xpt_21-ddl_14	63	1137	CC 4
GCA_001124625.1	aroE_2-gdh_5-gki_36-recP_12-spi_17-xpt_21-ddl_14	63	1218	CC 4
GCA_001124905.1	aroE_11-gdh_5-gki_36-recP_12-spi_17-xpt_21-ddl_14	2108	1233	CC 4
GCA_001125825.1	aroE_2-gdh_5-gki_36-recP_12-spi_17-xpt_21-ddl_14	63	Unknown/Novel	CC 4
GCA_001127165.1	aroE_11-gdh_5-gki_36-recP_12-spi_17-xpt_21-ddl_14	2108	1143	CC 4
GCA_001127325.2	aroE_2-gdh_5-gki_36-recP_12-spi_17-xpt_21-ddl_14	63	Unknown/Novel	CC 4
GCA_001128005.1	aroE_2-gdh_5-gki_36-recP_12-spi_17-xpt_21-ddl_14	63	1118	CC 4
GCA_001129445.1	aroE_11-gdh_5-gki_36-recP_12-spi_17-xpt_21-ddl_14	2108	1246	CC 4
GCA_001129765.2	aroE_2-gdh_5-gki_36-recP_12-spi_17-xpt_21-ddl_14	63	43569	CC 4
GCA_001130165.2	aroE_2-gdh_5-gki_36-recP_12-spi_17-xpt_21-ddl_14	63	Unknown/Novel	CC 4
GCA_001131265.1	aroE_2-gdh_5-gki_36-recP_12-spi_17-xpt_21-ddl_14	63	Unknown/Novel	CC 4
GCA_001131805.1	aroE_2-gdh_5-gki_36-recP_12-spi_17-xpt_21-ddl_14	63	1120	CC 4
GCA_001132105.1	aroE_2-gdh_5-gki_36-recP_12-spi_17-xpt_21-ddl_14	63	5652	CC 4
GCA_001134445.1	aroE_11-gdh_5-gki_36-recP_12-spi_17-xpt_21-ddl_14	2108	1227	CC 4
GCA_001135645.2	aroE_2-gdh_5-gki_36-recP_2-spi_17-xpt_21-ddl_14	1914	Unknown/Novel	CC 4
GCA_001136925.1	aroE_11-gdh_5-gki_36-recP_12-spi_17-xpt_21-ddl_14	2108	1233	CC 4
GCA_001137145.1	aroE_11-gdh_5-gki_36-recP_12-spi_17-xpt_21-ddl_14	2108	1235	CC 4
GCA_001137185.2	aroE_2-gdh_5-gki_36-recP_12-spi_17-xpt_21-ddl_14	63	Unknown/Novel	CC 4
GCA_001137225.1	aroE_2-gdh_5-gki_36-recP_12-spi_17-xpt_21-ddl_14	63	1121	CC 4
GCA_001137685.1	aroE_11-gdh_5-gki_36-recP_12-spi_17-xpt_21-ddl_14	2108	1147	CC 4
GCA_001141485.2	aroE_2-gdh_5-gki_36-recP_12-spi_17-xpt_21-ddl_14	63	Unknown/Novel	CC 4
GCA_001144625.1	aroE_11-gdh_5-gki_36-recP_12-spi_17-xpt_21-ddl_14	2108	1247	CC 4
GCA_001146945.1	aroE_11-gdh_5-gki_36-recP_12-spi_17-xpt_21-ddl_14	2108	6276	CC 4
GCA_001147525.1	aroE_2-gdh_5-gki_36-recP_12-spi_17-xpt_21-ddl_14	63	5495	CC 4
GCA_001147845.1	aroE_2-gdh_5-gki_36-recP_12-spi_17-xpt_21-ddl_14	63	1130	CC 4
GCA_001149345.1	aroE_2-gdh_5-gki_36-recP_12-spi_17-xpt_21-ddl_14	63	1225	CC 4
GCA_001150505.1	aroE_2-gdh_5-gki_36-recP_12-spi_17-xpt_21-ddl_14	63	1218	CC 4
GCA_001151305.1	aroE_11-gdh_5-gki_36-recP_12-spi_17-xpt_21-ddl_14	2108	1230	CC 4
GCA_001152545.1	aroE_2-gdh_5-gki_36-recP_12-spi_17-xpt_21-ddl_14	63	1215	CC 4
GCA_001154305.1	aroE_2-gdh_5-gki_36-recP_12-spi_17-xpt_21-ddl_14	63	7491	CC 4
GCA_001154485.2	aroE_2-gdh_5-gki_36-recP_12-spi_17-xpt_21-ddl_14	63	Unknown/Novel	CC 4
GCA_001158045.1	aroE_2-gdh_5-gki_36-recP_12-spi_17-xpt_21-ddl_14	63	5633	CC 4
GCA_001161725.1	aroE_2-gdh_5-gki_36-recP_12-spi_17-xpt_21-ddl_14	63	1131	CC 4
GCA_001163205.1	aroE_2-gdh_5-gki_36-recP_12-spi_17-xpt_21-ddl_14	63	1219	CC 4
GCA_001164585.1	aroE_11-gdh_5-gki_36-recP_12-spi_17-xpt_21-ddl_14	2108	1242	CC 4
GCA_001166885.1	aroE_2-gdh_5-gki_36-recP_12-spi_17-xpt_21-ddl_14	63	1228	CC 4
GCA_001169205.1	aroE_2-gdh_5-gki_36-recP_12-spi_17-xpt_21-ddl_14	63	1158	CC 4
GCA_001169365.1	aroE_11-gdh_5-gki_36-recP_12-spi_17-xpt_21-ddl_14	2108	1148	CC 4
GCA_001170605.1	aroE_11-gdh_5-gki_36-recP_12-spi_17-xpt_21-ddl_14	2108	1221	CC 4
GCA_001173325.1	aroE_11-gdh_5-gki_36-recP_12-spi_17-xpt_21-ddl_14	2108	1236	CC 4
GCA_001192595.1	aroE_2-gdh_5-gki_36-recP_12-spi_17-xpt_21-ddl_14	63	1217	CC 4
GCA_001197615.1	aroE_2-gdh_5-gki_36-recP_12-spi_17-xpt_21-ddl_14	63	Unknown/Novel	CC 4
GCA_001199075.1	aroE_2-gdh_5-gki_36-recP_12-spi_17-xpt_21-ddl_14	63	1139	CC 4
GCA_001199475.1	aroE_2-gdh_5-gki_36-recP_12-spi_17-xpt_21-ddl_14	63	1219	CC 4
GCA_001202275.1	aroE_2-gdh_5-gki_36-recP_12-spi_17-xpt_21-ddl_14	63	Unknown/Novel	CC 4
GCA_001203575.1	aroE_2-gdh_5-gki_36-recP_12-spi_17-xpt_21-ddl_14	63	1132	CC 4
GCA_001205655.1	aroE_2-gdh_5-gki_36-recP_12-spi_17-xpt_21-ddl_14	63	1200	CC 4
GCA_001205725.1	aroE_2-gdh_5-gki_36-recP_12-spi_17-xpt_21-ddl_14	63	1128	CC 4
GCA_001205975.1	aroE_2-gdh_5-gki_36-recP_16-spi_17-xpt_21-ddl_14	4899	1293	CC 4
GCA_001300515.2	aroE_2-gdh_5-gki_36-recP_12-spi_17-xpt_21-ddl_14	63	2794	CC 4
GCA_001300695.2	aroE_2-gdh_5-gki_36-recP_12-spi_17-xpt_21-ddl_14	63	2692	CC 4
GCA_001300715.2	aroE_2-gdh_5-gki_36-recP_12-spi_17-xpt_21-ddl_14	63	Unknown/Novel	CC 4
GCA_001301335.2	aroE_2-gdh_5-gki_36-recP_4-spi_17-xpt_21-ddl_14	1915	Unknown/Novel	CC 4
GCA_001301475.2	aroE_2-gdh_5-gki_36-recP_4-spi_17-xpt_21-ddl_14	1915	Unknown/Novel	CC 4
GCA_001301555.2	aroE_2-gdh_5-gki_36-recP_12-spi_17-xpt_21-ddl_14	63	Unknown/Novel	CC 4
GCA_001302135.2	aroE_2-gdh_5-gki_36-recP_12-spi_17-xpt_21-ddl_14	63	Unknown/Novel	CC 4
GCA_001335115.1	aroE_2-gdh_5-gki_36-recP_12-spi_17-xpt_21-ddl_14	63	1155	CC 4
GCA_001335155.1	aroE_2-gdh_5-gki_36-recP_12-spi_17-xpt_21-ddl_14	63	1122	CC 4
GCA_001335175.1	aroE_2-gdh_5-gki_36-recP_12-spi_17-xpt_21-ddl_14	63	5632	CC 4
GCA_001335795.1	aroE_2-gdh_5-gki_36-recP_12-spi_17-xpt_21-ddl_14	63	1156	CC 4
GCA_001337315.1	aroE_2-gdh_5-gki_36-recP_12-spi_17-xpt_21-ddl_14	63	1129	CC 4
GCA_001341015.1	aroE_2-gdh_5-gki_36-recP_12-spi_17-xpt_21-ddl_14	63	1135	CC 4
GCA_001341415.1	aroE_2-gdh_5-gki_36-recP_12-spi_17-xpt_21-ddl_14	63	1214	CC 4
GCA_001342375.1	aroE_2-gdh_5-gki_36-recP_12-spi_17-xpt_21-ddl_14	63	1138	CC 4
GCA_001344075.1	aroE_11-gdh_5-gki_36-recP_12-spi_17-xpt_21-ddl_14	2108	1220	CC 4
GCA_001346075.1	aroE_11-gdh_5-gki_36-recP_12-spi_17-xpt_21-ddl_14	2108	1242	CC 4
GCA_001346795.1	aroE_2-gdh_5-gki_36-recP_12-spi_17-xpt_21-ddl_14	63	1232	CC 4
GCA_001346935.1	aroE_11-gdh_5-gki_36-recP_12-spi_17-xpt_21-ddl_14	2108	1237	CC 4
GCA_001347075.1	aroE_2-gdh_5-gki_36-recP_12-spi_17-xpt_21-ddl_14	63	1188	CC 4
GCA_001347155.1	aroE_11-gdh_5-gki_36-recP_12-spi_17-xpt_21-ddl_14	2108	1144	CC 4
GCA_001347215.1	aroE_2-gdh_5-gki_36-recP_12-spi_17-xpt_21-ddl_14	63	1141	CC 4
GCA_001347355.1	aroE_11-gdh_5-gki_36-recP_12-spi_17-xpt_21-ddl_14	2108	1242	CC 4
GCA_001347635.1	aroE_2-gdh_5-gki_36-recP_12-spi_17-xpt_21-ddl_14	63	1248	CC 4
GCA_001347695.1	aroE_11-gdh_5-gki_36-recP_12-spi_17-xpt_21-ddl_14	2108	1145	CC 4
GCA_001348075.1	aroE_11-gdh_5-gki_36-recP_12-spi_17-xpt_21-ddl_14	2108	1240	CC 4
GCA_001348115.1	aroE_2-gdh_5-gki_36-recP_12-spi_17-xpt_21-ddl_14	63	1130	CC 4
GCA_001720085.1	aroE_2-gdh_5-gki_36-recP_281-spi_17-xpt_21-ddl_14	10238	Unknown/Novel	CC 4
GCA_005780125.1	aroE_2-gdh_5-gki_36-recP_12-spi_17-xpt_21-ddl_14	63	Unknown/Novel	CC 4
GCA_009720845.1	aroE_2-gdh_5-gki_36-recP_12-spi_17-xpt_21-ddl_14	63	Unknown/Novel	CC 4
GCA_012584355.1	aroE_2-gdh_5-gki_36-recP_12-spi_17-xpt_21-ddl_14	63	Unknown/Novel	CC 4
GCA_012911765.1	aroE_2-gdh_5-gki_36-recP_12-spi_9-xpt_21-ddl_14	2447	29147	CC 4
GCA_016878905.1	aroE_2-gdh_5-gki_36-recP_12-spi_17-xpt_21-ddl_14	63	Unknown/Novel	CC 4
GCA_019398505.1	aroE_2-gdh_5-gki_36-recP_12-spi_17-xpt_21-ddl_14	63	Unknown/Novel	CC 4
GCA_019446215.1	aroE_2-gdh_5-gki_36-recP_12-spi_17-xpt_21-ddl_14	63	Unknown/Novel	CC 4
GCA_020139315.1	aroE_2-gdh_5-gki_36-recP_12-spi_17-xpt_21-ddl_14	63	Unknown/Novel	CC 4
GCA_020139335.1	aroE_2-gdh_5-gki_36-recP_12-spi_17-xpt_21-ddl_14	63	Unknown/Novel	CC 4
GCA_020139385.1	aroE_2-gdh_5-gki_36-recP_12-spi_17-xpt_21-ddl_14	63	Unknown/Novel	CC 4
GCA_020139415.1	aroE_2-gdh_5-gki_36-recP_12-spi_17-xpt_21-ddl_14	63	Unknown/Novel	CC 4
GCA_020139475.1	aroE_2-gdh_5-gki_36-recP_12-spi_17-xpt_21-ddl_14	63	Unknown/Novel	CC 4
GCA_900049215.1	aroE_2-gdh_5-gki_36-recP_12-spi_17-xpt_21-ddl_14	63	Unknown/Novel	CC 4
GCA_900049525.2	aroE_2-gdh_5-gki_36-recP_12-spi_17-xpt_21-ddl_14	63	28685	CC 4
GCA_900050505.1	aroE_2-gdh_5-gki_36-recP_12-spi_17-xpt_21-ddl_14	63	Unknown/Novel	CC 4
GCA_900052405.2	aroE_2-gdh_5-gki_36-recP_12-spi_17-xpt_21-ddl_14	63	Unknown/Novel	CC 4
GCA_900053045.2	aroE_2-gdh_5-gki_36-recP_12-spi_17-xpt_21-ddl_14	63	12919	CC 4
GCA_900055725.2	aroE_2-gdh_5-gki_36-recP_12-spi_17-xpt_21-ddl_14	63	28667	CC 4
GCA_900056385.2	aroE_2-gdh_5-gki_36-recP_12-spi_17-xpt_21-ddl_14	63	28684	CC 4
GCA_900057395.2	aroE_2-gdh_5-gki_36-recP_12-spi_17-xpt_21-ddl_14	63	Unknown/Novel	CC 4
GCA_900061135.2	aroE_299-gdh_5-gki_36-recP_12-spi_17-xpt_21-ddl_14	9939	28769	CC 4
GCA_900189565.1	aroE_2-gdh_5-gki_36-recP_12-spi_17-xpt_21-ddl_14	63	Unknown/Novel	CC 4
GCA_900190935.1	aroE_2-gdh_5-gki_36-recP_12-spi_17-xpt_21-ddl_14	63	Unknown/Novel	CC 4
GCA_900192505.1	aroE_2-gdh_5-gki_36-recP_12-spi_17-xpt_21-ddl_14	63	4779	CC 4
GCA_900192565.1	aroE_2-gdh_5-gki_36-recP_12-spi_17-xpt_21-ddl_14	63	Unknown/Novel	CC 4
GCA_900192825.1	aroE_2-gdh_5-gki_36-recP_12-spi_17-xpt_21-ddl_14	63	Unknown/Novel	CC 4
GCA_900192975.1	aroE_2-gdh_5-gki_36-recP_12-spi_17-xpt_21-ddl_14	63	Unknown/Novel	CC 4
GCA_900193225.1	aroE_2-gdh_5-gki_36-recP_12-spi_17-xpt_21-ddl_14	63	Unknown/Novel	CC 4
GCA_900194175.1	aroE_2-gdh_5-gki_36-recP_12-spi_17-xpt_21-ddl_14	63	8957	CC 4
GCA_900194675.1	aroE_2-gdh_5-gki_36-recP_12-spi_17-xpt_21-ddl_14	63	9009	CC 4
GCA_900195025.1	aroE_2-gdh_5-gki_36-recP_12-spi_17-xpt_21-ddl_14	63	Unknown/Novel	CC 4
GCA_900195215.1	aroE_2-gdh_5-gki_36-recP_12-spi_17-xpt_21-ddl_14	63	Unknown/Novel	CC 4
GCA_901213515.1	aroE_2-gdh_5-gki_36-recP_12-spi_17-xpt_21-ddl_5	782	28706	CC 4
GCA_901214045.1	aroE_2-gdh_5-gki_36-recP_12-spi_17-xpt_21-ddl_14	63	17626	CC 4
GCA_901214125.1	aroE_2-gdh_5-gki_36-recP_12-spi_17-xpt_21-ddl_14	63	28689	CC 4
GCA_901214385.1	aroE_2-gdh_5-gki_36-recP_12-spi_17-xpt_21-ddl_14	63	Unknown/Novel	CC 4
GCA_901214765.1	aroE_2-gdh_5-gki_36-recP_12-spi_17-xpt_21-ddl_14	63	Unknown/Novel	CC 4
GCA_901214925.1	aroE_2-gdh_5-gki_36-recP_12-spi_17-xpt_21-ddl_14	63	15453	CC 4
GCA_901215465.1	aroE_2-gdh_5-gki_36-recP_12-spi_17-xpt_21-ddl_14	63	28615	CC 4
GCA_901216695.1	aroE_2-gdh_5-gki_36-recP_12-spi_17-xpt_21-ddl_14	63	28614	CC 4
GCA_901216955.1	aroE_2-gdh_5-gki_36-recP_12-spi_17-xpt_21-ddl_14	63	28613	CC 4
GCA_901219595.1	aroE_2-gdh_5-gki_36-recP_12-spi_17-xpt_21-ddl_14	63	Unknown/Novel	CC 4
GCA_901219715.1	aroE_2-gdh_5-gki_36-recP_12-spi_17-xpt_21-ddl_14	63	28611	CC 4
GCA_901220005.1	aroE_2-gdh_5-gki_36-recP_12-spi_17-xpt_21-ddl_14	63	15712	CC 4
GCA_901220565.1	aroE_2-gdh_5-gki_36-recP_12-spi_17-xpt_21-ddl_14	63	28645	CC 4
GCA_901220845.1	aroE_2-gdh_5-gki_36-recP_12-spi_17-xpt_21-ddl_14	63	Unknown/Novel	CC 4
GCA_901221045.1	aroE_2-gdh_5-gki_36-recP_12-spi_17-xpt_21-ddl_14	63	Unknown/Novel	CC 4
GCA_901221175.1	aroE_2-gdh_8-gki_4-recP_12-spi_17-xpt_21-ddl_14	7061	Unknown/Novel	CC 4
GCA_901221255.1	aroE_2-gdh_5-gki_36-recP_12-spi_17-xpt_21-ddl_14	63	8562	CC 4
GCA_901221985.1	aroE_2-gdh_5-gki_36-recP_12-spi_17-xpt_386-ddl_14	5285	Unknown/Novel	CC 4
GCA_901222065.1	aroE_2-gdh_5-gki_36-recP_12-spi_17-xpt_21-ddl_14	63	16159	CC 4
GCA_901223675.1	aroE_2-gdh_5-gki_36-recP_1-spi_17-xpt_49-ddl_14	10967	Unknown/Novel	CC 4
GCA_901223995.1	aroE_2-gdh_5-gki_36-recP_12-spi_17-xpt_21-ddl_14	63	Unknown/Novel	CC 4
GCA_901224365.1	aroE_2-gdh_5-gki_36-recP_12-spi_17-xpt_21-ddl_14	63	Unknown/Novel	CC 4
GCA_901224435.1	aroE_2-gdh_5-gki_36-recP_12-spi_17-xpt_21-ddl_14	63	Unknown/Novel	CC 4
GCA_901224665.1	aroE_2-gdh_8-gki_4-recP_18-spi_17-xpt_21-ddl_14	4902	Unknown/Novel	CC 4
GCA_901226205.1	aroE_2-gdh_5-gki_36-recP_12-spi_17-xpt_21-ddl_14	63	Unknown/Novel	CC 4
GCA_901227675.1	aroE_2-gdh_8-gki_36-recP_12-spi_17-xpt_21-ddl_14	2414	Unknown/Novel	CC 4
GCA_901227975.1	aroE_2-gdh_5-gki_36-recP_12-spi_17-xpt_21-ddl_14	63	28644	CC 4
GCA_901228025.1	aroE_2-gdh_5-gki_36-recP_12-spi_17-xpt_386-ddl_14	5285	28748	CC 4
GCA_901228465.1	aroE_2-gdh_5-gki_36-recP_12-spi_17-xpt_21-ddl_14	63	28655	CC 4
GCA_901228905.1	aroE_2-gdh_250-gki_36-recP_12-spi_17-xpt_21-ddl_14	10737	15740	CC 4
GCA_901229355.1	aroE_2-gdh_5-gki_36-recP_12-spi_17-xpt_21-ddl_14	63	8633	CC 4
GCA_901229675.1	aroE_2-gdh_5-gki_36-recP_12-spi_17-xpt_21-ddl_14	63	Unknown/Novel	CC 4
GCA_901230435.1	aroE_2-gdh_5-gki_36-recP_12-spi_17-xpt_21-ddl_14	63	28692	CC 4
GCA_901230545.1	aroE_2-gdh_5-gki_97-recP_12-spi_2-xpt_21-ddl_14	11018	Unknown/Novel	CC 4
GCA_901230715.1	aroE_2-gdh_5-gki_36-recP_12-spi_17-xpt_21-ddl_14	63	Unknown/Novel	CC 4
GCA_901231685.1	aroE_2-gdh_38-gki_36-recP_12-spi_17-xpt_21-ddl_14	7551	Unknown/Novel	CC 4
GCA_901232125.1	aroE_2-gdh_5-gki_36-recP_12-spi_17-xpt_386-ddl_14	5285	28747	CC 4
GCA_901232165.1	aroE_2-gdh_5-gki_36-recP_12-spi_17-xpt_21-ddl_14	63	28690	CC 4
GCA_901234385.1	aroE_2-gdh_5-gki_36-recP_12-spi_17-xpt_21-ddl_14	63	Unknown/Novel	CC 4
GCA_901234415.1	aroE_2-gdh_5-gki_36-recP_12-spi_17-xpt_21-ddl_14	63	17835	CC 4
GCA_901234525.1	aroE_2-gdh_5-gki_36-recP_5-spi_17-xpt_386-ddl_14	11022	Unknown/Novel	CC 4
GCA_901234925.1	aroE_2-gdh_5-gki_36-recP_12-spi_17-xpt_21-ddl_14	63	16494	CC 4
GCA_901234985.1	aroE_2-gdh_5-gki_36-recP_12-spi_17-xpt_21-ddl_14	63	15580	CC 4
GCA_901235315.1	aroE_2-gdh_5-gki_36-recP_12-spi_17-xpt_386-ddl_14	5285	Unknown/Novel	CC 4
GCA_901235905.1	aroE_2-gdh_38-gki_36-recP_70-spi_17-xpt_21-ddl_14	11026	Unknown/Novel	CC 4
GCA_901236305.1	aroE_2-gdh_5-gki_36-recP_12-spi_17-xpt_21-ddl_14	63	Unknown/Novel	CC 4
GCA_901236465.1	aroE_2-gdh_5-gki_36-recP_12-spi_548-xpt_386-ddl_14	12787	Unknown/Novel	CC 4
GCA_901237335.1	aroE_2-gdh_5-gki_36-recP_12-spi_17-xpt_21-ddl_14	63	28648	CC 4
GCA_901237475.1	aroE_2-gdh_5-gki_36-recP_12-spi_17-xpt_21-ddl_14	63	28648	CC 4
GCA_901238755.1	aroE_2-gdh_8-gki_36-recP_12-spi_17-xpt_21-ddl_14	2414	16046	CC 4
GCA_901239645.1	aroE_2-gdh_8-gki_36-recP_12-spi_17-xpt_21-ddl_14	2414	18613	CC 4
GCA_901240125.1	aroE_2-gdh_38-gki_36-recP_12-spi_17-xpt_386-ddl_14	7552	28767	CC 4
GCA_901241055.1	aroE_2-gdh_5-gki_36-recP_12-spi_17-xpt_21-ddl_14	63	Unknown/Novel	CC 4
GCA_901241145.1	aroE_8-gdh_5-gki_36-recP_12-spi_17-xpt_386-ddl_14	11030	Unknown/Novel	CC 4
GCA_901241325.1	aroE_2-gdh_8-gki_36-recP_12-spi_17-xpt_21-ddl_14	2414	28719	CC 4
GCA_901241645.1	aroE_2-gdh_5-gki_36-recP_12-spi_17-xpt_21-ddl_5	782	Unknown/Novel	CC 4
GCA_901242215.1	aroE_2-gdh_5-gki_36-recP_12-spi_17-xpt_21-ddl_5	782	Unknown/Novel	CC 4
GCA_901242495.1	aroE_2-gdh_5-gki_36-recP_1-spi_17-xpt_21-ddl_14	4532	Unknown/Novel	CC 4
GCA_901242575.1	aroE_2-gdh_5-gki_36-recP_12-spi_17-xpt_21-ddl_14	63	Unknown/Novel	CC 4
GCA_901242885.1	aroE_2-gdh_5-gki_36-recP_12-spi_17-xpt_21-ddl_14	63	Unknown/Novel	CC 4
GCA_901243985.1	aroE_2-gdh_5-gki_36-recP_12-spi_17-xpt_21-ddl_14	63	Unknown/Novel	CC 4
GCA_901244765.1	aroE_2-gdh_5-gki_36-recP_12-spi_17-xpt_386-ddl_14	5285	28744	CC 4
GCA_901245425.1	aroE_2-gdh_5-gki_36-recP_12-spi_17-xpt_21-ddl_5	782	Unknown/Novel	CC 4
GCA_901245575.1	aroE_2-gdh_5-gki_36-recP_12-spi_17-xpt_21-ddl_14	63	Unknown/Novel	CC 4
GCA_901246235.1	aroE_2-gdh_5-gki_36-recP_12-spi_17-xpt_386-ddl_14	5285	28745	CC 4
GCA_901246685.1	aroE_2-gdh_5-gki_36-recP_12-spi_17-xpt_21-ddl_685	11687	17673	CC 4
GCA_901247565.1	aroE_2-gdh_5-gki_36-recP_12-spi_2-xpt_21-ddl_14	11041	Unknown/Novel	CC 4
GCA_901247695.1	aroE_2-gdh_5-gki_36-recP_12-spi_17-xpt_21-ddl_14	63	Unknown/Novel	CC 4
GCA_901247875.1	aroE_2-gdh_5-gki_36-recP_12-spi_2-xpt_21-ddl_14	11041	Unknown/Novel	CC 4
GCA_901248735.1	aroE_2-gdh_5-gki_36-recP_12-spi_17-xpt_21-ddl_14	63	Unknown/Novel	CC 4
GCA_901249445.1	aroE_2-gdh_5-gki_36-recP_12-spi_17-xpt_21-ddl_14	63	Unknown/Novel	CC 4
GCA_901249585.1	aroE_2-gdh_5-gki_36-recP_12-spi_17-xpt_21-ddl_14	63	14858	CC 4
GCA_901249615.1	aroE_2-gdh_5-gki_36-recP_12-spi_17-xpt_21-ddl_14	63	Unknown/Novel	CC 4
GCA_901249785.1	aroE_2-gdh_5-gki_36-recP_12-spi_17-xpt_21-ddl_14	63	Unknown/Novel	CC 4
GCA_901250125.1	aroE_2-gdh_5-gki_36-recP_12-spi_17-xpt_21-ddl_14	63	Unknown/Novel	CC 4
GCA_901251555.1	aroE_2-gdh_5-gki_36-recP_12-spi_17-xpt_386-ddl_14	5285	Unknown/Novel	CC 4
GCA_901252235.1	aroE_2-gdh_8-gki_36-recP_12-spi_17-xpt_21-ddl_14	2414	Unknown/Novel	CC 4
GCA_901252265.1	aroE_2-gdh_5-gki_36-recP_12-spi_17-xpt_21-ddl_14	63	17574	CC 4
GCA_901252285.1	aroE_2-gdh_5-gki_36-recP_12-spi_17-xpt_386-ddl_14	5285	28742	CC 4
GCA_901254115.1	aroE_2-gdh_8-gki_36-recP_12-spi_17-xpt_21-ddl_14	2414	Unknown/Novel	CC 4
GCA_901255245.1	aroE_2-gdh_5-gki_36-recP_12-spi_17-xpt_21-ddl_14	63	Unknown/Novel	CC 4
GCA_901255965.1	aroE_2-gdh_5-gki_36-recP_12-spi_17-xpt_21-ddl_14	63	Unknown/Novel	CC 4
GCA_901256775.1	aroE_2-gdh_5-gki_36-recP_28-spi_17-xpt_49-ddl_14	4040	Unknown/Novel	CC 4
GCA_901257545.1	aroE_2-gdh_5-gki_36-recP_12-spi_17-xpt_21-ddl_14	63	15016	CC 4
GCA_901258815.1	aroE_2-gdh_5-gki_36-recP_12-spi_17-xpt_21-ddl_14	63	17778	CC 4
GCA_901259845.1	aroE_2-gdh_5-gki_36-recP_12-spi_8-xpt_21-ddl_14	2100	Unknown/Novel	CC 4
GCA_901259895.1	aroE_2-gdh_5-gki_36-recP_12-spi_17-xpt_21-ddl_14	63	Unknown/Novel	CC 4
GCA_901260075.1	aroE_2-gdh_5-gki_36-recP_12-spi_9-xpt_21-ddl_14	2447	Unknown/Novel	CC 4
GCA_901260865.1	aroE_2-gdh_5-gki_36-recP_12-spi_17-xpt_21-ddl_14	63	14557	CC 4
GCA_901261885.1	aroE_2-gdh_5-gki_36-recP_12-spi_9-xpt_21-ddl_14	2447	Unknown/Novel	CC 4
GCA_901262345.1	aroE_2-gdh_5-gki_36-recP_12-spi_17-xpt_21-ddl_14	63	Unknown/Novel	CC 4
GCA_901263125.1	aroE_2-gdh_5-gki_36-recP_12-spi_9-xpt_21-ddl_14	2447	Unknown/Novel	CC 4
GCA_901263175.1	aroE_2-gdh_5-gki_36-recP_12-spi_17-xpt_21-ddl_14	63	28679	CC 4
GCA_901263955.1	aroE_2-gdh_5-gki_36-recP_12-spi_17-xpt_21-ddl_14	63	28659	CC 4
GCA_901268185.1	aroE_2-gdh_5-gki_36-recP_12-spi_17-xpt_21-ddl_14	63	Unknown/Novel	CC 4
GCA_901268285.1	aroE_2-gdh_5-gki_36-recP_12-spi_17-xpt_21-ddl_14	63	Unknown/Novel	CC 4
GCA_901268665.1	aroE_2-gdh_5-gki_36-recP_12-spi_17-xpt_21-ddl_14	63	Unknown/Novel	CC 4
GCA_901269095.1	aroE_2-gdh_5-gki_36-recP_12-spi_17-xpt_21-ddl_14	63	28682	CC 4
GCA_901270095.1	aroE_2-gdh_5-gki_36-recP_12-spi_9-xpt_21-ddl_14	2447	28724	CC 4
GCA_901272535.1	aroE_2-gdh_5-gki_36-recP_12-spi_17-xpt_21-ddl_5	782	Unknown/Novel	CC 4
GCA_901272745.1	aroE_2-gdh_5-gki_36-recP_12-spi_17-xpt_21-ddl_540	8324	28768	CC 4
GCA_901273115.1	aroE_2-gdh_5-gki_36-recP_12-spi_17-xpt_21-ddl_685	11687	15947	CC 4
GCA_901273705.1	aroE_2-gdh_5-gki_36-recP_15-spi_17-xpt_21-ddl_14	1191	Unknown/Novel	CC 4
GCA_901273875.1	aroE_2-gdh_5-gki_36-recP_12-spi_17-xpt_21-ddl_14	63	Unknown/Novel	CC 4
GCA_901274115.1	aroE_2-gdh_5-gki_36-recP_12-spi_17-xpt_21-ddl_14	63	Unknown/Novel	CC 4
GCA_901274655.1	aroE_2-gdh_5-gki_36-recP_12-spi_17-xpt_21-ddl_14	63	Unknown/Novel	CC 4
GCA_901276115.1	aroE_2-gdh_9-gki_36-recP_12-spi_17-xpt_21-ddl_14	4907	Unknown/Novel	CC 4
GCA_901276515.1	aroE_2-gdh_5-gki_36-recP_12-spi_17-xpt_21-ddl_14	63	14673	CC 4
GCA_901276585.1	aroE_2-gdh_5-gki_36-recP_12-spi_17-xpt_21-ddl_14	63	Unknown/Novel	CC 4
GCA_901276945.1	aroE_2-gdh_5-gki_36-recP_12-spi_17-xpt_21-ddl_14	63	28666	CC 4
GCA_901277625.1	aroE_2-gdh_5-gki_36-recP_12-spi_27-xpt_21-ddl_14	3310	28729	CC 4
GCA_901278365.1	aroE_2-gdh_8-gki_36-recP_13-spi_17-xpt_21-ddl_14	10758	17809	CC 4
GCA_901279025.1	aroE_2-gdh_5-gki_36-recP_12-spi_9-xpt_21-ddl_14	2447	Unknown/Novel	CC 4
GCA_901279135.1	aroE_2-gdh_5-gki_36-recP_12-spi_17-xpt_21-ddl_14	63	Unknown/Novel	CC 4
GCA_901279295.1	aroE_2-gdh_8-gki_36-recP_12-spi_17-xpt_21-ddl_14	2414	15996	CC 4
GCA_901279335.1	aroE_2-gdh_5-gki_36-recP_12-spi_17-xpt_21-ddl_14	63	28678	CC 4
GCA_901279475.1	aroE_2-gdh_5-gki_36-recP_12-spi_17-xpt_21-ddl_14	63	28674	CC 4
GCA_901279755.1	aroE_2-gdh_5-gki_36-recP_12-spi_17-xpt_21-ddl_14	63	28677	CC 4
GCA_901279975.1	aroE_2-gdh_5-gki_36-recP_12-spi_17-xpt_21-ddl_14	63	Unknown/Novel	CC 4
GCA_901280015.1	aroE_2-gdh_5-gki_36-recP_12-spi_17-xpt_21-ddl_14	63	28672	CC 4
GCA_901280285.1	aroE_2-gdh_5-gki_36-recP_12-spi_17-xpt_21-ddl_14	63	28671	CC 4
GCA_901280355.1	aroE_2-gdh_5-gki_36-recP_12-spi_17-xpt_21-ddl_14	63	Unknown/Novel	CC 4
GCA_901280395.1	aroE_2-gdh_5-gki_36-recP_12-spi_17-xpt_21-ddl_14	63	28669	CC 4
GCA_901280515.1	aroE_2-gdh_8-gki_36-recP_12-spi_17-xpt_21-ddl_14	2414	Unknown/Novel	CC 4
GCA_901281305.1	aroE_2-gdh_5-gki_36-recP_12-spi_17-xpt_21-ddl_14	63	Unknown/Novel	CC 4
GCA_901281325.1	aroE_2-gdh_5-gki_36-recP_12-spi_17-xpt_21-ddl_14	63	Unknown/Novel	CC 4
GCA_901282095.1	aroE_2-gdh_5-gki_36-recP_12-spi_17-xpt_21-ddl_14	63	Unknown/Novel	CC 4
GCA_901282255.1	aroE_2-gdh_5-gki_36-recP_12-spi_17-xpt_21-ddl_14	63	28680	CC 4
GCA_901282365.1	aroE_2-gdh_5-gki_532-recP_12-spi_17-xpt_21-ddl_14	12555	16106	CC 4
GCA_901283135.1	aroE_2-gdh_5-gki_36-recP_12-spi_17-xpt_21-ddl_14	63	16120	CC 4
GCA_901283845.1	aroE_2-gdh_5-gki_36-recP_12-spi_17-xpt_21-ddl_14	63	12817	CC 4
GCA_901284255.1	aroE_2-gdh_5-gki_36-recP_12-spi_17-xpt_21-ddl_14	63	28676	CC 4
GCA_901284325.1	aroE_2-gdh_8-gki_36-recP_12-spi_17-xpt_21-ddl_14	2414	16137	CC 4
GCA_901285395.1	aroE_2-gdh_5-gki_36-recP_12-spi_17-xpt_21-ddl_14	63	28715	CC 4
GCA_901289115.1	aroE_2-gdh_5-gki_36-recP_12-spi_17-xpt_21-ddl_14	63	28634	CC 4
GCA_901289645.1	aroE_2-gdh_60-gki_36-recP_12-spi_17-xpt_21-ddl_14	2678	28728	CC 4
GCA_901290125.1	aroE_2-gdh_5-gki_36-recP_12-spi_17-xpt_21-ddl_14	63	28699	CC 4
GCA_901290245.1	aroE_2-gdh_5-gki_4-recP_12-spi_17-xpt_21-ddl_14	861	28709	CC 4
GCA_901291175.1	aroE_2-gdh_5-gki_36-recP_12-spi_17-xpt_21-ddl_14	63	Unknown/Novel	CC 4
GCA_901291405.1	aroE_2-gdh_5-gki_36-recP_12-spi_17-xpt_21-ddl_14	63	28700	CC 4
GCA_901291815.1	aroE_2-gdh_5-gki_36-recP_12-spi_17-xpt_21-ddl_14	63	28696	CC 4
GCA_901292405.1	aroE_2-gdh_5-gki_36-recP_12-spi_17-xpt_21-ddl_14	63	28701	CC 4
GCA_901293445.1	aroE_2-gdh_5-gki_36-recP_12-spi_17-xpt_386-ddl_14	5285	Unknown/Novel	CC 4
GCA_901293475.1	aroE_2-gdh_5-gki_36-recP_12-spi_17-xpt_21-ddl_14	63	28625	CC 4
GCA_901294085.1	aroE_2-gdh_5-gki_15-recP_12-spi_17-xpt_21-ddl_14	11685	Unknown/Novel	CC 4
GCA_901295145.1	aroE_2-gdh_5-gki_36-recP_12-spi_17-xpt_21-ddl_14	63	28633	CC 4
GCA_901295225.1	aroE_2-gdh_5-gki_36-recP_12-spi_17-xpt_21-ddl_14	63	28630	CC 4
GCA_901295635.1	aroE_2-gdh_5-gki_36-recP_12-spi_17-xpt_21-ddl_14	63	28643	CC 4
GCA_901295825.1	aroE_2-gdh_5-gki_36-recP_12-spi_17-xpt_21-ddl_14	63	28628	CC 4
GCA_901296185.1	aroE_2-gdh_5-gki_36-recP_1-spi_17-xpt_49-ddl_14	10967	14516	CC 4
GCA_901296425.1	aroE_2-gdh_5-gki_36-recP_12-spi_17-xpt_21-ddl_14	63	28639	CC 4
GCA_901296705.1	aroE_2-gdh_5-gki_36-recP_12-spi_17-xpt_21-ddl_14	63	28638	CC 4
GCA_901298565.1	aroE_2-gdh_5-gki_36-recP_12-spi_17-xpt_21-ddl_14	63	28637	CC 4
GCA_901298815.1	aroE_2-gdh_5-gki_36-recP_12-spi_17-xpt_21-ddl_14	63	28641	CC 4
GCA_901299405.1	aroE_2-gdh_5-gki_36-recP_12-spi_17-xpt_21-ddl_14	63	28626	CC 4
GCA_901299665.1	aroE_2-gdh_5-gki_36-recP_12-spi_17-xpt_21-ddl_14	63	28640	CC 4
GCA_901300365.1	aroE_2-gdh_5-gki_36-recP_1-spi_17-xpt_49-ddl_14	10967	14598	CC 4
GCA_901301745.1	aroE_2-gdh_5-gki_624-recP_12-spi_17-xpt_21-ddl_14	13952	28779	CC 4
GCA_901301975.1	aroE_2-gdh_5-gki_36-recP_12-spi_17-xpt_21-ddl_14	63	28635	CC 4
GCA_901303415.1	aroE_2-gdh_5-gki_36-recP_12-spi_17-xpt_21-ddl_14	63	28621	CC 4
GCA_901303905.1	aroE_2-gdh_5-gki_36-recP_12-spi_17-xpt_21-ddl_14	63	12905	CC 4
GCA_901304245.1	aroE_2-gdh_5-gki_36-recP_12-spi_17-xpt_21-ddl_14	63	28619	CC 4
GCA_901304365.1	aroE_2-gdh_5-gki_36-recP_12-spi_17-xpt_21-ddl_14	63	Unknown/Novel	CC 4
GCA_901306705.1	aroE_2-gdh_5-gki_539-recP_12-spi_17-xpt_21-ddl_14	12559	Unknown/Novel	CC 4
GCA_901306995.1	aroE_2-gdh_5-gki_36-recP_12-spi_17-xpt_21-ddl_14	63	28702	CC 4
GCA_901307065.1	aroE_2-gdh_5-gki_36-recP_12-spi_17-xpt_21-ddl_685	11687	Unknown/Novel	CC 4
GCA_901307075.1	aroE_2-gdh_5-gki_36-recP_12-spi_17-xpt_21-ddl_14	63	Unknown/Novel	CC 4
GCA_901307155.1	aroE_6-gdh_8-gki_36-recP_12-spi_17-xpt_21-ddl_14	4652	57089	CC 4
GCA_901307185.1	aroE_2-gdh_5-gki_4-recP_12-spi_17-xpt_21-ddl_14	861	Unknown/Novel	CC 4
GCA_901308075.1	aroE_2-gdh_5-gki_36-recP_12-spi_17-xpt_21-ddl_14	63	28695	CC 4
GCA_901308285.1	aroE_2-gdh_5-gki_36-recP_12-spi_17-xpt_21-ddl_14	63	28776	CC 4
GCA_901308525.1	aroE_10-gdh_5-gki_36-recP_12-spi_17-xpt_21-ddl_14	5004	16390	CC 4
GCA_901309145.1	aroE_2-gdh_5-gki_36-recP_12-spi_17-xpt_21-ddl_14	63	28636	CC 4
GCA_901310075.1	aroE_4-gdh_5-gki_36-recP_12-spi_17-xpt_21-ddl_14	12360	28777	CC 4
GCA_901310195.1	aroE_2-gdh_5-gki_36-recP_12-spi_17-xpt_21-ddl_14	63	28714	CC 4
GCA_901310275.1	aroE_2-gdh_5-gki_36-recP_12-spi_17-xpt_21-ddl_14	63	28624	CC 4
GCA_901310665.1	aroE_2-gdh_5-gki_36-recP_12-spi_17-xpt_21-ddl_14	63	28712	CC 4
GCA_901310845.1	aroE_2-gdh_5-gki_36-recP_12-spi_17-xpt_21-ddl_14	63	Unknown/Novel	CC 4
GCA_901311515.1	aroE_2-gdh_5-gki_36-recP_12-spi_17-xpt_21-ddl_14	63	28718	CC 4
GCA_901311655.1	aroE_2-gdh_5-gki_36-recP_12-spi_17-xpt_21-ddl_14	63	28627	CC 4
GCA_901311765.1	aroE_2-gdh_5-gki_36-recP_10-spi_17-xpt_21-ddl_14	12364	28778	CC 4
GCA_901311795.1	aroE_2-gdh_5-gki_36-recP_12-spi_17-xpt_21-ddl_14	63	28711	CC 4
GCA_901312275.1	aroE_2-gdh_5-gki_36-recP_12-spi_17-xpt_21-ddl_14	63	Unknown/Novel	CC 4
GCA_901312435.1	aroE_2-gdh_5-gki_36-recP_12-spi_17-xpt_21-ddl_14	63	28699	CC 4
GCA_901312655.1	aroE_2-gdh_5-gki_36-recP_12-spi_17-xpt_21-ddl_14	63	28697	CC 4
GCA_901312695.1	aroE_2-gdh_5-gki_36-recP_12-spi_17-xpt_21-ddl_126	6043	28754	CC 4
GCA_901313005.1	aroE_2-gdh_5-gki_36-recP_12-spi_17-xpt_21-ddl_14	63	28693	CC 4
GCA_901313015.1	aroE_2-gdh_5-gki_36-recP_12-spi_17-xpt_21-ddl_14	63	28623	CC 4
GCA_901313455.1	aroE_2-gdh_2-gki_36-recP_12-spi_17-xpt_21-ddl_14	9352	18858	CC 4
GCA_901313495.1	aroE_2-gdh_5-gki_36-recP_12-spi_17-xpt_21-ddl_14	63	28622	CC 4
GCA_901314315.1	aroE_2-gdh_5-gki_36-recP_1-spi_17-xpt_49-ddl_14	10967	14764	CC 4
GCA_901315275.1	aroE_2-gdh_5-gki_36-recP_12-spi_17-xpt_21-ddl_14	63	Unknown/Novel	CC 4
GCA_901315905.1	aroE_2-gdh_5-gki_29-recP_12-spi_17-xpt_21-ddl_14	2675	28727	CC 4
GCA_901315925.1	aroE_2-gdh_5-gki_36-recP_12-spi_17-xpt_21-ddl_14	63	16436	CC 4
GCA_901316205.1	aroE_2-gdh_5-gki_36-recP_12-spi_17-xpt_21-ddl_14	63	14540	CC 4
GCA_901316495.1	aroE_2-gdh_5-gki_36-recP_12-spi_17-xpt_21-ddl_14	63	14759	CC 4
GCA_901316765.1	aroE_2-gdh_8-gki_36-recP_12-spi_17-xpt_21-ddl_14	2414	Unknown/Novel	CC 4
GCA_901320185.1	aroE_2-gdh_5-gki_36-recP_12-spi_17-xpt_21-ddl_14	63	18052	CC 4
GCA_901320475.1	aroE_2-gdh_8-gki_36-recP_12-spi_17-xpt_21-ddl_14	2414	Unknown/Novel	CC 4
GCA_901320855.1	aroE_2-gdh_5-gki_36-recP_1-spi_17-xpt_49-ddl_14	10967	14770	CC 4
GCA_901321435.1	aroE_2-gdh_5-gki_36-recP_12-spi_17-xpt_21-ddl_14	63	Unknown/Novel	CC 4
GCA_901321525.1	aroE_2-gdh_5-gki_36-recP_12-spi_17-xpt_21-ddl_5	782	28703	CC 4
GCA_901322505.1	aroE_2-gdh_5-gki_36-recP_12-spi_17-xpt_21-ddl_14	63	Unknown/Novel	CC 4
GCA_901322735.1	aroE_2-gdh_5-gki_36-recP_12-spi_17-xpt_386-ddl_14	5285	Unknown/Novel	CC 4
GCA_901322745.1	aroE_2-gdh_5-gki_36-recP_12-spi_17-xpt_386-ddl_14	5285	28752	CC 4
GCA_901322775.1	aroE_2-gdh_5-gki_36-recP_12-spi_17-xpt_21-ddl_14	63	Unknown/Novel	CC 4
GCA_901322825.1	aroE_2-gdh_5-gki_36-recP_12-spi_17-xpt_386-ddl_14	5285	28751	CC 4
GCA_901323285.1	aroE_2-gdh_5-gki_36-recP_12-spi_17-xpt_21-ddl_14	63	28642	CC 4
GCA_901323465.1	aroE_2-gdh_5-gki_36-recP_12-spi_17-xpt_386-ddl_14	5285	Unknown/Novel	CC 4
GCA_901323525.1	aroE_2-gdh_5-gki_36-recP_12-spi_17-xpt_21-ddl_14	63	Unknown/Novel	CC 4
GCA_901324085.1	aroE_2-gdh_5-gki_36-recP_12-spi_17-xpt_21-ddl_126	6043	28764	CC 4
GCA_901324895.1	aroE_2-gdh_5-gki_36-recP_12-spi_17-xpt_21-ddl_126	6043	28763	CC 4
GCA_901325465.1	aroE_2-gdh_5-gki_36-recP_12-spi_17-xpt_21-ddl_126	6043	Unknown/Novel	CC 4
GCA_901325535.1	aroE_2-gdh_5-gki_36-recP_12-spi_17-xpt_21-ddl_14	63	14878	CC 4
GCA_901325935.1	aroE_2-gdh_5-gki_36-recP_12-spi_17-xpt_21-ddl_126	6043	Unknown/Novel	CC 4
GCA_901326015.1	aroE_2-gdh_5-gki_36-recP_12-spi_17-xpt_21-ddl_126	6043	Unknown/Novel	CC 4
GCA_901326265.1	aroE_2-gdh_5-gki_36-recP_28-spi_17-xpt_49-ddl_14	4040	14541	CC 4
GCA_901326285.1	aroE_2-gdh_8-gki_36-recP_12-spi_17-xpt_21-ddl_14	2414	19360	CC 4
GCA_901326355.1	aroE_2-gdh_5-gki_36-recP_12-spi_17-xpt_21-ddl_14	63	28698	CC 4
GCA_901326625.1	aroE_2-gdh_5-gki_36-recP_12-spi_17-xpt_21-ddl_14	63	14956	CC 4
GCA_901326845.1	aroE_2-gdh_5-gki_36-recP_12-spi_17-xpt_21-ddl_14	63	28710	CC 4
GCA_901327445.1	aroE_2-gdh_5-gki_36-recP_5-spi_17-xpt_21-ddl_14	5187	Unknown/Novel	CC 4
GCA_901327535.1	aroE_2-gdh_5-gki_36-recP_12-spi_17-xpt_21-ddl_14	63	14914	CC 4
GCA_901328105.1	aroE_2-gdh_5-gki_36-recP_12-spi_17-xpt_21-ddl_14	63	Unknown/Novel	CC 4
GCA_901328555.1	aroE_2-gdh_5-gki_36-recP_12-spi_17-xpt_21-ddl_14	63	28664	CC 4
GCA_901329295.1	aroE_2-gdh_5-gki_36-recP_12-spi_17-xpt_21-ddl_126	6043	28759	CC 4
GCA_901329325.1	aroE_2-gdh_5-gki_36-recP_12-spi_17-xpt_21-ddl_14	63	33934	CC 4
GCA_901329505.1	aroE_2-gdh_5-gki_4-recP_12-spi_17-xpt_3-ddl_14	11399	Unknown/Novel	CC 4
GCA_901329565.1	aroE_2-gdh_5-gki_36-recP_12-spi_17-xpt_21-ddl_126	6043	Unknown/Novel	CC 4
GCA_901329905.1	aroE_2-gdh_5-gki_36-recP_12-spi_17-xpt_21-ddl_14	63	28631	CC 4
GCA_901329955.1	aroE_2-gdh_5-gki_36-recP_12-spi_17-xpt_21-ddl_126	6043	Unknown/Novel	CC 4
GCA_901330125.1	aroE_2-gdh_5-gki_36-recP_12-spi_17-xpt_21-ddl_126	6043	Unknown/Novel	CC 4
GCA_901330225.1	aroE_2-gdh_5-gki_36-recP_12-spi_17-xpt_21-ddl_126	6043	28755	CC 4
GCA_901330705.1	aroE_2-gdh_5-gki_36-recP_5-spi_17-xpt_21-ddl_14	5187	28739	CC 4
GCA_901330995.1	aroE_2-gdh_5-gki_36-recP_12-spi_17-xpt_21-ddl_14	63	28618	CC 4
GCA_901331255.1	aroE_2-gdh_8-gki_4-recP_18-spi_17-xpt_21-ddl_14	4902	Unknown/Novel	CC 4
GCA_901333365.1	aroE_2-gdh_5-gki_36-recP_12-spi_17-xpt_21-ddl_14	63	Unknown/Novel	CC 4
GCA_901334145.1	aroE_2-gdh_5-gki_36-recP_12-spi_17-xpt_26-ddl_14	3816	28730	CC 4
GCA_901334445.1	aroE_2-gdh_5-gki_36-recP_12-spi_17-xpt_21-ddl_14	63	55667	CC 4
GCA_901334935.1	aroE_2-gdh_5-gki_36-recP_12-spi_17-xpt_21-ddl_14	63	28620	CC 4
GCA_901335915.1	aroE_2-gdh_5-gki_36-recP_12-spi_9-xpt_21-ddl_14	2447	Unknown/Novel	CC 4
GCA_901336095.1	aroE_2-gdh_5-gki_36-recP_12-spi_17-xpt_21-ddl_14	63	28617	CC 4
GCA_901336135.1	aroE_2-gdh_8-gki_4-recP_18-spi_17-xpt_21-ddl_14	4902	28736	CC 4
GCA_901336375.1	aroE_2-gdh_5-gki_36-recP_28-spi_17-xpt_49-ddl_14	4040	28731	CC 4
GCA_901336455.1	aroE_2-gdh_5-gki_36-recP_12-spi_9-xpt_21-ddl_14	2447	Unknown/Novel	CC 4
GCA_901336755.1	aroE_2-gdh_5-gki_36-recP_12-spi_17-xpt_21-ddl_14	63	28616	CC 4
GCA_901337715.1	aroE_2-gdh_5-gki_36-recP_12-spi_17-xpt_21-ddl_14	63	Unknown/Novel	CC 4
GCA_901337985.1	aroE_2-gdh_8-gki_4-recP_18-spi_17-xpt_21-ddl_14	4902	Unknown/Novel	CC 4
GCA_901338105.1	aroE_2-gdh_8-gki_4-recP_18-spi_17-xpt_21-ddl_14	4902	28734	CC 4
GCA_901339715.1	aroE_2-gdh_5-gki_36-recP_12-spi_17-xpt_21-ddl_14	63	Unknown/Novel	CC 4
GCA_901340385.1	aroE_2-gdh_5-gki_36-recP_12-spi_17-xpt_21-ddl_14	63	Unknown/Novel	CC 4
GCA_901342655.1	aroE_2-gdh_5-gki_36-recP_12-spi_17-xpt_21-ddl_14	63	Unknown/Novel	CC 4
GCA_901342795.1	aroE_2-gdh_5-gki_36-recP_12-spi_17-xpt_21-ddl_14	63	Unknown/Novel	CC 4
GCA_901342865.1	aroE_2-gdh_5-gki_36-recP_12-spi_17-xpt_21-ddl_14	63	Unknown/Novel	CC 4
GCA_000018985.1	aroE_2-gdh_8-gki_2-recP_4-spi_6-xpt_1-ddl_1	66	18	CC 23
GCA_001095105.2	aroE_2-gdh_8-gki_2-recP_4-spi_6-xpt_1-ddl_1	66	2761	CC 23
GCA_001128465.1	aroE_2-gdh_13-gki_2-recP_4-spi_17-xpt_1-ddl_1	7180	Unknown/Novel	CC 23
GCA_001162525.1	aroE_2-gdh_13-gki_2-recP_4-spi_6-xpt_1-ddl_1	71	Unknown/Novel	CC 23
GCA_001169025.2	aroE_2-gdh_8-gki_2-recP_4-spi_6-xpt_1-ddl_1	66	Unknown/Novel	CC 23
GCA_019446835.1	aroE_2-gdh_8-gki_2-recP_4-spi_6-xpt_1-ddl_1	66	Unknown/Novel	CC 23
GCA_019457055.1	aroE_2-gdh_8-gki_2-recP_4-spi_6-xpt_1-ddl_1	66	Unknown/Novel	CC 23
GCA_019457075.1	aroE_2-gdh_8-gki_2-recP_4-spi_6-xpt_1-ddl_1	66	Unknown/Novel	CC 23
GCA_019457255.1	aroE_2-gdh_13-gki_2-recP_4-spi_9-xpt_4-ddl_1	72	Unknown/Novel	CC 23
GCA_900017815.1	aroE_2-gdh_8-gki_2-recP_4-spi_6-xpt_1-ddl_1	66	Unknown/Novel	CC 23
GCA_900018405.1	aroE_2-gdh_8-gki_2-recP_4-spi_6-xpt_1-ddl_1	66	Unknown/Novel	CC 23
GCA_900018515.1	aroE_2-gdh_8-gki_2-recP_4-spi_6-xpt_1-ddl_1	66	17559	CC 23
GCA_900018565.1	aroE_2-gdh_8-gki_2-recP_4-spi_6-xpt_1-ddl_1	66	Unknown/Novel	CC 23
GCA_900019425.1	aroE_2-gdh_8-gki_2-recP_4-spi_6-xpt_1-ddl_1	66	Unknown/Novel	CC 23
GCA_900019465.1	aroE_2-gdh_8-gki_2-recP_4-spi_6-xpt_1-ddl_1	66	17449	CC 23
GCA_900020995.1	aroE_2-gdh_8-gki_2-recP_4-spi_6-xpt_1-ddl_1	66	17298	CC 23
GCA_900022185.1	aroE_2-gdh_8-gki_2-recP_4-spi_6-xpt_1-ddl_1	66	29390	CC 23
GCA_900022745.1	aroE_2-gdh_8-gki_7-recP_4-spi_6-xpt_1-ddl_1	67	17455	CC 23
GCA_900022875.1	aroE_2-gdh_13-gki_2-recP_4-spi_9-xpt_4-ddl_1	72	Unknown/Novel	CC 23
GCA_900023515.1	aroE_2-gdh_8-gki_2-recP_4-spi_6-xpt_1-ddl_1	66	Unknown/Novel	CC 23
GCA_900024035.1	aroE_2-gdh_8-gki_2-recP_4-spi_6-xpt_1-ddl_1	66	Unknown/Novel	CC 23
GCA_900024105.1	aroE_2-gdh_8-gki_2-recP_4-spi_6-xpt_1-ddl_1	66	17219	CC 23
GCA_900024225.1	aroE_2-gdh_8-gki_2-recP_4-spi_6-xpt_1-ddl_1	66	Unknown/Novel	CC 23
GCA_900024695.1	aroE_2-gdh_13-gki_2-recP_4-spi_9-xpt_4-ddl_1	72	17956	CC 23
GCA_900024775.1	aroE_2-gdh_8-gki_2-recP_4-spi_6-xpt_1-ddl_1	66	29424	CC 23
GCA_900024875.1	aroE_2-gdh_5-gki_2-recP_4-spi_6-xpt_1-ddl_1	517	Unknown/Novel	CC 23
GCA_900025105.1	aroE_2-gdh_13-gki_2-recP_4-spi_9-xpt_4-ddl_1	72	17029	CC 23
GCA_900025335.1	aroE_2-gdh_8-gki_2-recP_4-spi_6-xpt_1-ddl_1	66	Unknown/Novel	CC 23
GCA_900025365.1	aroE_2-gdh_8-gki_2-recP_4-spi_6-xpt_1-ddl_1	66	29635	CC 23
GCA_900025425.1	aroE_2-gdh_13-gki_2-recP_4-spi_9-xpt_4-ddl_1	72	Unknown/Novel	CC 23
GCA_900026325.1	aroE_2-gdh_13-gki_2-recP_4-spi_9-xpt_4-ddl_1	72	29417	CC 23
GCA_900026485.1	aroE_2-gdh_8-gki_2-recP_4-spi_6-xpt_1-ddl_1	66	17298	CC 23
GCA_900026515.1	aroE_2-gdh_13-gki_2-recP_4-spi_9-xpt_4-ddl_1	72	17400	CC 23
GCA_900026525.1	aroE_2-gdh_8-gki_2-recP_4-spi_6-xpt_1-ddl_1	66	17592	CC 23
GCA_900026595.1	aroE_2-gdh_8-gki_2-recP_4-spi_6-xpt_1-ddl_1	66	29390	CC 23
GCA_900026705.1	aroE_2-gdh_8-gki_7-recP_4-spi_6-xpt_1-ddl_1	67	29687	CC 23
GCA_900027515.1	aroE_2-gdh_8-gki_2-recP_5-spi_6-xpt_1-ddl_1	8000	17162	CC 23
GCA_900027555.1	aroE_2-gdh_13-gki_2-recP_4-spi_9-xpt_4-ddl_1	72	Unknown/Novel	CC 23
GCA_900027695.1	aroE_2-gdh_8-gki_7-recP_4-spi_6-xpt_1-ddl_1	67	Unknown/Novel	CC 23
GCA_900027775.1	aroE_2-gdh_8-gki_2-recP_4-spi_6-xpt_1-ddl_1	66	Unknown/Novel	CC 23
GCA_900028625.1	aroE_2-gdh_8-gki_2-recP_4-spi_6-xpt_1-ddl_1	66	Unknown/Novel	CC 23
GCA_900029655.1	aroE_2-gdh_13-gki_2-recP_4-spi_9-xpt_4-ddl_1	72	17032	CC 23
GCA_900030005.1	aroE_2-gdh_8-gki_2-recP_4-spi_6-xpt_1-ddl_1	66	17334	CC 23
GCA_900030075.1	aroE_2-gdh_13-gki_2-recP_4-spi_9-xpt_4-ddl_1	72	29186	CC 23
GCA_900030545.1	aroE_2-gdh_8-gki_2-recP_4-spi_6-xpt_1-ddl_1	66	29635	CC 23
GCA_900030635.1	aroE_2-gdh_8-gki_2-recP_4-spi_6-xpt_1-ddl_1	66	Unknown/Novel	CC 23
GCA_900030655.1	aroE_2-gdh_8-gki_2-recP_4-spi_6-xpt_1-ddl_1	66	Unknown/Novel	CC 23
GCA_900030725.1	aroE_2-gdh_13-gki_2-recP_4-spi_9-xpt_4-ddl_1	72	17255	CC 23
GCA_900031735.1	aroE_2-gdh_8-gki_2-recP_4-spi_6-xpt_1-ddl_1	66	Unknown/Novel	CC 23
GCA_900031785.1	aroE_2-gdh_5-gki_2-recP_4-spi_6-xpt_1-ddl_1	517	Unknown/Novel	CC 23
GCA_900032885.1	aroE_2-gdh_8-gki_2-recP_5-spi_6-xpt_1-ddl_1	8000	17162	CC 23
GCA_900034095.1	aroE_2-gdh_8-gki_2-recP_4-spi_6-xpt_1-ddl_1	66	Unknown/Novel	CC 23
GCA_900034505.1	aroE_2-gdh_13-gki_2-recP_4-spi_9-xpt_4-ddl_1	72	Unknown/Novel	CC 23
GCA_900041755.1	aroE_2-gdh_8-gki_7-recP_4-spi_6-xpt_1-ddl_1	67	17370	CC 23
GCA_900046635.1	aroE_2-gdh_13-gki_2-recP_4-spi_9-xpt_4-ddl_1	72	Unknown/Novel	CC 23
GCA_900053075.2	aroE_2-gdh_8-gki_2-recP_4-spi_6-xpt_75-ddl_1	632	28596	CC 23
GCA_900053505.2	aroE_2-gdh_8-gki_2-recP_4-spi_6-xpt_1-ddl_1	66	28564	CC 23
GCA_900053515.2	aroE_2-gdh_8-gki_2-recP_4-spi_6-xpt_1-ddl_1	66	28563	CC 23
GCA_900056345.1	aroE_2-gdh_8-gki_2-recP_4-spi_6-xpt_1-ddl_1	66	Unknown/Novel	CC 23
GCA_900060865.2	aroE_2-gdh_8-gki_2-recP_4-spi_6-xpt_1-ddl_1	66	28557	CC 23
GCA_900190845.1	aroE_2-gdh_8-gki_2-recP_4-spi_6-xpt_1-ddl_1	66	Unknown/Novel	CC 23
GCA_900191625.1	aroE_2-gdh_13-gki_2-recP_4-spi_9-xpt_4-ddl_1	72	Unknown/Novel	CC 23
GCA_900192445.1	aroE_2-gdh_8-gki_2-recP_4-spi_6-xpt_1-ddl_1	66	Unknown/Novel	CC 23
GCA_900192575.1	aroE_2-gdh_8-gki_2-recP_4-spi_6-xpt_1-ddl_1	66	Unknown/Novel	CC 23
GCA_900192905.1	aroE_2-gdh_13-gki_2-recP_15-spi_6-xpt_1-ddl_1	73	Unknown/Novel	CC 23
GCA_900194945.1	aroE_2-gdh_13-gki_2-recP_4-spi_9-xpt_4-ddl_1	72	9030	CC 23
GCA_900195065.1	aroE_2-gdh_13-gki_2-recP_4-spi_9-xpt_4-ddl_1	72	Unknown/Novel	CC 23
GCA_900459705.1	aroE_2-gdh_13-gki_2-recP_4-spi_6-xpt_1-ddl_1	71	Unknown/Novel	CC 23
GCA_901215945.1	aroE_2-gdh_8-gki_2-recP_4-spi_6-xpt_1-ddl_1	66	28565	CC 23
GCA_901216175.1	aroE_2-gdh_8-gki_2-recP_4-spi_6-xpt_1-ddl_1	66	Unknown/Novel	CC 23
GCA_901219895.1	aroE_2-gdh_5-gki_2-recP_4-spi_6-xpt_1-ddl_679	11683	15526	CC 23
GCA_901227405.1	aroE_2-gdh_8-gki_2-recP_4-spi_6-xpt_1-ddl_1	66	15733	CC 23
GCA_901230535.1	aroE_2-gdh_8-gki_7-recP_4-spi_6-xpt_1-ddl_1	67	28569	CC 23
GCA_901231375.1	aroE_2-gdh_8-gki_2-recP_4-spi_6-xpt_1-ddl_1	66	28559	CC 23
GCA_901231905.1	aroE_2-gdh_8-gki_2-recP_4-spi_6-xpt_1-ddl_14	738	28601	CC 23
GCA_901232185.1	aroE_2-gdh_5-gki_2-recP_4-spi_6-xpt_1-ddl_679	11683	16192	CC 23
GCA_901233015.1	aroE_2-gdh_13-gki_2-recP_15-spi_6-xpt_1-ddl_1	73	Unknown/Novel	CC 23
GCA_901234785.1	aroE_2-gdh_8-gki_2-recP_4-spi_6-xpt_1-ddl_1	66	Unknown/Novel	CC 23
GCA_901235935.1	aroE_2-gdh_8-gki_2-recP_4-spi_6-xpt_1-ddl_1	66	17914	CC 23
GCA_901238115.1	aroE_2-gdh_8-gki_2-recP_4-spi_6-xpt_1-ddl_1	66	28567	CC 23
GCA_901240105.1	aroE_2-gdh_8-gki_7-recP_4-spi_6-xpt_1-ddl_1	67	28570	CC 23
GCA_901240565.1	aroE_2-gdh_13-gki_2-recP_4-spi_9-xpt_1-ddl_1	9747	9161	CC 23
GCA_901242905.1	aroE_2-gdh_8-gki_2-recP_4-spi_6-xpt_75-ddl_1	632	Unknown/Novel	CC 23
GCA_901243945.1	aroE_2-gdh_8-gki_7-recP_4-spi_6-xpt_1-ddl_1	67	28571	CC 23
GCA_901244095.1	aroE_2-gdh_8-gki_2-recP_4-spi_6-xpt_1-ddl_1	66	Unknown/Novel	CC 23
GCA_901244885.1	aroE_2-gdh_5-gki_2-recP_4-spi_6-xpt_1-ddl_679	11683	Unknown/Novel	CC 23
GCA_901247935.1	aroE_2-gdh_8-gki_2-recP_4-spi_6-xpt_1-ddl_1	66	28555	CC 23
GCA_901248675.1	aroE_2-gdh_8-gki_2-recP_4-spi_6-xpt_1-ddl_1	66	Unknown/Novel	CC 23
GCA_901252125.1	aroE_2-gdh_8-gki_2-recP_4-spi_6-xpt_1-ddl_1	66	17678	CC 23
GCA_901253415.1	aroE_2-gdh_8-gki_2-recP_4-spi_6-xpt_75-ddl_1	632	28594	CC 23
GCA_901261785.1	aroE_2-gdh_8-gki_2-recP_4-spi_6-xpt_1-ddl_1	66	Unknown/Novel	CC 23
GCA_901265905.1	aroE_2-gdh_5-gki_2-recP_4-spi_6-xpt_1-ddl_679	11683	Unknown/Novel	CC 23
GCA_901265935.1	aroE_2-gdh_8-gki_2-recP_4-spi_6-xpt_1-ddl_1	66	28562	CC 23
GCA_901266135.1	aroE_2-gdh_8-gki_2-recP_4-spi_6-xpt_75-ddl_1	632	28595	CC 23
GCA_901270505.1	aroE_7-gdh_8-gki_2-recP_4-spi_6-xpt_1-ddl_1	9257	25415	CC 23
GCA_901276085.1	aroE_2-gdh_8-gki_2-recP_4-spi_6-xpt_1-ddl_1	66	28566	CC 23
GCA_901278075.1	aroE_2-gdh_5-gki_2-recP_4-spi_6-xpt_1-ddl_679	11683	28605	CC 23
GCA_901284165.1	aroE_2-gdh_8-gki_2-recP_4-spi_6-xpt_1-ddl_1	66	28556	CC 23
GCA_901286035.1	aroE_2-gdh_13-gki_2-recP_4-spi_6-xpt_1-ddl_1	71	28572	CC 23
GCA_901286905.1	aroE_2-gdh_13-gki_2-recP_4-spi_9-xpt_4-ddl_1	72	28573	CC 23
GCA_901290745.1	aroE_2-gdh_8-gki_2-recP_4-spi_6-xpt_1-ddl_815	12837	Unknown/Novel	CC 23
GCA_901291595.1	aroE_2-gdh_13-gki_2-recP_15-spi_6-xpt_1-ddl_1	73	28585	CC 23
GCA_901292325.1	aroE_2-gdh_8-gki_2-recP_4-spi_6-xpt_1-ddl_1	66	28548	CC 23
GCA_901292885.1	aroE_2-gdh_13-gki_2-recP_4-spi_9-xpt_4-ddl_1	72	28581	CC 23
GCA_901293055.1	aroE_2-gdh_8-gki_2-recP_4-spi_6-xpt_1-ddl_1	66	28541	CC 23
GCA_901293575.1	aroE_2-gdh_8-gki_2-recP_4-spi_6-xpt_1-ddl_1	66	28540	CC 23
GCA_901293835.1	aroE_2-gdh_5-gki_2-recP_4-spi_6-xpt_1-ddl_1	517	28591	CC 23
GCA_901294255.1	aroE_2-gdh_13-gki_2-recP_4-spi_9-xpt_4-ddl_1	72	28580	CC 23
GCA_901294415.1	aroE_2-gdh_8-gki_2-recP_4-spi_6-xpt_1-ddl_1	66	28539	CC 23
GCA_901296175.1	aroE_2-gdh_13-gki_2-recP_4-spi_9-xpt_4-ddl_1	72	28579	CC 23
GCA_901296585.1	aroE_2-gdh_8-gki_2-recP_4-spi_6-xpt_1-ddl_1	66	28538	CC 23
GCA_901297135.1	aroE_2-gdh_8-gki_2-recP_16-spi_6-xpt_1-ddl_1	737	28598	CC 23
GCA_901297835.1	aroE_2-gdh_5-gki_2-recP_4-spi_6-xpt_1-ddl_1	517	28592	CC 23
GCA_901298805.1	aroE_2-gdh_8-gki_2-recP_4-spi_6-xpt_1-ddl_1	66	28537	CC 23
GCA_901299085.1	aroE_2-gdh_8-gki_2-recP_4-spi_6-xpt_1-ddl_1	66	28536	CC 23
GCA_901300185.1	aroE_2-gdh_5-gki_2-recP_4-spi_6-xpt_1-ddl_679	11683	28604	CC 23
GCA_901300725.1	aroE_2-gdh_8-gki_2-recP_4-spi_6-xpt_1-ddl_1	66	28551	CC 23
GCA_901301205.1	aroE_2-gdh_136-gki_2-recP_15-spi_6-xpt_1-ddl_1	2216	28602	CC 23
GCA_901301315.1	aroE_2-gdh_13-gki_2-recP_15-spi_6-xpt_1-ddl_1	73	28584	CC 23
GCA_901304885.1	aroE_2-gdh_5-gki_2-recP_4-spi_6-xpt_1-ddl_1	517	28589	CC 23
GCA_901305195.1	aroE_2-gdh_5-gki_4-recP_4-spi_6-xpt_1-ddl_1	12487	28607	CC 23
GCA_901305725.1	aroE_2-gdh_13-gki_2-recP_4-spi_600-xpt_4-ddl_1	13939	28610	CC 23
GCA_901306565.1	aroE_2-gdh_8-gki_2-recP_4-spi_6-xpt_1-ddl_1	66	28552	CC 23
GCA_901307625.1	aroE_2-gdh_13-gki_2-recP_4-spi_9-xpt_742-ddl_1	12840	28609	CC 23
GCA_901308135.1	aroE_2-gdh_5-gki_2-recP_4-spi_6-xpt_1-ddl_5	8809	28603	CC 23
GCA_901308445.1	aroE_2-gdh_8-gki_2-recP_4-spi_6-xpt_1-ddl_1	66	28550	CC 23
GCA_901308495.1	aroE_2-gdh_8-gki_2-recP_4-spi_6-xpt_1-ddl_1	66	28549	CC 23
GCA_901308735.1	aroE_2-gdh_8-gki_2-recP_4-spi_6-xpt_75-ddl_1	632	Unknown/Novel	CC 23
GCA_901309605.1	aroE_2-gdh_8-gki_2-recP_16-spi_6-xpt_1-ddl_1	737	28600	CC 23
GCA_901309955.1	aroE_2-gdh_13-gki_2-recP_4-spi_9-xpt_4-ddl_1	72	28577	CC 23
GCA_901310475.1	aroE_2-gdh_8-gki_2-recP_4-spi_6-xpt_1-ddl_1	66	Unknown/Novel	CC 23
GCA_901310605.1	aroE_2-gdh_8-gki_7-recP_4-spi_6-xpt_1-ddl_1	67	28568	CC 23
GCA_901312035.1	aroE_2-gdh_8-gki_2-recP_4-spi_6-xpt_1-ddl_1	66	28547	CC 23
GCA_901312285.1	aroE_2-gdh_8-gki_2-recP_4-spi_6-xpt_1-ddl_1	66	28546	CC 23
GCA_901314045.1	aroE_2-gdh_8-gki_2-recP_4-spi_6-xpt_1-ddl_1	66	28545	CC 23
GCA_901314945.1	aroE_2-gdh_5-gki_4-recP_4-spi_6-xpt_1-ddl_1	12487	28606	CC 23
GCA_901321665.1	aroE_2-gdh_13-gki_2-recP_4-spi_9-xpt_4-ddl_1	72	Unknown/Novel	CC 23
GCA_901328075.1	aroE_2-gdh_8-gki_2-recP_4-spi_6-xpt_1-ddl_1	66	9144	CC 23
GCA_901328895.1	aroE_2-gdh_8-gki_2-recP_4-spi_6-xpt_1-ddl_1	66	28544	CC 23
GCA_901329345.1	aroE_2-gdh_13-gki_2-recP_4-spi_9-xpt_4-ddl_1	72	28576	CC 23
GCA_901329765.1	aroE_2-gdh_8-gki_2-recP_16-spi_6-xpt_1-ddl_1	737	28599	CC 23
GCA_901330095.1	aroE_2-gdh_8-gki_2-recP_4-spi_6-xpt_1-ddl_1	66	28543	CC 23
GCA_901330735.1	aroE_2-gdh_13-gki_2-recP_4-spi_9-xpt_4-ddl_1	72	28575	CC 23
GCA_901331855.1	aroE_2-gdh_8-gki_2-recP_4-spi_6-xpt_1-ddl_1	66	28542	CC 23
GCA_901332965.1	aroE_2-gdh_13-gki_2-recP_15-spi_6-xpt_1-ddl_1	73	28583	CC 23
GCA_901333335.1	aroE_2-gdh_5-gki_2-recP_4-spi_6-xpt_1-ddl_1	517	28590	CC 23
GCA_901334735.1	aroE_2-gdh_5-gki_2-recP_4-spi_6-xpt_1-ddl_1	517	28588	CC 23
GCA_901335405.1	aroE_2-gdh_13-gki_2-recP_4-spi_9-xpt_4-ddl_1	72	28578	CC 23
GCA_901335555.1	aroE_2-gdh_8-gki_2-recP_4-spi_6-xpt_1-ddl_1	66	28535	CC 23
GCA_901337995.1	aroE_2-gdh_8-gki_2-recP_4-spi_6-xpt_1-ddl_1	66	28608	CC 23
GCA_901340215.1	aroE_2-gdh_13-gki_2-recP_15-spi_6-xpt_1-ddl_1	73	9115	CC 23
GCA_901341445.1	aroE_2-gdh_13-gki_2-recP_4-spi_9-xpt_4-ddl_1	72	28574	CC 23
GCA_000026665.1	aroE_4-gdh_4-gki_2-recP_4-spi_4-xpt_1-ddl_1	81	6433	CC 36
GCA_000232385.2	aroE_4-gdh_4-gki_2-recP_4-spi_4-xpt_1-ddl_1	81	6507	CC 36
GCA_000232425.2	aroE_4-gdh_4-gki_2-recP_4-spi_4-xpt_1-ddl_1	81	6513	CC 36
GCA_000232505.2	aroE_4-gdh_4-gki_2-recP_4-spi_4-xpt_1-ddl_1	81	Unknown/Novel	CC 36
GCA_000232865.2	aroE_4-gdh_4-gki_2-recP_4-spi_4-xpt_1-ddl_1	81	Unknown/Novel	CC 36
GCA_000251445.2	aroE_4-gdh_4-gki_2-recP_4-spi_4-xpt_85-ddl_1	634	Unknown/Novel	CC 36
GCA_000256645.1	aroE_4-gdh_4-gki_2-recP_4-spi_4-xpt_1-ddl_1	81	7358	CC 36
GCA_000256665.1	aroE_4-gdh_4-gki_2-recP_4-spi_4-xpt_1-ddl_1	81	7359	CC 36
GCA_000430325.1	aroE_4-gdh_4-gki_2-recP_4-spi_4-xpt_1-ddl_1	81	Unknown/Novel	CC 36
GCA_001086045.1	aroE_4-gdh_4-gki_2-recP_4-spi_4-xpt_1-ddl_1	81	Unknown/Novel	CC 36
GCA_001088945.1	aroE_4-gdh_4-gki_2-recP_4-spi_4-xpt_1-ddl_1	81	1899	CC 36
GCA_001091625.1	aroE_4-gdh_4-gki_2-recP_4-spi_4-xpt_1-ddl_1	81	1834	CC 36
GCA_001093485.1	aroE_4-gdh_4-gki_2-recP_4-spi_4-xpt_1-ddl_1	81	1858	CC 36
GCA_001095185.1	aroE_4-gdh_4-gki_2-recP_4-spi_4-xpt_1-ddl_1	81	1848	CC 36
GCA_001107465.1	aroE_4-gdh_4-gki_2-recP_4-spi_4-xpt_1-ddl_1	81	1866	CC 36
GCA_001113625.1	aroE_4-gdh_4-gki_2-recP_4-spi_4-xpt_1-ddl_1	81	1718	CC 36
GCA_001116425.2	aroE_4-gdh_4-gki_2-recP_4-spi_4-xpt_1-ddl_1	81	2580	CC 36
GCA_001116845.1	aroE_4-gdh_4-gki_2-recP_4-spi_4-xpt_1-ddl_1	81	1818	CC 36
GCA_001127025.1	aroE_4-gdh_4-gki_2-recP_4-spi_4-xpt_1-ddl_1	81	1820	CC 36
GCA_001127265.1	aroE_4-gdh_4-gki_2-recP_4-spi_4-xpt_1-ddl_1	81	1689	CC 36
GCA_001135325.2	aroE_4-gdh_4-gki_2-recP_4-spi_4-xpt_1-ddl_1	81	2581	CC 36
GCA_001140545.1	aroE_4-gdh_4-gki_2-recP_4-spi_4-xpt_1-ddl_1	81	1909	CC 36
GCA_001144825.1	aroE_4-gdh_4-gki_2-recP_4-spi_4-xpt_1-ddl_1	81	1913	CC 36
GCA_001152265.2	aroE_4-gdh_4-gki_2-recP_4-spi_4-xpt_1-ddl_1	81	Unknown/Novel	CC 36
GCA_001157265.1	aroE_4-gdh_4-gki_2-recP_4-spi_4-xpt_1-ddl_1	81	1907	CC 36
GCA_001161065.1	aroE_4-gdh_4-gki_2-recP_4-spi_4-xpt_1-ddl_1	81	1795	CC 36
GCA_001166145.1	aroE_4-gdh_4-gki_2-recP_4-spi_4-xpt_1-ddl_1	81	1809	CC 36
GCA_001169985.1	aroE_4-gdh_4-gki_2-recP_4-spi_4-xpt_1-ddl_1	81	1688	CC 36
GCA_001197415.1	aroE_4-gdh_4-gki_2-recP_4-spi_4-xpt_1-ddl_1	81	1761	CC 36
GCA_001201515.1	aroE_4-gdh_4-gki_2-recP_4-spi_4-xpt_1-ddl_1	81	1745	CC 36
GCA_001203615.1	aroE_4-gdh_4-gki_2-recP_4-spi_4-xpt_1-ddl_1	81	1709	CC 36
GCA_001335075.1	aroE_4-gdh_4-gki_2-recP_4-spi_4-xpt_1-ddl_1	81	1564	CC 36
GCA_001335275.1	aroE_4-gdh_4-gki_2-recP_4-spi_4-xpt_1-ddl_1	81	1682	CC 36
GCA_001337675.1	aroE_4-gdh_4-gki_2-recP_4-spi_4-xpt_1-ddl_1	81	5778	CC 36
GCA_001338095.1	aroE_4-gdh_4-gki_2-recP_4-spi_4-xpt_1-ddl_1	81	1728	CC 36
GCA_001339735.1	aroE_4-gdh_4-gki_2-recP_4-spi_4-xpt_1-ddl_1	81	1703	CC 36
GCA_001341335.1	aroE_4-gdh_4-gki_2-recP_4-spi_4-xpt_1-ddl_1	81	1751	CC 36
GCA_001342015.1	aroE_4-gdh_4-gki_2-recP_4-spi_4-xpt_1-ddl_1	81	1596	CC 36
GCA_001342355.1	aroE_4-gdh_4-gki_2-recP_4-spi_4-xpt_1-ddl_1	81	1759	CC 36
GCA_001347335.1	aroE_4-gdh_4-gki_2-recP_4-spi_4-xpt_1-ddl_1	81	1880	CC 36
GCA_001348215.1	aroE_4-gdh_4-gki_2-recP_4-spi_4-xpt_1-ddl_1	81	Unknown/Novel	CC 36
GCA_001637415.1	aroE_4-gdh_4-gki_2-recP_4-spi_4-xpt_1-ddl_1	81	Unknown/Novel	CC 36
GCA_002947575.1	aroE_4-gdh_4-gki_2-recP_4-spi_4-xpt_1-ddl_1	81	6433	CC 36
GCA_003492585.1	aroE_4-gdh_4-gki_2-recP_4-spi_4-xpt_1-ddl_1	81	Unknown/Novel	CC 36
GCA_019399275.1	aroE_4-gdh_4-gki_2-recP_4-spi_4-xpt_1-ddl_1	81	Unknown/Novel	CC 36
GCA_900057355.2	aroE_4-gdh_4-gki_2-recP_5-spi_4-xpt_1-ddl_1	2346	28455	CC 36
GCA_900061255.2	aroE_4-gdh_4-gki_2-recP_5-spi_4-xpt_1-ddl_1	2346	28452	CC 36
GCA_900191905.1	aroE_4-gdh_4-gki_2-recP_4-spi_4-xpt_1-ddl_1	81	Unknown/Novel	CC 36
GCA_900194665.1	aroE_4-gdh_4-gki_113-recP_4-spi_4-xpt_1-ddl_1	1591	Unknown/Novel	CC 36
GCA_901213635.1	aroE_4-gdh_4-gki_2-recP_4-spi_4-xpt_1-ddl_1	81	28431	CC 36
GCA_901214365.1	aroE_4-gdh_4-gki_2-recP_4-spi_4-xpt_1-ddl_1	81	31481	CC 36
GCA_901214475.1	aroE_4-gdh_4-gki_2-recP_4-spi_4-xpt_1-ddl_1	81	Unknown/Novel	CC 36
GCA_901214905.1	aroE_4-gdh_4-gki_113-recP_4-spi_4-xpt_1-ddl_1	1591	Unknown/Novel	CC 36
GCA_901215295.1	aroE_4-gdh_4-gki_2-recP_4-spi_4-xpt_1-ddl_1	81	Unknown/Novel	CC 36
GCA_901215305.1	aroE_4-gdh_4-gki_2-recP_4-spi_4-xpt_1-ddl_1	81	31494	CC 36
GCA_901215345.1	aroE_4-gdh_4-gki_2-recP_4-spi_4-xpt_1-ddl_1	81	Unknown/Novel	CC 36
GCA_901215955.1	aroE_4-gdh_4-gki_2-recP_4-spi_4-xpt_1-ddl_1	81	Unknown/Novel	CC 36
GCA_901216075.1	aroE_4-gdh_4-gki_2-recP_4-spi_4-xpt_1-ddl_1	81	28425	CC 36
GCA_901216185.1	aroE_4-gdh_4-gki_2-recP_4-spi_4-xpt_1-ddl_1	81	Unknown/Novel	CC 36
GCA_901216245.1	aroE_4-gdh_4-gki_2-recP_4-spi_4-xpt_1-ddl_1	81	28423	CC 36
GCA_901216705.1	aroE_4-gdh_4-gki_2-recP_4-spi_4-xpt_1-ddl_1	81	Unknown/Novel	CC 36
GCA_901216745.1	aroE_4-gdh_4-gki_2-recP_4-spi_4-xpt_1-ddl_1	81	Unknown/Novel	CC 36
GCA_901217715.1	aroE_4-gdh_4-gki_2-recP_4-spi_4-xpt_1-ddl_1	81	28421	CC 36
GCA_901217805.1	aroE_4-gdh_4-gki_2-recP_4-spi_4-xpt_1-ddl_1	81	28420	CC 36
GCA_901218205.1	aroE_4-gdh_4-gki_2-recP_4-spi_4-xpt_1-ddl_1	81	28419	CC 36
GCA_901219635.1	aroE_4-gdh_4-gki_2-recP_4-spi_4-xpt_1-ddl_1	81	28437	CC 36
GCA_901224575.1	aroE_4-gdh_4-gki_2-recP_4-spi_4-xpt_1-ddl_1	81	28415	CC 36
GCA_901226655.1	aroE_4-gdh_4-gki_2-recP_4-spi_4-xpt_1-ddl_1	81	Unknown/Novel	CC 36
GCA_901230795.1	aroE_4-gdh_4-gki_427-recP_4-spi_4-xpt_1-ddl_1	9905	28500	CC 36
GCA_901231715.1	aroE_30-gdh_4-gki_2-recP_4-spi_4-xpt_1-ddl_1	282	16803	CC 36
GCA_901232195.1	aroE_4-gdh_4-gki_2-recP_4-spi_4-xpt_1-ddl_1	81	28417	CC 36
GCA_901232625.1	aroE_4-gdh_4-gki_2-recP_4-spi_4-xpt_1-ddl_1	81	Unknown/Novel	CC 36
GCA_901233435.1	aroE_4-gdh_4-gki_2-recP_5-spi_4-xpt_1-ddl_1	2346	Unknown/Novel	CC 36
GCA_901234465.1	aroE_4-gdh_4-gki_2-recP_4-spi_4-xpt_1-ddl_1	81	28443	CC 36
GCA_901235465.1	aroE_4-gdh_4-gki_2-recP_4-spi_4-xpt_1-ddl_1	81	Unknown/Novel	CC 36
GCA_901236425.1	aroE_4-gdh_4-gki_2-recP_4-spi_4-xpt_1-ddl_1	81	Unknown/Novel	CC 36
GCA_901240195.1	aroE_4-gdh_4-gki_2-recP_4-spi_4-xpt_1-ddl_1	81	28434	CC 36
GCA_901240965.1	aroE_4-gdh_4-gki_2-recP_4-spi_4-xpt_1-ddl_1	81	28433	CC 36
GCA_901242255.1	aroE_4-gdh_4-gki_2-recP_4-spi_4-xpt_1-ddl_1	81	28432	CC 36
GCA_901242915.1	aroE_4-gdh_4-gki_2-recP_4-spi_4-xpt_1-ddl_6	10869	16828	CC 36
GCA_901243445.1	aroE_4-gdh_4-gki_2-recP_4-spi_4-xpt_1-ddl_1	81	28442	CC 36
GCA_901243605.1	aroE_4-gdh_4-gki_2-recP_4-spi_4-xpt_1-ddl_1	81	Unknown/Novel	CC 36
GCA_901245915.1	aroE_4-gdh_4-gki_2-recP_4-spi_4-xpt_1-ddl_1	81	15617	CC 36
GCA_901248815.1	aroE_4-gdh_4-gki_2-recP_4-spi_4-xpt_1-ddl_1	81	Unknown/Novel	CC 36
GCA_901249165.1	aroE_4-gdh_4-gki_2-recP_4-spi_4-xpt_1-ddl_1	81	28716	CC 36
GCA_901251305.1	aroE_4-gdh_4-gki_2-recP_4-spi_4-xpt_1-ddl_1	81	28416	CC 36
GCA_901252795.1	aroE_4-gdh_4-gki_2-recP_4-spi_4-xpt_1-ddl_1	81	28441	CC 36
GCA_901253735.1	aroE_4-gdh_4-gki_2-recP_4-spi_4-xpt_1-ddl_1	81	Unknown/Novel	CC 36
GCA_901253855.1	aroE_4-gdh_4-gki_2-recP_4-spi_4-xpt_1-ddl_1	81	Unknown/Novel	CC 36
GCA_901255365.1	aroE_4-gdh_4-gki_2-recP_4-spi_4-xpt_1-ddl_1	81	28587	CC 36
GCA_901255495.1	aroE_4-gdh_4-gki_2-recP_4-spi_312-xpt_1-ddl_1	9904	Unknown/Novel	CC 36
GCA_901256165.1	aroE_4-gdh_4-gki_2-recP_4-spi_4-xpt_1-ddl_1	81	28414	CC 36
GCA_901256375.1	aroE_4-gdh_4-gki_2-recP_4-spi_4-xpt_1-ddl_1	81	28413	CC 36
GCA_901261505.1	aroE_4-gdh_4-gki_2-recP_4-spi_4-xpt_1-ddl_1	81	Unknown/Novel	CC 36
GCA_901262735.1	aroE_4-gdh_4-gki_2-recP_4-spi_4-xpt_1-ddl_1	81	28412	CC 36
GCA_901263425.1	aroE_4-gdh_4-gki_2-recP_4-spi_4-xpt_1-ddl_1	81	28411	CC 36
GCA_901265085.1	aroE_4-gdh_4-gki_2-recP_4-spi_4-xpt_1-ddl_1	81	28410	CC 36
GCA_901265475.1	aroE_4-gdh_4-gki_2-recP_4-spi_4-xpt_1-ddl_1	81	28440	CC 36
GCA_901266745.1	aroE_4-gdh_4-gki_2-recP_4-spi_4-xpt_1-ddl_1	81	28481	CC 36
GCA_901272905.1	aroE_4-gdh_4-gki_2-recP_4-spi_4-xpt_1-ddl_1	81	28439	CC 36
GCA_901275035.1	aroE_4-gdh_4-gki_2-recP_4-spi_4-xpt_1-ddl_1	81	Unknown/Novel	CC 36
GCA_901278905.1	aroE_4-gdh_4-gki_2-recP_4-spi_4-xpt_1-ddl_1	81	28408	CC 36
GCA_901279735.1	aroE_4-gdh_4-gki_2-recP_4-spi_4-xpt_1-ddl_437	6216	Unknown/Novel	CC 36
GCA_901285605.1	aroE_4-gdh_4-gki_2-recP_4-spi_4-xpt_1-ddl_1	81	28491	CC 36
GCA_901285655.1	aroE_4-gdh_4-gki_2-recP_4-spi_4-xpt_1-ddl_1	81	28490	CC 36
GCA_901285665.1	aroE_4-gdh_4-gki_2-recP_4-spi_4-xpt_1-ddl_1	81	28471	CC 36
GCA_901286945.1	aroE_4-gdh_4-gki_2-recP_4-spi_4-xpt_1-ddl_1	81	28478	CC 36
GCA_901287025.1	aroE_4-gdh_4-gki_2-recP_4-spi_4-xpt_1-ddl_1	81	28457	CC 36
GCA_901287405.1	aroE_4-gdh_4-gki_2-recP_4-spi_516-xpt_1-ddl_1	12173	28485	CC 36
GCA_901287415.1	aroE_4-gdh_4-gki_2-recP_4-spi_4-xpt_1-ddl_1	81	28477	CC 36
GCA_901287435.1	aroE_4-gdh_4-gki_2-recP_4-spi_4-xpt_1-ddl_1	81	28498	CC 36
GCA_901288695.1	aroE_4-gdh_4-gki_2-recP_4-spi_4-xpt_1-ddl_1	81	28380	CC 36
GCA_901288905.1	aroE_4-gdh_4-gki_2-recP_4-spi_4-xpt_1-ddl_1	81	28470	CC 36
GCA_901291665.1	aroE_4-gdh_4-gki_2-recP_4-spi_4-xpt_1-ddl_1	81	28391	CC 36
GCA_901291935.1	aroE_4-gdh_4-gki_2-recP_4-spi_4-xpt_1-ddl_1	81	28384	CC 36
GCA_901292545.1	aroE_4-gdh_4-gki_2-recP_4-spi_4-xpt_1-ddl_1	81	28395	CC 36
GCA_901292625.1	aroE_4-gdh_4-gki_2-recP_4-spi_4-xpt_1-ddl_1	81	28386	CC 36
GCA_901292915.1	aroE_4-gdh_4-gki_2-recP_4-spi_4-xpt_1-ddl_1	81	28381	CC 36
GCA_901293265.1	aroE_4-gdh_4-gki_2-recP_4-spi_4-xpt_1-ddl_1	81	28390	CC 36
GCA_901302425.1	aroE_4-gdh_4-gki_2-recP_4-spi_4-xpt_1-ddl_1	81	28489	CC 36
GCA_901302635.1	aroE_4-gdh_4-gki_2-recP_4-spi_4-xpt_1-ddl_1	81	28385	CC 36
GCA_901303055.1	aroE_4-gdh_4-gki_2-recP_4-spi_4-xpt_1-ddl_1	81	28488	CC 36
GCA_901303995.1	aroE_4-gdh_4-gki_2-recP_4-spi_4-xpt_1-ddl_1	81	28469	CC 36
GCA_901304595.1	aroE_4-gdh_4-gki_2-recP_4-spi_4-xpt_1-ddl_1	81	28468	CC 36
GCA_901305095.1	aroE_4-gdh_4-gki_2-recP_4-spi_4-xpt_1-ddl_1	81	28404	CC 36
GCA_901305255.1	aroE_4-gdh_4-gki_2-recP_4-spi_4-xpt_1-ddl_1	81	28467	CC 36
GCA_901305735.1	aroE_4-gdh_4-gki_2-recP_4-spi_4-xpt_1-ddl_1	81	28466	CC 36
GCA_901306795.1	aroE_4-gdh_4-gki_2-recP_4-spi_4-xpt_1-ddl_1	81	Unknown/Novel	CC 36
GCA_901307485.1	aroE_30-gdh_4-gki_2-recP_4-spi_4-xpt_1-ddl_1	282	28459	CC 36
GCA_901308455.1	aroE_4-gdh_4-gki_2-recP_4-spi_4-xpt_1-ddl_1	81	Unknown/Novel	CC 36
GCA_901309735.1	aroE_4-gdh_4-gki_2-recP_4-spi_4-xpt_1-ddl_1	81	28402	CC 36
GCA_901310835.1	aroE_4-gdh_4-gki_2-recP_4-spi_6-xpt_1-ddl_1	83	28458	CC 36
GCA_901311195.1	aroE_4-gdh_4-gki_2-recP_4-spi_4-xpt_1-ddl_1	81	28446	CC 36
GCA_901311575.1	aroE_4-gdh_4-gki_2-recP_4-spi_4-xpt_1-ddl_1	81	Unknown/Novel	CC 36
GCA_901311605.1	aroE_4-gdh_4-gki_2-recP_4-spi_4-xpt_1-ddl_1	81	28383	CC 36
GCA_901311665.1	aroE_4-gdh_4-gki_2-recP_4-spi_4-xpt_1-ddl_1	81	28398	CC 36
GCA_901312025.1	aroE_4-gdh_4-gki_2-recP_4-spi_4-xpt_1-ddl_1	81	28397	CC 36
GCA_901312245.1	aroE_4-gdh_4-gki_2-recP_4-spi_4-xpt_1-ddl_1	81	28396	CC 36
GCA_901312475.1	aroE_4-gdh_4-gki_2-recP_4-spi_4-xpt_1-ddl_1	81	28448	CC 36
GCA_901321965.1	aroE_4-gdh_4-gki_2-recP_4-spi_4-xpt_1-ddl_1	81	28407	CC 36
GCA_901322095.1	aroE_4-gdh_4-gki_2-recP_4-spi_4-xpt_1-ddl_1	81	Unknown/Novel	CC 36
GCA_901322125.1	aroE_4-gdh_4-gki_2-recP_4-spi_4-xpt_1-ddl_1	81	Unknown/Novel	CC 36
GCA_901322165.1	aroE_4-gdh_4-gki_2-recP_4-spi_4-xpt_1-ddl_1	81	28400	CC 36
GCA_901322215.1	aroE_4-gdh_200-gki_2-recP_4-spi_4-xpt_1-ddl_1	3800	Unknown/Novel	CC 36
GCA_901322905.1	aroE_4-gdh_4-gki_2-recP_5-spi_4-xpt_1-ddl_1	2346	Unknown/Novel	CC 36
GCA_901327815.1	aroE_4-gdh_4-gki_2-recP_4-spi_4-xpt_1-ddl_1	81	28487	CC 36
GCA_901327895.1	aroE_4-gdh_4-gki_2-recP_4-spi_4-xpt_1-ddl_1	81	28476	CC 36
GCA_901327915.1	aroE_4-gdh_4-gki_2-recP_4-spi_4-xpt_1-ddl_1	81	31513	CC 36
GCA_901328025.1	aroE_4-gdh_4-gki_2-recP_4-spi_4-xpt_1-ddl_1	81	28388	CC 36
GCA_901328085.1	aroE_4-gdh_4-gki_2-recP_4-spi_4-xpt_1-ddl_1	81	28387	CC 36
GCA_901328455.1	aroE_4-gdh_4-gki_2-recP_4-spi_4-xpt_697-ddl_1	12175	28486	CC 36
GCA_901328765.1	aroE_4-gdh_4-gki_2-recP_4-spi_4-xpt_1-ddl_1	81	28497	CC 36
GCA_901328955.1	aroE_4-gdh_4-gki_2-recP_4-spi_4-xpt_1-ddl_1	81	28496	CC 36
GCA_901329005.1	aroE_4-gdh_4-gki_2-recP_4-spi_4-xpt_1-ddl_1	81	28495	CC 36
GCA_901329035.1	aroE_4-gdh_4-gki_2-recP_4-spi_4-xpt_1-ddl_1	81	28474	CC 36
GCA_901329155.1	aroE_4-gdh_4-gki_2-recP_4-spi_4-xpt_1-ddl_1	81	28473	CC 36
GCA_901329215.1	aroE_4-gdh_4-gki_2-recP_4-spi_4-xpt_1-ddl_1	81	28494	CC 36
GCA_901329355.1	aroE_4-gdh_4-gki_2-recP_4-spi_4-xpt_1-ddl_1	81	28382	CC 36
GCA_901329485.1	aroE_4-gdh_4-gki_2-recP_4-spi_4-xpt_1-ddl_1	81	28493	CC 36
GCA_901329515.1	aroE_4-gdh_4-gki_2-recP_4-spi_4-xpt_1-ddl_1	81	28472	CC 36
GCA_901329615.1	aroE_4-gdh_4-gki_2-recP_4-spi_4-xpt_1-ddl_1	81	28492	CC 36
GCA_901333425.1	aroE_4-gdh_4-gki_2-recP_4-spi_4-xpt_1-ddl_1	81	28465	CC 36
GCA_901333535.1	aroE_4-gdh_4-gki_2-recP_4-spi_4-xpt_1-ddl_1	81	Unknown/Novel	CC 36
GCA_901333565.1	aroE_4-gdh_4-gki_2-recP_4-spi_4-xpt_1-ddl_1	81	28463	CC 36
GCA_901334305.1	aroE_4-gdh_4-gki_2-recP_4-spi_4-xpt_1-ddl_1	81	28462	CC 36
GCA_901334765.1	aroE_4-gdh_4-gki_2-recP_4-spi_4-xpt_1-ddl_1	81	28461	CC 36
GCA_901337365.1	aroE_4-gdh_4-gki_2-recP_4-spi_4-xpt_1-ddl_1	81	28394	CC 36
GCA_901337415.1	aroE_4-gdh_4-gki_2-recP_4-spi_4-xpt_1-ddl_1	81	28393	CC 36
GCA_901337675.1	aroE_4-gdh_4-gki_2-recP_4-spi_4-xpt_1-ddl_1	81	28392	CC 36
GCA_901340915.1	aroE_4-gdh_4-gki_2-recP_4-spi_4-xpt_1-ddl_1	81	28475	CC 36
GCA_901341285.1	aroE_4-gdh_4-gki_2-recP_200-spi_4-xpt_1-ddl_1	7452	28484	CC 36
GCA_000468195.1	aroE_5-gdh_6-gki_1-recP_2-spi_6-xpt_3-ddl_4	90	31324	CC 3
GCA_000468335.1	aroE_5-gdh_6-gki_1-recP_2-spi_6-xpt_3-ddl_4	90	31328	CC 3
GCA_000468355.1	aroE_5-gdh_6-gki_1-recP_2-spi_6-xpt_3-ddl_4	90	31327	CC 3
GCA_000468455.1	aroE_5-gdh_6-gki_1-recP_2-spi_6-xpt_3-ddl_4	90	31329	CC 3
GCA_001083225.1	aroE_5-gdh_6-gki_1-recP_2-spi_6-xpt_3-ddl_4	90	Unknown/Novel	CC 3
GCA_001083485.1	aroE_5-gdh_6-gki_1-recP_2-spi_6-xpt_3-ddl_4	90	Unknown/Novel	CC 3
GCA_001085885.1	aroE_5-gdh_6-gki_1-recP_2-spi_6-xpt_1-ddl_14	273	175	CC 3
GCA_001086205.1	aroE_5-gdh_6-gki_1-recP_2-spi_6-xpt_3-ddl_4	90	Unknown/Novel	CC 3
GCA_001088385.1	aroE_5-gdh_6-gki_1-recP_2-spi_6-xpt_1-ddl_14	273	Unknown/Novel	CC 3
GCA_001089745.1	aroE_5-gdh_6-gki_1-recP_2-spi_6-xpt_3-ddl_4	90	Unknown/Novel	CC 3
GCA_001090145.1	aroE_5-gdh_6-gki_1-recP_2-spi_6-xpt_3-ddl_4	90	Unknown/Novel	CC 3
GCA_001090705.1	aroE_5-gdh_6-gki_1-recP_2-spi_6-xpt_3-ddl_4	90	Unknown/Novel	CC 3
GCA_001091765.1	aroE_5-gdh_6-gki_1-recP_2-spi_6-xpt_3-ddl_4	90	Unknown/Novel	CC 3
GCA_001092985.1	aroE_5-gdh_6-gki_1-recP_2-spi_6-xpt_3-ddl_4	90	Unknown/Novel	CC 3
GCA_001093285.1	aroE_5-gdh_243-gki_1-recP_2-spi_6-xpt_3-ddl_1	5127	5826	CC 3
GCA_001095205.1	aroE_5-gdh_6-gki_1-recP_2-spi_6-xpt_3-ddl_4	90	Unknown/Novel	CC 3
GCA_001095485.2	aroE_7-gdh_6-gki_1-recP_2-spi_6-xpt_15-ddl_14	146	43433	CC 3
GCA_001095825.1	aroE_5-gdh_243-gki_1-recP_2-spi_6-xpt_3-ddl_1	5127	929	CC 3
GCA_001096145.1	aroE_5-gdh_6-gki_1-recP_2-spi_2-xpt_1-ddl_14	13080	Unknown/Novel	CC 3
GCA_001097805.1	aroE_5-gdh_6-gki_1-recP_2-spi_6-xpt_1-ddl_14	273	Unknown/Novel	CC 3
GCA_001097945.1	aroE_5-gdh_243-gki_1-recP_2-spi_6-xpt_3-ddl_1	5127	922	CC 3
GCA_001098045.1	aroE_5-gdh_6-gki_1-recP_2-spi_6-xpt_3-ddl_4	90	Unknown/Novel	CC 3
GCA_001099485.1	aroE_5-gdh_6-gki_1-recP_2-spi_6-xpt_3-ddl_4	90	Unknown/Novel	CC 3
GCA_001100905.1	aroE_5-gdh_6-gki_579-recP_2-spi_6-xpt_3-ddl_4	16615	Unknown/Novel	CC 3
GCA_001101245.1	aroE_5-gdh_6-gki_1-recP_2-spi_6-xpt_1-ddl_14	273	Unknown/Novel	CC 3
GCA_001101845.1	aroE_5-gdh_6-gki_1-recP_2-spi_6-xpt_3-ddl_4	90	Unknown/Novel	CC 3
GCA_001102045.1	aroE_5-gdh_6-gki_1-recP_2-spi_6-xpt_3-ddl_4	90	Unknown/Novel	CC 3
GCA_001103085.1	aroE_5-gdh_6-gki_1-recP_2-spi_6-xpt_1-ddl_14	273	Unknown/Novel	CC 3
GCA_001103705.1	aroE_5-gdh_6-gki_1-recP_2-spi_6-xpt_3-ddl_4	90	Unknown/Novel	CC 3
GCA_001105105.1	aroE_5-gdh_6-gki_1-recP_2-spi_6-xpt_3-ddl_4	90	Unknown/Novel	CC 3
GCA_001106345.1	aroE_5-gdh_6-gki_1-recP_2-spi_6-xpt_3-ddl_4	90	Unknown/Novel	CC 3
GCA_001107005.1	aroE_5-gdh_6-gki_1-recP_2-spi_6-xpt_3-ddl_4	90	Unknown/Novel	CC 3
GCA_001108245.1	aroE_5-gdh_6-gki_1-recP_2-spi_6-xpt_3-ddl_4	90	Unknown/Novel	CC 3
GCA_001108445.1	aroE_5-gdh_6-gki_1-recP_2-spi_6-xpt_3-ddl_4	90	Unknown/Novel	CC 3
GCA_001108645.1	aroE_5-gdh_6-gki_1-recP_2-spi_6-xpt_3-ddl_4	90	400	CC 3
GCA_001109165.1	aroE_5-gdh_6-gki_1-recP_2-spi_6-xpt_3-ddl_4	90	Unknown/Novel	CC 3
GCA_001109445.1	aroE_5-gdh_6-gki_1-recP_2-spi_6-xpt_3-ddl_4	90	Unknown/Novel	CC 3
GCA_001110225.1	aroE_5-gdh_6-gki_1-recP_2-spi_6-xpt_3-ddl_4	90	Unknown/Novel	CC 3
GCA_001111445.1	aroE_5-gdh_6-gki_1-recP_2-spi_6-xpt_3-ddl_4	90	Unknown/Novel	CC 3
GCA_001111945.2	aroE_7-gdh_6-gki_1-recP_2-spi_6-xpt_15-ddl_14	146	43443	CC 3
GCA_001114685.1	aroE_5-gdh_6-gki_1-recP_2-spi_6-xpt_3-ddl_4	90	Unknown/Novel	CC 3
GCA_001115325.1	aroE_5-gdh_6-gki_1-recP_2-spi_6-xpt_3-ddl_4	90	Unknown/Novel	CC 3
GCA_001116505.1	aroE_5-gdh_6-gki_1-recP_2-spi_6-xpt_3-ddl_4	90	Unknown/Novel	CC 3
GCA_001117045.1	aroE_5-gdh_6-gki_1-recP_2-spi_6-xpt_3-ddl_4	90	Unknown/Novel	CC 3
GCA_001117185.1	aroE_5-gdh_6-gki_1-recP_2-spi_6-xpt_3-ddl_4	90	Unknown/Novel	CC 3
GCA_001117865.1	aroE_5-gdh_6-gki_1-recP_2-spi_6-xpt_3-ddl_4	90	Unknown/Novel	CC 3
GCA_001120225.1	aroE_5-gdh_6-gki_1-recP_2-spi_6-xpt_3-ddl_4	90	Unknown/Novel	CC 3
GCA_001120785.1	aroE_5-gdh_6-gki_1-recP_2-spi_6-xpt_3-ddl_4	90	Unknown/Novel	CC 3
GCA_001122925.1	aroE_5-gdh_6-gki_1-recP_2-spi_6-xpt_3-ddl_4	90	Unknown/Novel	CC 3
GCA_001123185.1	aroE_5-gdh_6-gki_1-recP_2-spi_6-xpt_3-ddl_4	90	Unknown/Novel	CC 3
GCA_001123705.1	aroE_5-gdh_6-gki_1-recP_2-spi_6-xpt_3-ddl_4	90	440	CC 3
GCA_001124045.1	aroE_5-gdh_6-gki_1-recP_2-spi_6-xpt_3-ddl_4	90	Unknown/Novel	CC 3
GCA_001124445.1	aroE_5-gdh_6-gki_1-recP_2-spi_6-xpt_1-ddl_14	273	Unknown/Novel	CC 3
GCA_001125405.1	aroE_5-gdh_6-gki_1-recP_2-spi_6-xpt_1-ddl_14	273	180	CC 3
GCA_001126205.1	aroE_5-gdh_6-gki_1-recP_2-spi_6-xpt_3-ddl_4	90	Unknown/Novel	CC 3
GCA_001126225.1	aroE_5-gdh_243-gki_1-recP_2-spi_6-xpt_3-ddl_1	5127	5802	CC 3
GCA_001127305.1	aroE_5-gdh_6-gki_1-recP_2-spi_6-xpt_3-ddl_4	90	Unknown/Novel	CC 3
GCA_001129405.1	aroE_5-gdh_6-gki_1-recP_2-spi_6-xpt_3-ddl_4	90	Unknown/Novel	CC 3
GCA_001129865.1	aroE_5-gdh_6-gki_1-recP_2-spi_6-xpt_3-ddl_4	90	Unknown/Novel	CC 3
GCA_001130145.1	aroE_5-gdh_6-gki_1-recP_2-spi_6-xpt_3-ddl_4	90	Unknown/Novel	CC 3
GCA_001130825.1	aroE_5-gdh_6-gki_1-recP_2-spi_6-xpt_3-ddl_4	90	Unknown/Novel	CC 3
GCA_001131225.1	aroE_5-gdh_6-gki_1-recP_2-spi_6-xpt_1-ddl_14	273	Unknown/Novel	CC 3
GCA_001131865.1	aroE_5-gdh_6-gki_1-recP_2-spi_6-xpt_3-ddl_4	90	363	CC 3
GCA_001131885.1	aroE_5-gdh_6-gki_1-recP_2-spi_6-xpt_3-ddl_4	90	Unknown/Novel	CC 3
GCA_001131985.1	aroE_5-gdh_6-gki_1-recP_2-spi_6-xpt_3-ddl_4	90	Unknown/Novel	CC 3
GCA_001132385.1	aroE_5-gdh_6-gki_1-recP_2-spi_6-xpt_3-ddl_4	90	Unknown/Novel	CC 3
GCA_001133265.1	aroE_5-gdh_6-gki_1-recP_2-spi_6-xpt_3-ddl_4	90	Unknown/Novel	CC 3
GCA_001133705.1	aroE_5-gdh_6-gki_1-recP_2-spi_6-xpt_3-ddl_4	90	Unknown/Novel	CC 3
GCA_001136225.1	aroE_5-gdh_6-gki_1-recP_2-spi_6-xpt_3-ddl_4	90	Unknown/Novel	CC 3
GCA_001136245.1	aroE_5-gdh_6-gki_1-recP_2-spi_6-xpt_1-ddl_14	273	182	CC 3
GCA_001136425.1	aroE_5-gdh_243-gki_1-recP_2-spi_6-xpt_3-ddl_1	5127	775	CC 3
GCA_001137665.1	aroE_5-gdh_6-gki_33-recP_2-spi_6-xpt_3-ddl_4	95	Unknown/Novel	CC 3
GCA_001138625.1	aroE_5-gdh_6-gki_1-recP_2-spi_6-xpt_3-ddl_4	90	Unknown/Novel	CC 3
GCA_001138805.1	aroE_5-gdh_243-gki_1-recP_2-spi_6-xpt_3-ddl_1	5127	928	CC 3
GCA_001139305.1	aroE_5-gdh_6-gki_1-recP_2-spi_6-xpt_3-ddl_4	90	Unknown/Novel	CC 3
GCA_001139465.1	aroE_5-gdh_6-gki_1-recP_2-spi_6-xpt_3-ddl_4	90	Unknown/Novel	CC 3
GCA_001139925.1	aroE_5-gdh_6-gki_1-recP_2-spi_6-xpt_3-ddl_4	90	Unknown/Novel	CC 3
GCA_001140925.1	aroE_5-gdh_6-gki_1-recP_2-spi_6-xpt_3-ddl_4	90	Unknown/Novel	CC 3
GCA_001142205.1	aroE_5-gdh_6-gki_1-recP_2-spi_6-xpt_3-ddl_4	90	Unknown/Novel	CC 3
GCA_001142365.1	aroE_5-gdh_6-gki_1-recP_2-spi_6-xpt_3-ddl_4	90	Unknown/Novel	CC 3
GCA_001142765.1	aroE_5-gdh_6-gki_1-recP_2-spi_6-xpt_3-ddl_4	90	Unknown/Novel	CC 3
GCA_001143465.1	aroE_5-gdh_6-gki_1-recP_2-spi_6-xpt_3-ddl_4	90	397	CC 3
GCA_001145325.1	aroE_5-gdh_6-gki_1-recP_2-spi_6-xpt_3-ddl_4	90	Unknown/Novel	CC 3
GCA_001145405.1	aroE_5-gdh_6-gki_1-recP_2-spi_6-xpt_3-ddl_4	90	Unknown/Novel	CC 3
GCA_001147005.1	aroE_5-gdh_6-gki_1-recP_2-spi_6-xpt_3-ddl_4	90	Unknown/Novel	CC 3
GCA_001147285.1	aroE_5-gdh_6-gki_1-recP_2-spi_6-xpt_3-ddl_4	90	Unknown/Novel	CC 3
GCA_001147385.1	aroE_5-gdh_243-gki_1-recP_2-spi_6-xpt_644-ddl_1	13123	956	CC 3
GCA_001149725.1	aroE_5-gdh_6-gki_1-recP_2-spi_6-xpt_1-ddl_14	273	Unknown/Novel	CC 3
GCA_001149805.1	aroE_5-gdh_243-gki_1-recP_2-spi_6-xpt_3-ddl_1	5127	932	CC 3
GCA_001149985.1	aroE_5-gdh_6-gki_1-recP_2-spi_6-xpt_3-ddl_4	90	Unknown/Novel	CC 3
GCA_001150545.1	aroE_5-gdh_6-gki_1-recP_2-spi_6-xpt_3-ddl_4	90	Unknown/Novel	CC 3
GCA_001152365.1	aroE_5-gdh_6-gki_1-recP_2-spi_6-xpt_3-ddl_4	90	Unknown/Novel	CC 3
GCA_001152785.1	aroE_5-gdh_6-gki_1-recP_2-spi_6-xpt_3-ddl_4	90	Unknown/Novel	CC 3
GCA_001152805.1	aroE_5-gdh_6-gki_33-recP_2-spi_6-xpt_3-ddl_4	95	668	CC 3
GCA_001154785.1	aroE_5-gdh_6-gki_1-recP_2-spi_6-xpt_1-ddl_14	273	176	CC 3
GCA_001156025.1	aroE_5-gdh_243-gki_1-recP_2-spi_6-xpt_3-ddl_1	5127	921	CC 3
GCA_001157545.1	aroE_5-gdh_6-gki_1-recP_2-spi_6-xpt_3-ddl_4	90	Unknown/Novel	CC 3
GCA_001157625.1	aroE_5-gdh_243-gki_1-recP_2-spi_6-xpt_3-ddl_1	5127	927	CC 3
GCA_001157645.1	aroE_5-gdh_6-gki_1-recP_2-spi_6-xpt_3-ddl_4	90	Unknown/Novel	CC 3
GCA_001157825.1	aroE_5-gdh_6-gki_1-recP_2-spi_6-xpt_3-ddl_4	90	Unknown/Novel	CC 3
GCA_001158185.1	aroE_5-gdh_6-gki_1-recP_2-spi_6-xpt_3-ddl_4	90	Unknown/Novel	CC 3
GCA_001158525.2	aroE_5-gdh_6-gki_134-recP_2-spi_6-xpt_3-ddl_4	1954	1012	CC 3
GCA_001159105.1	aroE_5-gdh_6-gki_1-recP_2-spi_6-xpt_3-ddl_4	90	Unknown/Novel	CC 3
GCA_001159925.1	aroE_5-gdh_6-gki_1-recP_2-spi_6-xpt_3-ddl_4	90	Unknown/Novel	CC 3
GCA_001160025.1	aroE_5-gdh_243-gki_1-recP_2-spi_6-xpt_3-ddl_1	5127	932	CC 3
GCA_001160425.1	aroE_5-gdh_6-gki_1-recP_2-spi_6-xpt_3-ddl_4	90	Unknown/Novel	CC 3
GCA_001161205.1	aroE_5-gdh_6-gki_1-recP_2-spi_6-xpt_3-ddl_4	90	Unknown/Novel	CC 3
GCA_001162465.1	aroE_5-gdh_6-gki_1-recP_2-spi_6-xpt_3-ddl_4	90	Unknown/Novel	CC 3
GCA_001162625.1	aroE_5-gdh_243-gki_1-recP_2-spi_6-xpt_3-ddl_1	5127	778	CC 3
GCA_001163685.1	aroE_5-gdh_6-gki_1-recP_2-spi_6-xpt_3-ddl_4	90	Unknown/Novel	CC 3
GCA_001164105.1	aroE_5-gdh_6-gki_1-recP_2-spi_6-xpt_3-ddl_4	90	Unknown/Novel	CC 3
GCA_001164645.1	aroE_5-gdh_6-gki_1-recP_2-spi_6-xpt_3-ddl_4	90	Unknown/Novel	CC 3
GCA_001164785.1	aroE_5-gdh_243-gki_1-recP_2-spi_6-xpt_3-ddl_1	5127	924	CC 3
GCA_001165225.1	aroE_5-gdh_243-gki_1-recP_2-spi_6-xpt_3-ddl_1	5127	925	CC 3
GCA_001166685.1	aroE_5-gdh_6-gki_1-recP_2-spi_6-xpt_3-ddl_4	90	371	CC 3
GCA_001168045.1	aroE_5-gdh_6-gki_33-recP_2-spi_6-xpt_3-ddl_4	95	667	CC 3
GCA_001168885.1	aroE_5-gdh_6-gki_1-recP_2-spi_6-xpt_3-ddl_4	90	Unknown/Novel	CC 3
GCA_001173005.1	aroE_5-gdh_6-gki_1-recP_2-spi_6-xpt_3-ddl_4	90	Unknown/Novel	CC 3
GCA_001173405.1	aroE_5-gdh_243-gki_1-recP_2-spi_6-xpt_3-ddl_1	5127	924	CC 3
GCA_001173665.1	aroE_317-gdh_6-gki_1-recP_2-spi_6-xpt_3-ddl_4	10291	Unknown/Novel	CC 3
GCA_001174685.1	aroE_5-gdh_6-gki_1-recP_2-spi_6-xpt_3-ddl_4	90	Unknown/Novel	CC 3
GCA_001193875.1	aroE_5-gdh_243-gki_1-recP_2-spi_6-xpt_3-ddl_1	5127	772	CC 3
GCA_001202795.1	aroE_5-gdh_6-gki_1-recP_2-spi_6-xpt_3-ddl_4	90	Unknown/Novel	CC 3
GCA_001205455.1	aroE_5-gdh_243-gki_1-recP_2-spi_6-xpt_3-ddl_1	5127	5801	CC 3
GCA_001300775.2	aroE_7-gdh_6-gki_1-recP_2-spi_6-xpt_15-ddl_14	146	978	CC 3
GCA_001328915.1	aroE_5-gdh_6-gki_1-recP_2-spi_6-xpt_3-ddl_4	90	Unknown/Novel	CC 3
GCA_001328955.1	aroE_5-gdh_6-gki_1-recP_2-spi_6-xpt_1-ddl_14	273	Unknown/Novel	CC 3
GCA_001328995.1	aroE_5-gdh_6-gki_1-recP_2-spi_6-xpt_1-ddl_14	273	Unknown/Novel	CC 3
GCA_001329135.1	aroE_5-gdh_6-gki_1-recP_2-spi_6-xpt_3-ddl_4	90	Unknown/Novel	CC 3
GCA_001329215.1	aroE_5-gdh_6-gki_1-recP_2-spi_6-xpt_1-ddl_14	273	Unknown/Novel	CC 3
GCA_001329255.1	aroE_5-gdh_6-gki_1-recP_2-spi_6-xpt_3-ddl_4	90	Unknown/Novel	CC 3
GCA_001329275.1	aroE_5-gdh_6-gki_1-recP_2-spi_6-xpt_3-ddl_4	90	Unknown/Novel	CC 3
GCA_001329295.1	aroE_5-gdh_6-gki_1-recP_2-spi_6-xpt_1-ddl_14	273	Unknown/Novel	CC 3
GCA_001329355.1	aroE_5-gdh_6-gki_1-recP_2-spi_6-xpt_3-ddl_4	90	Unknown/Novel	CC 3
GCA_001329435.1	aroE_5-gdh_6-gki_1-recP_2-spi_6-xpt_3-ddl_4	90	Unknown/Novel	CC 3
GCA_001329475.1	aroE_5-gdh_6-gki_1-recP_2-spi_6-xpt_1-ddl_14	273	173	CC 3
GCA_001329575.1	aroE_5-gdh_6-gki_1-recP_2-spi_6-xpt_1-ddl_14	273	Unknown/Novel	CC 3
GCA_001329615.1	aroE_5-gdh_6-gki_1-recP_2-spi_6-xpt_3-ddl_4	90	Unknown/Novel	CC 3
GCA_001329635.1	aroE_5-gdh_6-gki_1-recP_2-spi_6-xpt_3-ddl_4	90	Unknown/Novel	CC 3
GCA_001329655.1	aroE_5-gdh_6-gki_1-recP_2-spi_6-xpt_3-ddl_4	90	452	CC 3
GCA_001329675.1	aroE_5-gdh_6-gki_1-recP_2-spi_6-xpt_3-ddl_4	90	Unknown/Novel	CC 3
GCA_001329715.1	aroE_5-gdh_6-gki_1-recP_2-spi_6-xpt_3-ddl_4	90	Unknown/Novel	CC 3
GCA_001329755.1	aroE_5-gdh_6-gki_1-recP_2-spi_6-xpt_3-ddl_4	90	Unknown/Novel	CC 3
GCA_001329775.1	aroE_5-gdh_6-gki_1-recP_2-spi_6-xpt_3-ddl_4	90	Unknown/Novel	CC 3
GCA_001329795.1	aroE_5-gdh_6-gki_1-recP_2-spi_6-xpt_3-ddl_4	90	Unknown/Novel	CC 3
GCA_001329815.1	aroE_5-gdh_6-gki_1-recP_2-spi_6-xpt_3-ddl_4	90	Unknown/Novel	CC 3
GCA_001329835.1	aroE_5-gdh_6-gki_1-recP_2-spi_6-xpt_3-ddl_4	90	Unknown/Novel	CC 3
GCA_001329855.1	aroE_5-gdh_6-gki_1-recP_2-spi_6-xpt_3-ddl_4	90	Unknown/Novel	CC 3
GCA_001329875.1	aroE_5-gdh_6-gki_1-recP_2-spi_6-xpt_3-ddl_4	90	Unknown/Novel	CC 3
GCA_001329895.1	aroE_5-gdh_6-gki_1-recP_2-spi_6-xpt_3-ddl_4	90	Unknown/Novel	CC 3
GCA_001330035.1	aroE_5-gdh_6-gki_1-recP_2-spi_6-xpt_3-ddl_4	90	Unknown/Novel	CC 3
GCA_001330215.1	aroE_5-gdh_6-gki_1-recP_2-spi_6-xpt_3-ddl_4	90	Unknown/Novel	CC 3
GCA_001330235.1	aroE_5-gdh_6-gki_1-recP_2-spi_6-xpt_3-ddl_4	90	Unknown/Novel	CC 3
GCA_001330275.1	aroE_5-gdh_6-gki_1-recP_2-spi_6-xpt_3-ddl_4	90	Unknown/Novel	CC 3
GCA_001330295.1	aroE_5-gdh_4-gki_1-recP_2-spi_6-xpt_3-ddl_4	4759	Unknown/Novel	CC 3
GCA_001330455.1	aroE_5-gdh_6-gki_1-recP_2-spi_6-xpt_3-ddl_4	90	Unknown/Novel	CC 3
GCA_001330475.1	aroE_5-gdh_6-gki_1-recP_2-spi_6-xpt_3-ddl_26	3387	Unknown/Novel	CC 3
GCA_001330615.1	aroE_5-gdh_6-gki_1-recP_2-spi_6-xpt_3-ddl_4	90	Unknown/Novel	CC 3
GCA_001330775.1	aroE_5-gdh_6-gki_1-recP_2-spi_6-xpt_3-ddl_4	90	Unknown/Novel	CC 3
GCA_001330835.1	aroE_5-gdh_6-gki_1-recP_2-spi_6-xpt_3-ddl_4	90	Unknown/Novel	CC 3
GCA_001330875.1	aroE_5-gdh_6-gki_1-recP_2-spi_6-xpt_3-ddl_4	90	Unknown/Novel	CC 3
GCA_001342815.1	aroE_5-gdh_243-gki_1-recP_2-spi_6-xpt_3-ddl_1	5127	774	CC 3
GCA_001343455.1	aroE_5-gdh_243-gki_1-recP_2-spi_6-xpt_3-ddl_1	5127	Unknown/Novel	CC 3
GCA_001344555.1	aroE_5-gdh_243-gki_1-recP_2-spi_6-xpt_3-ddl_1	5127	776	CC 3
GCA_001345835.1	aroE_5-gdh_243-gki_1-recP_2-spi_6-xpt_3-ddl_1	5127	933	CC 3
GCA_001345875.1	aroE_5-gdh_243-gki_1-recP_2-spi_6-xpt_3-ddl_1	5127	924	CC 3
GCA_001347095.1	aroE_5-gdh_243-gki_1-recP_2-spi_6-xpt_3-ddl_1	5127	932	CC 3
GCA_001347315.1	aroE_5-gdh_243-gki_1-recP_2-spi_6-xpt_3-ddl_1	5127	772	CC 3
GCA_001347575.1	aroE_5-gdh_243-gki_1-recP_2-spi_6-xpt_3-ddl_1	5127	935	CC 3
GCA_001347915.1	aroE_5-gdh_243-gki_1-recP_2-spi_6-xpt_3-ddl_1	5127	928	CC 3
GCA_001347975.1	aroE_5-gdh_243-gki_1-recP_2-spi_6-xpt_3-ddl_1	5127	5826	CC 3
GCA_002014095.1	aroE_5-gdh_6-gki_1-recP_2-spi_6-xpt_3-ddl_4	90	Unknown/Novel	CC 3
GCA_003492505.1	aroE_5-gdh_6-gki_1-recP_2-spi_6-xpt_3-ddl_4	90	Unknown/Novel	CC 3
GCA_006376335.1	aroE_5-gdh_6-gki_1-recP_2-spi_6-xpt_3-ddl_4	90	Unknown/Novel	CC 3
GCA_019397665.1	aroE_5-gdh_6-gki_1-recP_2-spi_6-xpt_3-ddl_4	90	Unknown/Novel	CC 3
GCA_019397695.1	aroE_5-gdh_6-gki_1-recP_2-spi_6-xpt_3-ddl_4	90	Unknown/Novel	CC 3
GCA_019398245.1	aroE_5-gdh_6-gki_1-recP_2-spi_6-xpt_3-ddl_4	90	Unknown/Novel	CC 3
GCA_019398345.1	aroE_5-gdh_6-gki_1-recP_2-spi_6-xpt_3-ddl_4	90	Unknown/Novel	CC 3
GCA_019398655.1	aroE_5-gdh_6-gki_1-recP_2-spi_6-xpt_3-ddl_4	90	Unknown/Novel	CC 3
GCA_019398765.1	aroE_5-gdh_6-gki_1-recP_2-spi_6-xpt_3-ddl_4	90	Unknown/Novel	CC 3
GCA_019398845.1	aroE_5-gdh_6-gki_1-recP_2-spi_6-xpt_3-ddl_4	90	Unknown/Novel	CC 3
GCA_019398945.1	aroE_5-gdh_6-gki_1-recP_2-spi_6-xpt_3-ddl_4	90	Unknown/Novel	CC 3
GCA_019399305.1	aroE_5-gdh_6-gki_1-recP_2-spi_6-xpt_3-ddl_4	90	Unknown/Novel	CC 3
GCA_019399505.1	aroE_5-gdh_6-gki_1-recP_2-spi_6-xpt_3-ddl_4	90	Unknown/Novel	CC 3
GCA_019399565.1	aroE_5-gdh_6-gki_1-recP_2-spi_6-xpt_3-ddl_4	90	Unknown/Novel	CC 3
GCA_019399805.1	aroE_5-gdh_6-gki_1-recP_2-spi_6-xpt_3-ddl_4	90	Unknown/Novel	CC 3
GCA_019399845.1	aroE_5-gdh_6-gki_1-recP_2-spi_6-xpt_3-ddl_4	90	Unknown/Novel	CC 3
GCA_900005375.1	aroE_5-gdh_6-gki_1-recP_2-spi_6-xpt_3-ddl_4	90	Unknown/Novel	CC 3
GCA_900043095.1	aroE_5-gdh_6-gki_1-recP_2-spi_6-xpt_1-ddl_14	273	Unknown/Novel	CC 3
GCA_900047655.1	aroE_5-gdh_6-gki_1-recP_2-spi_6-xpt_1-ddl_14	273	17092	CC 3
GCA_900188855.1	aroE_7-gdh_6-gki_1-recP_12-spi_14-xpt_15-ddl_14	2457	Unknown/Novel	CC 3
GCA_900461665.1	aroE_5-gdh_6-gki_1-recP_2-spi_6-xpt_3-ddl_54	94	Unknown/Novel	CC 3
GCA_901213745.1	aroE_5-gdh_6-gki_1-recP_2-spi_6-xpt_1-ddl_14	273	Unknown/Novel	CC 3
GCA_901214795.1	aroE_7-gdh_6-gki_1-recP_2-spi_6-xpt_15-ddl_137	1129	Unknown/Novel	CC 3
GCA_901215105.1	aroE_5-gdh_6-gki_1-recP_2-spi_6-xpt_3-ddl_4	90	Unknown/Novel	CC 3
GCA_901215555.1	aroE_5-gdh_6-gki_1-recP_2-spi_6-xpt_3-ddl_4	90	26003	CC 3
GCA_901215735.1	aroE_5-gdh_6-gki_1-recP_2-spi_6-xpt_3-ddl_4	90	Unknown/Novel	CC 3
GCA_901215795.1	aroE_5-gdh_6-gki_1-recP_2-spi_6-xpt_1-ddl_14	273	26023	CC 3
GCA_901216465.1	aroE_5-gdh_6-gki_1-recP_2-spi_6-xpt_3-ddl_4	90	Unknown/Novel	CC 3
GCA_901218045.1	aroE_7-gdh_5-gki_1-recP_13-spi_6-xpt_1-ddl_14	10700	Unknown/Novel	CC 3
GCA_901219875.1	aroE_5-gdh_6-gki_1-recP_2-spi_6-xpt_3-ddl_4	90	26005	CC 3
GCA_901220315.1	aroE_7-gdh_6-gki_1-recP_2-spi_6-xpt_1-ddl_285	3207	18877	CC 3
GCA_901221325.1	aroE_7-gdh_6-gki_1-recP_12-spi_6-xpt_15-ddl_14	3051	Unknown/Novel	CC 3
GCA_901221475.1	aroE_5-gdh_462-gki_1-recP_35-spi_6-xpt_1-ddl_14	11700	Unknown/Novel	CC 3
GCA_901222625.1	aroE_7-gdh_5-gki_1-recP_2-spi_6-xpt_1-ddl_14	3473	Unknown/Novel	CC 3
GCA_901222945.1	aroE_7-gdh_6-gki_1-recP_2-spi_6-xpt_1-ddl_285	3207	Unknown/Novel	CC 3
GCA_901223055.1	aroE_7-gdh_6-gki_1-recP_2-spi_6-xpt_1-ddl_1	9492	26089	CC 3
GCA_901224485.1	aroE_5-gdh_6-gki_1-recP_2-spi_6-xpt_3-ddl_14	2156	Unknown/Novel	CC 3
GCA_901225525.1	aroE_5-gdh_6-gki_1-recP_35-spi_6-xpt_1-ddl_14	4039	15183	CC 3
GCA_901227385.1	aroE_5-gdh_6-gki_1-recP_35-spi_6-xpt_1-ddl_14	4039	14622	CC 3
GCA_901228895.1	aroE_7-gdh_6-gki_1-recP_2-spi_6-xpt_15-ddl_14	146	Unknown/Novel	CC 3
GCA_901229485.1	aroE_7-gdh_6-gki_1-recP_1-spi_6-xpt_15-ddl_14	145	38618	CC 3
GCA_901231545.1	aroE_5-gdh_6-gki_1-recP_2-spi_6-xpt_3-ddl_4	90	Unknown/Novel	CC 3
GCA_901231695.1	aroE_5-gdh_6-gki_1-recP_2-spi_6-xpt_3-ddl_4	90	Unknown/Novel	CC 3
GCA_901231775.1	aroE_7-gdh_6-gki_1-recP_2-spi_6-xpt_1-ddl_285	3207	26052	CC 3
GCA_901231965.1	aroE_7-gdh_6-gki_1-recP_2-spi_6-xpt_1-ddl_285	3207	26051	CC 3
GCA_901232675.1	aroE_7-gdh_6-gki_1-recP_1-spi_6-xpt_15-ddl_14	145	9134	CC 3
GCA_901233245.1	aroE_7-gdh_5-gki_1-recP_2-spi_6-xpt_1-ddl_9	9500	26093	CC 3
GCA_901243875.1	aroE_7-gdh_6-gki_1-recP_2-spi_6-xpt_15-ddl_14	146	Unknown/Novel	CC 3
GCA_901244655.1	aroE_7-gdh_6-gki_1-recP_2-spi_6-xpt_15-ddl_14	146	Unknown/Novel	CC 3
GCA_901245465.1	aroE_5-gdh_6-gki_1-recP_2-spi_6-xpt_3-ddl_4	90	Unknown/Novel	CC 3
GCA_901249945.1	aroE_7-gdh_5-gki_1-recP_2-spi_6-xpt_720-ddl_14	12599	Unknown/Novel	CC 3
GCA_901252225.1	aroE_5-gdh_6-gki_1-recP_2-spi_6-xpt_3-ddl_14	2156	18299	CC 3
GCA_901253965.1	aroE_5-gdh_6-gki_1-recP_2-spi_6-xpt_3-ddl_4	90	Unknown/Novel	CC 3
GCA_901254545.1	aroE_5-gdh_6-gki_1-recP_2-spi_6-xpt_3-ddl_4	90	Unknown/Novel	CC 3
GCA_901256515.1	aroE_5-gdh_6-gki_1-recP_35-spi_6-xpt_1-ddl_14	4039	14927	CC 3
GCA_901259145.1	aroE_230-gdh_6-gki_1-recP_2-spi_6-xpt_1-ddl_14	7460	26088	CC 3
GCA_901259615.1	aroE_5-gdh_6-gki_1-recP_2-spi_6-xpt_1-ddl_8	7417	26084	CC 3
GCA_901259795.1	aroE_5-gdh_6-gki_1-recP_35-spi_6-xpt_1-ddl_14	4039	14913	CC 3
GCA_901259985.1	aroE_5-gdh_6-gki_1-recP_2-spi_6-xpt_3-ddl_4	90	27621	CC 3
GCA_901260475.1	aroE_5-gdh_6-gki_1-recP_2-spi_6-xpt_3-ddl_4	90	Unknown/Novel	CC 3
GCA_901260515.1	aroE_7-gdh_6-gki_1-recP_2-spi_6-xpt_15-ddl_14	146	Unknown/Novel	CC 3
GCA_901261035.1	aroE_5-gdh_6-gki_1-recP_2-spi_6-xpt_3-ddl_4	90	25998	CC 3
GCA_901262355.1	aroE_230-gdh_6-gki_1-recP_2-spi_6-xpt_1-ddl_14	7460	26087	CC 3
GCA_901262475.1	aroE_5-gdh_6-gki_1-recP_2-spi_6-xpt_3-ddl_4	90	Unknown/Novel	CC 3
GCA_901263005.1	aroE_5-gdh_6-gki_1-recP_2-spi_6-xpt_3-ddl_4	90	Unknown/Novel	CC 3
GCA_901263265.1	aroE_7-gdh_6-gki_1-recP_2-spi_6-xpt_1-ddl_285	3207	Unknown/Novel	CC 3
GCA_901264645.1	aroE_7-gdh_6-gki_1-recP_2-spi_6-xpt_1-ddl_285	3207	17543	CC 3
GCA_901266055.1	aroE_5-gdh_6-gki_1-recP_2-spi_6-xpt_1-ddl_14	273	Unknown/Novel	CC 3
GCA_901267965.1	aroE_5-gdh_6-gki_1-recP_2-spi_6-xpt_3-ddl_54	94	26012	CC 3
GCA_901269945.1	aroE_7-gdh_6-gki_1-recP_2-spi_6-xpt_15-ddl_14	146	26015	CC 3
GCA_901270925.1	aroE_5-gdh_6-gki_1-recP_2-spi_6-xpt_1-ddl_14	273	26022	CC 3
GCA_901270965.1	aroE_5-gdh_6-gki_1-recP_2-spi_6-xpt_3-ddl_4	90	Unknown/Novel	CC 3
GCA_901272505.1	aroE_7-gdh_6-gki_1-recP_2-spi_6-xpt_1-ddl_1	9492	Unknown/Novel	CC 3
GCA_901272775.1	aroE_7-gdh_6-gki_1-recP_2-spi_6-xpt_1-ddl_14	385	26025	CC 3
[truncated: 19,262 more rows]

## Sheet: Table S6
Table S6 ST distribution for 20,909 (21,260 minus 311) genomes
ST	Count number	Percent (%)
217	459	2.19104
156	390	1.86166
180	387	1.84734
199	349	1.66595
191	319	1.52275
4414	297	1.41773
138	297	1.41773
289	266	1.26975
63	264	1.2602
9	252	1.20292
320	230	1.0979
433	229	1.09313
802	207	0.988114
2062	204	0.973793
53	194	0.926059
90	185	0.883097
989	175	0.835362
62	167	0.797174
162	164	0.782854
230	159	0.758986
81	153	0.730345
172	145	0.692157
236	141	0.673063
218	130	0.620555
271	127	0.606234
315	124	0.591914
4209	119	0.568046
347	119	0.568046
3081	112	0.534632
124	108	0.515538
558	101	0.482123
393	100	0.47735
1094	99	0.472576
15	98	0.467803
6279	97	0.463029
4133	96	0.458256
448	95	0.453482
242	91	0.434388
439	91	0.434388
3774	88	0.420068
4413	87	0.415294
458	86	0.410521
847	85	0.405747
13	83	0.3962
8687	82	0.391427
338	81	0.386653
361	81	0.386653
97	79	0.377106
2059	78	0.372333
1439	77	0.367559
1262	76	0.362786
66	75	0.358012
205	72	0.343692
5647	72	0.343692
2053	71	0.338918
176	69	0.329371
7052	66	0.315051
595	63	0.30073
36	62	0.295957
695	62	0.295957
473	61	0.291183
193	59	0.281636
612	58	0.276863
99	58	0.276863
5902	58	0.276863
910	57	0.272089
303	57	0.272089
2285	57	0.272089
4395	56	0.267316
304	55	0.262542
306	55	0.262542
1701	55	0.262542
1221	53	0.252995
5073	52	0.248222
4965	50	0.238675
618	49	0.233901
113	49	0.233901
913	48	0.229128
5103	48	0.229128
7067	47	0.224354
5659	47	0.224354
2416	43	0.20526
5706	42	0.200487
1692	42	0.200487
420	42	0.200487
5410	41	0.195713
6692	40	0.19094
4136	40	0.19094
392	40	0.19094
1447	39	0.186166
4420	39	0.186166
2652	38	0.181393
2909	38	0.181393
4422	38	0.181393
344	38	0.181393
42	37	0.176619
2705	36	0.171846
100	35	0.167072
220	35	0.167072
700	35	0.167072
65	34	0.162299
227	34	0.162299
5516	33	0.157525
2108	33	0.157525
3404	33	0.157525
280	32	0.152752
4088	32	0.152752
241	31	0.147978
460	30	0.143205
3735	30	0.143205
2421	30	0.143205
4881	30	0.143205
185	30	0.143205
2213	30	0.143205
7055	29	0.138431
273	29	0.138431
1390	29	0.138431
7050	29	0.138431
4984	29	0.138431
870	28	0.133658
667	28	0.133658
6277	28	0.133658
673	28	0.133658
445	28	0.133658
4936	28	0.133658
4956	27	0.128884
1635	27	0.128884
915	27	0.128884
1421	26	0.124111
3329	26	0.124111
72	26	0.124111
5127	26	0.124111
30	26	0.124111
440	26	0.124111
2174	26	0.124111
4408	26	0.124111
1233	25	0.119337
816	25	0.119337
4033	25	0.119337
9568	25	0.119337
177	25	0.119337
438	25	0.119337
10545	25	0.119337
10542	24	0.114564
1492	24	0.114564
3407	24	0.114564
4403	24	0.114564
376	24	0.114564
179	24	0.114564
496	24	0.114564
276	24	0.114564
10543	24	0.114564
5326	23	0.10979
498	23	0.10979
4389	23	0.10979
452	23	0.10979
6239	22	0.105017
3983	22	0.105017
143	22	0.105017
5092	22	0.105017
246	22	0.105017
6121	22	0.105017
6011	21	0.100243
901	21	0.100243
5521	21	0.100243
4084	21	0.100243
3214	21	0.100243
6524	21	0.100243
2754	20	0.09547
11721	20	0.09547
3548	20	0.09547
311	20	0.09547
1379	20	0.09547
4087	20	0.09547
1451	19	0.0906965
925	19	0.0906965
5080	19	0.0906965
2927	19	0.0906965
2987	19	0.0906965
446	19	0.0906965
1778	19	0.0906965
11763	19	0.0906965
4396	19	0.0906965
386	19	0.0906965
4029	19	0.0906965
1012	19	0.0906965
5653	18	0.085923
239	18	0.085923
10544	18	0.085923
4929	18	0.085923
5873	18	0.085923
3669	18	0.085923
3454	18	0.085923
3324	18	0.085923
4418	18	0.085923
9813	18	0.085923
982	18	0.085923
8958	17	0.0811495
5624	17	0.0811495
876	17	0.0811495
447	17	0.0811495
1876	17	0.0811495
8713	17	0.0811495
646	17	0.0811495
2319	17	0.0811495
5227	17	0.0811495
3280	16	0.076376
135	16	0.076376
6095	16	0.076376
4113	16	0.076376
11745	16	0.076376
11770	16	0.076376
8599	16	0.076376
6707	16	0.076376
3847	16	0.076376
8835	16	0.076376
74	16	0.076376
5734	16	0.076376
4108	16	0.076376
10427	16	0.076376
1078	15	0.0716025
5483	15	0.0716025
1381	15	0.0716025
6040	15	0.0716025
2355	15	0.0716025
2068	15	0.0716025
10534	15	0.0716025
505	15	0.0716025
6710	15	0.0716025
2169	15	0.0716025
3207	15	0.0716025
58	15	0.0716025
2911	15	0.0716025
4406	15	0.0716025
1176	15	0.0716025
4966	15	0.0716025
917	15	0.0716025
9532	15	0.0716025
1480	14	0.066829
10625	14	0.066829
5120	14	0.066829
9572	14	0.066829
5477	14	0.066829
9530	14	0.066829
444	14	0.066829
11726	14	0.066829
3339	14	0.066829
5266	14	0.066829
3544	14	0.066829
310	14	0.066829
4451	14	0.066829
247	14	0.066829
698	14	0.066829
2624	14	0.066829
11766	14	0.066829
2218	13	0.0620555
200	13	0.0620555
9517	13	0.0620555
5784	13	0.0620555
9473	13	0.0620555
7319	13	0.0620555
5072	13	0.0620555
9570	13	0.0620555
102	13	0.0620555
6245	13	0.0620555
5093	13	0.0620555
4390	13	0.0620555
7084	13	0.0620555
7687	13	0.0620555
10550	13	0.0620555
547	13	0.0620555
5285	13	0.0620555
1766	13	0.0620555
3545	13	0.0620555
7318	13	0.0620555
1504	13	0.0620555
10546	13	0.0620555
10603	12	0.057282
1201	12	0.057282
2902	12	0.057282
4411	12	0.057282
260	12	0.057282
4421	12	0.057282
146	12	0.057282
4391	12	0.057282
1961	12	0.057282
2414	12	0.057282
6103	12	0.057282
10587	12	0.057282
6025	12	0.057282
5625	12	0.057282
6390	12	0.057282
1096	12	0.057282
11676	12	0.057282
1373	11	0.0525085
1526	11	0.0525085
10600	11	0.0525085
2220	11	0.0525085
11691	11	0.0525085
2572	11	0.0525085
425	11	0.0525085
4893	11	0.0525085
6012	11	0.0525085
432	11	0.0525085
819	11	0.0525085
4368	11	0.0525085
4398	11	0.0525085
7054	11	0.0525085
9491	11	0.0525085
2752	11	0.0525085
6043	11	0.0525085
1121	11	0.0525085
1737	11	0.0525085
2178	11	0.0525085
5628	11	0.0525085
1292	11	0.0525085
6693	11	0.0525085
7105	11	0.0525085
10547	11	0.0525085
8052	11	0.0525085
11711	11	0.0525085
9457	11	0.0525085
6389	11	0.0525085
11716	10	0.047735
423	10	0.047735
659	10	0.047735
10517	10	0.047735
9067	10	0.047735
494	10	0.047735
3058	10	0.047735
11758	10	0.047735
654	10	0.047735
10463	10	0.047735
7888	10	0.047735
3450	10	0.047735
8714	10	0.047735
568	10	0.047735
6031	10	0.047735
7068	10	0.047735
1092	10	0.047735
7723	10	0.047735
13921	10	0.047735
1714	10	0.047735
4654	10	0.047735
5095	10	0.047735
5396	10	0.047735
7738	10	0.047735
4399	10	0.047735
9519	10	0.047735
5096	10	0.047735
5636	10	0.047735
1257	10	0.047735
651	9	0.0429615
6703	9	0.0429615
105	9	0.0429615
11336	9	0.0429615
2991	9	0.0429615
4955	9	0.0429615
404	9	0.0429615
123	9	0.0429615
2185	9	0.0429615
9546	9	0.0429615
4038	9	0.0429615
2223	9	0.0429615
1220	9	0.0429615
5511	9	0.0429615
11700	9	0.0429615
4039	9	0.0429615
4138	9	0.0429615
8164	9	0.0429615
490	9	0.0429615
4560	9	0.0429615
717	9	0.0429615
1475	9	0.0429615
1729	9	0.0429615
507	9	0.0429615
1847	9	0.0429615
37	9	0.0429615
4216	9	0.0429615
5593	9	0.0429615
899	9	0.0429615
6709	9	0.0429615
232	9	0.0429615
8672	9	0.0429615
9549	9	0.0429615
43	9	0.0429615
10591	9	0.0429615
3397	9	0.0429615
5115	9	0.0429615
615	9	0.0429615
235	9	0.0429615
346	9	0.0429615
257	8	0.038188
10571	8	0.038188
5068	8	0.038188
5228	8	0.038188
353	8	0.038188
10367	8	0.038188
411	8	0.038188
1877	8	0.038188
10572	8	0.038188
10553	8	0.038188
9408	8	0.038188
5726	8	0.038188
1073	8	0.038188
1269	8	0.038188
1227	8	0.038188
11690	8	0.038188
8379	8	0.038188
67	8	0.038188
11720	8	0.038188
9897	8	0.038188
5778	8	0.038188
3473	8	0.038188
10570	8	0.038188
11756	8	0.038188
9553	8	0.038188
4423	8	0.038188
79	8	0.038188
76	8	0.038188
2447	8	0.038188
1372	8	0.038188
327	8	0.038188
1839	8	0.038188
629	8	0.038188
4402	8	0.038188
4908	8	0.038188
5123	8	0.038188
2013	8	0.038188
6704	8	0.038188
8150	8	0.038188
7053	8	0.038188
11778	8	0.038188
8817	8	0.038188
10554	8	0.038188
10568	8	0.038188
1339	8	0.038188
11678	8	0.038188
6984	8	0.038188
10552	8	0.038188
6690	8	0.038188
11759	8	0.038188
10296	7	0.0334145
2854	7	0.0334145
8337	7	0.0334145
8838	7	0.0334145
10507	7	0.0334145
5012	7	0.0334145
8158	7	0.0334145
8314	7	0.0334145
5802	7	0.0334145
2067	7	0.0334145
3060	7	0.0334145
10343	7	0.0334145
10032	7	0.0334145
10548	7	0.0334145
7306	7	0.0334145
1884	7	0.0334145
517	7	0.0334145
1717	7	0.0334145
5449	7	0.0334145
7314	7	0.0334145
10583	7	0.0334145
9484	7	0.0334145
6236	7	0.0334145
1016	7	0.0334145
6305	7	0.0334145
95	7	0.0334145
309	7	0.0334145
9815	7	0.0334145
4941	7	0.0334145
681	7	0.0334145
1553	7	0.0334145
198	7	0.0334145
705	7	0.0334145
1994	7	0.0334145
902	7	0.0334145
1535	7	0.0334145
11732	7	0.0334145
10493	7	0.0334145
33	7	0.0334145
6714	7	0.0334145
10500	7	0.0334145
9810	7	0.0334145
4194	7	0.0334145
1377	7	0.0334145
8138	7	0.0334145
10618	7	0.0334145
9524	7	0.0334145
8328	7	0.0334145
6403	7	0.0334145
4872	7	0.0334145
4873	7	0.0334145
10593	7	0.0334145
10355	7	0.0334145
5676	7	0.0334145
10304	6	0.028641
237	6	0.028641
277	6	0.028641
1131	6	0.028641
10599	6	0.028641
6831	6	0.028641
8821	6	0.028641
1988	6	0.028641
3551	6	0.028641
7689	6	0.028641
5002	6	0.028641
6983	6	0.028641
1263	6	0.028641
5448	6	0.028641
2016	6	0.028641
4412	6	0.028641
5468	6	0.028641
6149	6	0.028641
2758	6	0.028641
5077	6	0.028641
7131	6	0.028641
10592	6	0.028641
10665	6	0.028641
6132	6	0.028641
73	6	0.028641
11683	6	0.028641
5118	6	0.028641
7063	6	0.028641
398	6	0.028641
471	6	0.028641
2290	6	0.028641
724	6	0.028641
10588	6	0.028641
782	6	0.028641
770	6	0.028641
5026	6	0.028641
11075	6	0.028641
1684	6	0.028641
414	6	0.028641
3009	6	0.028641
3017	6	0.028641
9476	6	0.028641
6705	6	0.028641
405	6	0.028641
9325	6	0.028641
5611	6	0.028641
5702	6	0.028641
3135	6	0.028641
6278	6	0.028641
7313	6	0.028641
7604	6	0.028641
5408	6	0.028641
10597	6	0.028641
11767	6	0.028641
8326	6	0.028641
10558	6	0.028641
10577	6	0.028641
10619	6	0.028641
1203	6	0.028641
384	6	0.028641
1583	5	0.0238675
2777	5	0.0238675
11011	5	0.0238675
5604	5	0.0238675
8825	5	0.0238675
16503	5	0.0238675
1756	5	0.0238675
7600	5	0.0238675
5392	5	0.0238675
9552	5	0.0238675
6317	5	0.0238675
2714	5	0.0238675
5578	5	0.0238675
11774	5	0.0238675
5453	5	0.0238675
251	5	0.0238675
638	5	0.0238675
1025	5	0.0238675
585	5	0.0238675
4130	5	0.0238675
1264	5	0.0238675
4832	5	0.0238675
10456	5	0.0238675
5262	5	0.0238675
10589	5	0.0238675
639	5	0.0238675
9661	5	0.0238675
5808	5	0.0238675
13938	5	0.0238675
632	5	0.0238675
4655	5	0.0238675
5122	5	0.0238675
10270	5	0.0238675
5972	5	0.0238675
3406	5	0.0238675
8822	5	0.0238675
11101	5	0.0238675
5009	5	0.0238675
11682	5	0.0238675
60	5	0.0238675
9523	5	0.0238675
416	5	0.0238675
10967	5	0.0238675
4902	5	0.0238675
1662	5	0.0238675
9926	5	0.0238675
11737	5	0.0238675
245	5	0.0238675
395	5	0.0238675
3157	5	0.0238675
1011	5	0.0238675
574	5	0.0238675
4217	5	0.0238675
4404	5	0.0238675
4409	5	0.0238675
5178	5	0.0238675
6173	5	0.0238675
5600	5	0.0238675
6717	5	0.0238675
6393	5	0.0238675
6696	5	0.0238675
9102	5	0.0238675
3265	5	0.0238675
378	5	0.0238675
11718	5	0.0238675
11705	5	0.0238675
8927	5	0.0238675
8949	5	0.0238675
9464	5	0.0238675
2712	5	0.0238675
10527	5	0.0238675
10564	5	0.0238675
5638	5	0.0238675
10595	5	0.0238675
1030	5	0.0238675
10489	5	0.0238675
5225	5	0.0238675
202	4	0.019094
8678	4	0.019094
4768	4	0.019094
402	4	0.019094
7479	4	0.019094
5109	4	0.019094
12474	4	0.019094
5464	4	0.019094
6030	4	0.019094
13887	4	0.019094
13955	4	0.019094
5079	4	0.019094
2344	4	0.019094
1936	4	0.019094
201	4	0.019094
11764	4	0.019094
995	4	0.019094
1348	4	0.019094
1268	4	0.019094
11730	4	0.019094
1902	4	0.019094
10598	4	0.019094
10444	4	0.019094
10576	4	0.019094
1871	4	0.019094
10590	4	0.019094
5613	4	0.019094
553	4	0.019094
3705	4	0.019094
1551	4	0.019094
2912	4	0.019094
11702	4	0.019094
1840	4	0.019094
11921	4	0.019094
671	4	0.019094
166	4	0.019094
8398	4	0.019094
643	4	0.019094
1569	4	0.019094
5435	4	0.019094
10669	4	0.019094
8774	4	0.019094
874	4	0.019094
207	4	0.019094
5097	4	0.019094
2212	4	0.019094
853	4	0.019094
5460	4	0.019094
497	4	0.019094
12493	4	0.019094
5472	4	0.019094
1797	4	0.019094
1337	4	0.019094
7889	4	0.019094
9936	4	0.019094
10068	4	0.019094
10383	4	0.019094
10582	4	0.019094
10801	4	0.019094
1736	4	0.019094
1232	4	0.019094
9492	4	0.019094
10328	4	0.019094
10966	4	0.019094
11009	4	0.019094
6120	4	0.019094
10997	4	0.019094
1118	4	0.019094
4884	4	0.019094
46	4	0.019094
3334	4	0.019094
2346	4	0.019094
51	4	0.019094
244	4	0.019094
350	4	0.019094
459	4	0.019094
1789	4	0.019094
3377	4	0.019094
1294	4	0.019094
1669	4	0.019094
11744	4	0.019094
2315	4	0.019094
2611	4	0.019094
12953	4	0.019094
570	4	0.019094
5136	4	0.019094
10584	4	0.019094
3133	4	0.019094
3140	4	0.019094
190	4	0.019094
4063	4	0.019094
5098	4	0.019094
9470	4	0.019094
10569	4	0.019094
4745	4	0.019094
5475	4	0.019094
5107	4	0.019094
10028	4	0.019094
2040	4	0.019094
5292	4	0.019094
5505	4	0.019094
5527	4	0.019094
11719	4	0.019094
5675	4	0.019094
15253	4	0.019094
4677	4	0.019094
4253	4	0.019094
6202	4	0.019094
6689	4	0.019094
6706	4	0.019094
7048	4	0.019094
1589	4	0.019094
7649	4	0.019094
10633	4	0.019094
5722	4	0.019094
8060	4	0.019094
11769	4	0.019094
11768	4	0.019094
10594	4	0.019094
9526	4	0.019094
10643	4	0.019094
10027	4	0.019094
10311	4	0.019094
10337	4	0.019094
6258	4	0.019094
7903	4	0.019094
10494	4	0.019094
10601	4	0.019094
10629	4	0.019094
6348	4	0.019094
7370	4	0.019094
7445	4	0.019094
9915	4	0.019094
2295	4	0.019094
10750	4	0.019094
11327	4	0.019094
11710	4	0.019094
4407	4	0.019094
2514	3	0.0143205
9356	3	0.0143205
5114	3	0.0143205
3259	3	0.0143205
10451	3	0.0143205
1349	3	0.0143205
10161	3	0.0143205
8197	3	0.0143205
469	3	0.0143205
1150	3	0.0143205
337	3	0.0143205
6980	3	0.0143205
11704	3	0.0143205
9913	3	0.0143205
2345	3	0.0143205
6285	3	0.0143205
10653	3	0.0143205
10604	3	0.0143205
8741	3	0.0143205
550	3	0.0143205
13891	3	0.0143205
13896	3	0.0143205
16506	3	0.0143205
16530	3	0.0143205
9574	3	0.0143205
10992	3	0.0143205
novel-9	3	0.0143205
10406	3	0.0143205
10411	3	0.0143205
1673	3	0.0143205
706	3	0.0143205
8711	3	0.0143205
7142	3	0.0143205
10896	3	0.0143205
9466	3	0.0143205
1368	3	0.0143205
10674	3	0.0143205
3575	3	0.0143205
9529	3	0.0143205
11743	3	0.0143205
11773	3	0.0143205
87	3	0.0143205
10612	3	0.0143205
875	3	0.0143205
1222	3	0.0143205
2331	3	0.0143205
4706	3	0.0143205
110	3	0.0143205
133	3	0.0143205
1516	3	0.0143205
3784	3	0.0143205
5099	3	0.0143205
4036	3	0.0143205
11762	3	0.0143205
2966	3	0.0143205
10364	3	0.0143205
5641	3	0.0143205
7701	3	0.0143205
1765	3	0.0143205
5407	3	0.0143205
11735	3	0.0143205
1925	3	0.0143205
3811	3	0.0143205
1357	3	0.0143205
7432	3	0.0143205
11714	3	0.0143205
2739	3	0.0143205
11090	3	0.0143205
10667	3	0.0143205
10480	3	0.0143205
10608	3	0.0143205
16529	3	0.0143205
10551	3	0.0143205
10586	3	0.0143205
3173	3	0.0143205
6290	3	0.0143205
8771	3	0.0143205
10775	3	0.0143205
4134	3	0.0143205
4488	3	0.0143205
4978	3	0.0143205
71	3	0.0143205
737	3	0.0143205
5463	3	0.0143205
10574	3	0.0143205
5412	3	0.0143205
5027	3	0.0143205
5461	3	0.0143205
292	3	0.0143205
9449	3	0.0143205
5823	3	0.0143205
9444	3	0.0143205
5547	3	0.0143205
2420	3	0.0143205
9280	3	0.0143205
11698	3	0.0143205
10611	3	0.0143205
10647	3	0.0143205
817	3	0.0143205
1054	3	0.0143205
449	3	0.0143205
4047	3	0.0143205
2831	3	0.0143205
2156	3	0.0143205
7460	3	0.0143205
4236	3	0.0143205
11723	3	0.0143205
11765	3	0.0143205
8766	3	0.0143205
751	3	0.0143205
1913	3	0.0143205
2878	3	0.0143205
4878	3	0.0143205
5282	3	0.0143205
793	3	0.0143205
11693	3	0.0143205
2613	3	0.0143205
11454	3	0.0143205
9535	3	0.0143205
13894	3	0.0143205
4424	3	0.0143205
742	3	0.0143205
13911	3	0.0143205
9460	3	0.0143205
10868	3	0.0143205
8840	3	0.0143205
2914	3	0.0143205
554	3	0.0143205
1914	3	0.0143205
1915	3	0.0143205
11687	3	0.0143205
4040	3	0.0143205
690	3	0.0143205
1090	3	0.0143205
12574	3	0.0143205
1470	3	0.0143205
2014	3	0.0143205
1500	3	0.0143205
436	3	0.0143205
628	3	0.0143205
1050	3	0.0143205
4392	3	0.0143205
10605	3	0.0143205
4445	3	0.0143205
4598	3	0.0143205
11901	3	0.0143205
5101	3	0.0143205
5126	3	0.0143205
5349	3	0.0143205
5872	3	0.0143205
5125	3	0.0143205
11618	3	0.0143205
6227	3	0.0143205
5034	3	0.0143205
11749	3	0.0143205
11748	3	0.0143205
2707	3	0.0143205
6022	3	0.0143205
6029	3	0.0143205
6035	3	0.0143205
10035	3	0.0143205
10314	3	0.0143205
6740	3	0.0143205
7026	3	0.0143205
7069	3	0.0143205
7110	3	0.0143205
3518	3	0.0143205
7573	3	0.0143205
7645	3	0.0143205
7647	3	0.0143205
9518	3	0.0143205
10602	3	0.0143205
11724	3	0.0143205
7545	3	0.0143205
10675	3	0.0143205
11712	3	0.0143205
9533	3	0.0143205
9901	3	0.0143205
10286	3	0.0143205
2268	3	0.0143205
10374	3	0.0143205
10448	3	0.0143205
11677	3	0.0143205
6266	3	0.0143205
3751	3	0.0143205
10609	3	0.0143205
10616	3	0.0143205
10626	3	0.0143205
10666	3	0.0143205
10668	3	0.0143205
5639	3	0.0143205
7768	3	0.0143205
7071	3	0.0143205
9933	3	0.0143205
10863	3	0.0143205
10885	3	0.0143205
6372	3	0.0143205
7736	3	0.0143205
2296	3	0.0143205
611	3	0.0143205
342	3	0.0143205
1340	3	0.0143205
11755	3	0.0143205
4142	3	0.0143205
2432	2	0.009547
7991	2	0.009547
10294	2	0.009547
1464	2	0.009547
11396	2	0.009547
1428	2	0.009547
9906	2	0.009547
11696	2	0.009547
12686	2	0.009547
226	2	0.009547
13087	2	0.009547
10149	2	0.009547
2496	2	0.009547
10650	2	0.009547
4104	2	0.009547
3163	2	0.009547
10652	2	0.009547
387	2	0.009547
3476	2	0.009547
11715	2	0.009547
11717	2	0.009547
1445	2	0.009547
11088	2	0.009547
8327	2	0.009547
8334	2	0.009547
12280	2	0.009547
12291	2	0.009547
5116	2	0.009547
12327	2	0.009547
10030	2	0.009547
5440	2	0.009547
12504	2	0.009547
5467	2	0.009547
5471	2	0.009547
7522	2	0.009547
6870	2	0.009547
7566	2	0.009547
2011	2	0.009547
721	2	0.009547
9899	2	0.009547
25	2	0.009547
7633	2	0.009547
13086	2	0.009547
13121	2	0.009547
13124	2	0.009547
9928	2	0.009547
13886	2	0.009547
13922	2	0.009547
13942	2	0.009547
8827	2	0.009547
15088	2	0.009547
2036	2	0.009547
16571	2	0.009547
16578	2	0.009547
16579	2	0.009547
16585	2	0.009547
16587	2	0.009547
16591	2	0.009547
11697	2	0.009547
10636	2	0.009547
10657	2	0.009547
16588	2	0.009547
2540	2	0.009547
1757	2	0.009547
668	2	0.009547
16515	2	0.009547
1527	2	0.009547
4846	2	0.009547
6945	2	0.009547
14094	2	0.009547
3689	2	0.009547
410	2	0.009547
6733	2	0.009547
5281	2	0.009547
10854	2	0.009547
12518	2	0.009547
1358	2	0.009547
702	2	0.009547
10998	2	0.009547
10655	2	0.009547
10632	2	0.009547
10622	2	0.009547
11713	2	0.009547
10513	2	0.009547
10442	2	0.009547
2818	2	0.009547
10610	2	0.009547
11689	2	0.009547
11688	2	0.009547
11740	2	0.009547
10649	2	0.009547
12470	2	0.009547
11775	2	0.009547
8824	2	0.009547
12371	2	0.009547
12370	2	0.009547
88	2	0.009547
206	2	0.009547
485	2	0.009547
10423	2	0.009547
10425	2	0.009547
16424	2	0.009547
9496	2	0.009547
3824	2	0.009547
4661	2	0.009547
2647	2	0.009547
4940	2	0.009547
1033	2	0.009547
1106	2	0.009547
3288	2	0.009547
801	2	0.009547
1116	2	0.009547
3581	2	0.009547
2084	2	0.009547
16572	2	0.009547
9103	2	0.009547
16590	2	0.009547
697	2	0.009547
3524	2	0.009547
4137	2	0.009547
3162	2	0.009547
461	2	0.009547
1497	2	0.009547
4753	2	0.009547
8250	2	0.009547
733	2	0.009547
10341	2	0.009547
10697	2	0.009547
10615	2	0.009547
10679	2	0.009547
11746	2	0.009547
11967	2	0.009547
7702	2	0.009547
10148	2	0.009547
9487	2	0.009547
9937	2	0.009547
8279	2	0.009547
16575	2	0.009547
16592	2	0.009547
16583	2	0.009547
4026	2	0.009547
44	2	0.009547
8488	2	0.009547
1556	2	0.009547
165	2	0.009547
4612	2	0.009547
11772	2	0.009547
11111	2	0.009547
10670	2	0.009547
10635	2	0.009547
11113	2	0.009547
2795	2	0.009547
10673	2	0.009547
994	2	0.009547
16586	2	0.009547
9811	2	0.009547
10972	2	0.009547
10555	2	0.009547
10549	2	0.009547
4900	2	0.009547
12182	2	0.009547
11081	2	0.009547
11739	2	0.009547
11753	2	0.009547
11751	2	0.009547
13889	2	0.009547
5293	2	0.009547
11695	2	0.009547
10788	2	0.009547
2832	2	0.009547
8000	2	0.009547
12487	2	0.009547
5660	2	0.009547
5581	2	0.009547
6139	2	0.009547
6172	2	0.009547
10573	2	0.009547
10557	2	0.009547
10563	2	0.009547
10289	2	0.009547
10320	2	0.009547
1518	2	0.009547
7141	2	0.009547
3822	2	0.009547
5679	2	0.009547
1041	2	0.009547
7441	2	0.009547
5466	2	0.009547
7538	2	0.009547
6044	2	0.009547
1901	2	0.009547
9168	2	0.009547
1955	2	0.009547
9197	2	0.009547
8640	2	0.009547
10688	2	0.009547
6530	2	0.009547
10895	2	0.009547
4221	2	0.009547
10031	2	0.009547
6702	2	0.009547
10470	2	0.009547
10476	2	0.009547
10478	2	0.009547
10389	2	0.009547
10567	2	0.009547
5656	2	0.009547
9817	2	0.009547
542	2	0.009547
7262	2	0.009547
8681	2	0.009547
11699	2	0.009547
10623	2	0.009547
10676	2	0.009547
4090	2	0.009547
10740	2	0.009547
8776	2	0.009547
897	2	0.009547
11093	2	0.009547
11731	2	0.009547
9809	2	0.009547
8152	2	0.009547
94	2	0.009547
145	2	0.009547
10631	2	0.009547
1661	2	0.009547
11709	2	0.009547
93	2	0.009547
641	2	0.009547
11237	2	0.009547
2794	2	0.009547
4393	2	0.009547
13120	2	0.009547
4394	2	0.009547
10280	2	0.009547
11028	2	0.009547
10485	2	0.009547
10644	2	0.009547
11103	2	0.009547
10880	2	0.009547
10656	2	0.009547
8690	2	0.009547
3276	2	0.009547
16589	2	0.009547
3000	2	0.009547
2880	2	0.009547
10627	2	0.009547
1141	2	0.009547
2764	2	0.009547
5422	2	0.009547
2234	2	0.009547
12253	2	0.009547
16616	2	0.009547
766	2	0.009547
4913	2	0.009547
3499	2	0.009547
1591	2	0.009547
282	2	0.009547
13898	2	0.009547
11945	2	0.009547
1045	2	0.009547
2881	2	0.009547
16580	2	0.009547
16584	2	0.009547
16505	2	0.009547
16573	2	0.009547
16576	2	0.009547
1159	2	0.009547
16582	2	0.009547
1	2	0.009547
9536	2	0.009547
12351	2	0.009547
70	2	0.009547
225	2	0.009547
228	2	0.009547
373	2	0.009547
10391	2	0.009547
14702	2	0.009547
8027	2	0.009547
422	2	0.009547
499	2	0.009547
620	2	0.009547
11041	2	0.009547
861	2	0.009547
5187	2	0.009547
16569	2	0.009547
10453	2	0.009547
10479	2	0.009547
1111	2	0.009547
3358	2	0.009547
1014	2	0.009547
12342	2	0.009547
9544	2	0.009547
4187	2	0.009547
11780	2	0.009547
8798	2	0.009547
1186	2	0.009547
16570	2	0.009547
16574	2	0.009547
11738	2	0.009547
1746	2	0.009547
1801	2	0.009547
1862	2	0.009547
10761	2	0.009547
2104	2	0.009547
2160	2	0.009547
2258	2	0.009547
5094	2	0.009547
4219	2	0.009547
2557	2	0.009547
13915	2	0.009547
2894	2	0.009547
2929	2	0.009547
3460	2	0.009547
4767	2	0.009547
13181	2	0.009547
9579	2	0.009547
992	2	0.009547
355	2	0.009547
12251	2	0.009547
11063	2	0.009547
1389	2	0.009547
9749	2	0.009547
945	2	0.009547
11686	2	0.009547
11692	2	0.009547
739	2	0.009547
4225	2	0.009547
4350	2	0.009547
6698	2	0.009547
12844	2	0.009547
12162	2	0.009547
4448	2	0.009547
4453	2	0.009547
13118	2	0.009547
4826	2	0.009547
4840	2	0.009547
10663	2	0.009547
4848	2	0.009547
5104	2	0.009547
5106	2	0.009547
10398	2	0.009547
5179	2	0.009547
5258	2	0.009547
5279	2	0.009547
5406	2	0.009547
10292	2	0.009547
6697	2	0.009547
5462	2	0.009547
5469	2	0.009547
5474	2	0.009547
5537	2	0.009547
5542	2	0.009547
5577	2	0.009547
5612	2	0.009547
5623	2	0.009547
2365	2	0.009547
5847	2	0.009547
3936	2	0.009547
5033	2	0.009547
11106	2	0.009547
11052	2	0.009547
10879	2	0.009547
5567	2	0.009547
6353	2	0.009547
12819	2	0.009547
7229	2	0.009547
5893	2	0.009547
6542	2	0.009547
656	2	0.009547
129	2	0.009547
11176	2	0.009547
6179	2	0.009547
6189	2	0.009547
11708	2	0.009547
6930	2	0.009547
4319	2	0.009547
2469	2	0.009547
11728	2	0.009547
7194	2	0.009547
11882	2	0.009547
7336	2	0.009547
7345	2	0.009547
7416	2	0.009547
7424	2	0.009547
7425	2	0.009547
16507	2	0.009547
10658	2	0.009547
7438	2	0.009547
7518	2	0.009547
11742	2	0.009547
10645	2	0.009547
7596	2	0.009547
7599	2	0.009547
7369	2	0.009547
7648	2	0.009547
7653	2	0.009547
7672	2	0.009547
10874	2	0.009547
12324	2	0.009547
12179	2	0.009547
12315	2	0.009547
12313	2	0.009547
10654	2	0.009547
1735	2	0.009547
11703	2	0.009547
8267	2	0.009547
8330	2	0.009547
8595	2	0.009547
8676	2	0.009547
11332	2	0.009547
9300	2	0.009547
9355	2	0.009547
9443	2	0.009547
9445	2	0.009547
9446	2	0.009547
9459	2	0.009547
9468	2	0.009547
9471	2	0.009547
9537	2	0.009547
9545	2	0.009547
10678	2	0.009547
10648	2	0.009547
5898	2	0.009547
10056	2	0.009547
10065	2	0.009547
10278	2	0.009547
10283	2	0.009547
10317	2	0.009547
2270	2	0.009547
10352	2	0.009547
10414	2	0.009547
11085	2	0.009547
6262	2	0.009547
4869	2	0.009547
6255	2	0.009547
7895	2	0.009547
10634	2	0.009547
10474	2	0.009547
6361	2	0.009547
10606	2	0.009547
4640	2	0.009547
10617	2	0.009547
10639	2	0.009547
10640	2	0.009547
6148	2	0.009547
10641	2	0.009547
10642	2	0.009547
10651	2	0.009547
10660	2	0.009547
10662	2	0.009547
10672	2	0.009547
10680	2	0.009547
5637	2	0.009547
10702	2	0.009547
9765	2	0.009547
8914	2	0.009547
7376	2	0.009547
7443	2	0.009547
7444	2	0.009547
10851	2	0.009547
9506	2	0.009547
8696	2	0.009547
10664	2	0.009547
10671	2	0.009547
7310	2	0.009547
11757	2	0.009547
10897	2	0.009547
10899	2	0.009547
11012	2	0.009547
1835	2	0.009547
11013	2	0.009547
11014	2	0.009547
11015	2	0.009547
11057	2	0.009547
11655	2	0.009547
11681	2	0.009547
11684	2	0.009547
11694	2	0.009547
11727	2	0.009547
11729	2	0.009547
11733	2	0.009547
11734	2	0.009547
11750	2	0.009547
10326	2	0.009547
10334	2	0.009547
11760	2	0.009547
11771	2	0.009547
11781	2	0.009547
11782	2	0.009547
11799	2	0.009547
4384	2	0.009547
2476	1	0.0047735
8014	1	0.0047735
2393	1	0.0047735
1392	1	0.0047735
926	1	0.0047735
2347	1	0.0047735
2383	1	0.0047735
635	1	0.0047735
3292	1	0.0047735
1941	1	0.0047735
986	1	0.0047735
8487	1	0.0047735
1943	1	0.0047735
1945	1	0.0047735
2116	1	0.0047735
351	1	0.0047735
8486	1	0.0047735
283	1	0.0047735
10017	1	0.0047735
2697	1	0.0047735
2812	1	0.0047735
10223	1	0.0047735
13106	1	0.0047735
12712	1	0.0047735
10143	1	0.0047735
12709	1	0.0047735
10829	1	0.0047735
2920	1	0.0047735
5459	1	0.0047735
12526	1	0.0047735
2706	1	0.0047735
12728	1	0.0047735
9744	1	0.0047735
12617	1	0.0047735
12134	1	0.0047735
12586	1	0.0047735
11129	1	0.0047735
12730	1	0.0047735
12136	1	0.0047735
4251	1	0.0047735
1412	1	0.0047735
12533	1	0.0047735
12534	1	0.0047735
7915	1	0.0047735
12706	1	0.0047735
12536	1	0.0047735
12537	1	0.0047735
6141	1	0.0047735
6844	1	0.0047735
3791	1	0.0047735
12186	1	0.0047735
13934	1	0.0047735
12822	1	0.0047735
12825	1	0.0047735
12827	1	0.0047735
2998	1	0.0047735
5053	1	0.0047735
652	1	0.0047735
12560	1	0.0047735
10822	1	0.0047735
1937	1	0.0047735
12308	1	0.0047735
10825	1	0.0047735
12189	1	0.0047735
1396	1	0.0047735
13948	1	0.0047735
novel-7	1	0.0047735
268	1	0.0047735
10417	1	0.0047735
7151	1	0.0047735
10462	1	0.0047735
16504	1	0.0047735
16329	1	0.0047735
16617	1	0.0047735
9499	1	0.0047735
4020	1	0.0047735
12525	1	0.0047735
12760	1	0.0047735
12541	1	0.0047735
12783	1	0.0047735
6849	1	0.0047735
12761	1	0.0047735
4241	1	0.0047735
11040	1	0.0047735
10744	1	0.0047735
7480	1	0.0047735
10817	1	0.0047735
12126	1	0.0047735
12763	1	0.0047735
12718	1	0.0047735
10809	1	0.0047735
10732	1	0.0047735
10767	1	0.0047735
663	1	0.0047735
13916	1	0.0047735
6140	1	0.0047735
10150	1	0.0047735
5814	1	0.0047735
4293	1	0.0047735
13873	1	0.0047735
2372	1	0.0047735
12352	1	0.0047735
11899	1	0.0047735
5242	1	0.0047735
12835	1	0.0047735
12593	1	0.0047735
12594	1	0.0047735
12164	1	0.0047735
2904	1	0.0047735
2464	1	0.0047735
12329	1	0.0047735
12580	1	0.0047735
12742	1	0.0047735
10533	1	0.0047735
1944	1	0.0047735
8716	1	0.0047735
12562	1	0.0047735
10859	1	0.0047735
10738	1	0.0047735
11092	1	0.0047735
10796	1	0.0047735
12147	1	0.0047735
11056	1	0.0047735
9911	1	0.0047735
8299	1	0.0047735
9932	1	0.0047735
6344	1	0.0047735
10816	1	0.0047735
10818	1	0.0047735
11069	1	0.0047735
240	1	0.0047735
12347	1	0.0047735
880	1	0.0047735
1444	1	0.0047735
12612	1	0.0047735
805	1	0.0047735
10936	1	0.0047735
12405	1	0.0047735
12788	1	0.0047735
12791	1	0.0047735
12806	1	0.0047735
5063	1	0.0047735
12149	1	0.0047735
12157	1	0.0047735
12159	1	0.0047735
12171	1	0.0047735
12172	1	0.0047735
12181	1	0.0047735
12185	1	0.0047735
12188	1	0.0047735
12202	1	0.0047735
12204	1	0.0047735
28	1	0.0047735
11915	1	0.0047735
5067	1	0.0047735
12951	1	0.0047735
12236	1	0.0047735
12278	1	0.0047735
12283	1	0.0047735
12284	1	0.0047735
12306	1	0.0047735
12314	1	0.0047735
12317	1	0.0047735
12320	1	0.0047735
5105	1	0.0047735
10059	1	0.0047735
12323	1	0.0047735
12325	1	0.0047735
12334	1	0.0047735
12335	1	0.0047735
12338	1	0.0047735
12345	1	0.0047735
12348	1	0.0047735
12349	1	0.0047735
12353	1	0.0047735
5124	1	0.0047735
12356	1	0.0047735
12361	1	0.0047735
12372	1	0.0047735
12377	1	0.0047735
12400	1	0.0047735
12402	1	0.0047735
12403	1	0.0047735
12467	1	0.0047735
12471	1	0.0047735
16248	1	0.0047735
12368	1	0.0047735
12203	1	0.0047735
12475	1	0.0047735
12482	1	0.0047735
12483	1	0.0047735
12486	1	0.0047735
12488	1	0.0047735
12489	1	0.0047735
12491	1	0.0047735
12501	1	0.0047735
12511	1	0.0047735
5619	1	0.0047735
6731	1	0.0047735
12512	1	0.0047735
12514	1	0.0047735
12517	1	0.0047735
12519	1	0.0047735
12522	1	0.0047735
12524	1	0.0047735
12529	1	0.0047735
12531	1	0.0047735
12540	1	0.0047735
12557	1	0.0047735
12587	1	0.0047735
10585	1	0.0047735
2650	1	0.0047735
12558	1	0.0047735
12563	1	0.0047735
12569	1	0.0047735
12570	1	0.0047735
12572	1	0.0047735
12578	1	0.0047735
12589	1	0.0047735
12590	1	0.0047735
12604	1	0.0047735
12605	1	0.0047735
6829	1	0.0047735
12615	1	0.0047735
12608	1	0.0047735
12613	1	0.0047735
12672	1	0.0047735
12682	1	0.0047735
12700	1	0.0047735
12703	1	0.0047735
12704	1	0.0047735
12707	1	0.0047735
12713	1	0.0047735
12715	1	0.0047735
10754	1	0.0047735
13910	1	0.0047735
12716	1	0.0047735
12722	1	0.0047735
12723	1	0.0047735
12727	1	0.0047735
12732	1	0.0047735
12739	1	0.0047735
12741	1	0.0047735
12750	1	0.0047735
12751	1	0.0047735
12752	1	0.0047735
10379	1	0.0047735
7567	1	0.0047735
12375	1	0.0047735
12784	1	0.0047735
12786	1	0.0047735
12789	1	0.0047735
12790	1	0.0047735
12792	1	0.0047735
12795	1	0.0047735
12796	1	0.0047735
12798	1	0.0047735
12801	1	0.0047735
12802	1	0.0047735
1592	1	0.0047735
7448	1	0.0047735
6144	1	0.0047735
9054	1	0.0047735
9898	1	0.0047735
11675	1	0.0047735
16	1	0.0047735
12552	1	0.0047735
12699	1	0.0047735
10747	1	0.0047735
4191	1	0.0047735
10814	1	0.0047735
12232	1	0.0047735
8753	1	0.0047735
984	1	0.0047735
13931	1	0.0047735
24	1	0.0047735
1815	1	0.0047735
10705	1	0.0047735
13332	1	0.0047735
12851	1	0.0047735
12242	1	0.0047735
1006	1	0.0047735
622	1	0.0047735
novel-1	1	0.0047735
novel-18	1	0.0047735
7632	1	0.0047735
7631	1	0.0047735
12807	1	0.0047735
12808	1	0.0047735
12810	1	0.0047735
12811	1	0.0047735
12815	1	0.0047735
12818	1	0.0047735
12820	1	0.0047735
12841	1	0.0047735
13025	1	0.0047735
13081	1	0.0047735
7707	1	0.0047735
7706	1	0.0047735
11102	1	0.0047735
12577	1	0.0047735
13117	1	0.0047735
13646	1	0.0047735
13867	1	0.0047735
13870	1	0.0047735
13875	1	0.0047735
13876	1	0.0047735
13879	1	0.0047735
13884	1	0.0047735
10703	1	0.0047735
7860	1	0.0047735
8660	1	0.0047735
11118	1	0.0047735
13892	1	0.0047735
13897	1	0.0047735
13899	1	0.0047735
13900	1	0.0047735
13902	1	0.0047735
13909	1	0.0047735
10978	1	0.0047735
12282	1	0.0047735
10938	1	0.0047735
13918	1	0.0047735
13919	1	0.0047735
13920	1	0.0047735
13924	1	0.0047735
13929	1	0.0047735
13943	1	0.0047735
13946	1	0.0047735
13949	1	0.0047735
12530	1	0.0047735
12258	1	0.0047735
10787	1	0.0047735
14184	1	0.0047735
14216	1	0.0047735
14683	1	0.0047735
15536	1	0.0047735
15701	1	0.0047735
16327	1	0.0047735
16425	1	0.0047735
11000	1	0.0047735
11024	1	0.0047735
9438	1	0.0047735
10839	1	0.0047735
16526	1	0.0047735
17281	1	0.0047735
17284	1	0.0047735
novel-2	1	0.0047735
novel-3	1	0.0047735
novel-5	1	0.0047735
novel-8	1	0.0047735
novel-17	1	0.0047735
10410	1	0.0047735
16528	1	0.0047735
10638	1	0.0047735
12233	1	0.0047735
11098	1	0.0047735
10961	1	0.0047735
10416	1	0.0047735
1938	1	0.0047735
1935	1	0.0047735
2472	1	0.0047735
12731	1	0.0047735
419	1	0.0047735
13111	1	0.0047735
2269	1	0.0047735
4018	1	0.0047735
8917	1	0.0047735
8712	1	0.0047735
11797	1	0.0047735
3934	1	0.0047735
2154	1	0.0047735
8290	1	0.0047735
645	1	0.0047735
12729	1	0.0047735
12711	1	0.0047735
9763	1	0.0047735
12376	1	0.0047735
1200	1	0.0047735
2081	1	0.0047735
10908	1	0.0047735
10805	1	0.0047735
10778	1	0.0047735
10956	1	0.0047735
10826	1	0.0047735
12344	1	0.0047735
12244	1	0.0047735
10224	1	0.0047735
10170	1	0.0047735
10808	1	0.0047735
13866	1	0.0047735
6145	1	0.0047735
13914	1	0.0047735
1820	1	0.0047735
4269	1	0.0047735
13895	1	0.0047735
3083	1	0.0047735
3263	1	0.0047735
16328	1	0.0047735
10439	1	0.0047735
12187	1	0.0047735
2685	1	0.0047735
6966	1	0.0047735
10227	1	0.0047735
4021	1	0.0047735
4321	1	0.0047735
7436	1	0.0047735
11003	1	0.0047735
11023	1	0.0047735
3065	1	0.0047735
11031	1	0.0047735
7619	1	0.0047735
9516	1	0.0047735
10951	1	0.0047735
6444	1	0.0047735
11920	1	0.0047735
7435	1	0.0047735
13871	1	0.0047735
1228	1	0.0047735
12838	1	0.0047735
2575	1	0.0047735
5848	1	0.0047735
889	1	0.0047735
novel-15	1	0.0047735
13923	1	0.0047735
5316	1	0.0047735
7651	1	0.0047735
10876	1	0.0047735
3557	1	0.0047735
12127	1	0.0047735
12614	1	0.0047735
7412	1	0.0047735
13951	1	0.0047735
12190	1	0.0047735
11002	1	0.0047735
10873	1	0.0047735
7674	1	0.0047735
11044	1	0.0047735
12544	1	0.0047735
8316	1	0.0047735
12596	1	0.0047735
10721	1	0.0047735
9975	1	0.0047735
11922	1	0.0047735
8812	1	0.0047735
13880	1	0.0047735
2715	1	0.0047735
11086	1	0.0047735
12130	1	0.0047735
10941	1	0.0047735
10794	1	0.0047735
12585	1	0.0047735
10943	1	0.0047735
10798	1	0.0047735
10536	1	0.0047735
12598	1	0.0047735
11747	1	0.0047735
12609	1	0.0047735
12601	1	0.0047735
9547	1	0.0047735
12740	1	0.0047735
9548	1	0.0047735
10932	1	0.0047735
10933	1	0.0047735
10935	1	0.0047735
12339	1	0.0047735
12332	1	0.0047735
12183	1	0.0047735
10842	1	0.0047735
11126	1	0.0047735
9234	1	0.0047735
9465	1	0.0047735
12354	1	0.0047735
9480	1	0.0047735
10146	1	0.0047735
novel-11	1	0.0047735
16508	1	0.0047735
10979	1	0.0047735
10776	1	0.0047735
10907	1	0.0047735
10613	1	0.0047735
12800	1	0.0047735
10947	1	0.0047735
12695	1	0.0047735
12546	1	0.0047735
11046	1	0.0047735
11104	1	0.0047735
12556	1	0.0047735
12333	1	0.0047735
12150	1	0.0047735
12165	1	0.0047735
12781	1	0.0047735
10996	1	0.0047735
5044	1	0.0047735
5191	1	0.0047735
10716	1	0.0047735
12535	1	0.0047735
10823	1	0.0047735
10777	1	0.0047735
12689	1	0.0047735
10866	1	0.0047735
10977	1	0.0047735
12124	1	0.0047735
12279	1	0.0047735
12276	1	0.0047735
12230	1	0.0047735
12243	1	0.0047735
12176	1	0.0047735
89	1	0.0047735
1903	1	0.0047735
2956	1	0.0047735
546	1	0.0047735
11796	1	0.0047735
12304	1	0.0047735
5492	1	0.0047735
10901	1	0.0047735
10682	1	0.0047735
10596	1	0.0047735
5719	1	0.0047735
13937	1	0.0047735
3531	1	0.0047735
13912	1	0.0047735
12322	1	0.0047735
10881	1	0.0047735
914	1	0.0047735
12702	1	0.0047735
1153	1	0.0047735
8609	1	0.0047735
1156	1	0.0047735
10916	1	0.0047735
2017	1	0.0047735
[truncated: 1,270 more rows]

## Sheet: Table S7
Table S7 The correspondence between serotypes and STs
Strain	Serotype by Pneumo-Typer	Recorded serotype	ST	cgST
GCA_900048875.1	1	1	217	Unknown/Novel
GCA_900061925.1	1	1	217	Unknown/Novel
GCA_001098885.1	1	1	217	Unknown/Novel
GCA_001100805.1	1	1	217	1083
GCA_001150645.1	1	1	217	1087
GCA_001157585.1	1	1	217	1084
GCA_001191775.1	1	1	217	1085
GCA_900043785.1	1	1	306	Unknown/Novel
GCA_900048865.1	1	1	11745	4644
GCA_900050465.1	1	1	217	Unknown/Novel
GCA_900050475.1	1	1	11745	Unknown/Novel
GCA_900050925.1	1	1	217	3847
GCA_900050935.1	1	1	217	Unknown/Novel
GCA_900051305.1	1	1	217	Unknown/Novel
GCA_900051315.1	1	1	217	26484
GCA_900052565.1	1	1	217	Unknown/Novel
GCA_900053525.2	1	1	227	21029
GCA_900053825.1	1	1	217	Unknown/Novel
GCA_900055555.1	1	1	217	Unknown/Novel
GCA_900056895.1	1	1	217	Unknown/Novel
GCA_900061915.1	1	1	217	3934
GCA_900692485.1	1	1	227	21033
GCA_901212845.1	1	1	217	Unknown/Novel
GCA_901213385.1	1	1	227	Unknown/Novel
GCA_901213535.1	1	1	11745	26769
GCA_901214105.1	1	1	217	Unknown/Novel
GCA_901215095.1	1	1	217	Unknown/Novel
GCA_901218515.1	1	1	612	15515
GCA_901219005.1	1	1	303	Unknown/Novel
GCA_901219115.1	1	1	5002	Unknown/Novel
GCA_901222055.1	1	1	612	Unknown/Novel
GCA_901222265.1	1	1	303	Unknown/Novel
GCA_901222575.1	1	1	3081	Unknown/Novel
GCA_901223275.1	1	1	306	25527
GCA_901228405.1	1	1	303	26599
GCA_901228775.1	1	1	303	26600
GCA_901230165.1	1	1	217	Unknown/Novel
GCA_901232895.1	1	1	11740	Unknown/Novel
GCA_901235645.1	1	1	306	25523
GCA_901237105.1	1	1	612	16209
GCA_901237995.1	1	1	227	21028
GCA_901238315.1	1	1	227	Unknown/Novel
GCA_901241225.1	1	1	227	21027
GCA_901242675.1	1	1	217	15786
GCA_901243745.1	1	1	227	21020
GCA_901246785.1	1	1	306	Unknown/Novel
GCA_901246935.1	1	1	227	21021
GCA_901252245.1	1	1	3081	26711
GCA_901255015.1	1	1	306	27448
GCA_901258325.1	1	1	217	Unknown/Novel
GCA_901258435.1	1	1	227	21019
GCA_901261725.1	1	1	227	21024
GCA_901261915.1	1	1	304	Unknown/Novel
GCA_901264745.1	1	1	3081	Unknown/Novel
GCA_901265265.1	1	1	3575	Unknown/Novel
GCA_901268365.1	1	1	10649	26756
GCA_901269735.1	1	1	217	Unknown/Novel
GCA_901270275.1	1	1	10649	26755
GCA_901270825.1	1	1	217	Unknown/Novel
GCA_901272825.1	1	1	306	24072
GCA_901274285.1	1	1	8314	16623
GCA_901275395.1	1	1	217	Unknown/Novel
GCA_901277235.1	1	1	217	26534
GCA_901278095.1	1	1	217	Unknown/Novel
GCA_901278175.1	1	1	3081	26676
GCA_901278235.1	1	1	217	26532
GCA_901279325.1	1	1	3081	26674
GCA_901279515.1	1	1	217	26530
GCA_901280045.1	1	1	2084	Unknown/Novel
GCA_901280505.1	1	1	303	Unknown/Novel
GCA_901281375.1	1	1	217	Unknown/Novel
GCA_901283915.1	1	1	303	26594
GCA_901284765.1	1	1	306	25529
GCA_901284785.1	1	1	306	25530
GCA_901285965.1	1	1	304	22777
GCA_901286895.1	1	1	304	22767
GCA_901287005.1	1	1	5784	22810
GCA_901288515.1	1	1	304	22759
GCA_901288725.1	1	1	5784	22808
GCA_901288935.1	1	1	306	25538
GCA_901289165.1	1	1	13923	22821
GCA_901289195.1	1	1	304	22764
GCA_901289315.1	1	1	304	22763
GCA_901289705.1	1	1	306	25540
GCA_901290025.1	1	1	306	25539
GCA_901290735.1	1	1	304	22795
GCA_901291475.1	1	1	306	25544
GCA_901292475.1	1	1	304	22794
GCA_901294015.1	1	1	12470	Unknown/Novel
GCA_901294505.1	1	1	12470	Unknown/Novel
GCA_901294985.1	1	1	227	21017
GCA_901296035.1	1	1	306	25534
GCA_901296265.1	1	1	304	22786
GCA_901296685.1	1	1	304	22785
GCA_901296725.1	1	1	5784	22817
GCA_901297365.1	1	1	304	22784
GCA_901297735.1	1	1	304	22783
GCA_901299145.1	1	1	2296	24519
GCA_901301185.1	1	1	306	25535
GCA_901304065.1	1	1	306	25537
GCA_901304665.1	1	1	306	25536
GCA_901307125.1	1	1	2084	23324
GCA_901309005.1	1	1	227	Unknown/Novel
GCA_901310355.1	1	1	5784	22820
GCA_901311165.1	1	1	304	22801
GCA_901312505.1	1	1	304	22798
GCA_901313075.1	1	1	306	25543
GCA_901313195.1	1	1	306	25542
GCA_901313265.1	1	1	304	22800
GCA_901313295.1	1	1	306	25532
GCA_901313825.1	1	1	306	25541
GCA_901313875.1	1	1	304	22802
GCA_901314525.1	1	1	306	25531
GCA_901314845.1	1	1	304	22799
GCA_901316085.1	1	1	304	22782
GCA_901316115.1	1	1	304	22804
GCA_901316755.1	1	1	304	22803
GCA_901318245.1	1	1	217	Unknown/Novel
GCA_901318325.1	1	1	5784	22814
GCA_901318995.1	1	1	304	22797
GCA_901322595.1	1	1	303	Unknown/Novel
GCA_901326075.1	1	1	304	22774
GCA_901328215.1	1	1	304	22793
GCA_901328475.1	1	1	304	22792
GCA_901328545.1	1	1	304	22780
GCA_901328825.1	1	1	304	22791
GCA_901330875.1	1	1	304	22773
GCA_901330925.1	1	1	5316	Unknown/Novel
GCA_901331155.1	1	1	304	22790
GCA_901331335.1	1	1	304	22772
GCA_901331445.1	1	1	304	22771
GCA_901331645.1	1	1	304	22770
GCA_901331935.1	1	1	5784	22811
GCA_901333015.1	1	1	304	22768
GCA_901333195.1	1	1	304	22787
GCA_901336395.1	1	1	217	Unknown/Novel
GCA_901337025.1	1	1	304	22762
GCA_901337245.1	1	1	304	22761
GCA_901339455.1	1	1	217	16749
GCA_901341385.1	1	1	304	22778
GCA_902652835.1	1	1	227	35501
GCA_902652845.1	1	1	227	35503
GCA_902652855.1	1	1	306	35506
GCA_902652865.1	1	1	227	35499
GCA_902652875.1	1	1	227	35508
GCA_902652905.1	1	1	227	35509
GCA_902652935.1	1	1	4288	35500
GCA_902652965.1	1	1	227	35494
GCA_902652975.1	1	1	306	35507
GCA_900048105.1	1	1	Unknown	Unknown/Novel
GCA_900050485.1	1	1	217	Unknown/Novel
GCA_901247675.1	1	1	217	Unknown/Novel
GCA_901277695.1	1	1	217	15835
GCA_001457635.1	1	1	615	12295
GCA_900043735.2	1	1	227	21031
GCA_900043805.2	1	1	2296	Unknown/Novel
GCA_900048855.1	1	1	217	3156
GCA_900049695.1	1	1	217	3843
GCA_900049705.1	1	1	217	26513
GCA_900050075.1	1	1	303	3137
GCA_900050085.1	1	1	217	Unknown/Novel
GCA_900050095.1	1	1	217	Unknown/Novel
GCA_900050495.1	1	1	11745	3882
GCA_900050945.1	1	1	217	Unknown/Novel
GCA_900051325.1	1	1	217	Unknown/Novel
GCA_900052545.1	1	1	217	Unknown/Novel
GCA_900052555.1	1	1	11745	Unknown/Novel
GCA_900052875.1	1	1	217	Unknown/Novel
GCA_900053245.1	1	1	11745	Unknown/Novel
GCA_900053815.1	1	1	217	Unknown/Novel
GCA_900054885.1	1	1	217	Unknown/Novel
GCA_900055165.1	1	1	217	3787
GCA_900055175.1	1	1	217	4642
GCA_900055545.1	1	1	217	Unknown/Novel
GCA_900055915.1	1	1	217	Unknown/Novel
GCA_900059225.1	1	1	217	Unknown/Novel
GCA_900059235.1	1	1	217	Unknown/Novel
GCA_900060685.1	1	1	11745	3992
GCA_900061085.1	1	1	217	3979
GCA_900063675.1	1	1	11745	3889
GCA_900063685.1	1	1	303	Unknown/Novel
GCA_900063695.1	1	1	8158	3896
GCA_900063705.1	1	1	217	5239
GCA_900063715.1	1	1	217	Unknown/Novel
GCA_900065105.1	1	1	217	Unknown/Novel
GCA_900065115.1	1	1	217	Unknown/Novel
GCA_900065285.1	1	1	11745	3153
GCA_900065835.1	1	1	217	3925
GCA_900193315.1	1	1	227	Unknown/Novel
GCA_900618545.1	1	1	3018	Unknown/Novel
GCA_901212825.1	1	1	217	Unknown/Novel
GCA_901212875.1	1	1	217	26545
GCA_901212905.1	1	1	217	Unknown/Novel
GCA_901213215.1	1	1	217	Unknown/Novel
GCA_901213485.1	1	1	217	15427
GCA_901213505.1	1	1	217	26544
GCA_901213555.1	1	1	217	Unknown/Novel
GCA_901213725.1	1	1	618	Unknown/Novel
GCA_901213795.1	1	1	3081	Unknown/Novel
GCA_901213815.1	1	1	612	Unknown/Novel
GCA_901213825.1	1	1	618	Unknown/Novel
GCA_901213875.1	1	1	618	31165
GCA_901213905.1	1	1	618	Unknown/Novel
GCA_901213925.1	1	1	618	23301
GCA_901213965.1	1	1	618	Unknown/Novel
GCA_901214205.1	1	1	618	23293
GCA_901214375.1	1	1	618	Unknown/Novel
GCA_901214415.1	1	1	3579	20949
GCA_901214465.1	1	1	618	Unknown/Novel
GCA_901214655.1	1	1	618	Unknown/Novel
GCA_901214785.1	1	1	217	Unknown/Novel
GCA_901214955.1	1	1	217	26349
GCA_901215025.1	1	1	9529	26752
GCA_901215065.1	1	1	217	26348
GCA_901215515.1	1	1	217	26347
GCA_901215805.1	1	1	217	Unknown/Novel
GCA_901215835.1	1	1	612	15467
GCA_901215985.1	1	1	217	38631
GCA_901216115.1	1	1	217	26346
GCA_901216295.1	1	1	217	26345
GCA_901216355.1	1	1	217	Unknown/Novel
GCA_901216525.1	1	1	217	26344
GCA_901216555.1	1	1	217	26343
GCA_901216575.1	1	1	217	Unknown/Novel
GCA_901216615.1	1	1	11745	26763
GCA_901216625.1	1	1	217	26539
GCA_901216775.1	1	1	217	Unknown/Novel
GCA_901217035.1	1	1	11745	26762
GCA_901217235.1	1	1	217	26342
GCA_901217255.1	1	1	217	Unknown/Novel
GCA_901217285.1	1	1	618	Unknown/Novel
GCA_901217335.1	1	1	217	Unknown/Novel
GCA_901217545.1	1	1	217	15497
GCA_901217765.1	1	1	217	Unknown/Novel
GCA_901218365.1	1	1	217	Unknown/Novel
GCA_901218565.1	1	1	612	Unknown/Novel
GCA_901218825.1	1	1	303	Unknown/Novel
GCA_901218905.1	1	1	303	Unknown/Novel
GCA_901219015.1	1	1	303	Unknown/Novel
GCA_901219205.1	1	1	303	Unknown/Novel
GCA_901219295.1	1	1	303	Unknown/Novel
GCA_901219665.1	1	1	217	Unknown/Novel
GCA_901220285.1	1	1	217	Unknown/Novel
GCA_901220345.1	1	1	217	Unknown/Novel
GCA_901220665.1	1	1	217	15755
GCA_901220815.1	1	1	612	15532
GCA_901220855.1	1	1	217	Unknown/Novel
GCA_901221075.1	1	1	217	Unknown/Novel
GCA_901221125.1	1	1	612	Unknown/Novel
GCA_901221195.1	1	1	612	Unknown/Novel
GCA_901221285.1	1	1	303	26568
GCA_901221395.1	1	1	612	Unknown/Novel
GCA_901221505.1	1	1	217	Unknown/Novel
GCA_901221855.1	1	1	8314	16777
GCA_901222325.1	1	1	217	Unknown/Novel
GCA_901222415.1	1	1	618	31159
GCA_901222475.1	1	1	217	Unknown/Novel
GCA_901222505.1	1	1	217	Unknown/Novel
GCA_901222605.1	1	1	618	Unknown/Novel
GCA_901222645.1	1	1	217	Unknown/Novel
GCA_901222655.1	1	1	217	Unknown/Novel
GCA_901222915.1	1	1	3575	26341
GCA_901223005.1	1	1	217	Unknown/Novel
GCA_901223085.1	1	1	9067	Unknown/Novel
GCA_901223265.1	1	1	217	16162
GCA_901223285.1	1	1	618	Unknown/Novel
GCA_901223305.1	1	1	217	16902
GCA_901223445.1	1	1	618	23290
GCA_901223455.1	1	1	217	16163
GCA_901223525.1	1	1	618	Unknown/Novel
GCA_901223725.1	1	1	306	25526
GCA_901223805.1	1	1	306	Unknown/Novel
GCA_901223885.1	1	1	217	Unknown/Novel
GCA_901224075.1	1	1	612	15725
GCA_901224245.1	1	1	612	Unknown/Novel
GCA_901224445.1	1	1	217	Unknown/Novel
GCA_901224615.1	1	1	3081	14945
GCA_901224625.1	1	1	618	Unknown/Novel
GCA_901224815.1	1	1	618	Unknown/Novel
GCA_901225365.1	1	1	217	Unknown/Novel
GCA_901225455.1	1	1	217	17730
GCA_901225645.1	1	1	217	Unknown/Novel
GCA_901225795.1	1	1	217	Unknown/Novel
GCA_901225905.1	1	1	612	Unknown/Novel
GCA_901226055.1	1	1	217	Unknown/Novel
GCA_901226825.1	1	1	217	Unknown/Novel
GCA_901227025.1	1	1	3081	Unknown/Novel
GCA_901227255.1	1	1	217	Unknown/Novel
GCA_901227475.1	1	1	3081	14402
GCA_901227895.1	1	1	217	16180
GCA_901228455.1	1	1	612	16181
GCA_901228545.1	1	1	217	Unknown/Novel
GCA_901228625.1	1	1	217	Unknown/Novel
GCA_901229415.1	1	1	217	Unknown/Novel
GCA_901229435.1	1	1	8314	Unknown/Novel
GCA_901229535.1	1	1	217	Unknown/Novel
GCA_901230045.1	1	1	3081	26714
GCA_901230305.1	1	1	217	Unknown/Novel
GCA_901230325.1	1	1	217	Unknown/Novel
GCA_901230485.1	1	1	217	Unknown/Novel
GCA_901230595.1	1	1	217	Unknown/Novel
GCA_901230815.1	1	1	217	Unknown/Novel
GCA_901231225.1	1	1	217	Unknown/Novel
GCA_901231395.1	1	1	217	16284
GCA_901231535.1	1	1	217	16189
GCA_901231725.1	1	1	217	Unknown/Novel
GCA_901231925.1	1	1	217	Unknown/Novel
GCA_901232565.1	1	1	303	Unknown/Novel
GCA_901232585.1	1	1	217	Unknown/Novel
GCA_901232655.1	1	1	303	Unknown/Novel
GCA_901232725.1	1	1	612	26602
GCA_901232745.1	1	1	217	15755
GCA_901233025.1	1	1	217	16760
GCA_901233085.1	1	1	217	16031
GCA_901233275.1	1	1	217	17833
GCA_901233415.1	1	1	217	Unknown/Novel
GCA_901233725.1	1	1	217	18173
GCA_901233935.1	1	1	217	Unknown/Novel
GCA_901234095.1	1	1	217	Unknown/Novel
GCA_901234135.1	1	1	217	16291
GCA_901234255.1	1	1	303	Unknown/Novel
GCA_901234305.1	1	1	217	Unknown/Novel
GCA_901234455.1	1	1	217	Unknown/Novel
GCA_901234475.1	1	1	217	Unknown/Novel
GCA_901234625.1	1	1	217	16201
GCA_901234705.1	1	1	217	16923
GCA_901234765.1	1	1	227	21033
GCA_901235015.1	1	1	612	16035
GCA_901235025.1	1	1	217	Unknown/Novel
GCA_901235035.1	1	1	306	Unknown/Novel
GCA_901235065.1	1	1	217	Unknown/Novel
GCA_901235345.1	1	1	306	Unknown/Novel
GCA_901235585.1	1	1	612	26601
GCA_901235735.1	1	1	217	Unknown/Novel
GCA_901235915.1	1	1	217	Unknown/Novel
GCA_901236045.1	1	1	11740	Unknown/Novel
GCA_901236225.1	1	1	612	15586
GCA_901236335.1	1	1	303	Unknown/Novel
GCA_901236365.1	1	1	217	Unknown/Novel
GCA_901236665.1	1	1	217	Unknown/Novel
GCA_901236745.1	1	1	217	15767
GCA_901237095.1	1	1	217	16518
GCA_901237365.1	1	1	8314	16210
GCA_901237395.1	1	1	217	26490
GCA_901237515.1	1	1	217	Unknown/Novel
GCA_901237875.1	1	1	217	Unknown/Novel
GCA_901238155.1	1	1	217	Unknown/Novel
GCA_901238185.1	1	1	217	Unknown/Novel
GCA_901238255.1	1	1	618	Unknown/Novel
GCA_901238285.1	1	1	612	Unknown/Novel
GCA_901238815.1	1	1	612	Unknown/Novel
GCA_901239205.1	1	1	217	Unknown/Novel
GCA_901240005.1	1	1	217	Unknown/Novel
GCA_901240065.1	1	1	612	Unknown/Novel
GCA_901240475.1	1	1	217	Unknown/Novel
GCA_901240685.1	1	1	227	31453
GCA_901241045.1	1	1	217	17666
GCA_901241205.1	1	1	612	15781
GCA_901242075.1	1	1	217	Unknown/Novel
GCA_901242545.1	1	1	612	Unknown/Novel
GCA_901242595.1	1	1	217	26501
GCA_901242635.1	1	1	217	Unknown/Novel
GCA_901242855.1	1	1	612	Unknown/Novel
GCA_901242965.1	1	1	217	Unknown/Novel
GCA_901242975.1	1	1	612	17855
GCA_901243085.1	1	1	217	16938
GCA_901243135.1	1	1	217	Unknown/Novel
GCA_901243255.1	1	1	217	15788
GCA_901243455.1	1	1	217	26499
GCA_901243675.1	1	1	217	Unknown/Novel
GCA_901243755.1	1	1	612	Unknown/Novel
GCA_901243795.1	1	1	9067	Unknown/Novel
GCA_901243915.1	1	1	217	Unknown/Novel
GCA_901244215.1	1	1	227	Unknown/Novel
GCA_901244535.1	1	1	217	Unknown/Novel
GCA_901244725.1	1	1	612	Unknown/Novel
GCA_901244755.1	1	1	9067	Unknown/Novel
GCA_901245185.1	1	1	217	Unknown/Novel
GCA_901245225.1	1	1	217	Unknown/Novel
GCA_901245265.1	1	1	217	17860
GCA_901245385.1	1	1	217	Unknown/Novel
GCA_901245775.1	1	1	217	Unknown/Novel
GCA_901246125.1	1	1	612	Unknown/Novel
GCA_901246265.1	1	1	217	Unknown/Novel
GCA_901246535.1	1	1	217	Unknown/Novel
GCA_901246975.1	1	1	612	Unknown/Novel
GCA_901247085.1	1	1	217	Unknown/Novel
GCA_901247095.1	1	1	217	Unknown/Novel
GCA_901247315.1	1	1	217	Unknown/Novel
GCA_901247765.1	1	1	217	Unknown/Novel
GCA_901247865.1	1	1	618	Unknown/Novel
GCA_901248005.1	1	1	618	Unknown/Novel
GCA_901248165.1	1	1	12546	15802
GCA_901248415.1	1	1	217	Unknown/Novel
GCA_901248525.1	1	1	217	Unknown/Novel
GCA_901248855.1	1	1	217	Unknown/Novel
GCA_901249065.1	1	1	217	Unknown/Novel
GCA_901249245.1	1	1	612	15804
GCA_901250265.1	1	1	217	Unknown/Novel
GCA_901250415.1	1	1	217	17869
GCA_901250995.1	1	1	3081	Unknown/Novel
GCA_901251375.1	1	1	217	Unknown/Novel
GCA_901251645.1	1	1	217	Unknown/Novel
GCA_901251765.1	1	1	217	16890
GCA_901251795.1	1	1	217	Unknown/Novel
GCA_901251805.1	1	1	11046	Unknown/Novel
GCA_901251915.1	1	1	217	Unknown/Novel
GCA_901252105.1	1	1	217	Unknown/Novel
GCA_901252315.1	1	1	9067	16554
GCA_901252405.1	1	1	217	Unknown/Novel
GCA_901252535.1	1	1	3081	Unknown/Novel
GCA_901252585.1	1	1	5002	Unknown/Novel
GCA_901252815.1	1	1	303	Unknown/Novel
GCA_901252865.1	1	1	303	Unknown/Novel
GCA_901252955.1	1	1	217	16556
GCA_901253055.1	1	1	303	Unknown/Novel
GCA_901253385.1	1	1	217	Unknown/Novel
GCA_901253425.1	1	1	217	Unknown/Novel
GCA_901253765.1	1	1	3081	Unknown/Novel
GCA_901254245.1	1	1	306	Unknown/Novel
GCA_901254325.1	1	1	615	24517
GCA_901254445.1	1	1	217	Unknown/Novel
GCA_901254745.1	1	1	217	Unknown/Novel
GCA_901254945.1	1	1	217	Unknown/Novel
GCA_901254965.1	1	1	217	Unknown/Novel
GCA_901255005.1	1	1	217	Unknown/Novel
GCA_901255405.1	1	1	3081	Unknown/Novel
GCA_901255595.1	1	1	217	26511
GCA_901256285.1	1	1	217	Unknown/Novel
GCA_901256335.1	1	1	3081	Unknown/Novel
GCA_901256875.1	1	1	217	Unknown/Novel
GCA_901256915.1	1	1	3081	26707
GCA_901257175.1	1	1	3081	Unknown/Novel
GCA_901257595.1	1	1	3081	26705
GCA_901257785.1	1	1	12739	Unknown/Novel
GCA_901257825.1	1	1	217	Unknown/Novel
GCA_901258045.1	1	1	612	Unknown/Novel
GCA_901258055.1	1	1	11104	Unknown/Novel
GCA_901258085.1	1	1	217	Unknown/Novel
GCA_901258375.1	1	1	3081	Unknown/Novel
GCA_901258485.1	1	1	3081	Unknown/Novel
GCA_901258515.1	1	1	3081	Unknown/Novel
GCA_901258775.1	1	1	217	Unknown/Novel
GCA_901258985.1	1	1	217	26513
GCA_901259405.1	1	1	227	21025
GCA_901259465.1	1	1	217	16576
GCA_901259545.1	1	1	217	Unknown/Novel
GCA_901259855.1	1	1	217	18346
GCA_901259975.1	1	1	217	Unknown/Novel
GCA_901260085.1	1	1	217	Unknown/Novel
GCA_901260095.1	1	1	217	Unknown/Novel
GCA_901260225.1	1	1	3081	26703
GCA_901260365.1	1	1	217	Unknown/Novel
GCA_901260415.1	1	1	3081	26702
GCA_901260725.1	1	1	217	Unknown/Novel
GCA_901261075.1	1	1	3081	26701
GCA_901261205.1	1	1	217	18353
GCA_901261685.1	1	1	8314	Unknown/Novel
GCA_901261965.1	1	1	217	Unknown/Novel
GCA_901262265.1	1	1	3081	Unknown/Novel
GCA_901262335.1	1	1	227	21032
GCA_901262845.1	1	1	217	Unknown/Novel
GCA_901263095.1	1	1	612	18013
GCA_901263235.1	1	1	3081	26660
GCA_901263555.1	1	1	217	16590
GCA_901263605.1	1	1	217	26497
GCA_901263755.1	1	1	3081	Unknown/Novel
GCA_901264105.1	1	1	217	Unknown/Novel
GCA_901264135.1	1	1	3081	26699
GCA_901264255.1	1	1	217	Unknown/Novel
GCA_901264995.1	1	1	612	Unknown/Novel
GCA_901265775.1	1	1	3081	26697
GCA_901265805.1	1	1	9067	26750
GCA_901266465.1	1	1	3081	26696
GCA_901266585.1	1	1	217	Unknown/Novel
GCA_901266695.1	1	1	306	Unknown/Novel
GCA_901266765.1	1	1	217	Unknown/Novel
GCA_901266865.1	1	1	217	Unknown/Novel
GCA_901266895.1	1	1	3081	26695
GCA_901267065.1	1	1	217	Unknown/Novel
GCA_901267135.1	1	1	217	Unknown/Novel
GCA_901267175.1	1	1	217	26509
GCA_901267215.1	1	1	217	Unknown/Novel
GCA_901267325.1	1	1	11743	16359
GCA_901267435.1	1	1	3081	26694
GCA_901267515.1	1	1	11745	26768
GCA_901267605.1	1	1	3081	Unknown/Novel
GCA_901267765.1	1	1	3081	26693
GCA_901267995.1	1	1	3081	26691
GCA_901268045.1	1	1	217	Unknown/Novel
GCA_901268065.1	1	1	3081	Unknown/Novel
GCA_901268125.1	1	1	612	Unknown/Novel
GCA_901268135.1	1	1	3081	26689
GCA_901268195.1	1	1	217	Unknown/Novel
GCA_901268225.1	1	1	306	25547
GCA_901268425.1	1	1	612	Unknown/Novel
GCA_901268465.1	1	1	3081	Unknown/Novel
GCA_901268515.1	1	1	217	Unknown/Novel
GCA_901268595.1	1	1	217	16608
GCA_901268625.1	1	1	217	Unknown/Novel
GCA_901268805.1	1	1	217	Unknown/Novel
GCA_901268845.1	1	1	303	Unknown/Novel
GCA_901269035.1	1	1	217	Unknown/Novel
GCA_901269255.1	1	1	217	Unknown/Novel
GCA_901269265.1	1	1	217	26541
GCA_901269455.1	1	1	217	Unknown/Novel
GCA_901269595.1	1	1	217	26489
GCA_901270165.1	1	1	217	Unknown/Novel
GCA_901270175.1	1	1	11743	Unknown/Novel
GCA_901270195.1	1	1	217	Unknown/Novel
GCA_901270425.1	1	1	217	Unknown/Novel
GCA_901270565.1	1	1	217	26540
GCA_901270775.1	1	1	612	Unknown/Novel
GCA_901270855.1	1	1	217	14989
GCA_901270915.1	1	1	3081	26681
GCA_901272305.1	1	1	217	Unknown/Novel
GCA_901272315.1	1	1	3081	26686
GCA_901272425.1	1	1	612	Unknown/Novel
GCA_901272885.1	1	1	217	15946
GCA_901272965.1	1	1	217	Unknown/Novel
GCA_901273015.1	1	1	217	Unknown/Novel
GCA_901273595.1	1	1	612	26605
GCA_901273995.1	1	1	612	15406
GCA_901274345.1	1	1	3081	Unknown/Novel
GCA_901274555.1	1	1	217	16624
GCA_901274875.1	1	1	217	Unknown/Novel
GCA_901274885.1	1	1	217	Unknown/Novel
GCA_901274985.1	1	1	3081	Unknown/Novel
GCA_901275235.1	1	1	3081	26681
GCA_901275795.1	1	1	217	Unknown/Novel
GCA_901275915.1	1	1	217	Unknown/Novel
GCA_901276165.1	1	1	3081	Unknown/Novel
GCA_901276255.1	1	1	3081	Unknown/Novel
GCA_901276305.1	1	1	217	16383
GCA_901276545.1	1	1	217	Unknown/Novel
GCA_901276715.1	1	1	3081	Unknown/Novel
GCA_901276905.1	1	1	217	Unknown/Novel
GCA_901277205.1	1	1	217	Unknown/Novel
GCA_901277295.1	1	1	217	Unknown/Novel
GCA_901277495.1	1	1	217	Unknown/Novel
GCA_901277525.1	1	1	612	17807
GCA_901277655.1	1	1	612	15836
GCA_901277775.1	1	1	3581	23327
GCA_901277805.1	1	1	3081	26677
GCA_901277835.1	1	1	217	Unknown/Novel
GCA_901277905.1	1	1	217	Unknown/Novel
GCA_901277975.1	1	1	3581	23326
GCA_901278135.1	1	1	217	Unknown/Novel
GCA_901278225.1	1	1	217	26533
GCA_901278325.1	1	1	217	Unknown/Novel
GCA_901278415.1	1	1	618	Unknown/Novel
GCA_901278565.1	1	1	217	Unknown/Novel
GCA_901278675.1	1	1	618	Unknown/Novel
GCA_901278865.1	1	1	618	23320
GCA_901278885.1	1	1	217	15857
GCA_901278965.1	1	1	618	Unknown/Novel
GCA_901279095.1	1	1	3081	26675
GCA_901279275.1	1	1	217	26531
GCA_901279285.1	1	1	217	15863
GCA_901279385.1	1	1	217	Unknown/Novel
GCA_901279485.1	1	1	618	Unknown/Novel
GCA_901279885.1	1	1	217	Unknown/Novel
GCA_901279895.1	1	1	217	26529
GCA_901279985.1	1	1	217	Unknown/Novel
GCA_901280175.1	1	1	3081	Unknown/Novel
GCA_901280315.1	1	1	217	Unknown/Novel
GCA_901280325.1	1	1	612	Unknown/Novel
GCA_901280385.1	1	1	611	17682
GCA_901280525.1	1	1	3081	26672
GCA_901280565.1	1	1	611	24513
GCA_901280695.1	1	1	611	17685
GCA_901280735.1	1	1	3081	Unknown/Novel
GCA_901280925.1	1	1	303	26595
GCA_901280975.1	1	1	612	Unknown/Novel
GCA_901280985.1	1	1	217	17827
GCA_901280995.1	1	1	612	16016
GCA_901281125.1	1	1	3081	Unknown/Novel
GCA_901281275.1	1	1	217	Unknown/Novel
GCA_901281455.1	1	1	612	17881
GCA_901281475.1	1	1	217	Unknown/Novel
GCA_901281855.1	1	1	217	Unknown/Novel
GCA_901282065.1	1	1	217	Unknown/Novel
GCA_901282105.1	1	1	8314	Unknown/Novel
GCA_901282475.1	1	1	217	Unknown/Novel
GCA_901282605.1	1	1	217	Unknown/Novel
GCA_901282695.1	1	1	217	Unknown/Novel
GCA_901282725.1	1	1	217	Unknown/Novel
GCA_901282965.1	1	1	12556	Unknown/Novel
GCA_901283235.1	1	1	217	Unknown/Novel
GCA_901283295.1	1	1	217	Unknown/Novel
GCA_901283345.1	1	1	612	Unknown/Novel
GCA_901283745.1	1	1	3081	Unknown/Novel
GCA_901283815.1	1	1	3081	Unknown/Novel
GCA_901283825.1	1	1	217	Unknown/Novel
GCA_901283855.1	1	1	3081	26668
GCA_901283905.1	1	1	217	Unknown/Novel
GCA_901283975.1	1	1	217	Unknown/Novel
GCA_901284105.1	1	1	303	26609
GCA_901284275.1	1	1	217	Unknown/Novel
GCA_901284645.1	1	1	5784	22812
GCA_901284745.1	1	1	303	4709
GCA_901284755.1	1	1	303	26563
GCA_901284835.1	1	1	304	22776
GCA_901284875.1	1	1	217	26372
GCA_901285085.1	1	1	217	26371
GCA_901285555.1	1	1	217	26370
GCA_901285615.1	1	1	217	26369
GCA_901285635.1	1	1	304	22775
GCA_901286055.1	1	1	217	26375
GCA_901286285.1	1	1	217	26367
GCA_901286305.1	1	1	217	26357
GCA_901286425.1	1	1	304	22766
GCA_901286485.1	1	1	217	26366
GCA_901286565.1	1	1	217	26359
GCA_901286575.1	1	1	217	26358
GCA_901287875.1	1	1	5784	22809
GCA_901288145.1	1	1	217	26356
GCA_901288195.1	1	1	217	26452
GCA_901288365.1	1	1	217	26451
GCA_901288435.1	1	1	217	26450
GCA_901288475.1	1	1	8158	26745
GCA_901288485.1	1	1	304	22760
GCA_901288495.1	1	1	217	26449
GCA_901288655.1	1	1	9529	26754
GCA_901288665.1	1	1	217	26355
GCA_901288705.1	1	1	12333	26772
GCA_901288715.1	1	1	8158	26744
GCA_901288765.1	1	1	217	26448
GCA_901288795.1	1	1	217	26447
GCA_901288975.1	1	1	304	22765
GCA_901289015.1	1	1	217	26354
GCA_901289085.1	1	1	217	Unknown/Novel
GCA_901289105.1	1	1	217	26353
GCA_901289205.1	1	1	217	26351
GCA_901289215.1	1	1	217	26350
GCA_901290675.1	1	1	304	22796
GCA_901291305.1	1	1	217	26411
GCA_901291925.1	1	1	615	24516
GCA_901292125.1	1	1	217	26353
GCA_901292465.1	1	1	8158	26747
GCA_901293095.1	1	1	304	22789
GCA_901293115.1	1	1	217	26488
GCA_901293125.1	1	1	217	26394
GCA_901293155.1	1	1	12150	26770
GCA_901293255.1	1	1	217	26392
GCA_901293275.1	1	1	217	26390
GCA_901293455.1	1	1	615	24515
GCA_901293525.1	1	1	217	26385
GCA_901293625.1	1	1	303	26557
GCA_901293735.1	1	1	217	26398
GCA_901293805.1	1	1	217	26397
GCA_901293915.1	1	1	217	26396
GCA_901294195.1	1	1	217	26441
GCA_901294265.1	1	1	217	26393
GCA_901294525.1	1	1	303	Unknown/Novel
GCA_901294965.1	1	1	217	26391
GCA_901295265.1	1	1	5002	Unknown/Novel
GCA_901295295.1	1	1	5002	Unknown/Novel
GCA_901295575.1	1	1	5002	Unknown/Novel
GCA_901295765.1	1	1	217	26487
GCA_901295885.1	1	1	217	26486
GCA_901295895.1	1	1	303	Unknown/Novel
GCA_901295965.1	1	1	303	Unknown/Novel
GCA_901296055.1	1	1	303	Unknown/Novel
GCA_901296075.1	1	1	303	Unknown/Novel
GCA_901296135.1	1	1	217	26485
GCA_901296155.1	1	1	303	Unknown/Novel
GCA_901296355.1	1	1	217	26389
GCA_901296405.1	1	1	217	26388
GCA_901296505.1	1	1	11745	3992
GCA_901296755.1	1	1	303	Unknown/Novel
GCA_901296775.1	1	1	217	26387
GCA_901296805.1	1	1	217	26475
GCA_901296875.1	1	1	217	26473
GCA_901296885.1	1	1	217	26474
GCA_901296975.1	1	1	618	23316
GCA_901297005.1	1	1	217	26386
GCA_901297045.1	1	1	618	23313
GCA_901297075.1	1	1	618	23314
GCA_901297145.1	1	1	618	23315
GCA_901297175.1	1	1	217	26472
GCA_901297195.1	1	1	3081	26642
GCA_901297255.1	1	1	3081	26641
GCA_901297305.1	1	1	618	23312
GCA_901297395.1	1	1	217	26384
GCA_901297425.1	1	1	3081	26640
GCA_901297495.1	1	1	3081	26639
GCA_901297535.1	1	1	3081	26636
GCA_901297545.1	1	1	3081	26638
GCA_901297585.1	1	1	3081	26637
GCA_901297695.1	1	1	3081	26635
GCA_901297705.1	1	1	303	26559
GCA_901297725.1	1	1	3081	26634
GCA_901297795.1	1	1	217	26471
GCA_901297805.1	1	1	3081	26633
GCA_901297875.1	1	1	3081	26632
GCA_901297925.1	1	1	217	26470
GCA_901297945.1	1	1	217	26401
GCA_901297955.1	1	1	3081	26631
GCA_901298035.1	1	1	3081	26630
GCA_901298115.1	1	1	618	23311
GCA_901298125.1	1	1	217	26468
GCA_901298135.1	1	1	304	22788
GCA_901298145.1	1	1	217	26469
GCA_901298155.1	1	1	217	26400
GCA_901298195.1	1	1	217	26467
GCA_901298265.1	1	1	217	26446
GCA_901298275.1	1	1	217	26399
GCA_901298315.1	1	1	11745	26766
GCA_901298335.1	1	1	618	23310
GCA_901298365.1	1	1	3081	26629
GCA_901298455.1	1	1	3081	26628
GCA_901298545.1	1	1	3081	26626
GCA_901298615.1	1	1	3081	26627
GCA_901298635.1	1	1	3081	26625
GCA_901298725.1	1	1	3081	26624
GCA_901298775.1	1	1	11745	26765
GCA_901298795.1	1	1	618	23309
GCA_901298835.1	1	1	3081	26623
GCA_901298905.1	1	1	3081	26621
GCA_901298935.1	1	1	3081	26622
GCA_901298995.1	1	1	618	23308
GCA_901299045.1	1	1	618	23307
GCA_901299065.1	1	1	217	26483
GCA_901299075.1	1	1	217	26484
GCA_901299105.1	1	1	3081	26620
GCA_901299135.1	1	1	3081	26618
GCA_901299195.1	1	1	3081	26619
GCA_901299305.1	1	1	618	23306
GCA_901299335.1	1	1	618	23305
GCA_901299355.1	1	1	618	23304
GCA_901299385.1	1	1	3081	26617
GCA_901299415.1	1	1	303	26558
GCA_901299545.1	1	1	3081	26616
GCA_901299585.1	1	1	217	26482
GCA_901299605.1	1	1	618	23303
GCA_901299855.1	1	1	3081	26709
GCA_901299925.1	1	1	3081	26615
GCA_901299975.1	1	1	3081	26613
GCA_901300115.1	1	1	3081	26611
GCA_901300135.1	1	1	3081	26612
GCA_901300215.1	1	1	3081	26610
GCA_901300525.1	1	1	612	26604
GCA_901300665.1	1	1	217	26481
GCA_901300955.1	1	1	217	26480
GCA_901301085.1	1	1	8158	26742
GCA_901301105.1	1	1	217	26479
GCA_901301265.1	1	1	5012	26726
GCA_901301385.1	1	1	217	26427
GCA_901301475.1	1	1	217	Unknown/Novel
GCA_901301535.1	1	1	217	26426
GCA_901301595.1	1	1	217	26425
GCA_901301715.1	1	1	3081	26646
GCA_901301735.1	1	1	217	26420
GCA_901301875.1	1	1	217	26423
GCA_901302075.1	1	1	217	26422
GCA_901302265.1	1	1	217	26421
GCA_901302325.1	1	1	217	Unknown/Novel
GCA_901302575.1	1	1	217	26464
GCA_901303205.1	1	1	217	26509
GCA_901303325.1	1	1	3081	Unknown/Novel
GCA_901303595.1	1	1	11745	26764
GCA_901303645.1	1	1	2296	24518
GCA_901304115.1	1	1	217	26420
GCA_901304165.1	1	1	217	26377
GCA_901304235.1	1	1	615	24511
GCA_901304375.1	1	1	618	Unknown/Novel
GCA_901304405.1	1	1	8158	26746
GCA_901304425.1	1	1	217	Unknown/Novel
GCA_901304785.1	1	1	217	26462
GCA_901305145.1	1	1	5012	26723
GCA_901305455.1	1	1	217	26461
GCA_901305505.1	1	1	217	26460
GCA_901305755.1	1	1	5012	26722
GCA_901305835.1	1	1	217	26459
GCA_901305955.1	1	1	303	26566
GCA_901306105.1	1	1	12165	26771
GCA_901306285.1	1	1	217	26458
GCA_901306415.1	1	1	303	26339
GCA_901306465.1	1	1	303	26566
GCA_901306535.1	1	1	303	26566
GCA_901306575.1	1	1	9231	24512
GCA_901306805.1	1	1	217	26440
GCA_901306845.1	1	1	5012	26725
GCA_901306855.1	1	1	3081	Unknown/Novel
GCA_901307175.1	1	1	5802	26735
GCA_901307315.1	1	1	5012	26724
GCA_901307415.1	1	1	217	26466
GCA_901307595.1	1	1	217	26465
GCA_901307815.1	1	1	217	Unknown/Novel
GCA_901307875.1	1	1	5784	22815
GCA_901310445.1	1	1	217	26439
GCA_901310895.1	1	1	217	26438
GCA_901311355.1	1	1	306	25533
GCA_901311915.1	1	1	217	26383
GCA_901312535.1	1	1	217	26382
GCA_901312635.1	1	1	217	26419
GCA_901312705.1	1	1	217	26376
GCA_901312735.1	1	1	217	18038
GCA_901312825.1	1	1	217	Unknown/Novel
GCA_901312905.1	1	1	11743	Unknown/Novel
GCA_901313095.1	1	1	217	26417
GCA_901313175.1	1	1	217	26416
GCA_901313255.1	1	1	6983	26741
GCA_901313285.1	1	1	612	Unknown/Novel
GCA_901313465.1	1	1	217	26457
GCA_901313505.1	1	1	5802	26734
GCA_901313575.1	1	1	306	Unknown/Novel
GCA_901313665.1	1	1	217	26381
GCA_901313815.1	1	1	5802	26733
GCA_901314085.1	1	1	5784	22816
GCA_901314145.1	1	1	4752	24073
GCA_901314155.1	1	1	5802	26731
GCA_901314165.1	1	1	5802	26732
GCA_901314375.1	1	1	5802	26730
GCA_901314595.1	1	1	217	26415
GCA_901315255.1	1	1	3081	14922
GCA_901315435.1	1	1	612	Unknown/Novel
GCA_901315635.1	1	1	304	22805
GCA_901315675.1	1	1	217	26380
GCA_901316465.1	1	1	217	26379
GCA_901316725.1	1	1	217	Unknown/Novel
GCA_901316745.1	1	1	6983	26740
GCA_901316795.1	1	1	217	26378
GCA_901316925.1	1	1	5802	26729
GCA_901317065.1	1	1	217	Unknown/Novel
GCA_901317325.1	1	1	9067	Unknown/Novel
GCA_901317405.1	1	1	6983	26739
GCA_901317495.1	1	1	6983	26738
GCA_901317645.1	1	1	5784	22813
GCA_901317895.1	1	1	612	16453
GCA_901318145.1	1	1	6983	26737
GCA_901318445.1	1	1	6983	26736
GCA_901318855.1	1	1	217	26420
GCA_901318895.1	1	1	217	26374
GCA_901319125.1	1	1	217	26413
GCA_901319185.1	1	1	217	26412
GCA_901319535.1	1	1	612	Unknown/Novel
GCA_901319625.1	1	1	612	Unknown/Novel
GCA_901319685.1	1	1	217	26414
GCA_901319755.1	1	1	612	Unknown/Novel
GCA_901319935.1	1	1	217	Unknown/Novel
GCA_901320415.1	1	1	3081	14945
GCA_901320915.1	1	1	3081	14597
GCA_901320995.1	1	1	612	16909
GCA_901322455.1	1	1	227	21023
GCA_901322535.1	1	1	303	26584
GCA_901322625.1	1	1	217	26496
GCA_901322665.1	1	1	303	Unknown/Novel
GCA_901322695.1	1	1	12781	Unknown/Novel
GCA_901322965.1	1	1	303	Unknown/Novel
GCA_901323025.1	1	1	303	Unknown/Novel
GCA_901323065.1	1	1	303	Unknown/Novel
GCA_901323205.1	1	1	5044	26727
GCA_901323365.1	1	1	5002	Unknown/Novel
GCA_901323565.1	1	1	303	Unknown/Novel
GCA_901325185.1	1	1	217	26478
GCA_901325235.1	1	1	217	26477
GCA_901325375.1	1	1	217	26476
GCA_901328045.1	1	1	217	26410
GCA_901328165.1	1	1	304	22781
GCA_901328445.1	1	1	217	26409
GCA_901328565.1	1	1	612	26603
GCA_901328815.1	1	1	304	22779
GCA_901329535.1	1	1	217	26408
GCA_901329695.1	1	1	217	26407
GCA_901329915.1	1	1	217	26439
GCA_901329965.1	1	1	217	26405
GCA_901330025.1	1	1	615	24514
GCA_901330235.1	1	1	217	26404
GCA_901330305.1	1	1	5784	22818
GCA_901331015.1	1	1	5191	26728
GCA_901331075.1	1	1	217	26402
GCA_901331235.1	1	1	217	26365
GCA_901331275.1	1	1	217	26445
GCA_901331345.1	1	1	217	26442
GCA_901331845.1	1	1	304	22769
GCA_901332145.1	1	1	217	26443
GCA_901332415.1	1	1	217	26364
GCA_901332475.1	1	1	217	26363
GCA_901332525.1	1	1	217	26442
GCA_901332565.1	1	1	9529	26753
GCA_901332635.1	1	1	5012	26721
GCA_901332855.1	1	1	8158	26742
GCA_901333185.1	1	1	217	26362
GCA_901333315.1	1	1	3081	Unknown/Novel
GCA_901333545.1	1	1	3081	Unknown/Novel
GCA_901333595.1	1	1	217	26361
GCA_901333675.1	1	1	217	26437
GCA_901333875.1	1	1	217	26436
GCA_901333925.1	1	1	217	26360
GCA_901333935.1	1	1	217	26395
GCA_901334095.1	1	1	217	18112
GCA_901334215.1	1	1	3081	Unknown/Novel
GCA_901334235.1	1	1	217	26435
GCA_901334285.1	1	1	217	26434
GCA_901334945.1	1	1	217	26420
GCA_901334965.1	1	1	3081	Unknown/Novel
GCA_901334975.1	1	1	217	26456
GCA_901335005.1	1	1	217	26432
GCA_901335215.1	1	1	217	26431
GCA_901335255.1	1	1	217	26455
GCA_901335345.1	1	1	3081	Unknown/Novel
GCA_901335395.1	1	1	217	26430
GCA_901335415.1	1	1	3081	26649
GCA_901335515.1	1	1	217	26429
GCA_901335535.1	1	1	217	26454
GCA_901335585.1	1	1	217	26420
GCA_901335645.1	1	1	3081	26648
GCA_901335745.1	1	1	217	26453
GCA_901336025.1	1	1	3081	Unknown/Novel
GCA_901336125.1	1	1	612	Unknown/Novel
GCA_901336545.1	1	1	612	Unknown/Novel
GCA_901336625.1	1	1	9067	Unknown/Novel
GCA_901336885.1	1	1	9067	Unknown/Novel
GCA_901337295.1	1	1	217	Unknown/Novel
GCA_901337475.1	1	1	217	Unknown/Novel
GCA_901338605.1	1	1	217	15705
GCA_901338615.1	1	1	217	Unknown/Novel
GCA_901338775.1	1	1	217	Unknown/Novel
GCA_901339395.1	1	1	217	Unknown/Novel
GCA_901339555.1	1	1	8314	Unknown/Novel
GCA_901339585.1	1	1	217	Unknown/Novel
GCA_901339665.1	1	1	9067	Unknown/Novel
GCA_901339705.1	1	1	9067	18153
GCA_901339735.1	1	1	217	Unknown/Novel
GCA_901339755.1	1	1	612	Unknown/Novel
GCA_901339885.1	1	1	217	16769
GCA_901339895.1	1	1	217	Unknown/Novel
GCA_901340295.1	1	1	217	Unknown/Novel
GCA_901340455.1	1	1	3081	Unknown/Novel
GCA_901340475.1	1	1	3081	Unknown/Novel
GCA_901341115.1	1	1	3081	Unknown/Novel
GCA_901341175.1	1	1	217	26403
GCA_901341185.1	1	1	5784	22819
GCA_901341315.1	1	1	217	26368
GCA_901341375.1	1	1	217	26376
GCA_901341515.1	1	1	3081	Unknown/Novel
GCA_901341525.1	1	1	3081	Unknown/Novel
GCA_901341685.1	1	1	217	Unknown/Novel
GCA_901342895.1	1	1	217	Unknown/Novel
GCA_901342905.1	1	1	303	Unknown/Novel
GCA_901343065.1	1	1	3081	Unknown/Novel
GCA_901343095.1	1	1	3081	Unknown/Novel
GCA_901343145.1	1	1	3081	Unknown/Novel
GCA_902652885.1	1	1	227	35495
GCA_902652915.1	1	1	227	35498
GCA_902652925.1	1	1	306	35497
GCA_902652945.1	1	1	304	35510
GCA_902652955.1	1	1	306	35496
GCA_902652995.1	1	1	227	35502
GCA_902653005.1	1	1	227	35504
GCA_902653015.1	1	1	304	35505
GCA_901218605.1	1	1	303	Unknown/Novel
GCA_901289495.1	1	1	303	26562
GCA_901289835.1	1	1	303	26561
GCA_901290405.1	1	1	303	26560
GCA_901323275.1	1	1	303	Unknown/Novel
GCA_901323345.1	1	1	303	Unknown/Novel
GCA_901323535.1	1	1	303	26587
GCA_900050105.1	1	1	217	Unknown/Novel
GCA_900051295.1	1	1	217	Unknown/Novel
GCA_900059655.1	1	1	227	Unknown/Novel
GCA_901323175.1	1	1	10996	Unknown/Novel
GCA_901316865.1	1	1	217	Unknown/Novel
GCA_001326535.1	2	2	574	Unknown/Novel
GCA_001131945.1	2	2	3744	Unknown/Novel
GCA_001335815.1	2	2	1504	5884
GCA_901216755.1	2	2	9476	Unknown/Novel
GCA_901233135.1	2	2	74	Unknown/Novel
GCA_901252075.1	2	2	74	Unknown/Novel
GCA_901260185.1	2	2	9476	28532
GCA_901265995.1	2	2	74	Unknown/Novel
GCA_901275215.1	2	2	74	Unknown/Novel
GCA_901278605.1	2	2	11692	Unknown/Novel
GCA_901280025.1	2	2	11692	Unknown/Novel
GCA_901286645.1	2	2	1504	28518
GCA_901287475.1	2	2	1504	28516
GCA_901288065.1	2	2	1504	28517
GCA_901288595.1	2	2	9476	28528
GCA_901291105.1	2	2	1504	Unknown/Novel
GCA_901292985.1	2	2	74	28502
GCA_901301565.1	2	2	1504	28523
GCA_901303575.1	2	2	74	Unknown/Novel
GCA_901304085.1	2	2	9476	28531
GCA_901304385.1	2	2	1504	28521
GCA_901305995.1	2	2	9476	28530
GCA_901306225.1	2	2	9476	28529
GCA_901311285.1	2	2	1504	28524
GCA_901312775.1	2	2	74	28503
GCA_901315585.1	2	2	1504	28522
GCA_901318485.1	2	2	1504	28525
GCA_901323265.1	2	2	74	28506
GCA_901324505.1	2	2	74	Unknown/Novel
GCA_901324795.1	2	2	74	Unknown/Novel
GCA_901325055.1	2	2	74	Unknown/Novel
GCA_901326055.1	2	2	1504	28519
GCA_901326485.1	2	2	74	28502
GCA_901327275.1	2	2	74	Unknown/Novel
GCA_901327405.1	2	2	74	Unknown/Novel
GCA_901330245.1	2	2	1504	28520
GCA_901335895.1	2	2	74	Unknown/Novel
GCA_901340275.1	2	2	74	Unknown/Novel
GCA_900063765.1	3	3	700	Unknown/Novel
GCA_900065865.1	3	3	700	3135
GCA_901213985.1	3	3	700	26173
GCA_901214435.1	3	3	700	26172
GCA_901216035.1	3	3	700	26171
GCA_901216875.1	3	3	700	26170
GCA_901217855.1	3	3	700	26169
GCA_901220755.1	3	3	700	26168
GCA_901223915.1	3	3	700	26167
GCA_901226675.1	3	3	700	Unknown/Novel
GCA_901241115.1	3	3	700	Unknown/Novel
GCA_901250345.1	3	3	700	Unknown/Novel
GCA_901256605.1	3	3	271	Unknown/Novel
GCA_901261805.1	3	3	700	26185
GCA_901262225.1	3	3	700	16586
GCA_901265615.1	3	3	700	Unknown/Novel
GCA_901270335.1	3	3	700	26191
GCA_901270675.1	3	3	700	Unknown/Novel
GCA_901275405.1	3	3	700	14735
GCA_901293585.1	3	3	700	26184
GCA_901297865.1	3	3	700	26178
GCA_901300395.1	3	3	700	26182
GCA_901300745.1	3	3	700	26181
GCA_901301195.1	3	3	700	26180
GCA_901301445.1	3	3	700	26177
GCA_901303035.1	3	3	6012	Unknown/Novel
GCA_901305175.1	3	3	700	26176
GCA_901315265.1	3	3	700	Unknown/Novel
GCA_901320585.1	3	3	700	26193
GCA_901323125.1	3	3	700	26183
GCA_901325475.1	3	3	700	26179
GCA_901327575.1	3	3	3214	Unknown/Novel
GCA_901329595.1	3	3	700	26174
GCA_901330795.1	3	3	3214	Unknown/Novel
GCA_901332375.1	3	3	700	26175
GCA_901337435.1	3	3	700	19427
GCA_901339255.1	3	3	271	Unknown/Novel
GCA_901340525.1	3	3	700	Unknown/Novel
GCA_901342265.1	3	3	700	Unknown/Novel
GCA_901342775.1	3	3	700	Unknown/Novel
GCA_001107725.1	3	3	458	Unknown/Novel
GCA_001111165.1	3	3	4389	1100
GCA_001117825.1	3	3	458	1114
GCA_001129125.1	3	3	458	Unknown/Novel
GCA_001134765.1	3	3	4389	Unknown/Novel
GCA_001136485.1	3	3	458	1099
GCA_001142485.1	3	3	180	Unknown/Novel
GCA_001143685.1	3	3	180	Unknown/Novel
GCA_001152485.1	3	3	6012	1105
GCA_001153925.1	3	3	458	1095
GCA_001154105.1	3	3	10441	1115
GCA_001197215.1	3	3	180	Unknown/Novel
GCA_001206375.1	3	3	180	Unknown/Novel
GCA_001206415.1	3	3	180	Unknown/Novel
GCA_001335935.1	3	3	4389	Unknown/Novel
GCA_001341035.1	3	3	4389	Unknown/Novel
GCA_900065565.2	3	3	1220	24050
GCA_901216105.1	3	3	458	Unknown/Novel
GCA_901216585.1	3	3	458	Unknown/Novel
GCA_901217875.1	3	3	2021	Unknown/Novel
GCA_901221345.1	3	3	458	Unknown/Novel
GCA_901222035.1	3	3	260	Unknown/Novel
GCA_901225005.1	3	3	458	19105
GCA_901226545.1	3	3	7545	Unknown/Novel
GCA_901227225.1	3	3	7545	24704
GCA_901227795.1	3	3	62	Unknown/Novel
GCA_901228375.1	3	3	11686	15556
GCA_901230655.1	3	3	378	15567
GCA_901230695.1	3	3	458	19125
GCA_901232485.1	3	3	16614	Unknown/Novel
GCA_901233105.1	3	3	458	Unknown/Novel
GCA_901234605.1	3	3	7369	25050
GCA_901235415.1	3	3	1220	24051
GCA_901235535.1	3	3	180	Unknown/Novel
GCA_901236585.1	3	3	458	Unknown/Novel
GCA_901236855.1	3	3	458	Unknown/Novel
GCA_901238295.1	3	3	1116	Unknown/Novel
GCA_901238705.1	3	3	12606	Unknown/Novel
GCA_901238745.1	3	3	458	Unknown/Novel
GCA_901241425.1	3	3	1116	Unknown/Novel
GCA_901242695.1	3	3	662	9169
GCA_901242745.1	3	3	11128	24706
GCA_901242805.1	3	3	458	Unknown/Novel
GCA_901243965.1	3	3	1220	Unknown/Novel
GCA_901244975.1	3	3	458	Unknown/Novel
GCA_901246285.1	3	3	458	Unknown/Novel
GCA_901246875.1	3	3	10440	Unknown/Novel
GCA_901248895.1	3	3	7545	24703
GCA_901248985.1	3	3	4655	23094
GCA_901249155.1	3	3	1220	15302
GCA_901249405.1	3	3	12590	16849
GCA_901249895.1	3	3	458	Unknown/Novel
GCA_901250225.1	3	3	458	Unknown/Novel
GCA_901251635.1	3	3	458	Unknown/Novel
GCA_901254025.1	3	3	458	Unknown/Novel
GCA_901254575.1	3	3	458	24702
GCA_901255695.1	3	3	7369	18321
GCA_901257415.1	3	3	260	Unknown/Novel
GCA_901262025.1	3	3	260	24044
GCA_901262935.1	3	3	458	Unknown/Novel
GCA_901264125.1	3	3	458	Unknown/Novel
GCA_901264715.1	3	3	458	Unknown/Novel
GCA_901265425.1	3	3	458	Unknown/Novel
GCA_901267055.1	3	3	458	Unknown/Novel
GCA_901267285.1	3	3	1377	Unknown/Novel
GCA_901270135.1	3	3	458	Unknown/Novel
GCA_901270635.1	3	3	458	Unknown/Novel
GCA_901272625.1	3	3	1377	Unknown/Novel
GCA_901273045.1	3	3	458	Unknown/Novel
GCA_901274785.1	3	3	458	Unknown/Novel
GCA_901277215.1	3	3	458	Unknown/Novel
GCA_901277405.1	3	3	260	24046
GCA_901278575.1	3	3	172	27509
GCA_901282335.1	3	3	458	17700
GCA_901282385.1	3	3	458	Unknown/Novel
GCA_901283555.1	3	3	458	Unknown/Novel
GCA_901283615.1	3	3	458	Unknown/Novel
GCA_901285495.1	3	3	6012	Unknown/Novel
GCA_901285575.1	3	3	4655	23089
GCA_901289685.1	3	3	6014	25051
GCA_901290085.1	3	3	6360	24109
GCA_901302955.1	3	3	10606	Unknown/Novel
GCA_901303535.1	3	3	6012	Unknown/Novel
GCA_901303695.1	3	3	6012	Unknown/Novel
GCA_901303775.1	3	3	6012	23086
GCA_901304345.1	3	3	6012	Unknown/Novel
GCA_901305895.1	3	3	4655	23081
GCA_901306265.1	3	3	6012	Unknown/Novel
GCA_901306645.1	3	3	6012	Unknown/Novel
GCA_901306775.1	3	3	6012	Unknown/Novel
GCA_901307555.1	3	3	260	Unknown/Novel
GCA_901310155.1	3	3	232	25047
GCA_901310345.1	3	3	260	24043
GCA_901311465.1	3	3	260	24041
GCA_901313885.1	3	3	6012	Unknown/Novel
GCA_901314295.1	3	3	232	25046
GCA_901314335.1	3	3	458	Unknown/Novel
GCA_901315895.1	3	3	260	24042
GCA_901317625.1	3	3	458	Unknown/Novel
GCA_901318875.1	3	3	1220	24049
GCA_901320555.1	3	3	458	Unknown/Novel
GCA_901321245.1	3	3	458	Unknown/Novel
GCA_901321645.1	3	3	458	Unknown/Novel
GCA_901322045.1	3	3	458	Unknown/Novel
GCA_901322315.1	3	3	458	Unknown/Novel
GCA_901322475.1	3	3	458	Unknown/Novel
GCA_901322575.1	3	3	458	Unknown/Novel
GCA_901324025.1	3	3	458	Unknown/Novel
GCA_901324155.1	3	3	458	19073
GCA_901325775.1	3	3	180	Unknown/Novel
GCA_901336635.1	3	3	458	Unknown/Novel
GCA_901336715.1	3	3	10606	Unknown/Novel
GCA_901337545.1	3	3	4655	23093
GCA_901338875.1	3	3	458	Unknown/Novel
GCA_901342965.1	3	3	458	Unknown/Novel
GCA_900191755.1	3	3	180	Unknown/Novel
GCA_901235115.1	3	3	Unknown	21883
GCA_901331145.1	3	3	7053	22473
GCA_001082985.2	3	3	180	Unknown/Novel
GCA_001083685.1	3	3	180	Unknown/Novel
GCA_001087745.2	3	3	180	Unknown/Novel
GCA_001088625.1	3	3	180	Unknown/Novel
GCA_001089685.1	3	3	180	Unknown/Novel
GCA_001090765.1	3	3	16511	Unknown/Novel
GCA_001092285.1	3	3	180	Unknown/Novel
GCA_001093965.1	3	3	1826	Unknown/Novel
GCA_001094985.1	3	3	16512	Unknown/Novel
GCA_001096305.1	3	3	8799	Unknown/Novel
GCA_001096625.1	3	3	180	Unknown/Novel
GCA_001098185.1	3	3	4389	1098
GCA_001100745.1	3	3	4389	6032
GCA_001104585.2	3	3	180	Unknown/Novel
GCA_001104765.1	3	3	505	Unknown/Novel
GCA_001105125.1	3	3	180	Unknown/Novel
GCA_001106805.1	3	3	458	1097
GCA_001107565.1	3	3	180	Unknown/Novel
GCA_001108225.1	3	3	180	Unknown/Novel
GCA_001110885.1	3	3	4389	1111
GCA_001111765.2	3	3	180	Unknown/Novel
GCA_001113225.1	3	3	4389	6077
GCA_001117065.1	3	3	4389	1101
GCA_001118265.1	3	3	180	Unknown/Novel
GCA_001118685.1	3	3	180	Unknown/Novel
GCA_001118985.1	3	3	180	Unknown/Novel
GCA_001120365.1	3	3	180	Unknown/Novel
GCA_001122385.2	3	3	180	Unknown/Novel
GCA_001125385.1	3	3	180	Unknown/Novel
GCA_001125905.1	3	3	180	Unknown/Novel
GCA_001126105.1	3	3	180	Unknown/Novel
GCA_001127045.1	3	3	4389	1091
GCA_001127405.2	3	3	180	Unknown/Novel
GCA_001127985.1	3	3	180	Unknown/Novel
GCA_001128905.1	3	3	180	Unknown/Novel
GCA_001130385.2	3	3	180	Unknown/Novel
GCA_001133165.1	3	3	180	Unknown/Novel
GCA_001134825.2	3	3	180	Unknown/Novel
GCA_001136105.1	3	3	4389	Unknown/Novel
GCA_001138065.1	3	3	180	Unknown/Novel
GCA_001138205.1	3	3	180	Unknown/Novel
GCA_001139525.1	3	3	180	Unknown/Novel
GCA_001140645.1	3	3	180	Unknown/Novel
GCA_001149565.1	3	3	4389	1103
GCA_001150425.2	3	3	180	Unknown/Novel
GCA_001153045.1	3	3	180	Unknown/Novel
GCA_001153285.1	3	3	4389	Unknown/Novel
GCA_001153745.1	3	3	4389	Unknown/Novel
GCA_001154085.1	3	3	4389	1092
GCA_001154345.1	3	3	180	Unknown/Novel
GCA_001155185.1	3	3	180	Unknown/Novel
GCA_001155205.1	3	3	180	Unknown/Novel
GCA_001158845.1	3	3	180	Unknown/Novel
GCA_001158925.1	3	3	4389	1090
GCA_001160305.1	3	3	180	Unknown/Novel
GCA_001160925.1	3	3	180	Unknown/Novel
GCA_001162585.1	3	3	180	Unknown/Novel
GCA_001163185.1	3	3	180	Unknown/Novel
GCA_001163565.1	3	3	180	Unknown/Novel
GCA_001163745.1	3	3	4389	1104
GCA_001163965.1	3	3	180	Unknown/Novel
GCA_001167925.1	3	3	180	Unknown/Novel
GCA_001174025.2	3	3	180	Unknown/Novel
GCA_001174305.1	3	3	4389	1093
GCA_001193215.1	3	3	180	Unknown/Novel
GCA_001193815.1	3	3	180	Unknown/Novel
GCA_001193895.1	3	3	180	Unknown/Novel
GCA_001195425.1	3	3	180	Unknown/Novel
GCA_001195705.1	3	3	180	Unknown/Novel
GCA_001196205.1	3	3	180	Unknown/Novel
GCA_001196695.1	3	3	180	Unknown/Novel
GCA_001197995.1	3	3	505	Unknown/Novel
GCA_001199355.1	3	3	180	Unknown/Novel
GCA_001199995.1	3	3	180	Unknown/Novel
GCA_001202475.1	3	3	180	Unknown/Novel
GCA_001202615.1	3	3	180	Unknown/Novel
GCA_001204315.1	3	3	180	Unknown/Novel
GCA_001207375.1	3	3	180	Unknown/Novel
GCA_001208845.1	3	3	180	Unknown/Novel
GCA_001210345.1	3	3	180	Unknown/Novel
GCA_001210465.1	3	3	180	Unknown/Novel
GCA_001210605.1	3	3	180	Unknown/Novel
GCA_001211545.1	3	3	180	Unknown/Novel
GCA_001212125.1	3	3	180	Unknown/Novel
GCA_001212925.1	3	3	180	Unknown/Novel
GCA_001299855.2	3	3	180	Unknown/Novel
GCA_001326615.1	3	3	180	Unknown/Novel
GCA_001326635.1	3	3	16513	Unknown/Novel
GCA_001326655.1	3	3	180	Unknown/Novel
GCA_001326675.1	3	3	180	Unknown/Novel
GCA_001326695.1	3	3	180	Unknown/Novel
GCA_001326715.1	3	3	180	Unknown/Novel
GCA_001326735.1	3	3	180	Unknown/Novel
GCA_001326755.1	3	3	180	Unknown/Novel
GCA_001326775.1	3	3	180	Unknown/Novel
GCA_001326795.1	3	3	180	Unknown/Novel
GCA_001326815.1	3	3	180	Unknown/Novel
GCA_001326835.1	3	3	180	Unknown/Novel
GCA_001326855.1	3	3	180	Unknown/Novel
GCA_001326875.1	3	3	180	Unknown/Novel
GCA_001340775.1	3	3	4389	1103
GCA_001341895.1	3	3	4389	1108
GCA_001342055.1	3	3	4389	1107
GCA_001344695.1	3	3	4389	Unknown/Novel
GCA_001566135.1	3	3	4389	1113
GCA_900033805.2	3	3	180	Unknown/Novel
GCA_900033975.2	3	3	180	Unknown/Novel
GCA_900049565.2	3	3	180	Unknown/Novel
GCA_900053765.2	3	3	180	Unknown/Novel
GCA_900054215.2	3	3	180	Unknown/Novel
GCA_900054975.2	3	3	10179	Unknown/Novel
GCA_900055965.2	3	3	180	Unknown/Novel
GCA_900057175.2	3	3	180	Unknown/Novel
GCA_900059625.2	3	3	180	Unknown/Novel
GCA_900059865.2	3	3	180	Unknown/Novel
GCA_900064945.2	3	3	12734	Unknown/Novel
GCA_900188645.1	3	3	180	Unknown/Novel
GCA_900189495.1	3	3	180	Unknown/Novel
GCA_900190705.1	3	3	180	Unknown/Novel
GCA_900190855.1	3	3	180	Unknown/Novel
GCA_900191285.1	3	3	180	Unknown/Novel
GCA_900192015.1	3	3	180	Unknown/Novel
GCA_900192915.1	3	3	Unknown	Unknown/Novel
GCA_900193765.1	3	3	180	Unknown/Novel
GCA_900193965.1	3	3	180	Unknown/Novel
GCA_900194145.1	3	3	180	Unknown/Novel
GCA_900194185.1	3	3	180	Unknown/Novel
GCA_900618575.1	3	3	180	Unknown/Novel
GCA_900618585.1	3	3	180	Unknown/Novel
GCA_900795245.1	3	3	458	24677
GCA_901213765.1	3	3	9060	Unknown/Novel
GCA_901213845.1	3	3	458	Unknown/Novel
GCA_901216895.1	3	3	180	Unknown/Novel
GCA_901217325.1	3	3	180	Unknown/Novel
GCA_901217835.1	3	3	180	Unknown/Novel
GCA_901218425.1	3	3	180	Unknown/Novel
GCA_901218665.1	3	3	12780	Unknown/Novel
GCA_901220495.1	3	3	180	Unknown/Novel
GCA_901221635.1	3	3	180	Unknown/Novel
GCA_901223235.1	3	3	180	Unknown/Novel
GCA_901226965.1	3	3	458	Unknown/Novel
GCA_901227035.1	3	3	180	Unknown/Novel
GCA_901227325.1	3	3	180	Unknown/Novel
GCA_901227765.1	3	3	180	Unknown/Novel
GCA_901228185.1	3	3	180	Unknown/Novel
GCA_901228695.1	3	3	180	Unknown/Novel
GCA_901228955.1	3	3	458	17654
GCA_901229475.1	3	3	180	Unknown/Novel
GCA_901232535.1	3	3	180	Unknown/Novel
GCA_901235165.1	3	3	180	Unknown/Novel
GCA_901236245.1	3	3	180	Unknown/Novel
GCA_901236485.1	3	3	180	Unknown/Novel
GCA_901236595.1	3	3	180	Unknown/Novel
GCA_901237025.1	3	3	180	Unknown/Novel
GCA_901237195.1	3	3	180	Unknown/Novel
GCA_901238095.1	3	3	180	Unknown/Novel
GCA_901238345.1	3	3	1765	Unknown/Novel
GCA_901238375.1	3	3	180	27372
GCA_901238625.1	3	3	458	18610
GCA_901238665.1	3	3	5435	22223
GCA_901238715.1	3	3	458	Unknown/Novel
GCA_901239695.1	3	3	180	Unknown/Novel
GCA_901239895.1	3	3	458	Unknown/Novel
GCA_901240415.1	3	3	180	Unknown/Novel
GCA_901244085.1	3	3	10455	Unknown/Novel
GCA_901244195.1	3	3	458	18610
GCA_901245565.1	3	3	180	Unknown/Novel
GCA_901245715.1	3	3	458	Unknown/Novel
GCA_901245825.1	3	3	1765	18636
GCA_901245835.1	3	3	180	Unknown/Novel
GCA_901245955.1	3	3	180	Unknown/Novel
GCA_901247105.1	3	3	180	Unknown/Novel
GCA_901247515.1	3	3	12523	15375
GCA_901248515.1	3	3	180	Unknown/Novel
GCA_901248915.1	3	3	458	Unknown/Novel
GCA_901249935.1	3	3	458	16887
GCA_901250535.1	3	3	180	Unknown/Novel
GCA_901251155.1	3	3	180	Unknown/Novel
GCA_901251425.1	3	3	180	Unknown/Novel
GCA_901252045.1	3	3	180	Unknown/Novel
GCA_901252525.1	3	3	458	24689
GCA_901253365.1	3	3	180	Unknown/Novel
GCA_901254825.1	3	3	180	Unknown/Novel
GCA_901256295.1	3	3	180	Unknown/Novel
GCA_901256815.1	3	3	180	Unknown/Novel
GCA_901257345.1	3	3	180	Unknown/Novel
GCA_901258065.1	3	3	180	18336
GCA_901258195.1	3	3	180	Unknown/Novel
GCA_901258475.1	3	3	180	Unknown/Novel
GCA_901259115.1	3	3	1765	22027
GCA_901259135.1	3	3	4735	Unknown/Novel
GCA_901259335.1	3	3	458	18343
GCA_901260425.1	3	3	458	18343
GCA_901260815.1	3	3	180	Unknown/Novel
GCA_901260895.1	3	3	458	16899
GCA_901261305.1	3	3	180	Unknown/Novel
GCA_901261665.1	3	3	505	Unknown/Novel
GCA_901261845.1	3	3	180	Unknown/Novel
GCA_901262685.1	3	3	180	Unknown/Novel
GCA_901263595.1	3	3	458	Unknown/Novel
GCA_901263885.1	3	3	505	Unknown/Novel
GCA_901264455.1	3	3	180	27380
GCA_901265915.1	3	3	505	Unknown/Novel
GCA_901267105.1	3	3	12319	Unknown/Novel
GCA_901268265.1	3	3	180	Unknown/Novel
GCA_901268305.1	3	3	2049	Unknown/Novel
GCA_901268415.1	3	3	180	Unknown/Novel
GCA_901268815.1	3	3	180	Unknown/Novel
GCA_901269625.1	3	3	180	Unknown/Novel
GCA_901270555.1	3	3	180	Unknown/Novel
GCA_901270815.1	3	3	180	Unknown/Novel
GCA_901272195.1	3	3	505	Unknown/Novel
GCA_901273005.1	3	3	458	Unknown/Novel
GCA_901273025.1	3	3	180	Unknown/Novel
GCA_901273155.1	3	3	180	Unknown/Novel
GCA_901273215.1	3	3	458	Unknown/Novel
GCA_901274215.1	3	3	180	Unknown/Novel
GCA_901274855.1	3	3	458	Unknown/Novel
GCA_901275335.1	3	3	180	Unknown/Novel
GCA_901275505.1	3	3	180	Unknown/Novel
GCA_901281705.1	3	3	180	Unknown/Novel
GCA_901282355.1	3	3	10768	Unknown/Novel
GCA_901282415.1	3	3	180	Unknown/Novel
GCA_901282595.1	3	3	180	Unknown/Novel
GCA_901282615.1	3	3	180	Unknown/Novel
GCA_901282975.1	3	3	180	Unknown/Novel
GCA_901283145.1	3	3	180	Unknown/Novel
GCA_901284305.1	3	3	180	Unknown/Novel
GCA_901284995.1	3	3	180	Unknown/Novel
GCA_901285465.1	3	3	180	Unknown/Novel
GCA_901285475.1	3	3	180	Unknown/Novel
GCA_901285515.1	3	3	180	Unknown/Novel
GCA_901285535.1	3	3	180	Unknown/Novel
GCA_901285565.1	3	3	180	Unknown/Novel
GCA_901285585.1	3	3	180	Unknown/Novel
GCA_901286595.1	3	3	458	24678
GCA_901286835.1	3	3	180	Unknown/Novel
GCA_901287635.1	3	3	458	18895
GCA_901287675.1	3	3	180	Unknown/Novel
GCA_901288805.1	3	3	180	Unknown/Novel
GCA_901288965.1	3	3	180	27270
GCA_901289625.1	3	3	180	Unknown/Novel
GCA_901289635.1	3	3	1263	25941
GCA_901289665.1	3	3	6013	Unknown/Novel
GCA_901289725.1	3	3	6011	25887
GCA_901289745.1	3	3	6011	25888
GCA_901289765.1	3	3	180	Unknown/Novel
GCA_901289785.1	3	3	6011	25915
GCA_901290205.1	3	3	180	Unknown/Novel
GCA_901290325.1	3	3	180	Unknown/Novel
GCA_901290765.1	3	3	6011	25884
GCA_901290785.1	3	3	6011	25914
GCA_901291315.1	3	3	6011	25939
GCA_901291445.1	3	3	6945	23846
GCA_901291715.1	3	3	6011	25938
GCA_901291785.1	3	3	6011	25937
GCA_901291945.1	3	3	6011	25913
GCA_901291965.1	3	3	6011	25912
GCA_901292045.1	3	3	6011	25911
GCA_901292105.1	3	3	6011	25910
GCA_901292285.1	3	3	5435	22222
GCA_901292435.1	3	3	505	Unknown/Novel
GCA_901292525.1	3	3	6011	25940
GCA_901293235.1	3	3	458	24685
GCA_901293315.1	3	3	180	Unknown/Novel
GCA_901293335.1	3	3	180	Unknown/Novel
GCA_901293465.1	3	3	180	Unknown/Novel
GCA_901293515.1	3	3	505	Unknown/Novel
GCA_901294035.1	3	3	180	Unknown/Novel
GCA_901294275.1	3	3	180	27300
GCA_901294295.1	3	3	458	24681
GCA_901294615.1	3	3	180	Unknown/Novel
GCA_901295085.1	3	3	180	Unknown/Novel
GCA_901295195.1	3	3	458	24684
GCA_901295625.1	3	3	12489	Unknown/Novel
GCA_901295645.1	3	3	180	27317
GCA_901295735.1	3	3	180	27292
GCA_901295745.1	3	3	458	24680
GCA_901296365.1	3	3	180	27297
GCA_901296735.1	3	3	180	Unknown/Novel
GCA_901296785.1	3	3	11332	24707
GCA_901297125.1	3	3	458	24682
GCA_901297245.1	3	3	180	27295
GCA_901297635.1	3	3	180	Unknown/Novel
GCA_901298525.1	3	3	180	Unknown/Novel
GCA_901298985.1	3	3	180	Unknown/Novel
GCA_901299465.1	3	3	180	27290
GCA_901299755.1	3	3	180	Unknown/Novel
GCA_901299835.1	3	3	505	Unknown/Novel
GCA_901300765.1	3	3	180	Unknown/Novel
GCA_901301145.1	3	3	505	Unknown/Novel
GCA_901302455.1	3	3	505	Unknown/Novel
GCA_901302555.1	3	3	505	Unknown/Novel
GCA_901302745.1	3	3	180	Unknown/Novel
GCA_901303335.1	3	3	180	Unknown/Novel
GCA_901303515.1	3	3	505	Unknown/Novel
GCA_901303715.1	3	3	180	Unknown/Novel
GCA_901304095.1	3	3	180	Unknown/Novel
GCA_901304905.1	3	3	180	Unknown/Novel
GCA_901305025.1	3	3	180	Unknown/Novel
GCA_901305295.1	3	3	180	Unknown/Novel
GCA_901305365.1	3	3	505	Unknown/Novel
GCA_901305675.1	3	3	11931	20996
GCA_901305855.1	3	3	458	24677
GCA_901305945.1	3	3	180	Unknown/Novel
GCA_901306495.1	3	3	180	Unknown/Novel
GCA_901306835.1	3	3	180	Unknown/Novel
GCA_901307165.1	3	3	180	Unknown/Novel
GCA_901307585.1	3	3	180	Unknown/Novel
GCA_901307775.1	3	3	458	18795
GCA_901307915.1	3	3	180	Unknown/Novel
GCA_901308195.1	3	3	180	27330
GCA_901308245.1	3	3	180	Unknown/Novel
GCA_901308695.1	3	3	180	Unknown/Novel
GCA_901308915.1	3	3	180	Unknown/Novel
GCA_901309015.1	3	3	180	27329
GCA_901309225.1	3	3	180	Unknown/Novel
GCA_901309485.1	3	3	180	Unknown/Novel
GCA_901310365.1	3	3	6011	25919
GCA_901310925.1	3	3	458	18830
GCA_901312615.1	3	3	180	Unknown/Novel
GCA_901313135.1	3	3	180	Unknown/Novel
GCA_901313275.1	3	3	458	24688
GCA_901313355.1	3	3	12142	Unknown/Novel
GCA_901313605.1	3	3	180	Unknown/Novel
GCA_901313955.1	3	3	180	Unknown/Novel
GCA_901314015.1	3	3	180	Unknown/Novel
GCA_901314115.1	3	3	12206	Unknown/Novel
GCA_901314135.1	3	3	180	Unknown/Novel
GCA_901314215.1	3	3	12207	21050
GCA_901314255.1	3	3	180	Unknown/Novel
GCA_901314885.1	3	3	180	Unknown/Novel
GCA_901314935.1	3	3	180	Unknown/Novel
GCA_901315135.1	3	3	180	Unknown/Novel
GCA_901316235.1	3	3	458	24679
GCA_901317185.1	3	3	180	Unknown/Novel
GCA_901317445.1	3	3	180	Unknown/Novel
GCA_901318585.1	3	3	180	Unknown/Novel
GCA_901318905.1	3	3	180	Unknown/Novel
GCA_901321305.1	3	3	180	Unknown/Novel
GCA_901321365.1	3	3	180	Unknown/Novel
GCA_901321805.1	3	3	11873	Unknown/Novel
GCA_901322115.1	3	3	3798	Unknown/Novel
GCA_901322195.1	3	3	180	Unknown/Novel
GCA_901322525.1	3	3	12727	Unknown/Novel
GCA_901322705.1	3	3	180	Unknown/Novel
GCA_901325085.1	3	3	7723	Unknown/Novel
GCA_901325675.1	3	3	180	Unknown/Novel
GCA_901326215.1	3	3	180	Unknown/Novel
GCA_901326405.1	3	3	180	Unknown/Novel
GCA_901328035.1	3	3	180	Unknown/Novel
GCA_901328415.1	3	3	180	Unknown/Novel
GCA_901329675.1	3	3	458	24686
GCA_901329925.1	3	3	180	Unknown/Novel
GCA_901329995.1	3	3	180	Unknown/Novel
GCA_901331165.1	3	3	11332	24708
GCA_901331675.1	3	3	180	Unknown/Novel
GCA_901332245.1	3	3	458	24683
GCA_901332405.1	3	3	180	Unknown/Novel
GCA_901332465.1	3	3	180	Unknown/Novel
GCA_901332505.1	3	3	5435	22221
GCA_901332815.1	3	3	180	Unknown/Novel
GCA_901333585.1	3	3	180	Unknown/Novel
GCA_901333745.1	3	3	180	Unknown/Novel
GCA_901334155.1	3	3	180	Unknown/Novel
GCA_901334245.1	3	3	5435	22222
GCA_901334635.1	3	3	180	Unknown/Novel
GCA_901335355.1	3	3	180	Unknown/Novel
GCA_901335905.1	3	3	180	Unknown/Novel
GCA_901337325.1	3	3	6011	25916
GCA_901337505.1	3	3	180	Unknown/Novel
GCA_901337555.1	3	3	6011	25946
GCA_901337725.1	3	3	6011	25976
GCA_901337745.1	3	3	6011	25975
GCA_901339445.1	3	3	180	Unknown/Novel
GCA_901339515.1	3	3	458	Unknown/Novel
GCA_901340785.1	3	3	11454	22009
GCA_901340875.1	3	3	180	Unknown/Novel
GCA_901340895.1	3	3	180	Unknown/Novel
GCA_901340955.1	3	3	458	24687
GCA_901341425.1	3	3	6011	25917
GCA_901343005.1	3	3	180	Unknown/Novel
GCA_901254595.1	3	3	5292	Unknown/Novel
GCA_901258115.1	3	3	5292	Unknown/Novel
GCA_901259865.1	3	3	5292	Unknown/Novel
GCA_901262635.1	3	3	5292	Unknown/Novel
GCA_901262105.1	4	4	2290	17539
GCA_900189015.1	4	4	205	Unknown/Novel
GCA_901256095.1	4	4	2290	Unknown/Novel
GCA_901303815.1	4	4	1729	Unknown/Novel
GCA_900692835.1	4	4	5410	Unknown/Novel
GCA_901235965.1	4	4	695	Unknown/Novel
GCA_901280265.1	4	4	205	Unknown/Novel
GCA_901281045.1	4	4	2290	Unknown/Novel
GCA_901332515.1	4	4	5410	15294
GCA_901339045.1	4	4	2941	18139
GCA_001089165.1	4	4	5120	6198
GCA_001095805.1	4	4	3784	Unknown/Novel
GCA_001098205.1	4	4	3784	6330
GCA_001102625.1	4	4	5120	6379
GCA_001102925.1	4	4	5120	6161
GCA_001112625.1	4	4	2213	6323
GCA_001116965.1	4	4	6688	5877
GCA_001121165.1	4	4	5120	5881
GCA_001133085.1	4	4	5120	6088
GCA_001143425.1	4	4	5099	5883
GCA_001161665.1	4	4	5120	6239
GCA_001166105.1	4	4	5099	5976
GCA_001173625.1	4	4	5120	6221
GCA_001174565.1	4	4	5120	5952
GCA_001202995.1	4	4	5120	6110
GCA_001334795.1	4	4	5120	5927
GCA_001335635.1	4	4	5120	Unknown/Novel
GCA_001339355.1	4	4	5099	Unknown/Novel
GCA_001342595.1	4	4	5120	6051
GCA_001345855.1	4	4	5120	6324
GCA_900049745.1	4	4	2213	Unknown/Novel
GCA_900051625.1	4	4	2213	Unknown/Novel
GCA_900053545.2	4	4	899	24352
GCA_901213355.1	4	4	205	Unknown/Novel
GCA_901213435.1	4	4	2213	Unknown/Novel
GCA_901213545.1	4	4	899	24353
GCA_901215145.1	4	4	206	26799
GCA_901215595.1	4	4	5465	21442
GCA_901215965.1	4	4	206	Unknown/Novel
GCA_901216505.1	4	4	2213	23677
GCA_901216785.1	4	4	2213	23676
GCA_901216795.1	4	4	9554	23703
GCA_901217105.1	4	4	9197	17638
GCA_901217905.1	4	4	2213	Unknown/Novel
GCA_901218065.1	4	4	2213	Unknown/Novel
GCA_901219225.1	4	4	1729	Unknown/Novel
GCA_901220215.1	4	4	5410	17721
GCA_901221625.1	4	4	205	Unknown/Novel
GCA_901222865.1	4	4	10612	16267
GCA_901223965.1	4	4	5410	Unknown/Novel
GCA_901224205.1	4	4	5410	18525
GCA_901225395.1	4	4	5410	18525
GCA_901226635.1	4	4	10612	17732
GCA_901227115.1	4	4	244	Unknown/Novel
GCA_901227295.1	4	4	205	Unknown/Novel
GCA_901229215.1	4	4	899	Unknown/Novel
GCA_901231145.1	4	4	695	24314
GCA_901231245.1	4	4	853	Unknown/Novel
GCA_901231475.1	4	4	205	Unknown/Novel
GCA_901232055.1	4	4	205	26777
GCA_901234115.1	4	4	2213	Unknown/Novel
GCA_901234295.1	4	4	244	Unknown/Novel
GCA_901234395.1	4	4	899	Unknown/Novel
GCA_901234885.1	4	4	695	Unknown/Novel
GCA_901235455.1	4	4	2213	Unknown/Novel
GCA_901235635.1	4	4	5410	Unknown/Novel
GCA_901236075.1	4	4	205	26796
GCA_901236815.1	4	4	5410	Unknown/Novel
GCA_901237215.1	4	4	205	Unknown/Novel
GCA_901238425.1	4	4	7376	Unknown/Novel
GCA_901238875.1	4	4	5410	15594
GCA_901239305.1	4	4	5410	18219
GCA_901240365.1	4	4	2290	23589
GCA_901241685.1	4	4	2213	23690
GCA_901242375.1	4	4	695	Unknown/Novel
GCA_901242565.1	4	4	695	Unknown/Novel
GCA_901243285.1	4	4	205	Unknown/Novel
GCA_901243895.1	4	4	695	24342
GCA_901243975.1	4	4	853	Unknown/Novel
GCA_901244485.1	4	4	9557	Unknown/Novel
GCA_901244925.1	4	4	244	21039
GCA_901245445.1	4	4	695	31458
GCA_901246085.1	4	4	695	Unknown/Novel
GCA_901246475.1	4	4	695	24306
GCA_901248885.1	4	4	12571	Unknown/Novel
GCA_901249925.1	4	4	205	Unknown/Novel
GCA_901250795.1	4	4	2712	Unknown/Novel
GCA_901251665.1	4	4	899	Unknown/Novel
GCA_901252005.1	4	4	5660	Unknown/Novel
GCA_901252345.1	4	4	246	Unknown/Novel
GCA_901252905.1	4	4	12306	15154
GCA_901253105.1	4	4	695	24305
GCA_901254005.1	4	4	205	Unknown/Novel
GCA_901254335.1	4	4	9197	23506
GCA_901256945.1	4	4	5410	55559
GCA_901257285.1	4	4	695	24323
GCA_901257365.1	4	4	12573	Unknown/Novel
GCA_901257525.1	4	4	695	Unknown/Novel
GCA_901257575.1	4	4	247	25945
GCA_901257745.1	4	4	205	Unknown/Novel
GCA_901257815.1	4	4	695	Unknown/Novel
GCA_901258005.1	4	4	899	24348
GCA_901258585.1	4	4	205	Unknown/Novel
GCA_901259055.1	4	4	695	Unknown/Novel
GCA_901259235.1	4	4	5410	Unknown/Novel
GCA_901259275.1	4	4	5410	Unknown/Novel
GCA_901259525.1	4	4	5410	15897
GCA_901259685.1	4	4	205	Unknown/Novel
GCA_901260435.1	4	4	205	26786
GCA_901260905.1	4	4	695	24337
GCA_901261275.1	4	4	5410	55544
GCA_901261355.1	4	4	2213	23699
GCA_901261695.1	4	4	9561	Unknown/Novel
GCA_901263525.1	4	4	695	24336
GCA_901263895.1	4	4	899	Unknown/Novel
GCA_901264235.1	4	4	695	24335
GCA_901264475.1	4	4	9934	Unknown/Novel
GCA_901265105.1	4	4	1729	Unknown/Novel
GCA_901267865.1	4	4	205	Unknown/Novel
GCA_901267955.1	4	4	5410	18525
GCA_901269905.1	4	4	2213	Unknown/Novel
GCA_901270385.1	4	4	2290	Unknown/Novel
GCA_901270495.1	4	4	1729	Unknown/Novel
GCA_901272175.1	4	4	5410	15943
GCA_901272285.1	4	4	1729	Unknown/Novel
GCA_901272445.1	4	4	1729	Unknown/Novel
GCA_901273165.1	4	4	2213	23699
GCA_901274625.1	4	4	2213	Unknown/Novel
GCA_901280085.1	4	4	2712	Unknown/Novel
GCA_901281285.1	4	4	10612	17690
GCA_901282145.1	4	4	5410	Unknown/Novel
GCA_901282775.1	4	4	2290	Unknown/Novel
GCA_901283445.1	4	4	12539	Unknown/Novel
GCA_901283675.1	4	4	205	16128
GCA_901284175.1	4	4	5410	55555
GCA_901284675.1	4	4	13938	21949
GCA_901285205.1	4	4	13938	21948
GCA_901285265.1	4	4	205	26781
GCA_901287715.1	4	4	2213	23679
GCA_901288315.1	4	4	2213	23681
GCA_901288335.1	4	4	2213	23680
GCA_901289245.1	4	4	205	26779
GCA_901289425.1	4	4	13941	23705
GCA_901290665.1	4	4	7026	21538
GCA_901291545.1	4	4	13938	21952
GCA_901294445.1	4	4	7071	22940
GCA_901294665.1	4	4	247	24290
GCA_901301345.1	4	4	2213	23688
GCA_901302785.1	4	4	2213	23685
GCA_901303705.1	4	4	2213	23684
GCA_901304945.1	4	4	247	Unknown/Novel
GCA_901304985.1	4	4	7026	21539
GCA_901305575.1	4	4	13938	21954
GCA_901305885.1	4	4	205	26785
GCA_901306745.1	4	4	2213	23686
GCA_901308365.1	4	4	205	Unknown/Novel
GCA_901309085.1	4	4	205	Unknown/Novel
GCA_901309625.1	4	4	244	Unknown/Novel
GCA_901310175.1	4	4	899	Unknown/Novel
GCA_901311945.1	4	4	695	Unknown/Novel
GCA_901313735.1	4	4	13938	21951
GCA_901314355.1	4	4	5410	Unknown/Novel
GCA_901317675.1	4	4	770	21130
GCA_901317965.1	4	4	7370	18918
GCA_901318555.1	4	4	13944	21953
GCA_901319715.1	4	4	5410	Unknown/Novel
GCA_901320125.1	4	4	1729	15206
GCA_901321735.1	4	4	3784	Unknown/Novel
GCA_901323685.1	4	4	9443	21644
GCA_901324135.1	4	4	1729	Unknown/Novel
GCA_901325095.1	4	4	2213	23689
GCA_901325195.1	4	4	1729	Unknown/Novel
GCA_901325405.1	4	4	2213	23687
GCA_901328375.1	4	4	13954	21950
GCA_901329415.1	4	4	205	26782
GCA_901329945.1	4	4	5410	Unknown/Novel
GCA_901330065.1	4	4	7071	22939
GCA_901331115.1	4	4	2213	23678
GCA_901332895.1	4	4	205	26780
GCA_901334955.1	4	4	5410	19382
GCA_901335135.1	4	4	2213	23683
GCA_901335195.1	4	4	7376	18115
GCA_901335615.1	4	4	853	22830
GCA_901336895.1	4	4	853	Unknown/Novel
GCA_901337445.1	4	4	5410	55681
GCA_901338255.1	4	4	5660	Unknown/Novel
GCA_901340645.1	4	4	2213	Unknown/Novel
GCA_901341135.1	4	4	2213	23682
GCA_901341755.1	4	4	2213	23693
GCA_901342645.1	4	4	12744	Unknown/Novel
GCA_901342725.1	4	4	2213	Unknown/Novel
GCA_901312845.1	4	4	6352	21526
GCA_901218025.1	4	4	1222	Unknown/Novel
GCA_901246225.1	4	4	1222	Unknown/Novel
GCA_901316335.1	4	4	1222	16440
GCA_901333515.1	4	4	7105	Unknown/Novel
GCA_901333945.1	4	4	7105	22481
GCA_900692715.1	4	4	1221	15460
GCA_901215315.1	4	4	1221	15460
GCA_901217375.1	4	4	5410	Unknown/Novel
GCA_901218745.1	4	4	11000	Unknown/Novel
GCA_901220905.1	4	4	9443	31242
GCA_901221685.1	4	4	1221	18160
GCA_901223355.1	4	4	1221	16781
GCA_901223425.1	4	4	5410	22932
GCA_901224895.1	4	4	1221	21163
GCA_901225565.1	4	4	5410	Unknown/Novel
GCA_901226195.1	4	4	1221	Unknown/Novel
GCA_901227085.1	4	4	1221	16792
GCA_901227275.1	4	4	1221	16178
GCA_901231155.1	4	4	7370	55549
GCA_901233915.1	4	4	1221	16807
GCA_901234845.1	4	4	11024	22179
GCA_901235385.1	4	4	1221	18176
GCA_901238135.1	4	4	1221	Unknown/Novel
GCA_901240535.1	4	4	1221	Unknown/Novel
GCA_901241715.1	4	4	1221	Unknown/Novel
GCA_901241985.1	4	4	1221	Unknown/Novel
GCA_901243025.1	4	4	1221	16346
GCA_901243505.1	4	4	1221	Unknown/Novel
GCA_901245125.1	4	4	1221	Unknown/Novel
GCA_901246165.1	4	4	1221	15795
GCA_901246915.1	4	4	1221	16539
GCA_901247295.1	4	4	1221	17747
GCA_901248975.1	4	4	1221	Unknown/Novel
GCA_901249605.1	4	4	2712	23702
GCA_901249695.1	4	4	1221	Unknown/Novel
GCA_901254385.1	4	4	1221	17528
GCA_901254905.1	4	4	1221	21156
GCA_901255115.1	4	4	1221	21164
GCA_901255875.1	4	4	1221	15321
GCA_901256685.1	4	4	1221	Unknown/Novel
GCA_901256865.1	4	4	1221	17532
GCA_901259095.1	4	4	1221	15895
GCA_901259695.1	4	4	1221	Unknown/Novel
GCA_901261095.1	4	4	2712	Unknown/Novel
GCA_901261375.1	4	4	1221	15336
GCA_901261475.1	4	4	1221	Unknown/Novel
GCA_901263165.1	4	4	1221	21160
GCA_901263455.1	4	4	1221	Unknown/Novel
GCA_901267905.1	4	4	1221	21161
GCA_901268095.1	4	4	10916	Unknown/Novel
GCA_901269975.1	4	4	1221	21159
GCA_901270685.1	4	4	1221	Unknown/Novel
GCA_901273625.1	4	4	1221	Unknown/Novel
GCA_901277485.1	4	4	1221	17806
GCA_901277705.1	4	4	5410	Unknown/Novel
GCA_901278105.1	4	4	1221	15842
GCA_901278925.1	4	4	5410	Unknown/Novel
GCA_901279225.1	4	4	5410	55550
GCA_901279435.1	4	4	11734	Unknown/Novel
GCA_901279495.1	4	4	1221	Unknown/Novel
GCA_901279665.1	4	4	11734	Unknown/Novel
GCA_901280185.1	4	4	1221	16077
GCA_901281425.1	4	4	5410	16092
GCA_901281795.1	4	4	5410	Unknown/Novel
GCA_901283025.1	4	4	1221	Unknown/Novel
GCA_901283765.1	4	4	1221	15695
GCA_901283785.1	4	4	1221	Unknown/Novel
GCA_901285625.1	4	4	2036	22175
GCA_901287505.1	4	4	1221	Unknown/Novel
GCA_901287615.1	4	4	1221	21154
GCA_901291865.1	4	4	12500	22029
GCA_901293775.1	4	4	770	21126
GCA_901297325.1	4	4	801	24039
GCA_901297405.1	4	4	801	24038
GCA_901299825.1	4	4	770	Unknown/Novel
GCA_901302715.1	4	4	12202	Unknown/Novel
GCA_901303565.1	4	4	9438	22174
GCA_901304715.1	4	4	12400	20999
GCA_901305115.1	4	4	12401	23132
GCA_901306015.1	4	4	5872	21041
GCA_901309415.1	4	4	5410	Unknown/Novel
GCA_901310145.1	4	4	6832	Unknown/Novel
GCA_901311025.1	4	4	770	21129
GCA_901311045.1	4	4	2036	22176
GCA_901311895.1	4	4	770	21128
GCA_901313725.1	4	4	1221	Unknown/Novel
GCA_901314645.1	4	4	1221	16424
GCA_901319045.1	4	4	1221	Unknown/Novel
GCA_901319315.1	4	4	1221	Unknown/Novel
GCA_901319435.1	4	4	5410	55585
GCA_901319605.1	4	4	7370	Unknown/Novel
GCA_901320115.1	4	4	5410	Unknown/Novel
GCA_901322325.1	4	4	4127	Unknown/Novel
GCA_901328185.1	4	4	770	21127
GCA_901328915.1	4	4	1221	Unknown/Novel
GCA_901330205.1	4	4	1221	16876
GCA_901330505.1	4	4	10839	22177
GCA_901333255.1	4	4	5410	55630
GCA_901334175.1	4	4	5410	22934
GCA_901335165.1	4	4	5410	22933
GCA_901227855.1	4	4	5410	55632
GCA_901239715.1	4	4	7370	Unknown/Novel
GCA_901246555.1	4	4	205	Unknown/Novel
GCA_901276665.1	4	4	1022	20955
GCA_901278085.1	4	4	10757	Unknown/Novel
GCA_900060265.2	4	4	10173	21704
GCA_901328315.1	5	5	289	25675
GCA_900054625.1	5	5	289	Unknown/Novel
GCA_901226555.1	5	5	5659	Unknown/Novel
GCA_901256885.1	5	5	289	Unknown/Novel
GCA_901291395.1	5	5	289	25680
GCA_901307465.1	5	5	289	Unknown/Novel
GCA_001101105.1	5	5	5094	Unknown/Novel
GCA_001107625.1	5	5	289	6272
GCA_001134385.1	5	5	289	6287
GCA_001144885.1	5	5	289	6343
GCA_001159325.1	5	5	289	6252
GCA_001204335.1	5	5	289	6069
GCA_001334875.1	5	5	5094	Unknown/Novel
GCA_900051635.1	5	5	289	Unknown/Novel
GCA_901214945.1	5	5	289	25573
GCA_901216815.1	5	5	289	25564
GCA_901225375.1	5	5	289	Unknown/Novel
GCA_901227865.1	5	5	289	25557
GCA_901251545.1	5	5	289	25800
GCA_901257035.1	5	5	3339	Unknown/Novel
GCA_901259415.1	5	5	289	25799
GCA_901261325.1	5	5	289	Unknown/Novel
GCA_901262615.1	5	5	289	Unknown/Novel
GCA_901264335.1	5	5	289	Unknown/Novel
GCA_901264765.1	5	5	289	Unknown/Novel
GCA_901266125.1	5	5	289	25751
GCA_901272085.1	5	5	289	Unknown/Novel
GCA_901275465.1	5	5	289	25793
GCA_901284705.1	5	5	289	25616
GCA_901290175.1	5	5	289	Unknown/Novel
GCA_901290775.1	5	5	289	25749
GCA_901292305.1	5	5	289	25679
GCA_901294245.1	5	5	4219	Unknown/Novel
GCA_901313865.1	5	5	289	25640
GCA_901314465.1	5	5	289	25637
GCA_901323645.1	5	5	10999	21763
GCA_901330515.1	5	5	4219	34745
GCA_901333645.1	5	5	289	Unknown/Novel
GCA_901334865.1	5	5	289	Unknown/Novel
GCA_901335235.1	5	5	289	Unknown/Novel
GCA_901341415.1	5	5	3404	Unknown/Novel
GCA_901341615.1	5	5	289	Unknown/Novel
GCA_900051645.1	5	5	289	Unknown/Novel
GCA_900052035.1	5	5	289	25569
GCA_901213125.1	5	5	289	Unknown/Novel
GCA_901213715.1	5	5	7050	25864
GCA_901214035.1	5	5	3339	Unknown/Novel
GCA_901214245.1	5	5	9935	Unknown/Novel
GCA_901214585.1	5	5	289	25571
GCA_901214595.1	5	5	3404	Unknown/Novel
GCA_901214635.1	5	5	289	25568
GCA_901214695.1	5	5	289	33048
GCA_901214735.1	5	5	3404	25553
GCA_901214745.1	5	5	3404	25554
GCA_901214845.1	5	5	289	25574
GCA_901214865.1	5	5	289	25806
GCA_901215015.1	5	5	289	25572
GCA_901215215.1	5	5	289	25570
GCA_901215355.1	5	5	289	25569
GCA_901215715.1	5	5	289	32152
GCA_901215935.1	5	5	Unknown	55442
GCA_901216065.1	5	5	289	33267
GCA_901216125.1	5	5	Unknown	55443
GCA_901217245.1	5	5	289	25745
GCA_901217405.1	5	5	289	25563
GCA_901218195.1	5	5	5659	Unknown/Novel
GCA_901220505.1	5	5	5659	Unknown/Novel
GCA_901221035.1	5	5	7050	25871
GCA_901221385.1	5	5	5659	25855
GCA_901221815.1	5	5	289	25774
GCA_901222805.1	5	5	3404	Unknown/Novel
GCA_901223015.1	5	5	3339	Unknown/Novel
GCA_901223685.1	5	5	5659	Unknown/Novel
GCA_901224255.1	5	5	7050	31217
GCA_901225625.1	5	5	289	25772
GCA_901226285.1	5	5	289	Unknown/Novel
GCA_901229125.1	5	5	3404	25810
GCA_901230105.1	5	5	7050	Unknown/Novel
GCA_901231595.1	5	5	3404	25551
GCA_901232755.1	5	5	5659	Unknown/Novel
GCA_901234285.1	5	5	7050	25869
GCA_901237625.1	5	5	5659	15770
GCA_901239215.1	5	5	7050	Unknown/Novel
GCA_901239845.1	5	5	289	25759
GCA_901240325.1	5	5	5659	16524
GCA_901240525.1	5	5	5659	Unknown/Novel
GCA_901240755.1	5	5	289	Unknown/Novel
GCA_901240945.1	5	5	5659	18071
GCA_901241665.1	5	5	5659	Unknown/Novel
GCA_901241735.1	5	5	5659	Unknown/Novel
GCA_901243705.1	5	5	7050	25882
GCA_901243855.1	5	5	5659	16508
GCA_901243935.1	5	5	289	Unknown/Novel
GCA_901244735.1	5	5	289	Unknown/Novel
GCA_901244795.1	5	5	289	Unknown/Novel
GCA_901245075.1	5	5	289	33048
GCA_901246305.1	5	5	5659	15372
GCA_901246465.1	5	5	7050	Unknown/Novel
GCA_901246545.1	5	5	5659	16537
GCA_901247465.1	5	5	289	16585
GCA_901249285.1	5	5	7050	Unknown/Novel
GCA_901249295.1	5	5	7050	Unknown/Novel
GCA_901250365.1	5	5	5659	15387
GCA_901250715.1	5	5	5659	25861
GCA_901251835.1	5	5	3404	25847
GCA_901252035.1	5	5	7050	15309
GCA_901252355.1	5	5	5659	17575
GCA_901252785.1	5	5	5659	16316
GCA_901252855.1	5	5	5659	Unknown/Novel
GCA_901253185.1	5	5	3404	25849
GCA_901253465.1	5	5	5659	Unknown/Novel
GCA_901253505.1	5	5	7050	Unknown/Novel
GCA_901254865.1	5	5	7050	25870
GCA_901255835.1	5	5	3339	25812
GCA_901255895.1	5	5	289	25790
GCA_901256215.1	5	5	5659	Unknown/Novel
GCA_901256485.1	5	5	289	Unknown/Novel
GCA_901256625.1	5	5	5659	Unknown/Novel
GCA_901256715.1	5	5	289	25769
GCA_901257125.1	5	5	289	25767
GCA_901257405.1	5	5	5659	Unknown/Novel
GCA_901257615.1	5	5	3404	Unknown/Novel
GCA_901257685.1	5	5	3404	Unknown/Novel
GCA_901258365.1	5	5	289	Unknown/Novel
GCA_901258635.1	5	5	5659	Unknown/Novel
GCA_901258745.1	5	5	289	Unknown/Novel
GCA_901259835.1	5	5	289	Unknown/Novel
GCA_901259875.1	5	5	3404	25848
GCA_901261825.1	5	5	289	16585
GCA_901262395.1	5	5	289	Unknown/Novel
GCA_901262665.1	5	5	5659	15338
GCA_901263375.1	5	5	3339	25822
GCA_901263815.1	5	5	5659	Unknown/Novel
GCA_901263855.1	5	5	3339	25821
GCA_901264095.1	5	5	3339	Unknown/Novel
GCA_901264225.1	5	5	3404	Unknown/Novel
GCA_901264535.1	5	5	3404	Unknown/Novel
GCA_901264585.1	5	5	3404	Unknown/Novel
GCA_901264885.1	5	5	3339	Unknown/Novel
GCA_901265035.1	5	5	3404	25845
GCA_901265095.1	5	5	3404	Unknown/Novel
GCA_901265235.1	5	5	7050	16596
GCA_901265245.1	5	5	3404	25844
GCA_901265845.1	5	5	3404	Unknown/Novel
GCA_901266325.1	5	5	3404	Unknown/Novel
GCA_901266985.1	5	5	289	25764
GCA_901267355.1	5	5	289	25763
GCA_901268295.1	5	5	289	25805
GCA_901268555.1	5	5	289	Unknown/Novel
GCA_901268685.1	5	5	5659	Unknown/Novel
GCA_901269665.1	5	5	289	Unknown/Novel
GCA_901270255.1	5	5	289	Unknown/Novel
GCA_901270615.1	5	5	3339	25817
[truncated: 15,409 more rows]

## Sheet: Table S8
Table S8 The STs associated with each serotype
Serotype	ST number*	ST information	Peresentive ST	Genome number for peresentive ST	Total genomes	ST|number for ST
1	≥47	10649|10996|11046|11104|11740|11743|11745|12150|12165|12333|12470|12546|12556|12739|12781|13923|2084|217|227|2296|3018|303|304|306|3081|3575|3579|3581|4288|4752|5002|5012|5044|5191|5316|5784|5802|611|612|615|618|6983|8158|8314|9067|9231|9529|Unknown	217	458	965	10649|2,10996|1,11046|1,11104|1,11740|2,11743|3,11745|16,12150|1,12165|1,12333|1,12470|2,12546|1,12556|1,12739|1,12781|1,13923|1,2084|2,217|458,227|31,2296|3,3018|1,303|55,304|50,306|34,3081|110,3575|2,3579|1,3581|2,4288|1,4752|1,5002|6,5012|6,5044|1,5191|1,5316|1,5784|13,5802|7,611|3,612|58,615|6,618|41,6983|6,8158|7,8314|7,9067|10,9231|1,9529|3,Unknown|1
2	6	11692|1504|3744|574|74|9476	74	16	38	11692|2,1504|12,3744|1,574|1,74|16,9476|6
3	≥65	10179|10440|10441|10455|10606|10768|11128|1116|11332|11454|11686|11873|11931|12142|1220|12206|12207|12319|12489|12523|12590|12606|1263|12727|12734|12780|1377|16511|16512|16513|16614|172|1765|180|1826|2021|2049|232|260|271|3214|378|3798|4389|458|4655|4735|505|5292|5435|6011|6012|6013|6014|62|6360|662|6945|700|7053|7369|7545|7723|8799|9060|Unknown	180	264	544	10179|1,10440|1,10441|1,10455|1,10606|2,10768|1,11128|1,1116|2,11332|2,11454|1,11686|1,11873|1,11931|1,12142|1,1220|5,12206|1,12207|1,12319|1,12489|1,12523|1,12590|1,12606|1,1263|1,12727|1,12734|1,12780|1,1377|2,16511|1,16512|1,16513|1,16614|1,172|1,1765|3,180|264,1826|1,2021|1,2049|1,232|2,260|8,271|2,3214|2,378|1,3798|1,4389|23,458|86,4655|4,4735|1,505|14,5292|4,5435|4,6011|19,6012|11,6013|1,60…
4	63	10173|1022|10612|10757|10839|10916|11000|11024|11734|12202|1221|1222|12306|12400|12401|12500|12539|12571|12573|12744|13938|13941|13944|13954|1729|2036|205|206|2213|2290|244|246|247|2712|2941|3784|4127|5099|5120|5410|5465|5660|5872|6352|6688|6832|695|7026|7071|7105|7370|7376|770|801|853|899|9197|9438|9443|9554|9557|9561|9934	1221	53	298	10173|1,1022|1,10612|3,10757|1,10839|1,10916|1,11000|1,11024|1,11734|2,12202|1,1221|53,1222|3,12306|1,12400|1,12401|1,12500|1,12539|1,12571|1,12573|1,12744|1,13938|5,13941|1,13944|1,13954|1,1729|9,2036|2,205|26,206|2,2213|30,2290|6,244|4,246|1,247|3,2712|4,2941|1,3784|3,4127|1,5099|3,5120|13,5410|39,5465|1,5660|2,5872|1,6352|1,6688|1,6832|1,695|18,7026|2,7071|2,7105|2,7370|4,7376|2,770|6,801|2,85…
5	≥12	10999|245|289|3339|3404|3844|4219|5094|5659|7050|7222|9935|Unknown	289	262	400	10999|1,245|5,289|262,3339|14,3404|33,3844|1,4219|2,5094|2,5659|47,7050|29,7222|1,9935|1,Unknown|2
06A	≥238	10031|10056|10419|10550|10555|10582|10596|10611|10630|10640|10656|10664|10671|10681|10691|10692|10701|10708|10713|10718|10723|10729|10736|10748|10749|10750|10755|10773|10780|10785|10801|10809|10820|10830|10835|10836|10844|10847|10899|10913|10915|10934|1094|10948|1096|11035|11043|11091|11099|11117|11121|11123|11125|11305|11310|11312|11700|11704|11918|12131|12205|12225|12227|12338|12353|12471|12493…	1094	92	1018	10031|2,10056|2,10419|1,10550|1,10555|1,10582|4,10596|1,10611|3,10630|1,10640|2,10656|2,10664|2,10671|2,10681|1,10691|1,10692|1,10701|1,10708|1,10713|1,10718|1,10723|1,10729|1,10736|1,10748|1,10749|1,10750|4,10755|1,10773|1,10780|1,10785|1,10801|4,10809|1,10820|1,10830|1,10835|1,10836|1,10844|1,10847|1,10899|2,10913|1,10915|1,10934|1,1094|92,10948|1,1096|12,11035|1,11043|1,11091|1,11099|1,11117|1…
06B	≥257	10032|10035|10057|10058|10059|10060|10291|10398|10546|10576|10613|10631|10659|10660|10661|10672|10682|10686|10700|10707|10720|10725|10726|10742|10743|10751|10760|10763|10770|10772|10775|10788|10791|10807|10808|10815|10818|10841|10845|10846|10871|10884|10886|10904|10912|1092|10937|1094|10959|10965|10976|10984|11067|11088|1121|11237|1129|11315|11689|11693|11695|11709|11719|11751|11753|11759|11762|1…	90	163	1231	10032|7,10035|3,10057|1,10058|1,10059|1,10060|1,10291|1,10398|2,10546|13,10576|1,10613|1,10631|2,10659|1,10660|2,10661|1,10672|2,10682|1,10686|1,10700|1,10707|1,10720|1,10725|1,10726|1,10742|1,10743|1,10751|1,10760|1,10763|1,10770|1,10772|1,10775|3,10788|2,10791|1,10807|1,10808|1,10815|1,10818|1,10841|1,10845|1,10846|1,10871|1,10884|1,10886|1,10904|1,10912|1,1092|6,10937|1,1094|4,10959|1,10965|1,…
06C	≥70	10027|10030|1014|10364|10717|10767|1092|11033|11048|11213|1150|12128|12378|12482|12792|12798|1292|1379|138|1390|1600|1669|1692|1714|1937|2185|2754|2777|2912|338|3531|3751|386|3930|395|398|4420|4441|4542|4581|473|4879|490|5109|5124|5228|5464|547|5470|5501|5611|6209|6311|639|6769|6807|6880|7345|7420|7423|76|7647|7711|8003|8004|8028|9455|9685|982|9907|Unknown	1692|4420	33	280	10027|4,10030|2,1014|1,10364|3,10717|1,10767|1,1092|3,11033|1,11048|1,11213|1,1150|3,12128|1,12378|1,12482|1,12792|1,12798|1,1292|9,1379|17,138|4,1390|26,1600|1,1669|4,1692|33,1714|10,1937|1,2185|9,2754|1,2777|5,2912|2,338|1,3531|1,3751|1,386|8,3930|1,395|3,398|3,4420|33,4441|1,4542|1,4581|1,473|6,4879|1,490|1,5109|4,5124|1,5228|8,5464|3,547|2,5470|1,5501|1,5611|6,6209|1,6311|1,639|2,6769|1,6807|…
06D	4	11042|1717|3460|6148	1717	7	11	11042|1,1717|7,3460|1,6148|2
07A	1	191	191	1	1	191|1
07B	8	12794|12801|1553|1701|230|3133|337|7180	1701	9	26	12794|1,12801|1,1553|5,1701|9,230|2,3133|4,337|3,7180|1
07C	30	10587|10614|10639|10645|10666|10945|11126|11127|11713|11742|12178|12312|1535|1797|199|2054|2758|3162|4104|4956|5468|6809|7053|7105|737|7403|7485|7637|8006|8838	4956	27	110	10587|12,10614|1,10639|2,10645|2,10666|3,10945|1,11126|1,11127|1,11713|2,11742|2,12178|1,12312|1,1535|7,1797|4,199|1,2054|1,2758|2,3162|2,4104|2,4956|27,5468|4,6809|1,7053|7,7105|9,737|3,7403|1,7485|1,7637|1,8006|1,8838|7
07F	≥30	10675|10765|10792|11522|11728|1176|11769|11901|11915|12151|12820|12951|1589|191|2178|218|2331|2416|3544|3545|3735|5027|5067|5455|5782|7048|7141|7210|8672|9531|Unknown	191	177	287	10675|3,10765|1,10792|1,11522|1,11728|2,1176|15,11769|4,11901|3,11915|1,12151|1,12820|1,12951|1,1589|2,191|177,2178|11,218|10,2331|1,2416|1,3544|14,3545|12,3735|1,5027|3,5067|1,5455|1,5782|1,7048|4,7141|2,7210|1,8672|9,9531|1,Unknown|1
8	29	10155|10852|10868|11074|12148|12156|12542|12547|12574|1268|12793|12823|13914|1480|2233|2234|2331|2894|3406|3714|3778|3847|404|4202|4216|4654|53|6022|6197	53	125	210	10155|1,10852|1,10868|3,11074|1,12148|1,12156|1,12542|1,12547|1,12574|3,1268|4,12793|1,12823|1,13914|1,1480|11,2233|1,2234|2,2331|2,2894|2,3406|5,3714|1,3778|1,3847|16,404|1,4202|1,4216|9,4654|9,53|125,6022|3,6197|1
09A	2	10966|312	10966	2	3	10966|2,312|1
09L	18	11051|11677|11703|11705|12325|12799|12818|13891|1735|4108|5873|6106|7518|7635|9460|9471|9486|novel13	4108	16	43	11051|1,11677|1,11703|2,11705|5,12325|1,12799|1,12818|1,13891|2,1735|1,4108|16,5873|1,6106|1,7518|2,7635|1,9460|3,9471|2,9486|1,novel13|1
09N	22	10642|10657|10961|11683|12233|1257|12610|12703|13897|3983|405|4666|4856|517|5624|632|66|71|7205|738|7600|8809	66	34	110	10642|2,10657|2,10961|1,11683|6,12233|1,1257|5,12610|1,12703|1,13897|1,3983|19,405|4,4666|1,4856|1,517|5,5624|17,632|4,66|34,71|1,7205|1,738|1,7600|1,8809|1
09V	≥69	10753|10789|10797|10874|10876|10901|10944|10966|11680|11758|11778|1184|11921|1206|123|12326|12532|12554|12558|12567|1263|1269|12758|1357|13912|13921|13929|13937|1557|156|1569|162|165|166|1857|1871|239|2739|280|334|3454|4084|4128|4221|4424|466|4881|4908|5408|5492|5719|5778|5902|6053|6314|6317|643|6530|7058|7059|706|7664|7889|8038|8138|8763|9473|989|Unknown|novel17	156	113	462	10753|1,10789|1,10797|1,10874|1,10876|1,10901|1,10944|1,10966|2,11680|1,11758|10,11778|8,1184|1,11921|3,1206|1,123|1,12326|1,12532|1,12554|1,12558|1,12567|1,1263|3,1269|8,12758|1,1357|1,13912|1,13921|10,13929|1,13937|1,1557|1,156|113,1569|1,162|84,165|1,166|1,1857|1,1871|2,239|18,2739|3,280|30,334|1,3454|17,4084|1,4128|1,4221|2,4424|3,466|1,4881|30,4908|8,5408|6,5492|1,5719|1,5778|7,5902|12,6053|…
10A	≥65	10177|10513|10517|10685|10687|10824|10864|10866|10910|10938|10954|10977|10978|10983|10997|11021|11050|11052|11690|11903|12124|12282|12498|12499|12531|1263|12705|12741|1282|13898|13917|13920|13930|13953|1497|1551|2068|3135|3290|3617|3735|4113|461|4753|5472|5483|5521|5527|5578|5658|585|5876|7054|7115|742|7422|7533|8157|816|8821|8825|9055|9509|9661|97|Unknown	97	26	233	10177|1,10513|2,10517|9,10685|1,10687|1,10824|1,10864|1,10866|1,10910|1,10938|1,10954|1,10977|1,10978|1,10983|1,10997|4,11021|1,11050|1,11052|2,11690|8,11903|1,12124|1,12282|1,12498|1,12499|1,12531|1,1263|1,12705|1,12741|1,1282|1,13898|2,13917|1,13920|1,13930|1,13953|1,1497|2,1551|2,2068|15,3135|6,3290|1,3617|1,3735|1,4113|15,461|2,4753|2,5472|4,5483|5,5521|21,5527|1,5578|5,5658|1,585|5,5876|1,70…
10B	16	10551|10555|10892|11777|11781|12180|12182|13903|16529|3735|5466|5505|6524|7055|7450|9475	7055	28	93	10551|3,10555|1,10892|1,11777|1,11781|2,12180|1,12182|2,13903|1,16529|3,3735|23,5466|2,5505|4,6524|19,7055|28,7450|1,9475|1
10C	1	12320	12320	1	1	12320|1
10F	10	10534|10586|12491|3735|5422|7186|7451|8151|909|9174	10534	10	26	10534|10,10586|3,12491|1,3735|5,5422|2,7186|1,7451|1,8151|1,909|1,9174|1
11A	≥71	1012|10477|10480|1050|10505|10547|10568|10597|10633|10677|10694|10734|10771|10803|10856|10906|10920|10931|10968|10991|11008|11061|11078|11083|11108|11110|11801|11902|12179|12252|12309|12313|12315|12321|12328|12337|12343|12575|12583|1262|12715|12735|12755|13871|156|1913|193|2052|2059|2722|3000|3276|4019|4063|408|4661|4883|4984|5537|5667|5722|5902|6025|62|6444|8817|8989|9137|9517|9750|99|Unknown	62	141	402	1012|2,10477|1,10480|3,1050|1,10505|1,10547|11,10568|8,10597|6,10633|1,10677|1,10694|1,10734|1,10771|1,10803|1,10856|1,10906|1,10920|1,10931|1,10968|1,10991|1,11008|1,11061|1,11078|1,11083|1,11108|1,11110|1,11801|1,11902|1,12179|2,12252|1,12309|1,12313|2,12315|2,12321|1,12328|1,12337|1,12343|1,12575|1,12583|1,1262|3,12715|1,12735|1,12755|1,13871|1,156|2,1913|3,193|4,2052|1,2059|1,2722|1,3000|2,32…
11B	5	10552|10850|12402|13899|5969	10552	8	12	10552|8,10850|1,12402|1,13899|1,5969|1
11C	1	3804	3804	1	1	3804|1
11D	1	62	62	1	1	62|1
11F	1	7212	7212	1	1	7212|1
12B	4	10583|10812|5656|989	10583	7	11	10583|7,10812|1,5656|2,989|1
12F	≥27	10663|11027|11075|11105|11767|11768|12342|12784|13950|1527|1820|218|220|2416|3377|3524|3774|3776|4187|5026|7110|7194|7228|8102|8376|8798|989|Unknown	989	150	390	10663|2,11027|1,11075|6,11105|1,11767|5,11768|4,12342|1,12784|1,13950|1,1527|1,1820|1,218|32,220|31,2416|42,3377|4,3524|1,3774|86,3776|1,4187|2,5026|6,7110|3,7194|1,7228|1,8102|1,8376|1,8798|2,989|150,Unknown|2
13	43	10355|10374|10473|10595|10702|1078|10849|11025|11327|11710|11711|11712|11720|11750|11757|11776|123|12476|12581|12595|12786|12797|12810|156|2053|2174|2754|3129|5115|5279|5593|5643|5647|574|6698|70|71|7539|761|7660|901|9462|9569	5647	72	267	10355|7,10374|3,10473|1,10595|5,10702|2,1078|1,10849|1,11025|1,11327|4,11710|4,11711|11,11712|3,11720|8,11750|2,11757|2,11776|1,123|4,12476|1,12581|1,12595|1,12786|1,12797|1,12810|1,156|2,2053|70,2174|1,2754|1,3129|1,5115|9,5279|2,5593|9,5643|1,5647|72,574|2,6698|2,70|2,71|1,7539|1,761|1,7660|1,901|21,9462|1,9569|1
14	≥141	10413|10449|10696|10714|10737|10745|10747|10758|10778|10786|10814|10831|10894|11022|11029|11030|11112|11399|11675|11687|11748|11749|1191|12232|1227|12334|12364|12379|124|12487|12505|12506|12507|12508|12552|12555|12559|1262|12699|12704|12723|12830|12834|12837|12839|129|13|13885|13931|13932|13933|143|1492|15|1556|156|1569|1592|16|1836|200|2037|2108|2128|2215|230|2306|2335|236|24|2414|242|2447|246|2…	156	231	1412	10413|1,10449|1,10696|1,10714|1,10737|1,10745|1,10747|1,10758|1,10778|1,10786|1,10814|1,10831|1,10894|1,11022|1,11029|1,11030|1,11112|1,11399|1,11675|1,11687|3,11748|3,11749|3,1191|1,12232|1,1227|8,12334|1,12364|1,12379|1,124|68,12487|2,12505|1,12506|1,12507|1,12508|1,12552|1,12555|1,12559|1,1262|1,12699|1,12704|1,12723|1,12830|1,12834|1,12837|1,12839|1,129|2,13|49,13885|1,13931|1,13932|1,13933|1…
15A	≥80	10065|10423|10425|10550|10554|10588|10594|10602|10605|10618|10629|10654|10698|10761|10764|1078|10861|10939|11175|11725|11726|11727|11732|11733|11766|1228|12293|12294|12297|12331|12492|12518|12524|12576|12578|12603|12613|12616|13878|13886|13894|13952|1591|1914|1915|2216|2420|2575|2613|2647|292|3058|3801|3811|3816|3824|410|4899|4913|4965|5000|5448|5453|58|6011|63|67|6733|7067|7069|73|7429|817|8324|…	63	72	343	10065|1,10423|2,10425|2,10550|12,10554|7,10588|5,10594|4,10602|3,10605|3,10618|7,10629|1,10654|2,10698|1,10761|2,10764|1,1078|3,10861|1,10939|1,11175|1,11725|1,11726|14,11727|2,11732|7,11733|2,11766|14,1228|1,12293|1,12294|1,12297|1,12331|1,12492|1,12518|2,12524|1,12576|1,12578|1,12603|1,12613|1,12616|1,13878|1,13886|2,13894|3,13952|1,1591|1,1914|3,1915|3,2216|1,2420|3,2575|1,2613|3,2647|2,292|1,…
15B	≥68	1|10161|1025|10577|10603|10617|10638|10721|11081|11697|11702|11763|11797|11920|1200|12127|12253|12327|12376|12611|1262|1264|12711|12722|12816|13875|156|162|16505|16506|172|193|1938|1961|199|200|201|2220|2606|3280|338|3397|346|3669|3934|4033|411|4209|5808|5809|6829|6985|7052|7479|7522|766|83|8495|8687|8712|8914|910|9553|9572|9763|9764|9765|9936|Unknown	199	67	397	1|1,10161|3,1025|1,10577|5,10603|8,10617|1,10638|1,10721|1,11081|1,11697|2,11702|1,11763|8,11797|1,11920|1,1200|1,12127|1,12253|1,12327|1,12376|1,12611|1,1262|25,1264|2,12711|1,12722|1,12816|1,13875|1,156|1,162|4,16505|1,16506|1,172|3,193|1,1938|1,1961|7,199|67,200|4,201|2,2220|4,2606|1,3280|5,338|1,3397|1,346|5,3669|9,3934|1,4033|7,411|6,4209|60,5808|1,5809|1,6829|1,6985|1,7052|23,7479|3,7522|2,…
15BC	38	1025|10577|10603|10739|10918|11057|11087|11702|12129|12614|1262|1264|12729|162|172|1835|199|2154|2758|3201|3275|3280|3397|346|3557|4715|6343|66|7052|7479|7768|8326|8496|8820|9257|9766|9768|9975	7052	43	174	1025|3,10577|1,10603|4,10739|1,10918|1,11057|1,11087|1,11702|3,12129|1,12614|1,1262|30,1264|3,12729|1,162|2,172|2,1835|2,199|37,2154|1,2758|1,3201|1,3275|1,3280|6,3397|8,346|4,3557|1,4715|1,6343|1,66|2,7052|43,7479|1,7768|2,8326|1,8496|1,8820|1,9257|1,9766|1,9768|1,9975|1
15C	≥30	10617|11019|11081|11763|12132|12327|12350|12615|1262|13869|162|172|199|201|2220|3669|4033|411|4209|5461|5542|5808|6187|645|8687|910|9553|9572|9767|9936|Unknown	4209	45	177	10617|1,11019|1,11081|1,11763|11,12132|1,12327|1,12350|1,12615|1,1262|1,13869|1,162|1,172|3,199|13,201|1,2220|1,3669|9,4033|16,411|2,4209|45,5461|3,5542|2,5808|4,6187|1,645|1,8687|33,910|7,9553|4,9572|7,9767|1,9936|2,Unknown|1
15F	2	6202|6740	6202	4	7	6202|4,6740|3
16A	1	6543	6543	1	1	6543|1
16F	≥102	10148|10170|10224|10439|10470|10527|10543|10548|10584|10592|10635|10651|10667|10670|10673|10730|10733|10787|10800|10805|10853|10858|10862|10908|10950|10981|11054|11055|11068|11072|11079|11080|11089|11090|11111|11113|11120|11723|11764|11770|11771|11772|11916|12137|12143|12187|12258|12284|12467|12504|12519|12530|12550|12551|12592|12743|12807|12836|13124|13867|13900|13946|13949|13955|1840|2042|2258|…	4088	31	391	10148|2,10170|1,10224|1,10439|1,10470|2,10527|5,10543|24,10548|7,10584|4,10592|6,10635|2,10651|2,10667|3,10670|2,10673|2,10730|1,10733|1,10787|1,10800|1,10805|1,10853|1,10858|1,10862|1,10908|1,10950|1,10981|1,11054|1,11055|1,11068|1,11072|1,11079|1,11080|1,11089|1,11090|3,11111|2,11113|2,11120|1,11723|3,11764|1,11770|14,11771|2,11772|2,11916|1,12137|1,12143|1,12187|1,12258|1,12284|1,12467|1,12504…
17A	2	2599|6946	2599|6946	1	2	2599|1,6946|1
17F	45	10564|10593|10623|10626|10647|10689|10867|10872|10946|10962|10986|11003|11031|11096|11097|11098|11708|11737|11738|11744|11900|12280|123|12579|13918|1794|1924|2355|3058|338|392|4112|5098|5281|574|6189|739|7619|8812|8829|8835|910|9490|9526|9926	392	36	154	10564|5,10593|7,10623|2,10626|3,10647|3,10689|1,10867|1,10872|1,10946|1,10962|1,10986|1,11003|1,11031|1,11096|1,11097|1,11098|1,11708|2,11737|5,11738|2,11744|4,11900|1,12280|2,123|3,12579|1,13918|1,1794|1,1924|1,2355|14,3058|3,338|1,392|36,4112|1,5098|3,5281|2,574|1,6189|2,739|2,7619|1,8812|1,8829|1,8835|16,910|6,9490|1,9526|4,9926|5
18A	≥17	10414|10588|10668|10715|10781|10848|12159|1232|12788|12791|12806|241|5063|6063|7442|9517|9537|Unknown	241	30	55	10414|2,10588|1,10668|3,10715|1,10781|1,10848|1,12159|1,1232|4,12788|1,12791|1,12806|1,241|30,5063|1,6063|1,7442|1,9517|2,9537|2,Unknown|1
18B	9	113|1233|133|193|4706|6236|6239|6245|638	113	4	13	113|4,1233|1,133|1,193|2,4706|1,6236|1,6239|1,6245|1,638|1
18C	≥73	1016|102|10324|1073|10746|10774|10779|10833|10994|113|11698|11699|12141|12203|123|1233|12351|12368|12517|12544|12584|12596|12602|12838|12844|133|1358|1381|1515|1516|1711|1844|1923|193|2192|280|2927|3060|3065|4350|4706|4893|496|5068|5266|542|5440|6145|6236|6237|6239|6245|632|6346|638|7195|7262|7723|8316|8317|8681|870|9280|9470|9484|9511|9512|9513|9516|9522|9903|9921|9925|Unknown	870	26	284	1016|6,102|12,10324|1,1073|8,10746|1,10774|1,10779|1,10833|1,10994|1,113|19,11698|3,11699|2,12141|1,12203|1,123|1,1233|15,12351|2,12368|1,12517|1,12544|1,12584|1,12596|1,12602|1,12838|1,12844|1,133|1,1358|1,1381|12,1515|1,1516|3,1711|1,1844|1,1923|1,193|8,2192|1,280|1,2927|1,3060|6,3065|1,4350|2,4706|1,4893|10,496|18,5068|7,5266|8,542|2,5440|1,6145|1,6236|6,6237|1,6239|21,6245|12,632|1,6346|1,638…
18F	12	10813|12549|2425|2711|280|4651|5456|6717|7182|8840|9523|9536	9523	4	20	10813|1,12549|1,2425|1,2711|1,280|1,4651|1,5456|1,6717|3,7182|1,8840|3,9523|4,9536|2
19A	≥216	10143|10150|10159|10178|10223|10363|10416|10542|10621|10628|10629|10634|10676|10690|10693|10703|10722|10741|10744|10756|10790|10829|10834|10843|10870|10877|10896|10917|10952|11023|11065|11076|11085|11114|11122|1118|1131|11328|11677|11678|11679|11691|11714|11715|11782|11899|1201|12152|12154|12191|12226|12292|12304|12307|12316|12324|12345|12358|12360|12377|12473|12474|12477|12488|12521|12564|12586|…	2062	201	1269	10143|1,10150|1,10159|1,10178|1,10223|1,10363|1,10416|1,10542|24,10621|1,10628|1,10629|3,10634|2,10676|2,10690|1,10693|1,10703|1,10722|1,10741|1,10744|1,10756|1,10790|1,10829|1,10834|1,10843|1,10870|1,10877|1,10896|3,10917|1,10952|1,11023|1,11065|1,11076|1,11085|2,11114|1,11122|1,1118|4,1131|3,11328|1,11677|2,11678|8,11679|1,11691|11,11714|3,11715|2,11782|2,11899|1,1201|3,12152|1,12154|1,12191|1,…
19B	≥18	10427|10627|10806|10942|10992|11037|11706|11707|12277|12501|12604|199|5036|5095|6690|8152|9449|9570|Unknown	10427	16	70	10427|16,10627|2,10806|1,10942|1,10992|3,11037|1,11706|1,11707|1,12277|1,12501|1,12604|1,199|5,5036|1,5095|10,6690|6,8152|2,9449|3,9570|13,Unknown|1
19C	1	3785	3785	1	1	3785|1
19F	≥284	1025|10294|10296|10304|10310|10450|10536|10553|10554|10558|10572|10589|10598|10619|10622|10632|10641|10648|10655|10658|10669|10678|10683|10706|10709|10716|10731|10740|10752|10762|10784|10794|10795|10798|10810|10811|10817|10822|10823|10825|10827|10842|1087|10879|10881|10883|10903|10905|10914|10932|10933|10935|10941|10943|10949|10974|10988|11013|11014|11017|11034|11086|11101|11109|11115|11116|11118…	4414	279	1381	1025|1,10294|2,10296|7,10304|6,10310|1,10450|1,10536|1,10553|8,10554|1,10558|6,10572|8,10589|5,10598|4,10619|5,10622|2,10632|2,10641|2,10648|2,10655|2,10658|2,10669|4,10678|2,10683|1,10706|1,10709|1,10716|1,10731|1,10740|2,10752|1,10762|1,10784|1,10794|1,10795|1,10798|1,10810|1,10811|1,10817|1,10822|1,10823|1,10825|1,10827|1,10842|1,1087|1,10879|2,10881|1,10883|1,10903|1,10905|1,10914|1,10932|1,1…
20	29	1030|10545|10625|10633|10973|11060|11724|11775|12230|12237|12243|1257|12750|12800|13913|235|4160|4745|5392|5474|5726|6188|6693|702|7651|7841|8824|9552|9745	10545	25	111	1030|5,10545|25,10625|14,10633|3,10973|1,11060|1,11724|3,11775|2,12230|1,12237|1,12243|1,1257|4,12750|1,12800|1,13913|1,235|4,4160|1,4745|4,5392|5,5474|2,5726|8,6188|1,6693|11,702|1,7651|1,7841|1,8824|2,9552|5,9745|1
21	≥38	10448|10456|10854|10885|10909|10951|11059|11094|11730|11735|11760|11773|11774|12138|12278|12279|1233|1358|1746|1877|193|2169|3280|3689|4021|432|4321|5103|6190|6689|7068|7435|7436|7600|7705|889|9517|Unknown|novel15	5103	48	199	10448|3,10456|5,10854|2,10885|3,10909|1,10951|1,11059|1,11094|1,11730|4,11735|3,11760|2,11773|3,11774|5,12138|1,12278|1,12279|1,1233|3,1358|1,1746|2,1877|8,193|34,2169|15,3280|1,3689|2,4021|1,432|10,4321|1,5103|48,6190|1,6689|4,7068|10,7435|1,7436|1,7600|4,7705|1,889|1,9517|8,Unknown|4,novel15|1
22A	10	10600|11057|12158|2419|5266|5973|7181|7564|910|9459	910	16	40	10600|11,11057|1,12158|1,2419|1,5266|5,5973|1,7181|1,7564|1,910|16,9459|2
22F	≥35	1012|10163|10164|10165|10167|10226|10819|10851|11802|12572|12708|12710|1294|1337|1470|1901|214|2557|3734|4325|433|445|4553|5508|5577|5675|6403|6709|698|7314|7671|8005|819|9456|9546|Unknown	433	133	235	1012|1,10163|1,10164|1,10165|1,10167|1,10226|1,10819|1,10851|2,11802|1,12572|1,12708|1,12710|1,1294|4,1337|4,1470|1,1901|2,214|1,2557|2,3734|1,4325|1,433|133,445|23,4553|1,5508|1,5577|2,5675|2,6403|7,6709|9,698|10,7314|7,7671|1,8005|1,819|3,9456|1,9546|2,Unknown|3
23A	≥46	1011|10325|10451|10462|10727|10921|10958|11063|11102|11106|12122|12139|12176|12370|12371|12511|12577|12733|12826|13873|13874|166|1839|190|2218|2319|2572|338|4028|42|436|438|439|5080|5242|5473|5675|7318|7336|7461|7480|7706|7707|8029|8802|992|Unknown	338	58	225	1011|1,10325|1,10451|2,10462|1,10727|1,10921|1,10958|1,11063|2,11102|1,11106|2,12122|1,12139|1,12176|1,12370|2,12371|2,12511|1,12577|1,12733|1,12826|1,13873|1,13874|1,166|1,1839|8,190|2,2218|3,2319|17,2572|6,338|58,4028|1,42|22,436|3,438|21,439|8,5080|18,5242|1,5473|1,5675|2,7318|13,7336|2,7461|1,7480|1,7706|1,7707|1,8029|1,8802|1,992|2,Unknown|4
23B	≥45	10149|10567|10590|10674|10719|10724|1078|10880|1094|10947|11103|11676|11688|11765|12153|12236|12291|12403|12742|1349|1373|13908|1448|162|1847|2372|2911|33|36|387|4334|439|4423|5511|5706|6140|63|6707|7424|7672|7687|775|945|9566|9931|Unknown	439	55	248	10149|2,10567|2,10590|4,10674|3,10719|1,10724|1,1078|1,10880|2,1094|1,10947|1,11103|2,11676|12,11688|2,11765|3,12153|1,12236|1,12291|2,12403|1,12742|1,1349|1,1373|11,13908|1,1448|1,162|1,1847|9,2372|1,2911|15,33|1,36|4,387|2,4334|1,439|55,4423|8,5511|9,5706|42,6140|1,63|1,6707|16,7424|2,7672|2,7687|12,775|1,945|2,9566|1,9931|1,Unknown|4
23F	≥181	1012|10389|10405|10417|10463|1047|10472|10474|10483|10484|10485|10487|10488|10489|10499|10533|10571|10604|10607|10609|10636|10644|10653|10684|10688|10712|10728|10732|10738|10754|10759|1078|10782|10796|10816|10828|10859|10869|10878|10887|10889|10936|10960|10995|10998|11011|11028|11036|11040|11044|11056|11069|11092|11119|11336|11656|11694|11718|11752|12147|12173|12238|12251|12276|12330|12347|12355|…	802	192	1137	1012|1,10389|2,10405|1,10417|1,10463|4,1047|1,10472|1,10474|2,10483|1,10484|1,10485|2,10487|1,10488|1,10489|5,10499|1,10533|1,10571|8,10604|3,10607|1,10609|3,10636|2,10644|2,10653|3,10684|1,10688|2,10712|1,10728|1,10732|1,10738|1,10754|1,10759|1,1078|10,10782|1,10796|1,10816|1,10828|1,10859|1,10869|1,10878|1,10887|1,10889|1,10936|1,10960|1,10995|1,10998|2,11011|5,11028|2,11036|1,11040|1,11044|1,1…
24A	2	5079|6708	5079|6708	1	2	5079|1,6708|1
24B	1	162	162	1	1	162|1
24F	≥4	10382|5077|6696|6706|Unknown	6696	5	13	10382|1,5077|2,6696|5,6706|4,Unknown|1
[truncated: 33 more rows]

## Sheet: Table S9
Table S9 The serotypes associated with each ST
[truncated: 2,817 more rows]

## Sheet: Table S10
Table S10 The CapT analysis for each genome by Pneumo-Typer
[truncated: 17,408 more rows]

[truncated: 1 more sheets: Table S11]
